# Supplementary material
Source: MDPI journal article supplement (https://www.mdpi.com/1424-8247/15/7/792)
Supplement: s1 [file s1]

## Supplementary Materials

### Design and Synthesis of New Pyrimidine- Quinolone Hybrids as Novel *h*LDHA Inhibitors

Iván Díaz, Sofia Salido, Manuel Nogueras and Justo Cobo \*

Facultad de Ciencias Experimentales, Departamento de Química Inorgánica y Orgánica, Universidad de Jaén, E-23071 Jaén, Spain; idc00005@red.ujaen.es (I.D.); ssalido@ujaen.es (S.S.); mmontiel@ujaen.es (M.N.)

\* Correspondence: jcobo@ujaen.es

## Table of contents.

|                                           |    |
|-------------------------------------------|----|
| 1. <i>In-silico</i> studies .....         | 4  |
| 2. Chemistry .....                        | 7  |
| 3. LDHA biological assays. ....           | 8  |
| 3.1 Dose-response inhibition curves ..... | 8  |
| 4. NMR, MS and HRMS spectra. ....         | 14 |
| 4.1 Compound 8 .....                      | 14 |
| 4.2 Compound 9 .....                      | 17 |
| 4.3 Compound 15 .....                     | 20 |
| 4.4 Compound 19 .....                     | 23 |
| 4.5 Compound 22a .....                    | 26 |
| 4.6 Compound 22b .....                    | 29 |
| 4.7 Compound 22c .....                    | 32 |
| 4.8 Compound 23a .....                    | 35 |
| 4.9 Compound 23b .....                    | 38 |
| 4.10 Compound 23c .....                   | 41 |
| 4.11 Compound 24a .....                   | 44 |
| 4.12 Compound 24b .....                   | 47 |
| 4.13 Compound 24c .....                   | 50 |
| 4.14 Compound 25a .....                   | 53 |
| 4.15 Compound 25b .....                   | 56 |
| 4.16 Compound 25c .....                   | 59 |
| 4.17 Compound 26a .....                   | 62 |
| 4.18 Compound 26b .....                   | 65 |
| 4.19 Compound 26c .....                   | 68 |
| 4.20 Compound 27a .....                   | 71 |
| 4.21 Compound 27b .....                   | 74 |
| 4.22 Compound 27c .....                   | 77 |
| 4.23 Compound 28a .....                   | 80 |
| 4.24 Compound 28b .....                   | 83 |
| 4.25 Compound 28c .....                   | 86 |
| 4.26 Compound 29a .....                   | 89 |
| 4.27 Compound 29b .....                   | 92 |
| 4.28 Compound 29c .....                   | 95 |

|      |                    |     |
|------|--------------------|-----|
| 4.29 | Compound 30a ..... | 98  |
| 4.30 | Compound 30b ..... | 101 |
| 4.31 | Compound 30c ..... | 104 |
| 4.32 | Compound 31a ..... | 107 |
| 4.33 | Compound 31b ..... | 110 |
| 4.34 | Compound 31c ..... | 113 |
| 4.35 | Compound 32a ..... | 116 |
| 4.36 | Compound 32b ..... | 119 |
| 4.37 | Compound 32c ..... | 122 |
| 4.38 | Compound 35a ..... | 125 |
| 4.39 | Compound 35b ..... | 128 |
| 4.40 | Compound 35c ..... | 131 |

# 1. *In-silico* studies

**Table S1.** Affinity and energy values (kcal/mol) involved in the interaction of the screening compounds (**10–21**) and reference **W31** when docked in the LDHA active site.

| Compound   | S       | Arg <sup>168</sup> | His <sup>192</sup> | Asn <sup>137</sup> | Asp <sup>194</sup> |
|------------|---------|--------------------|--------------------|--------------------|--------------------|
| <b>W31</b> | -10,444 | -8,7               | -6                 | -3,6               | -3,5               |
| <b>10</b>  | -9,950  | -10,3              | 0                  | 0                  | -7,7               |
| <b>11</b>  | -9,301  | 0                  | -2,7               | -4,5               | 0                  |
| <b>12</b>  | -7,467  | 0                  | 0                  | 0                  | -10.1              |
| <b>13</b>  | -9,601  | -7.1               | 0                  | 0                  | -4.7               |
| <b>14</b>  | -9,983  | -5.7               | -3.2               | 0                  | -3.5               |
| <b>15</b>  | -9,231  | -1,6               | 0                  | 0                  | -5                 |
| <b>16</b>  | -9,372  | 0                  | -2,6               | -4,4               | 0                  |
| <b>17</b>  | -9,463  | -6,5               | 0                  | 0                  | 0                  |
| <b>18</b>  | -9,917  | -6                 | 0                  | 0                  | -3,4               |
| <b>19</b>  | -8,130  | 0                  | 0                  | 0                  | 0                  |
| <b>20</b>  | -8,70   | 0                  | 0                  | 0                  | -2,5               |
| <b>21</b>  | -8,399  | 0                  | -2,5               | -4,5               | 0                  |

**Table S2.** Affinity and energy values (kcal/mol) involved in the interaction of the screening compounds (**10–21**) and reference **NAD** when docked in the NAD site.

| Compound   | S       | Asp <sup>51</sup> | Val <sup>135</sup> | Arg <sup>98</sup> | Val <sup>30</sup> |
|------------|---------|-------------------|--------------------|-------------------|-------------------|
| <b>NAD</b> | -13,280 | -7,7              | -3,7               | -16,9             | -5,6              |
| <b>10</b>  | -9,847  | 0                 | -3,9               | -4,3              | 0                 |
| <b>11</b>  | -8,446  | 0                 | -3,3               | -5,9              | 0                 |
| <b>12</b>  | -8,668  | 0                 | 0                  | 0                 | 0                 |
| <b>13</b>  | -9,782  | 0                 | 0                  | 0                 | 0                 |
| <b>14</b>  | -8,431  | -3.4              | 0                  | 0                 | 0                 |
| <b>15</b>  | -8,001  | 0                 | 0                  | -2,4              | 0                 |
| <b>16</b>  | -8,499  | -0,7              | 0                  | 0                 | 0                 |
| <b>17</b>  | -8,597  | -0,6              | 0                  | 0                 | 0                 |
| <b>18</b>  | -8,588  | 0                 | 0                  | 0                 | 0                 |
| <b>19</b>  | -8,486  | 0                 | 0                  | 0                 | 0                 |
| <b>20</b>  | -8,829  | 0                 | 0                  | 0                 | 0                 |
| <b>21</b>  | -9,073  | 0                 | 0                  | 0                 | 0                 |



**Table S3.** Affinity and energy values (kcal/mol) involved in the interaction of the screening compounds (**10–21**) when docked in the extended site.

| Compound  | S      | Arg <sup>168</sup> | His <sup>192</sup> | Asn <sup>137</sup> | Asp <sup>194</sup> | Asp <sup>51</sup> | Val <sup>135</sup> | Arg <sup>98</sup> | Val <sup>30</sup> |
|-----------|--------|--------------------|--------------------|--------------------|--------------------|-------------------|--------------------|-------------------|-------------------|
| <b>10</b> | -8,652 | -3,1               | 0                  | -1,3               | 0                  | 0                 | 0                  | 0                 | 0                 |
| <b>11</b> | -7,608 | -9,3               | -7                 | -3,4               | -3,4               | 0                 | 0                  | 0                 | 0                 |
| <b>12</b> | -8,727 | -0,7               | 0                  | 0                  | 0                  | 0                 | 0                  | 0                 | 0                 |
| <b>13</b> | -8,239 | 0                  | 0                  | 0                  | 0                  | 0                 | 0                  | 0                 | 0                 |
| <b>14</b> | -8,121 | 0                  | -5,8               | 0                  | -4,8               | 0                 | 0                  | 0                 | 0                 |
| <b>15</b> | -8,098 | 0                  | 0                  | -0,7               | 0                  | 0                 | 0                  | 0                 | 0                 |
| <b>16</b> | -7,857 | 0                  | -3,1               | -4,9               | 0                  | 0                 | 0                  | 0                 | 0                 |
| <b>17</b> | -8,172 | 0                  | 0                  | 0                  | -1,6               | 0                 | 0                  | 0                 | 0                 |
| <b>18</b> | -8,658 | 0                  | 0                  | 0                  | 0                  | 0                 | 0                  | 0                 | 0                 |
| <b>19</b> | -8,341 | -2,9               | 0                  | -3,5               | 0                  | 0                 | 0                  | 0                 | 0                 |
| <b>20</b> | -7,826 | 0                  | -4,4               | -0,5               | 0                  | 0                 | 0                  | 0                 | 0                 |
| <b>21</b> | -7,385 | -3,7               | 0                  | -8,1               | 0                  | 0                 | 0                  | 0                 | 0                 |

**Table S4.** Affinity and energy values (kcal/mol) involved in the interaction of compounds **24–31(a–c)** with the main aminoacid residues. If empty, that compound did not pass some of the filtering stages.

| Quinolone          | Aryl                       | Comp.      | Arg <sup>168</sup> | His <sup>192</sup> | Asn <sup>137</sup> | Asp <sup>194</sup> | Affinity |
|--------------------|----------------------------|------------|--------------------|--------------------|--------------------|--------------------|----------|
| 6-H                | 4-ClPh                     | <b>24a</b> | -7,8               | 0                  | 0                  | -4,8               | -9,240   |
|                    | 4-CF <sub>3</sub> Ph       | <b>25a</b> | -4,5               | 0                  | -0,5               | -2                 | -9,781   |
|                    | Naphthalene-2-yl           | <b>26a</b> | -5,1               | 0                  | -0,7               | -3,1               | -10,254  |
|                    | 3,4-(OCH <sub>2</sub> O)Ph | <b>27a</b> |                    |                    |                    |                    |          |
| 6-Cl               | 4-ClPh                     | <b>24b</b> | -4,7               | 0                  | -0,5               | -5,1               | -9,971   |
|                    | 4-CF <sub>3</sub> Ph       | <b>25b</b> | -4,3               | 0                  | -0,6               | -4                 | -10,115  |
|                    | Naphthalene-2-yl           | <b>26b</b> | -5,9               | 0                  | 0                  | -3,1               | -10,355  |
|                    | 3,4-(OCH <sub>2</sub> O)Ph | <b>27b</b> | -5,8               | -2                 | -4,2               | 0                  | -10,066  |
| 6-OCH <sub>3</sub> | 4-ClPh                     | <b>24c</b> | -8,2               | -0,6               | -0,6               | 0                  | -9,215   |
|                    | 4-CF <sub>3</sub> Ph       | <b>25c</b> | -2,2               | 0                  | 0                  | 0                  | -9,442   |
|                    | Naphthalene-2-yl           | <b>26c</b> | -6,6               | 0                  | 0                  | -3,2               | -10,765  |
|                    | 3,4-(OCH <sub>2</sub> O)Ph | <b>27c</b> | -3,7               | 0                  | 0                  | 0                  | -9,353   |
| 6-H                | 4-ClPh                     | <b>28a</b> |                    |                    |                    |                    |          |
|                    | 4-CF <sub>3</sub> Ph       | <b>29a</b> | -11,1              | 0                  | 0                  | 0                  | -9,217   |
|                    | Naphthalene-2-yl           | <b>30a</b> |                    |                    |                    |                    |          |
|                    | 3,4-(OCH <sub>2</sub> O)Ph | <b>31a</b> |                    |                    |                    |                    |          |
| 6-Cl               | 4-ClPh                     | <b>28b</b> | -8,7               | 0                  | 0                  | 0                  | -9,145   |
|                    | 4-CF <sub>3</sub> Ph       | <b>29b</b> | -4,4               | 0                  | 0                  | 0                  | -9,506   |
|                    | Naphthalene-2-yl           | <b>30b</b> |                    |                    |                    |                    |          |
|                    | 3,4-(OCH <sub>2</sub> O)Ph | <b>31b</b> | -2,5               | -0,8               | 0                  | 0                  | -9,024   |
| 6-OCH <sub>3</sub> | 4-ClPh                     | <b>28c</b> |                    |                    |                    |                    |          |
|                    | 4-CF <sub>3</sub> Ph       | <b>29c</b> |                    |                    |                    |                    |          |
|                    | Naphthalene-2-yl           | <b>30c</b> | -5,9               | 0                  | 0                  | 0                  | -9,357   |
|                    | 3,4-(OCH <sub>2</sub> O)Ph | <b>31c</b> | -4,8               | 0                  | 0                  | 0                  | -9,268   |

**Table S5.** Affinity and energy values (kcal/mol) involved in the interaction of the different pyrimidine-quinolone hybrids **24–31(a–c)** and **33–36(a–c)** with the main aminoacid residues. If empty, that compound did not pass some of the filtering stages.

| Quinolone          | Aryl                       | Comp.      | Arg <sup>168</sup> | His <sup>192</sup> | Asn <sup>137</sup> | Asp <sup>194</sup> | Affinity |
|--------------------|----------------------------|------------|--------------------|--------------------|--------------------|--------------------|----------|
| 6-H                | 4-ClPh                     | <b>24a</b> | -7,8               | 0                  | 0                  | -4,8               | -9,240   |
|                    | 4-CF <sub>3</sub> Ph       | <b>25a</b> | -4,5               | 0                  | -0,5               | -2                 | -9,781   |
|                    | Naphthalene-2-yl           | <b>26a</b> | -5,1               | 0                  | -0,7               | -3,1               | -10,254  |
|                    | 3,4-(OCH <sub>2</sub> O)Ph | <b>27a</b> |                    |                    |                    |                    |          |
| 6-Cl               | 4-ClPh                     | <b>24b</b> | -4,7               | 0                  | -0,5               | -5,1               | -9,971   |
|                    | 4-CF <sub>3</sub> Ph       | <b>25b</b> | -4,3               | 0                  | -0,6               | -4                 | -10,115  |
|                    | Naphthalene-2-yl           | <b>26b</b> | -5,9               | 0                  | 0                  | -3,1               | -10,355  |
|                    | 3,4-(OCH <sub>2</sub> O)Ph | <b>27b</b> | -5,8               | -2                 | -4,2               | 0                  | -10,066  |
| 6-OCH <sub>3</sub> | 4-ClPh                     | <b>24c</b> | -8,2               | -0,6               | -0,6               | 0                  | -9,215   |
|                    | 4-CF <sub>3</sub> Ph       | <b>25c</b> | -2,2               | 0                  | 0                  | 0                  | -9,442   |
|                    | Naphthalene-2-yl           | <b>26c</b> | -6,6               | 0                  | 0                  | -3,2               | -10,765  |
|                    | 3,4-(OCH <sub>2</sub> O)Ph | <b>27c</b> | -3,7               | 0                  | 0                  | 0                  | -9,353   |
| 6-H                | 4-ClPh                     | <b>28a</b> |                    |                    |                    |                    |          |
|                    | 4-CF <sub>3</sub> Ph       | <b>29a</b> | -11,1              | 0                  | 0                  | 0                  | -9,217   |
|                    | Naphthalene-2-yl           | <b>30a</b> |                    |                    |                    |                    |          |
|                    | 3,4-(OCH <sub>2</sub> O)Ph | <b>31a</b> |                    |                    |                    |                    |          |
| 6-Cl               | 4-ClPh                     | <b>28b</b> | -8,7               | 0                  | 0                  | 0                  | -9,145   |
|                    | 4-CF <sub>3</sub> Ph       | <b>29b</b> | -4,4               | 0                  | 0                  | 0                  | -9,506   |
|                    | Naphthalene-2-yl           | <b>30b</b> |                    |                    |                    |                    |          |
|                    | 3,4-(OCH <sub>2</sub> O)Ph | <b>31b</b> | -2,5               | -0,8               | 0                  | 0                  | -9,024   |
| 6-OCH <sub>3</sub> | 4-ClPh                     | <b>28c</b> |                    |                    |                    |                    |          |
|                    | 4-CF <sub>3</sub> Ph       | <b>29c</b> |                    |                    |                    |                    |          |
|                    | Naphthalene-2-yl           | <b>30c</b> | -5,9               | 0                  | 0                  | 0                  | -9,357   |
|                    | 3,4-(OCH <sub>2</sub> O)Ph | <b>31c</b> | -4,8               | 0                  | 0                  | 0                  | -9,268   |
| 6-H                | 4-ClPh                     | <b>33a</b> | -6,5               | 0                  | 0                  | 0                  | -9,278   |
|                    | 4-CF <sub>3</sub> Ph       | <b>34a</b> | -6,1               | 0                  | 0                  | -0,9               | -10,134  |
|                    | Naphthalene-2-yl           | <b>35a</b> | -6                 | 0                  | 0                  | -0,9               | -10,324  |
|                    | 3,4-(OCH <sub>2</sub> O)Ph | <b>36a</b> |                    |                    |                    |                    |          |
| 6-Cl               | 4-ClPh                     | <b>33b</b> | -2,8               | 0                  | 0                  | -0,7               | -9,616   |
|                    | 4-CF <sub>3</sub> Ph       | <b>34b</b> | -5,6               | 0                  | 0                  | -6                 | -10,218  |
|                    | Naphthalene-2-yl           | <b>35b</b> | -5,4               | -1,5               | 0                  | -0,5               | -9,693   |
|                    | 3,4-(OCH <sub>2</sub> O)Ph | <b>36b</b> | -5,2               | 0                  | 0                  | -5,3               | -9,820   |
| 6-OCH <sub>3</sub> | 4-ClPh                     | <b>33c</b> | -6,6               | 0                  | 0                  | 0                  | -9,386   |
|                    | 4-CF <sub>3</sub> Ph       | <b>34c</b> | -11,2              | 0                  | -1,5               | 0                  | -9,251   |
|                    | Naphthalene-2-yl           | <b>35c</b> | -6,7               | 0                  | 0                  | 0                  | -9,329   |
|                    | 3,4-(OCH <sub>2</sub> O)Ph | <b>36c</b> |                    |                    |                    |                    |          |

**Table S6.** Mean energy values (kcal/mol) involved in the interaction of hybrids **24–31(a–c)** and **33–36(a–c)** with the main aminoacid residues

| Substitution | Compounds         | Arg <sup>168</sup> | Asp <sup>194</sup> | His <sup>192</sup> | Asn <sup>137</sup> | Affinity |
|--------------|-------------------|--------------------|--------------------|--------------------|--------------------|----------|
| <i>Ortho</i> | <b>24-27(a-c)</b> | -5,3               | -3,6               | -1,3               | -1,2               | -9,869   |
| <i>Para</i>  | <b>28-31(a-c)</b> | -6,2               | 0,0                | -0,8               | 0,0                | -9,253   |
| <i>Meta</i>  | <b>33-36(a-c)</b> | -6,2               | -2,4               | -1,5               | -1,5               | -9,705   |

## 2. Chemistry

**Table S7.** Conditions used in different trials for reaction between intermediates **24–25** and **1–4**.

| Solvent            | Acid | Base                           | Catalyst                     | Heating      |
|--------------------|------|--------------------------------|------------------------------|--------------|
| EtOH               |      |                                |                              | MW (120°C)   |
| EtOH               |      | Et <sub>3</sub> N              |                              | MW (120°C)   |
| EtOH               |      | K <sub>2</sub> CO <sub>3</sub> |                              | MW (120°C)   |
| EtOH               |      | K <sub>2</sub> CO <sub>3</sub> | KI                           | MW (120°C)   |
| EtOH               | pTSA |                                |                              | MW (120°C)   |
| EtOH               | HCl  |                                |                              | MW (120°C)   |
| DMF                |      | K <sub>2</sub> CO <sub>3</sub> | KI                           | MW (160°C)   |
| DMF                |      | K <sub>2</sub> CO <sub>3</sub> | KI                           | MW (180°C)   |
| DMF                |      | K <sub>2</sub> CO <sub>3</sub> | Pd(OAc) <sub>2</sub> + BINAP | 80°C         |
| DMSO               |      | K <sub>2</sub> CO <sub>3</sub> | AgNO <sub>3</sub>            | 80°C → 100°C |
| CH <sub>3</sub> CN |      |                                |                              | MW (120°C)   |
| CH <sub>3</sub> CN |      | Et <sub>3</sub> N              |                              | MW (120°C)   |
| CH <sub>3</sub> CN |      | K <sub>2</sub> CO <sub>3</sub> | Pd(OAc) <sub>2</sub>         | MW (120°C)   |

### 3. LDHA biological assays.

#### 3.1 Dose-response inhibition curves

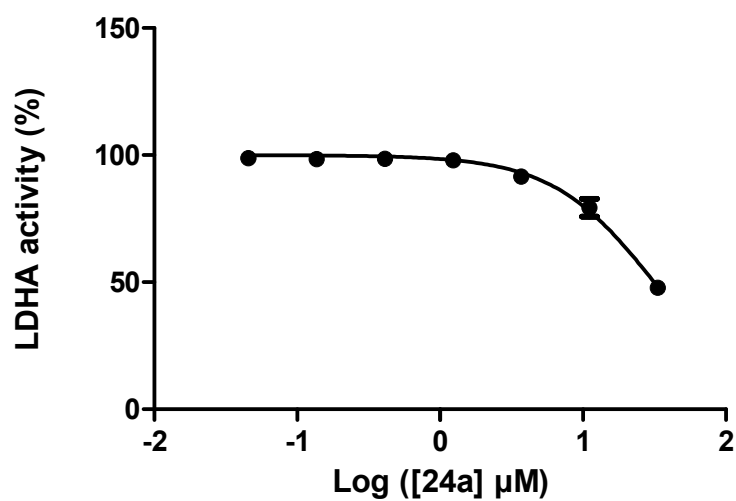

Figure S1. LDHA inhibition curve of compound **24a** (mean  $\pm$  SD of  $n = 3$  replicates)

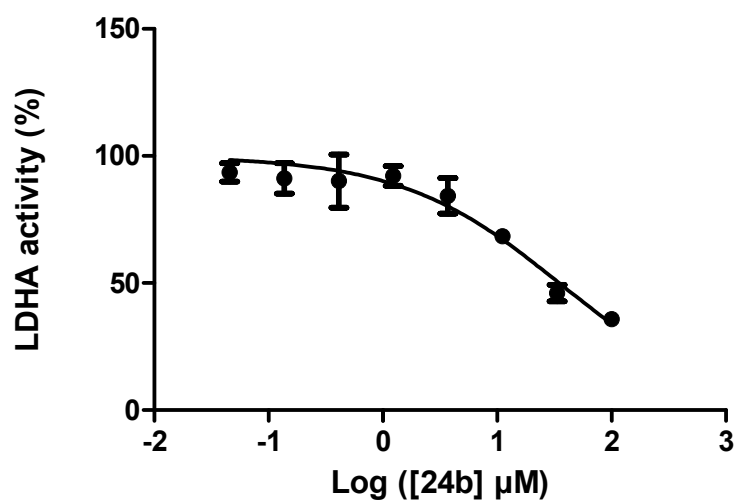

Figure S2. LDHA inhibition curve of compound **24b** (mean  $\pm$  SD of  $n = 3$  replicates)

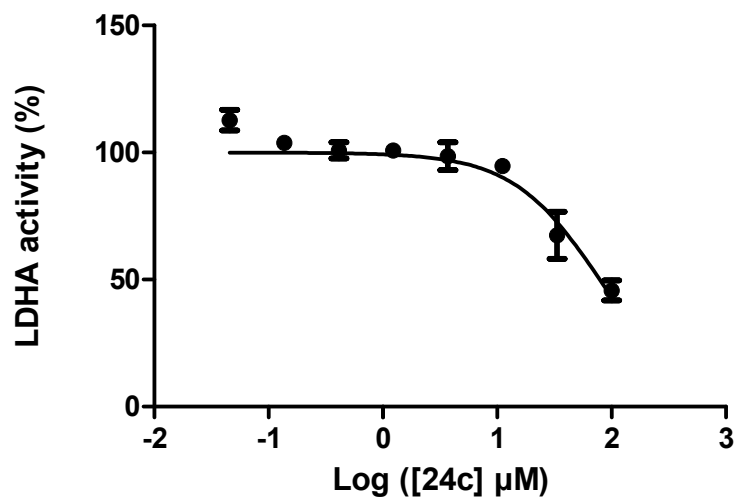

Figure S3. LDHA inhibition curve of compound **24c** (mean  $\pm$  SD of  $n = 3$  replicates)

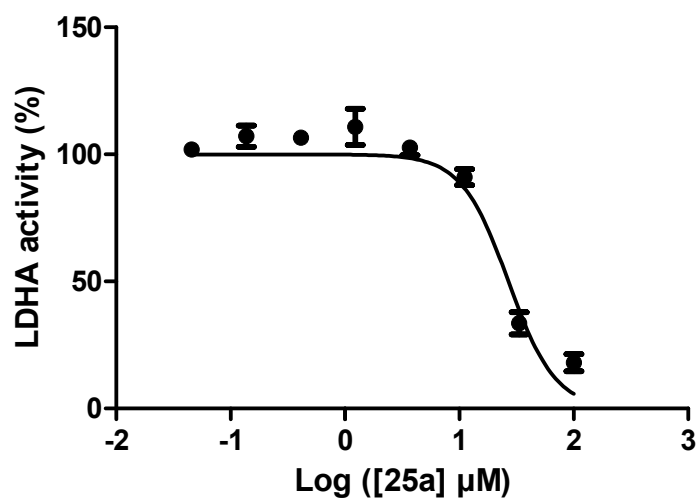

Figure S4. LDHA inhibition curve of compound **25a** (mean  $\pm$  SD of  $n = 3$  replicates)

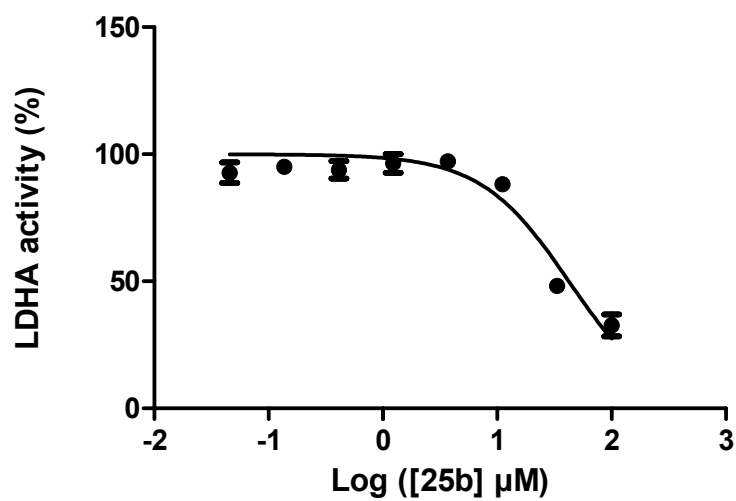

Figure S5. LDHA inhibition curve of compound **25b** (mean  $\pm$  SD of  $n = 3$  replicates)

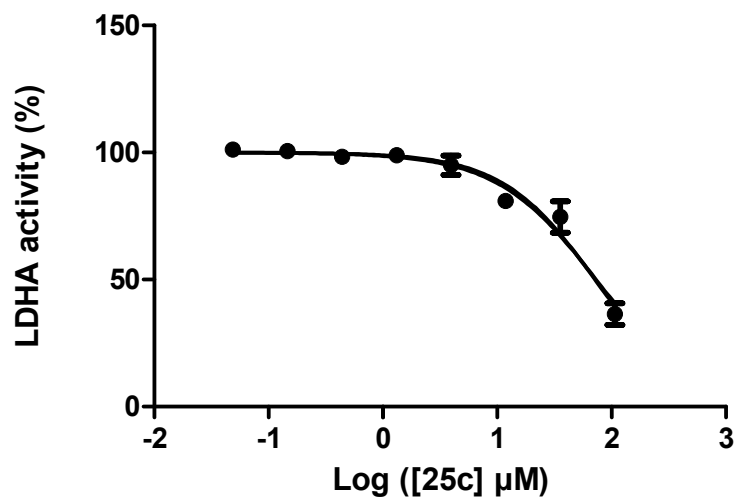

Figure S6. LDHA inhibition curve of compound **25c** (mean  $\pm$  SD of  $n = 3$  replicates)

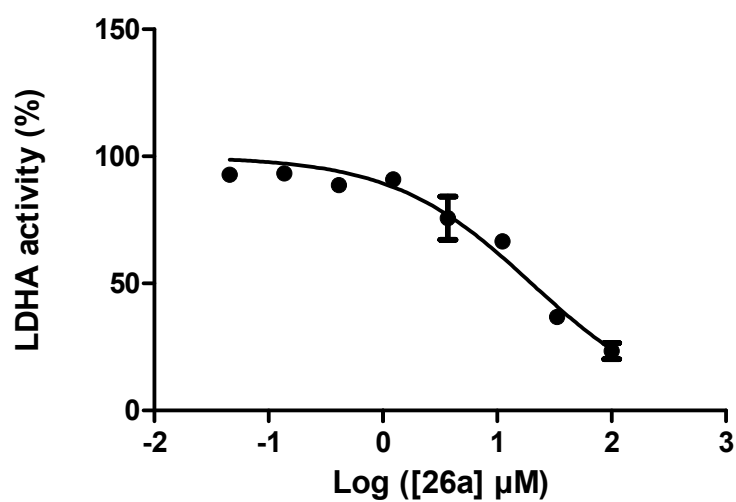

Figure S7. LDHA inhibition curve of compound **26a** (mean  $\pm$  SD of  $n = 3$  replicates)

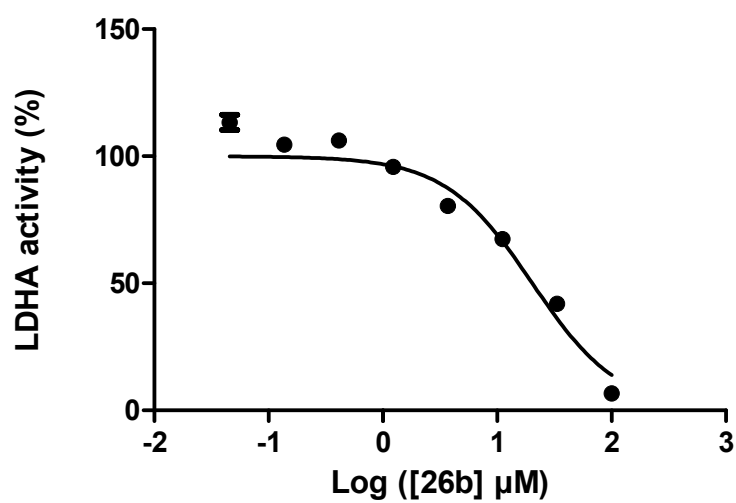

Figure S8. LDHA inhibition curve of compound **26b** (mean  $\pm$  SD of  $n = 3$  replicates)

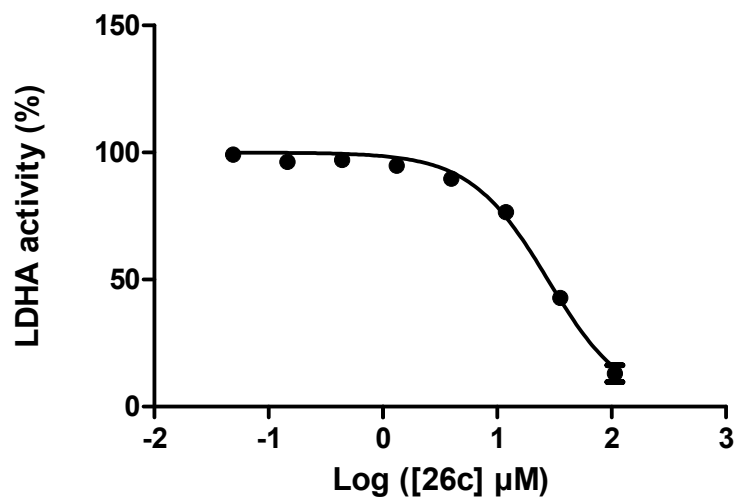

Figure S9. LDHA inhibition curve of compound **26c** (mean  $\pm$  SD of  $n = 3$  replicates)

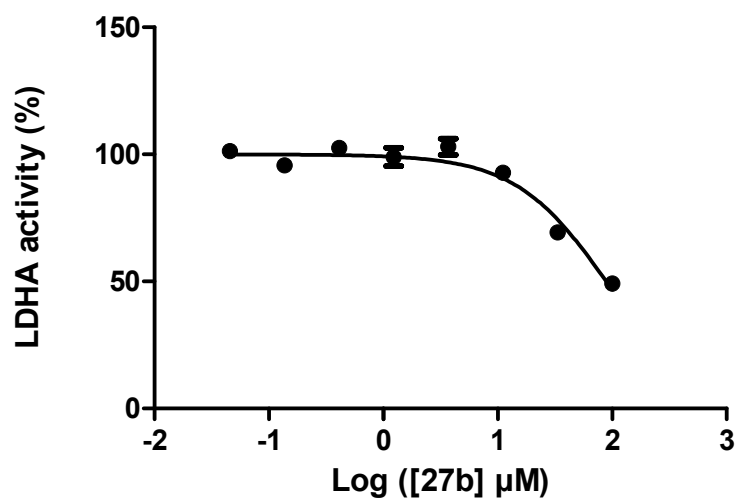

Figure S10. LDHA inhibition curve of compound **27b** (mean  $\pm$  SD of  $n = 3$  replicates)

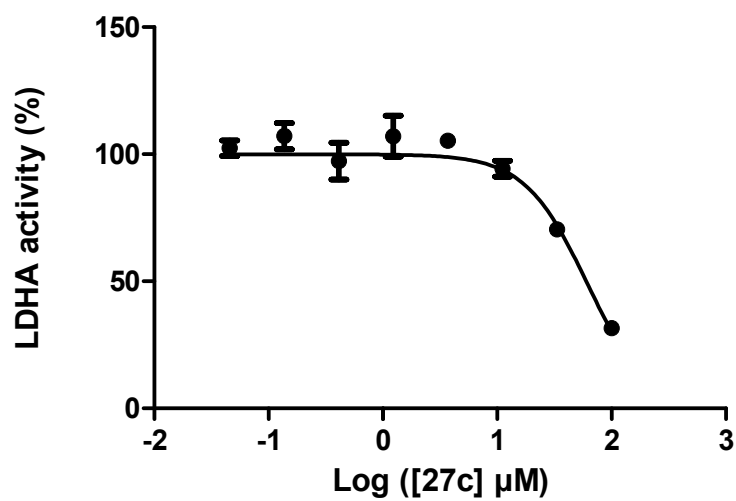

Figure S11. LDHA inhibition curve of compound **27c** (mean  $\pm$  SD of  $n = 3$  replicates)

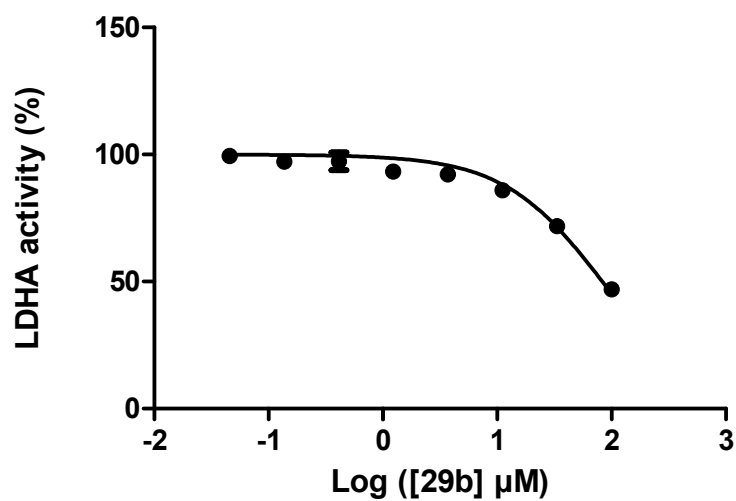

Figure S12. LDHA inhibition curve of compound **29b** (mean  $\pm$  SD of  $n = 3$  replicates)

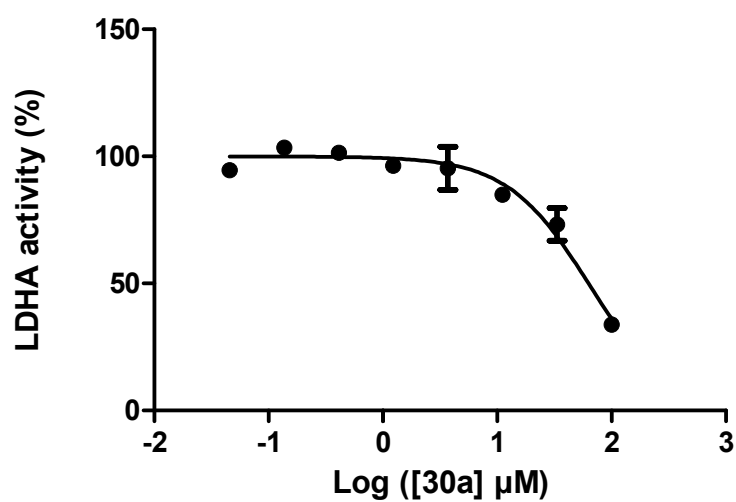

Figure S13. LDHA inhibition curve of compound **30a** (mean  $\pm$  SD of  $n = 3$  replicates)

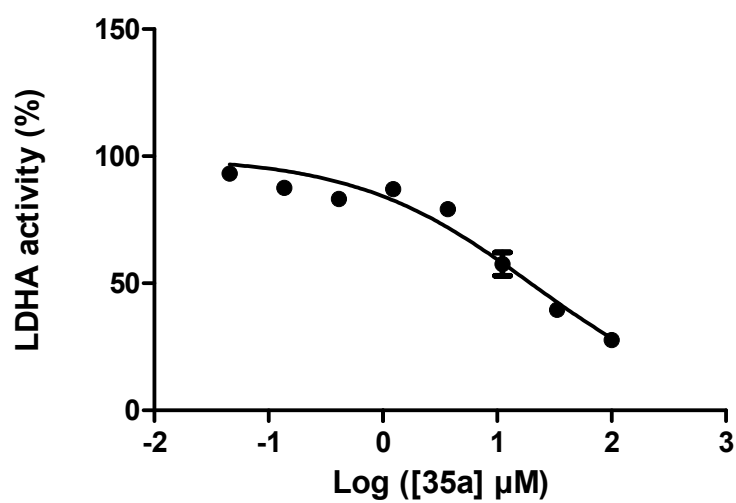

Figure S14. LDHA inhibition curve of compound **35a** (mean  $\pm$  SD of  $n = 3$  replicates)



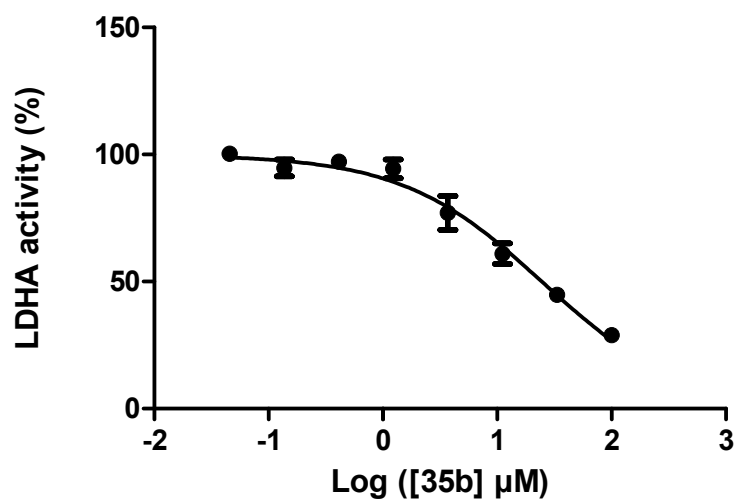

Figure S15. LDHA inhibition curve of compound **35b** (mean  $\pm$  SD of  $n = 3$  replicates)

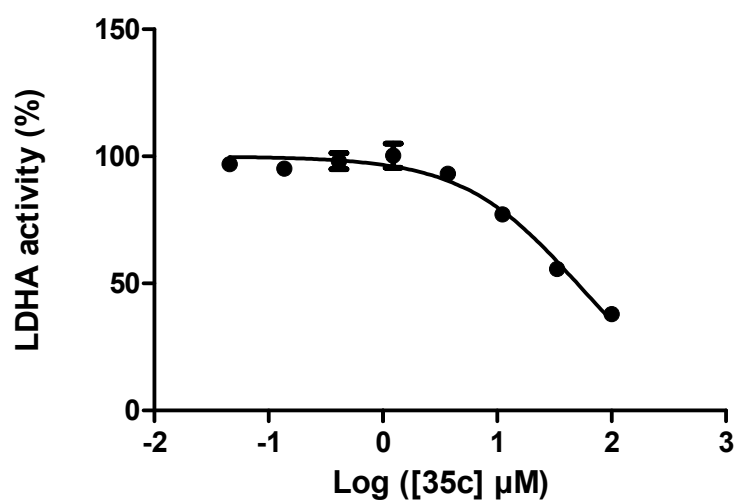

Figure S16. LDHA inhibition curve of compound **35c** (mean  $\pm$  SD of  $n = 3$  replicates)

#### 4. NMR, MS and HRMS spectra.

##### 4.1 Compound 8

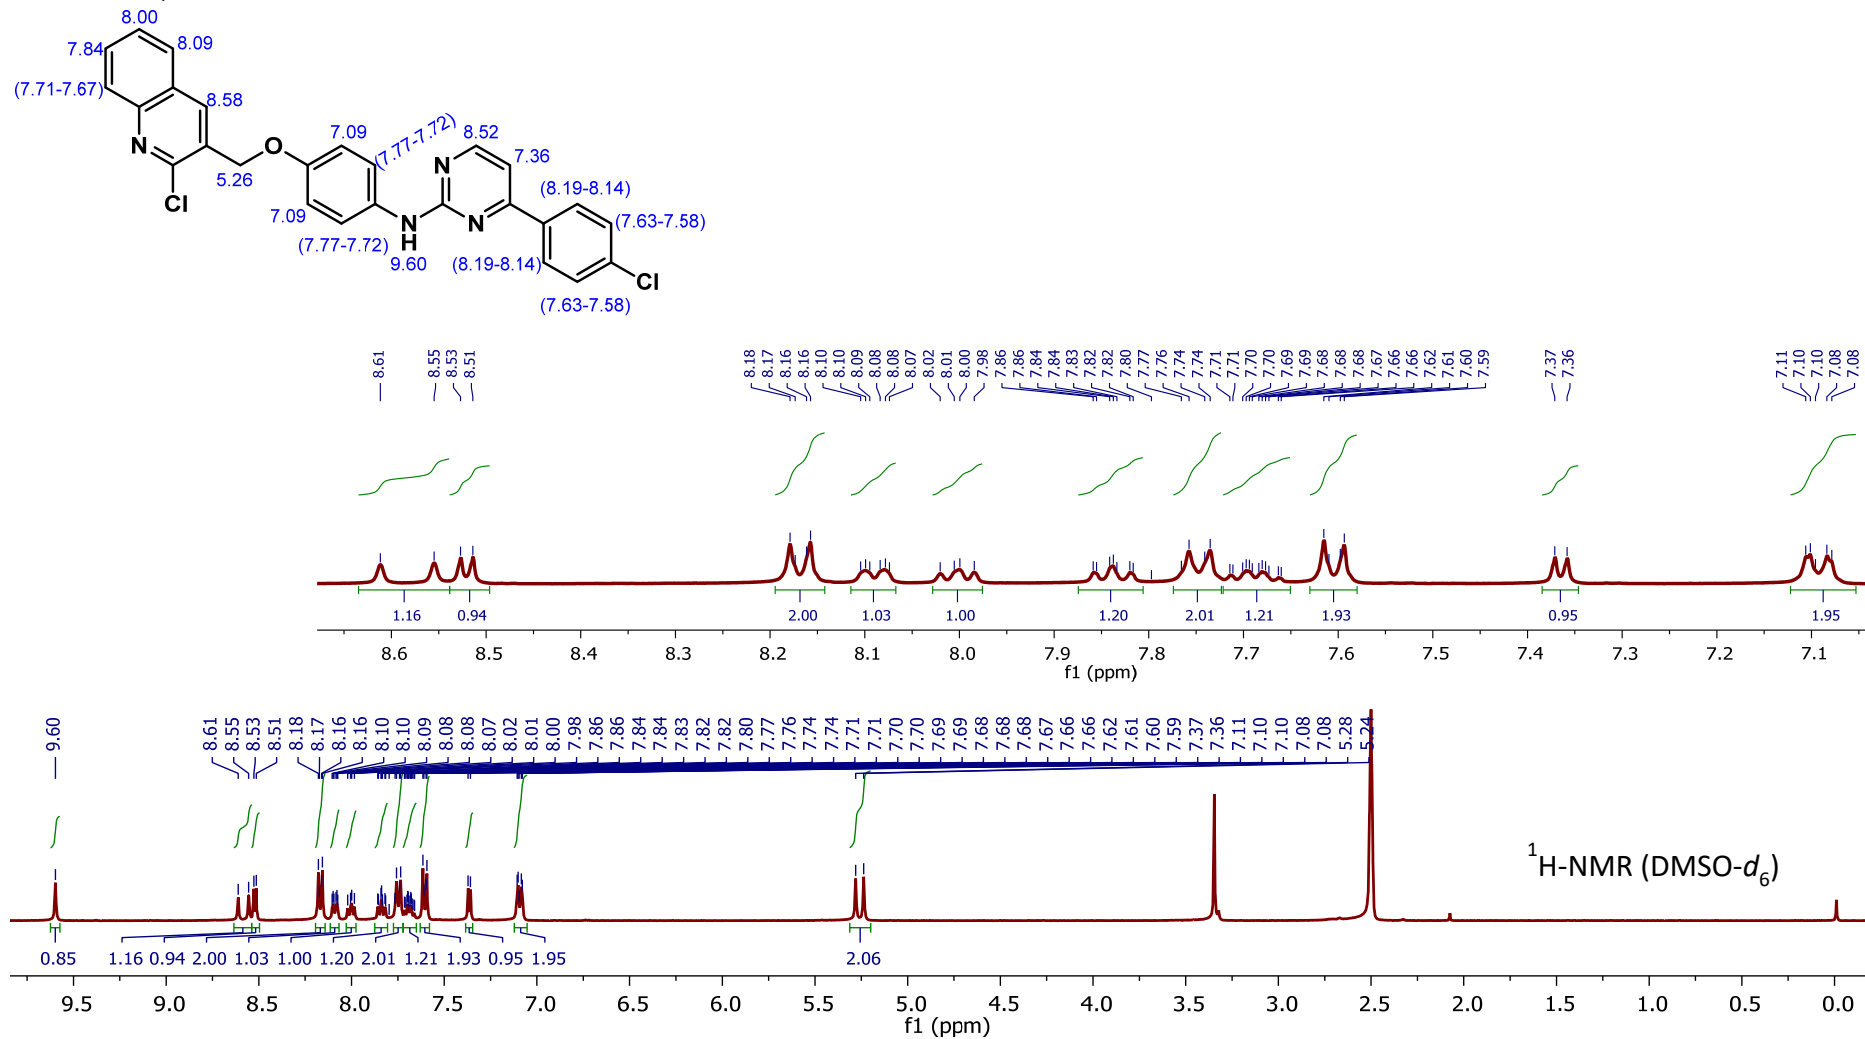

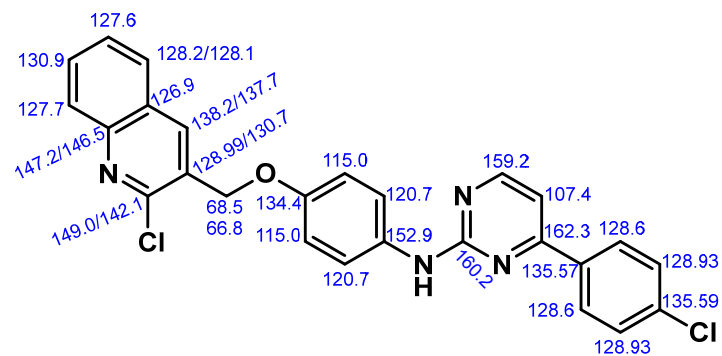

DEPT-135 (DMSO- $d_6$ )

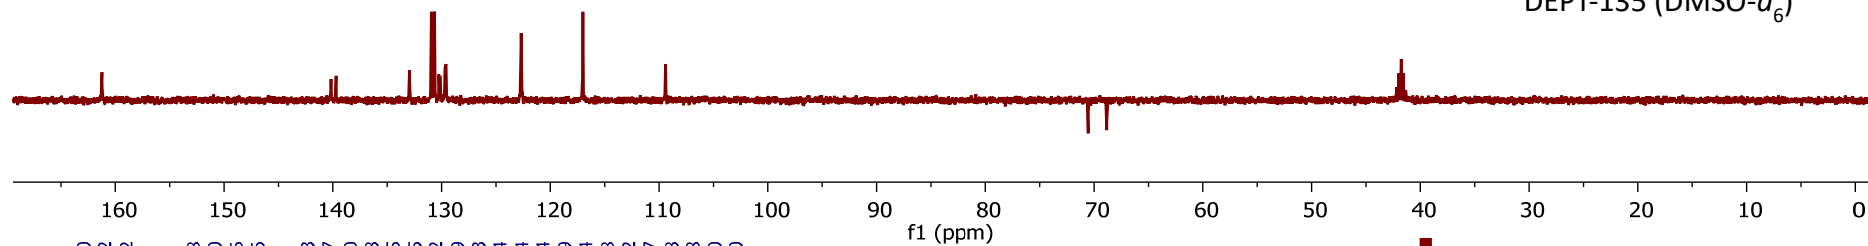

$^{13}\text{C}$ -NMR (DMSO- $d_6$ )

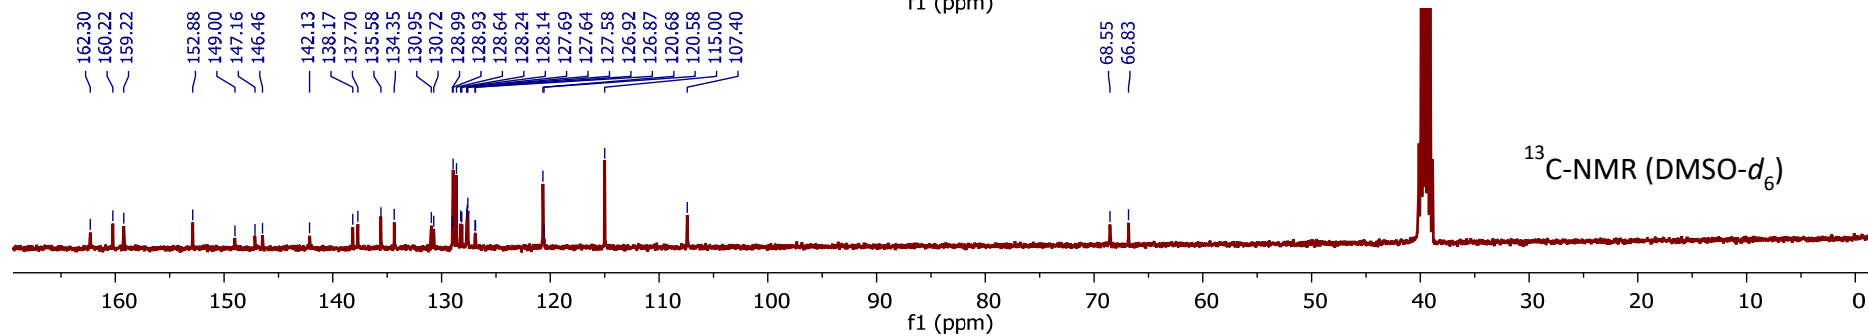

EI MS (70eV)

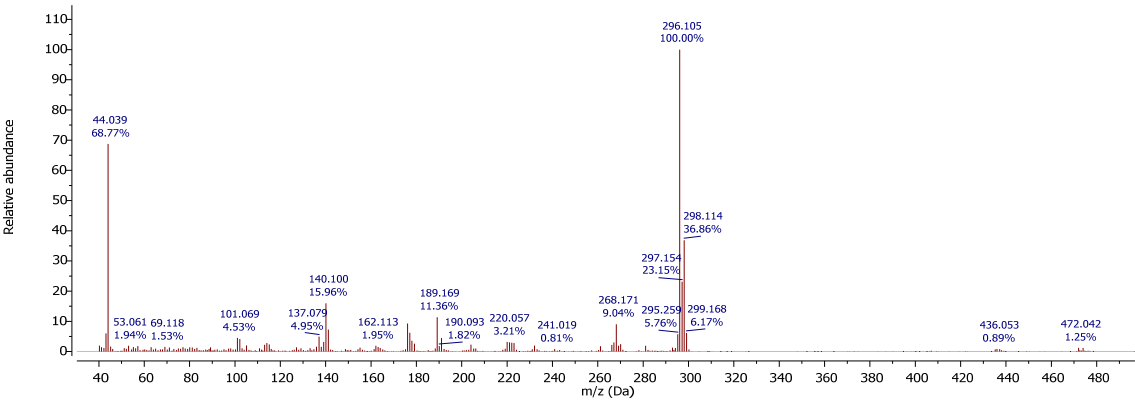

ESI-QTOF (positive ionization)

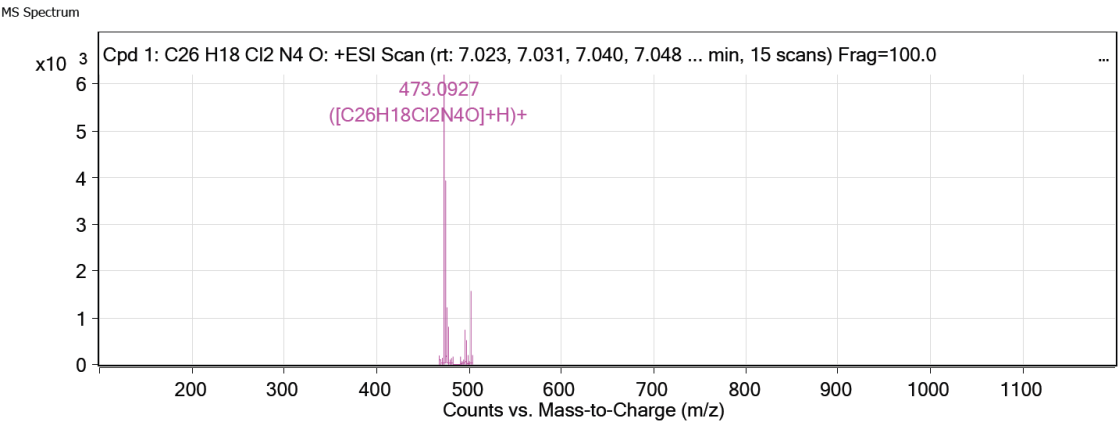

MS Spectrum Peak List

| m/z      | Calc m/z | Diff(ppm) | z | Abund   | Formula                                                          | Ion                 |
|----------|----------|-----------|---|---------|------------------------------------------------------------------|---------------------|
| 473.0927 | 473.093  | 0.76      | 1 | 6219.32 | C <sub>26</sub> H <sub>18</sub> Cl <sub>2</sub> N <sub>4</sub> O | (M+H) <sup>+</sup>  |
| 474.0961 | 474.0961 | 0.12      | 1 | 1828.22 | C <sub>26</sub> H <sub>18</sub> Cl <sub>2</sub> N <sub>4</sub> O | (M+H) <sup>+</sup>  |
| 475.0904 | 475.0907 | 0.57      | 1 | 4097    | C <sub>26</sub> H <sub>18</sub> Cl <sub>2</sub> N <sub>4</sub> O | (M+H) <sup>+</sup>  |
| 476.0932 | 476.0934 | 0.26      | 1 | 1239.43 | C <sub>26</sub> H <sub>18</sub> Cl <sub>2</sub> N <sub>4</sub> O | (M+H) <sup>+</sup>  |
| 477.09   | 477.0892 | -1.84     | 1 | 857.27  | C <sub>26</sub> H <sub>18</sub> Cl <sub>2</sub> N <sub>4</sub> O | (M+H) <sup>+</sup>  |
| 478.0927 | 478.091  | -3.67     | 1 | 181.88  | C <sub>26</sub> H <sub>18</sub> Cl <sub>2</sub> N <sub>4</sub> O | (M+H) <sup>+</sup>  |
| 495.0751 | 495.075  | -0.15     | 1 | 756.54  | C <sub>26</sub> H <sub>18</sub> Cl <sub>2</sub> N <sub>4</sub> O | (M+Na) <sup>+</sup> |
| 496.0769 | 496.0781 | 2.29      | 1 | 195.74  | C <sub>26</sub> H <sub>18</sub> Cl <sub>2</sub> N <sub>4</sub> O | (M+Na) <sup>+</sup> |
| 497.0737 | 497.0726 | -2.1      | 1 | 510.59  | C <sub>26</sub> H <sub>18</sub> Cl <sub>2</sub> N <sub>4</sub> O | (M+Na) <sup>+</sup> |
| 499.0814 | 499.0711 | -20.67    | 1 | 153.04  | C <sub>26</sub> H <sub>18</sub> Cl <sub>2</sub> N <sub>4</sub> O | (M+Na) <sup>+</sup> |

## 4.2 Compound 9

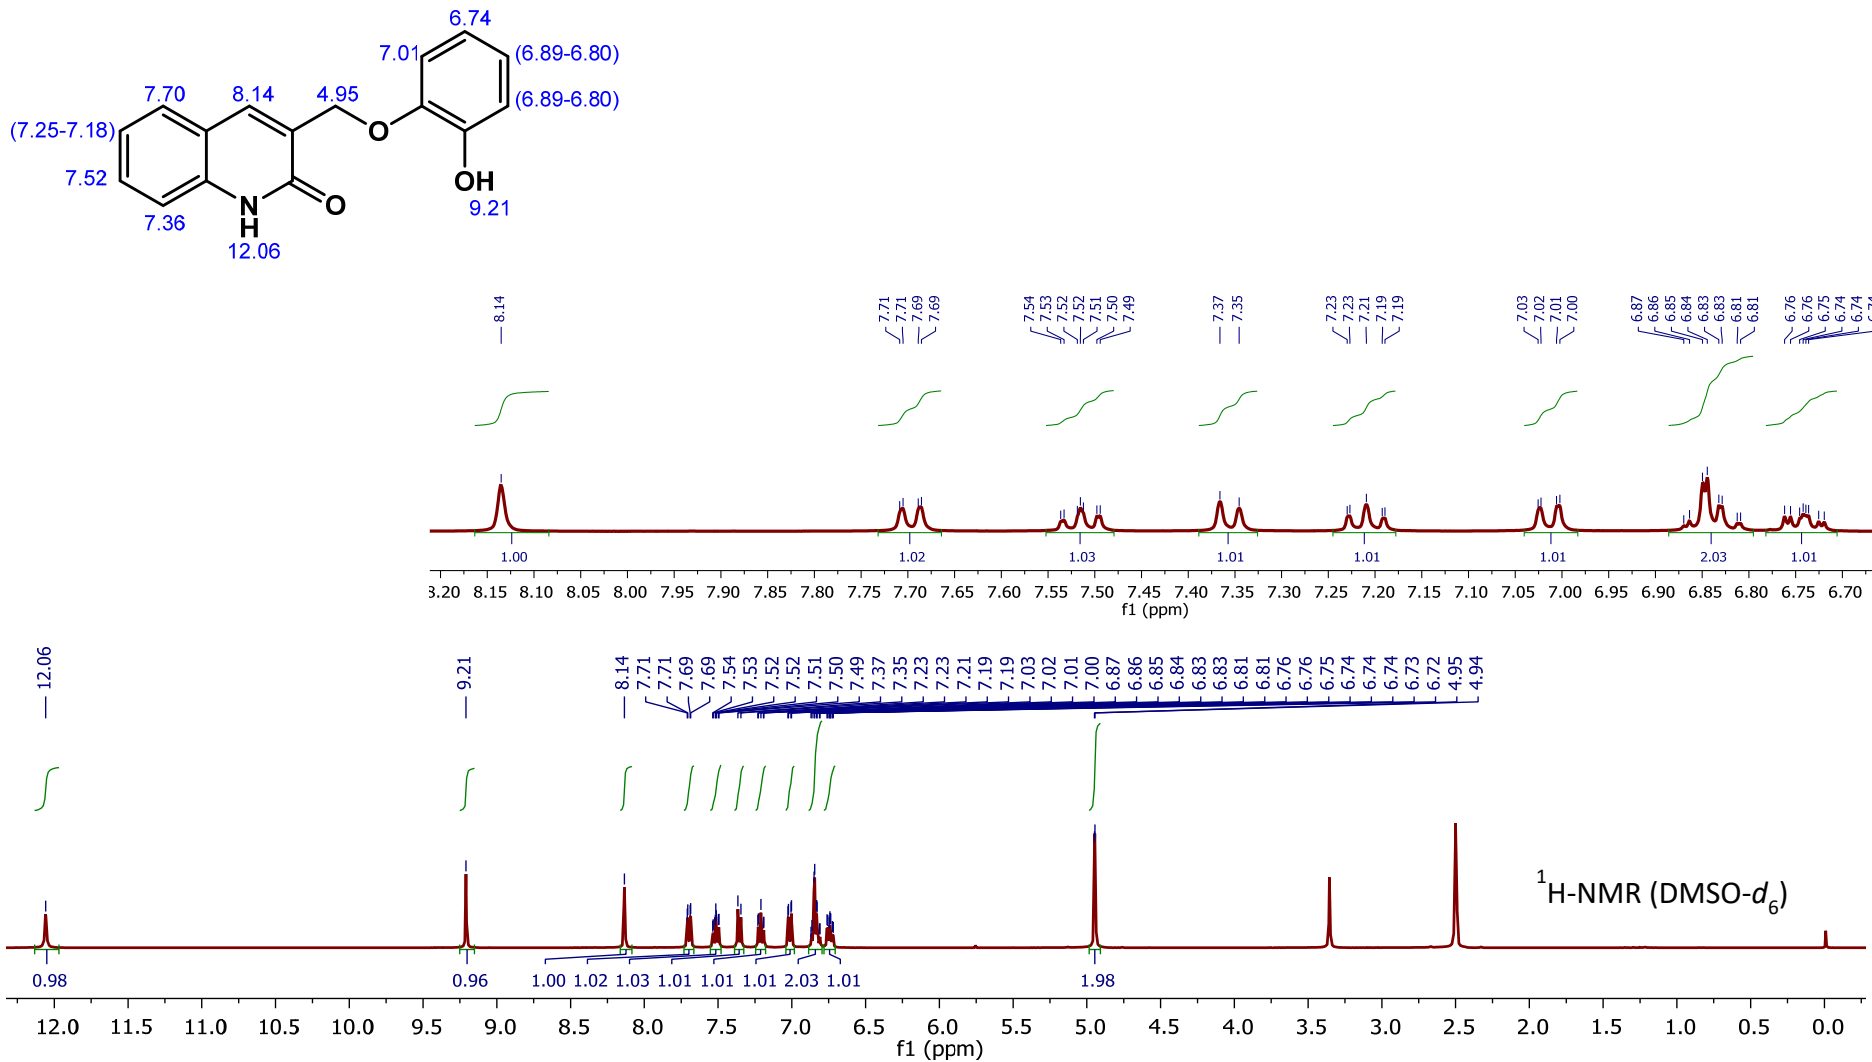

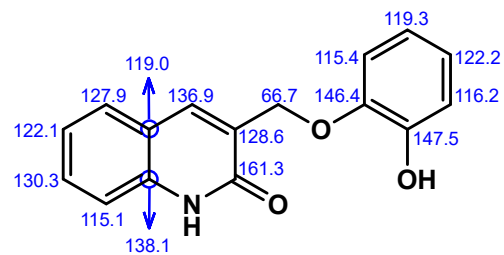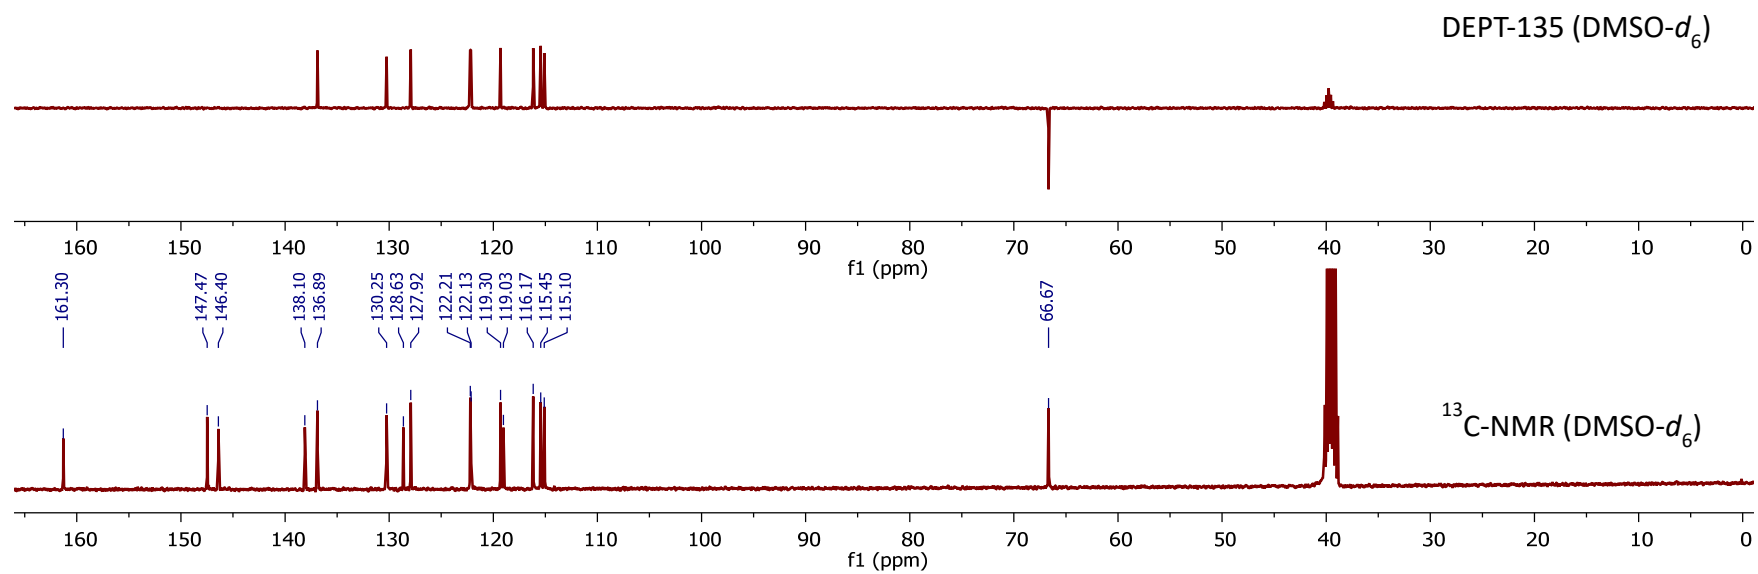

EI MS (70eV)

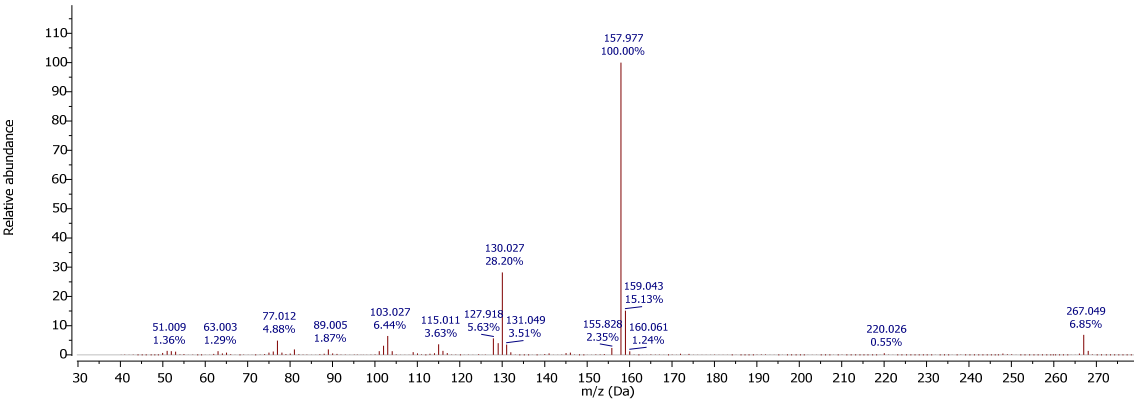

ESI-QTOF (positive ionization)

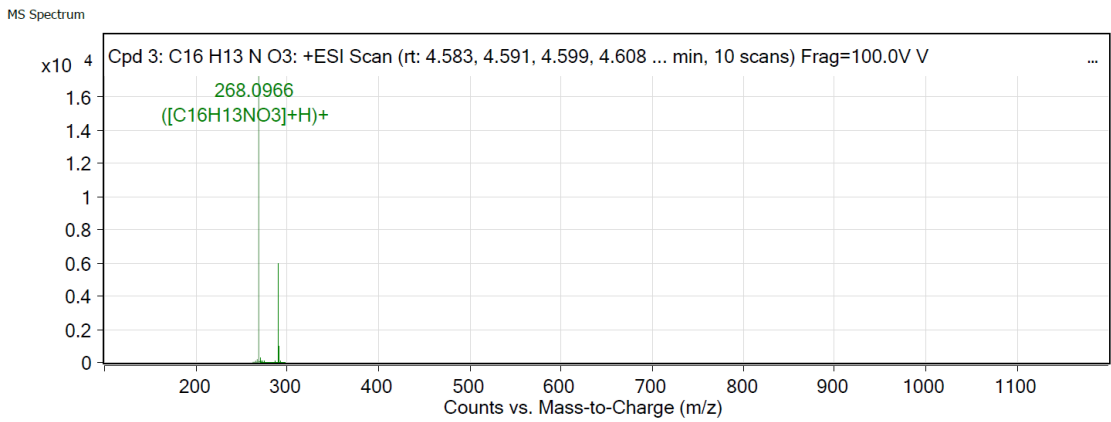

MS Spectrum Peak List

| m/z      | Calc m/z | Diff(ppm) | z | Abund    | Formula                                         | Ion     |
|----------|----------|-----------|---|----------|-------------------------------------------------|---------|
| 267.088  | 267.089  | 3.55      | 1 | 127.47   | C <sub>16</sub> H <sub>13</sub> NO <sub>3</sub> | M+      |
| 268.0966 | 268.0968 | 0.73      | 1 | 17277.36 | C <sub>16</sub> H <sub>13</sub> NO <sub>3</sub> | (M+H)+  |
| 269.1    | 269.1001 | 0.37      | 1 | 3074.52  | C <sub>16</sub> H <sub>13</sub> NO <sub>3</sub> | (M+H)+  |
| 270.1029 | 270.1027 | -0.75     | 1 | 357.6    | C <sub>16</sub> H <sub>13</sub> NO <sub>3</sub> | (M+H)+  |
| 290.0779 | 290.0788 | 2.93      | 1 | 6088.36  | C <sub>16</sub> H <sub>13</sub> NO <sub>3</sub> | (M+Na)+ |
| 291.0816 | 291.082  | 1.48      | 1 | 1041.68  | C <sub>16</sub> H <sub>13</sub> NO <sub>3</sub> | (M+Na)+ |
| 292.082  | 292.0846 | 9.11      | 1 | 89.78    | C <sub>16</sub> H <sub>13</sub> NO <sub>3</sub> | (M+Na)+ |

# 4.3 Compound 15

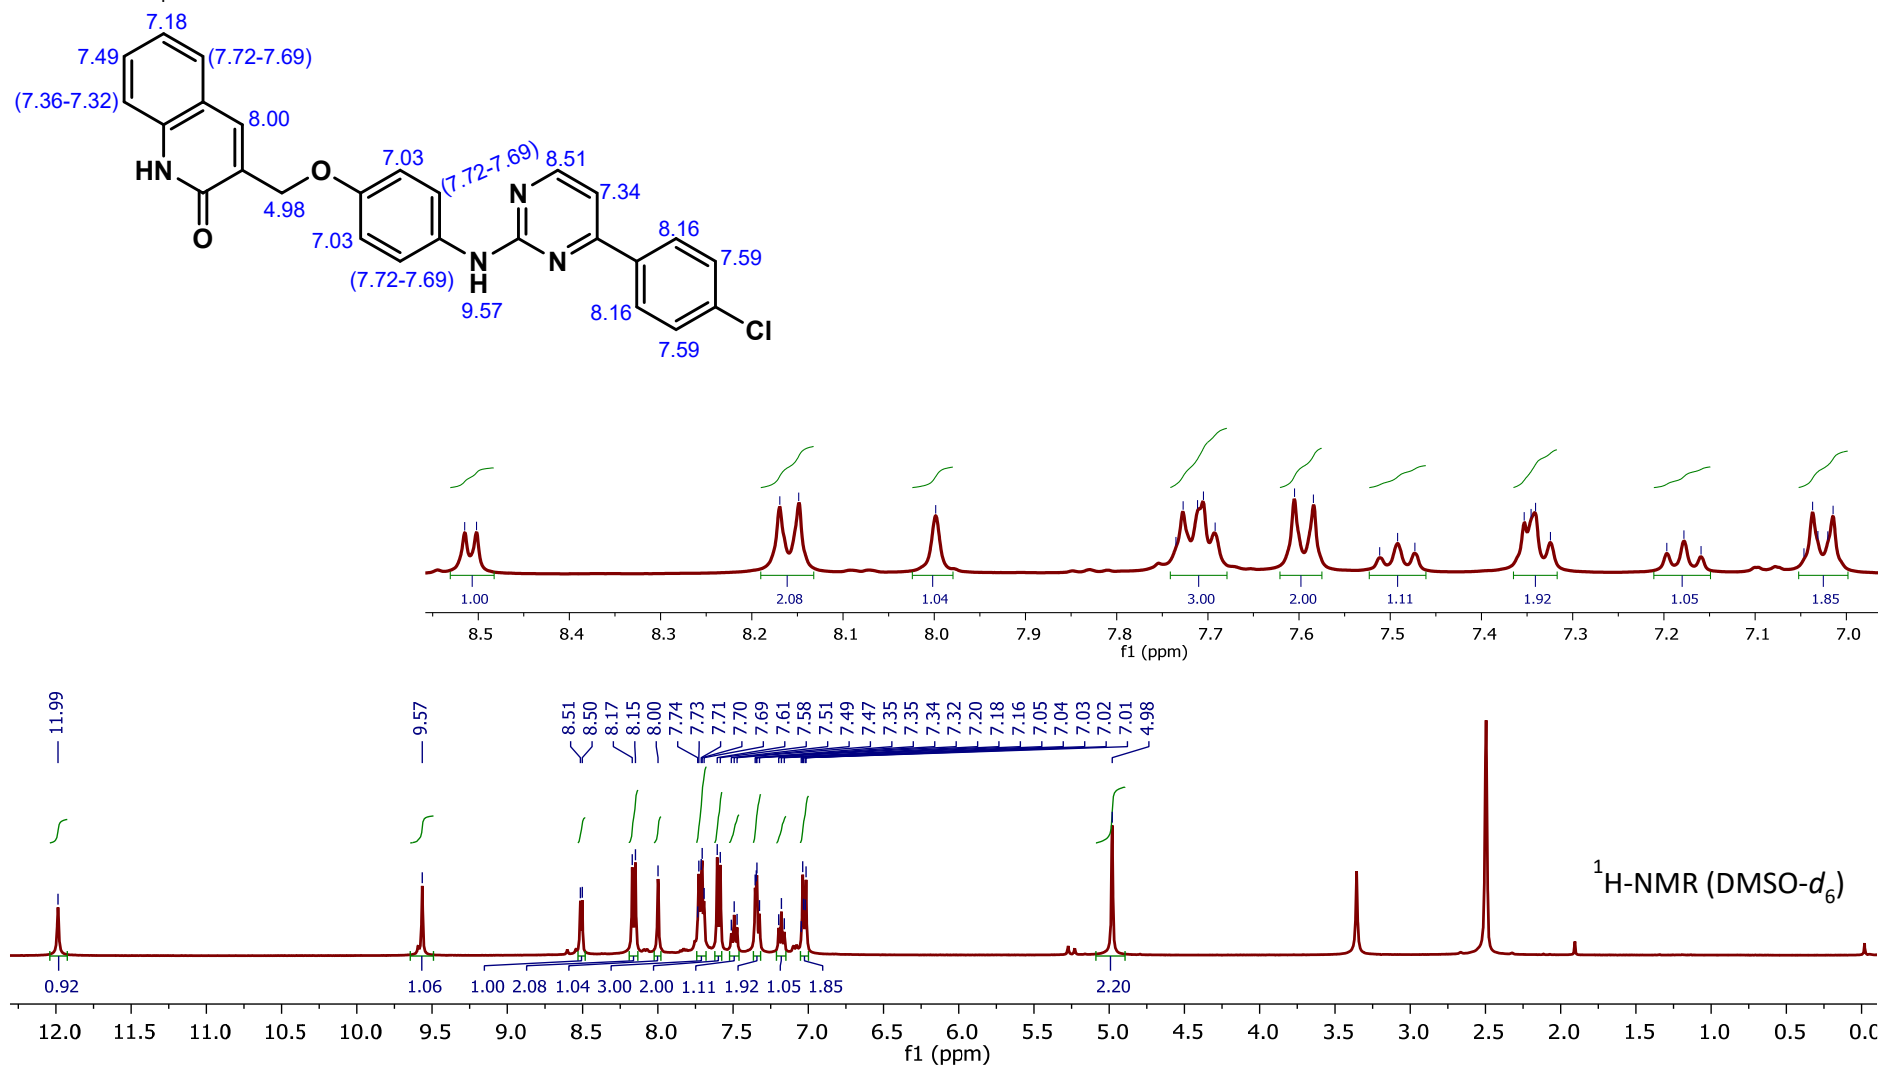



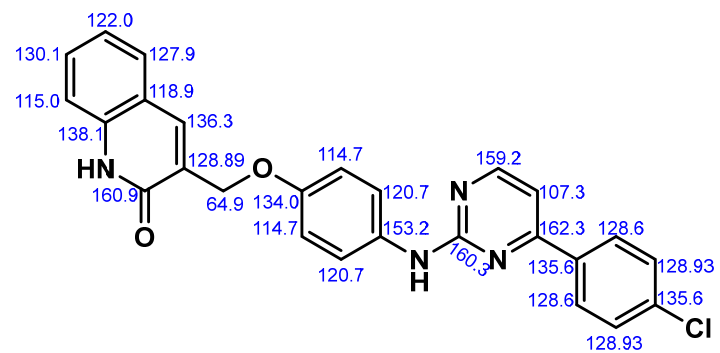

DEPT-135 (DMSO- $d_6$ )

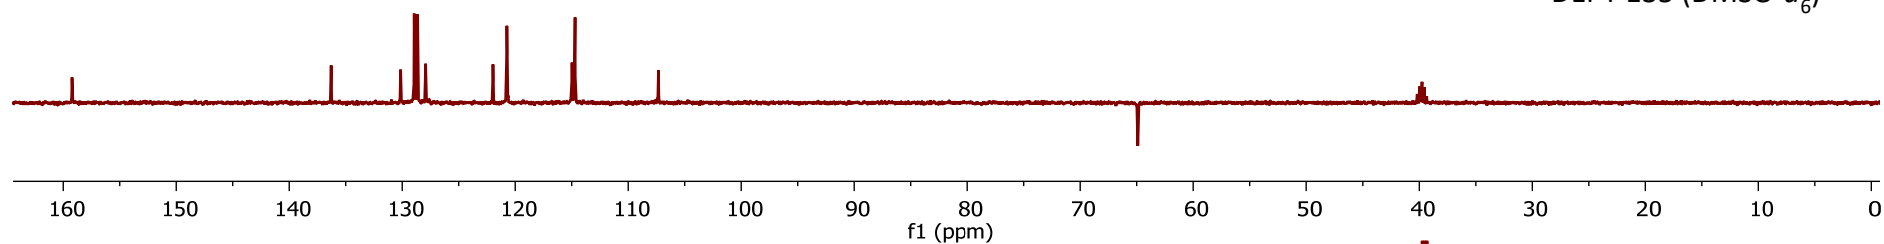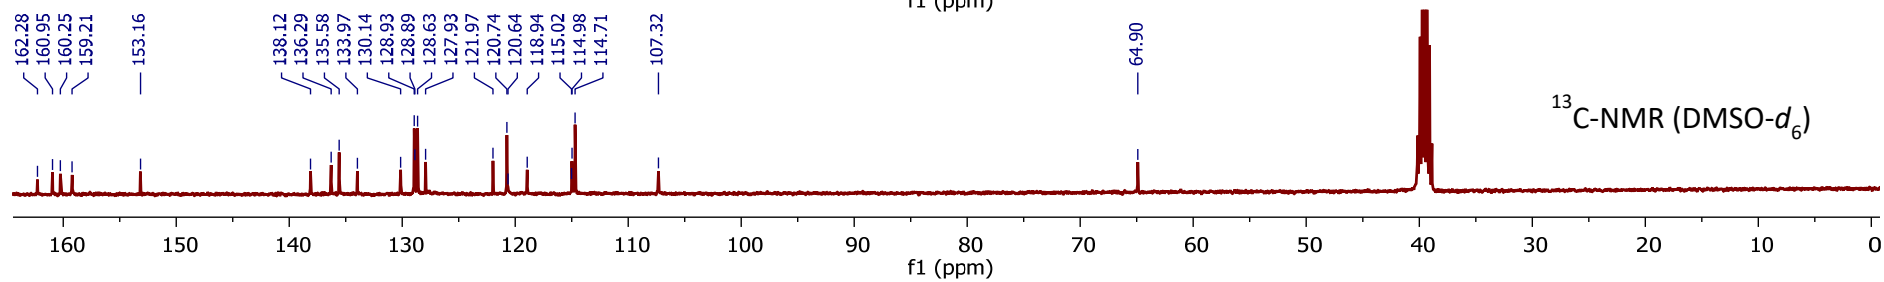

## EI MS (70eV)

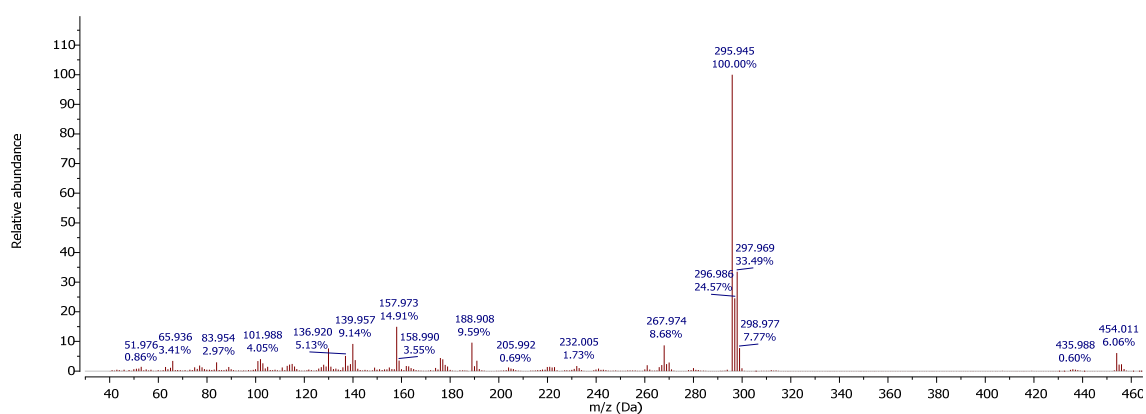

## ESI-QTOF (positive ionization)

MS Spectrum

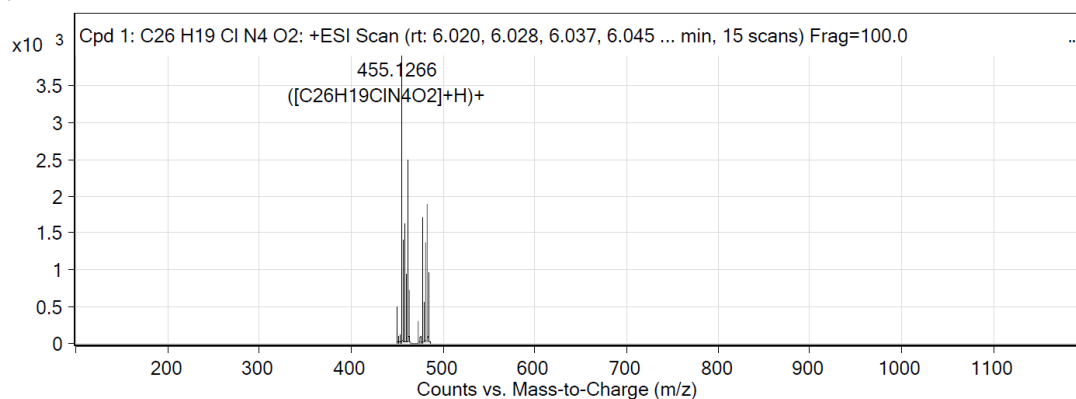

### MS Spectrum Peak List

| m/z      | Calc m/z | Diff(ppm) | z | Abund   | Formula                                                         | Ion                 |
|----------|----------|-----------|---|---------|-----------------------------------------------------------------|---------------------|
| 455.1266 | 455.1269 | 0.7       | 1 | 3951.15 | C <sub>26</sub> H <sub>19</sub> ClN <sub>4</sub> O <sub>2</sub> | (M+H) <sup>+</sup>  |
| 456.1289 | 456.13   | 2.41      | 1 | 1176.77 | C <sub>26</sub> H <sub>19</sub> ClN <sub>4</sub> O <sub>2</sub> | (M+H) <sup>+</sup>  |
| 457.1247 | 457.1251 | 0.9       | 1 | 1488.47 | C <sub>26</sub> H <sub>19</sub> ClN <sub>4</sub> O <sub>2</sub> | (M+H) <sup>+</sup>  |
| 458.1277 | 458.1275 | -0.53     | 1 | 395.03  | C <sub>26</sub> H <sub>19</sub> ClN <sub>4</sub> O <sub>2</sub> | (M+H) <sup>+</sup>  |
| 459.1327 | 459.1302 | -5.56     | 1 | 40.66   | C <sub>26</sub> H <sub>19</sub> ClN <sub>4</sub> O <sub>2</sub> | (M+H) <sup>+</sup>  |
| 477.1082 | 477.1089 | 1.34      | 1 | 1772.62 | C <sub>26</sub> H <sub>19</sub> ClN <sub>4</sub> O <sub>2</sub> | (M+Na) <sup>+</sup> |
| 478.1116 | 478.1119 | 0.66      | 1 | 450.63  | C <sub>26</sub> H <sub>19</sub> ClN <sub>4</sub> O <sub>2</sub> | (M+Na) <sup>+</sup> |
| 479.1066 | 479.1071 | 1.08      | 1 | 540.46  | C <sub>26</sub> H <sub>19</sub> ClN <sub>4</sub> O <sub>2</sub> | (M+Na) <sup>+</sup> |
| 480.109  | 480.1094 | 0.9       | 1 | 127.29  | C <sub>26</sub> H <sub>19</sub> ClN <sub>4</sub> O <sub>2</sub> | (M+Na) <sup>+</sup> |

#### 4.4 Compound 19

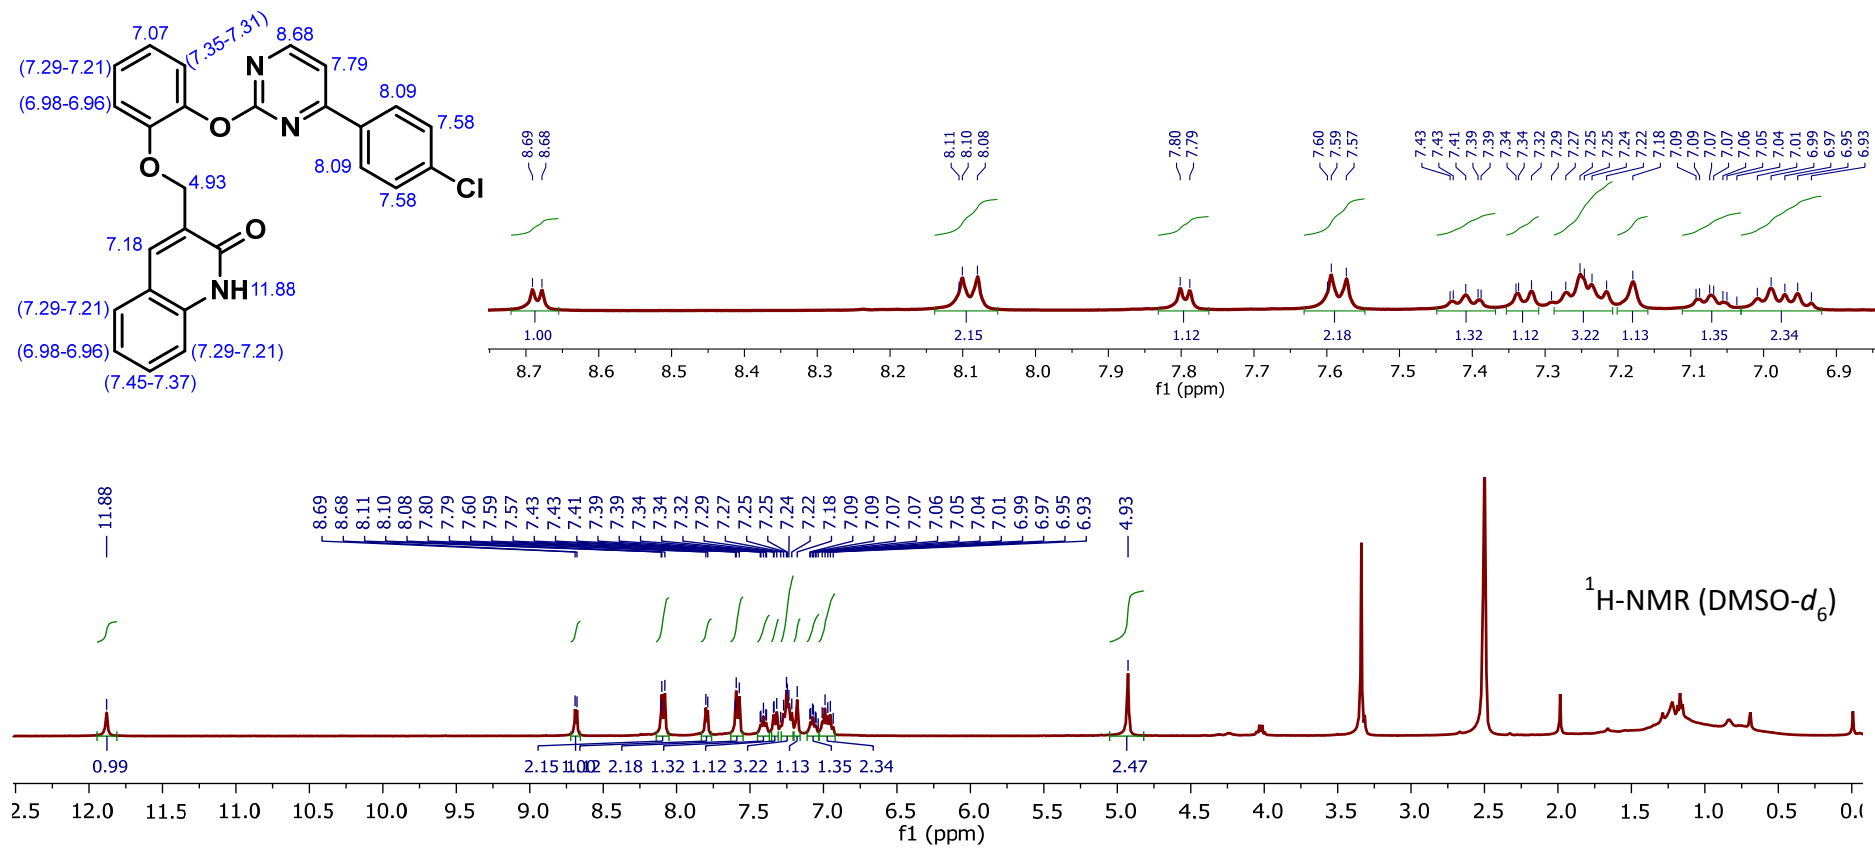

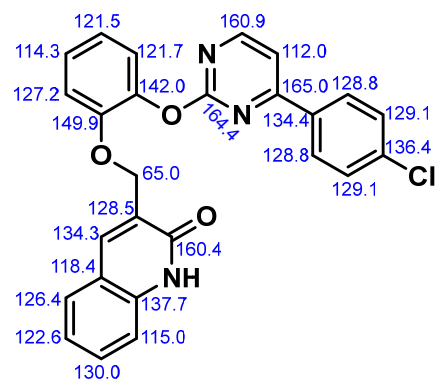

DEPT-135 (DMSO- $d_6$ )

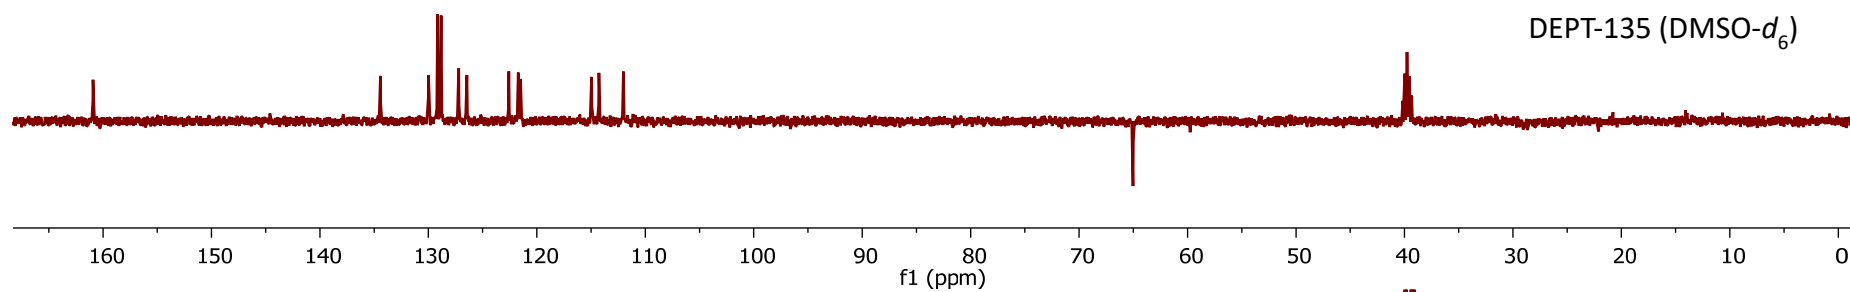

$^{13}\text{C}$ -NMR (DMSO- $d_6$ )

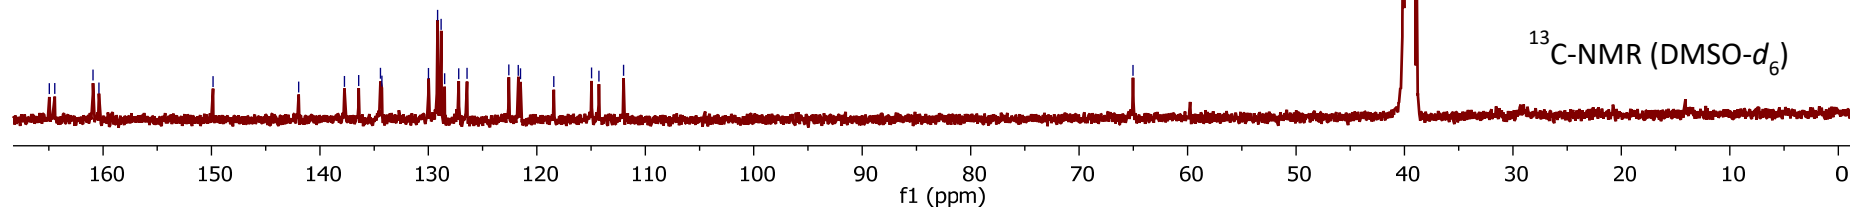

## EI MS (70eV)

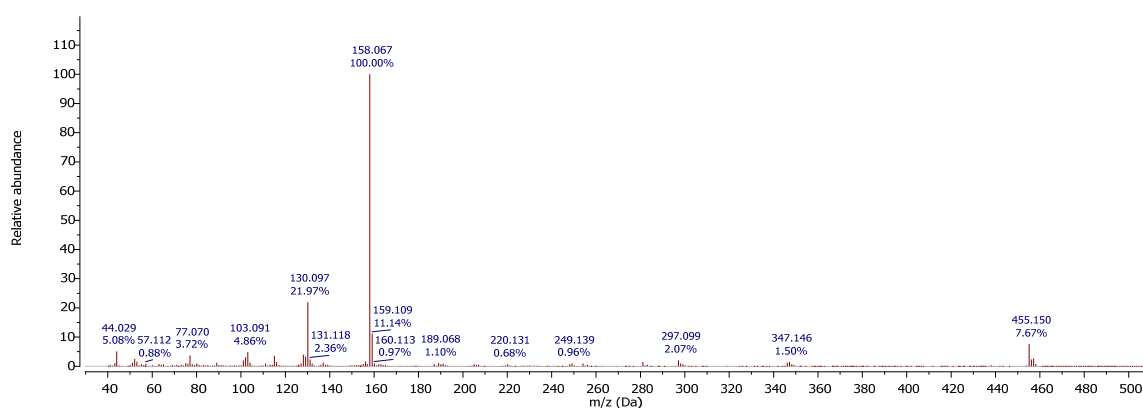

## ESI-QTOF (positive ionization)

MS Zoomed Spectrum

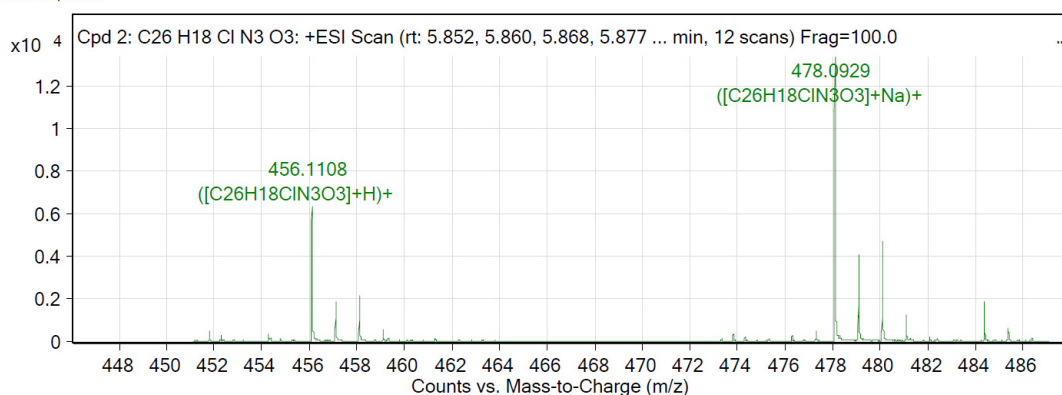

### MS Spectrum Peak List

| m/z      | Calc m/z | Diff(ppm) | z | Abund    | Formula                                                         | Ion     |
|----------|----------|-----------|---|----------|-----------------------------------------------------------------|---------|
| 456.1108 | 456.1109 | 0.21      | 1 | 6375.96  | C <sub>26</sub> H <sub>18</sub> CIN <sub>3</sub> O <sub>3</sub> | (M+H)+  |
| 457.1138 | 457.1141 | 0.65      | 1 | 1920.26  | C <sub>26</sub> H <sub>18</sub> CIN <sub>3</sub> O <sub>3</sub> | (M+H)+  |
| 458.1088 | 458.1092 | 0.86      | 1 | 2208.63  | C <sub>26</sub> H <sub>18</sub> CIN <sub>3</sub> O <sub>3</sub> | (M+H)+  |
| 459.1117 | 459.1116 | -0.2      | 1 | 576.29   | C <sub>26</sub> H <sub>18</sub> CIN <sub>3</sub> O <sub>3</sub> | (M+H)+  |
| 460.1171 | 460.1143 | -6.16     | 1 | 20.83    | C <sub>26</sub> H <sub>18</sub> CIN <sub>3</sub> O <sub>3</sub> | (M+H)+  |
| 478.0929 | 478.0929 | -0.05     | 1 | 13461.33 | C <sub>26</sub> H <sub>18</sub> CIN <sub>3</sub> O <sub>3</sub> | (M+Na)+ |
| 479.0956 | 479.096  | 0.83      | 1 | 4169.89  | C <sub>26</sub> H <sub>18</sub> CIN <sub>3</sub> O <sub>3</sub> | (M+Na)+ |
| 480.091  | 480.0911 | 0.23      | 1 | 4700.13  | C <sub>26</sub> H <sub>18</sub> CIN <sub>3</sub> O <sub>3</sub> | (M+Na)+ |
| 481.0925 | 481.0936 | 2.24      | 1 | 1299.51  | C <sub>26</sub> H <sub>18</sub> CIN <sub>3</sub> O <sub>3</sub> | (M+Na)+ |
| 482.0944 | 482.0962 | 3.73      | 1 | 194.51   | C <sub>26</sub> H <sub>18</sub> CIN <sub>3</sub> O <sub>3</sub> | (M+Na)+ |

# 4.5 Compound 22a

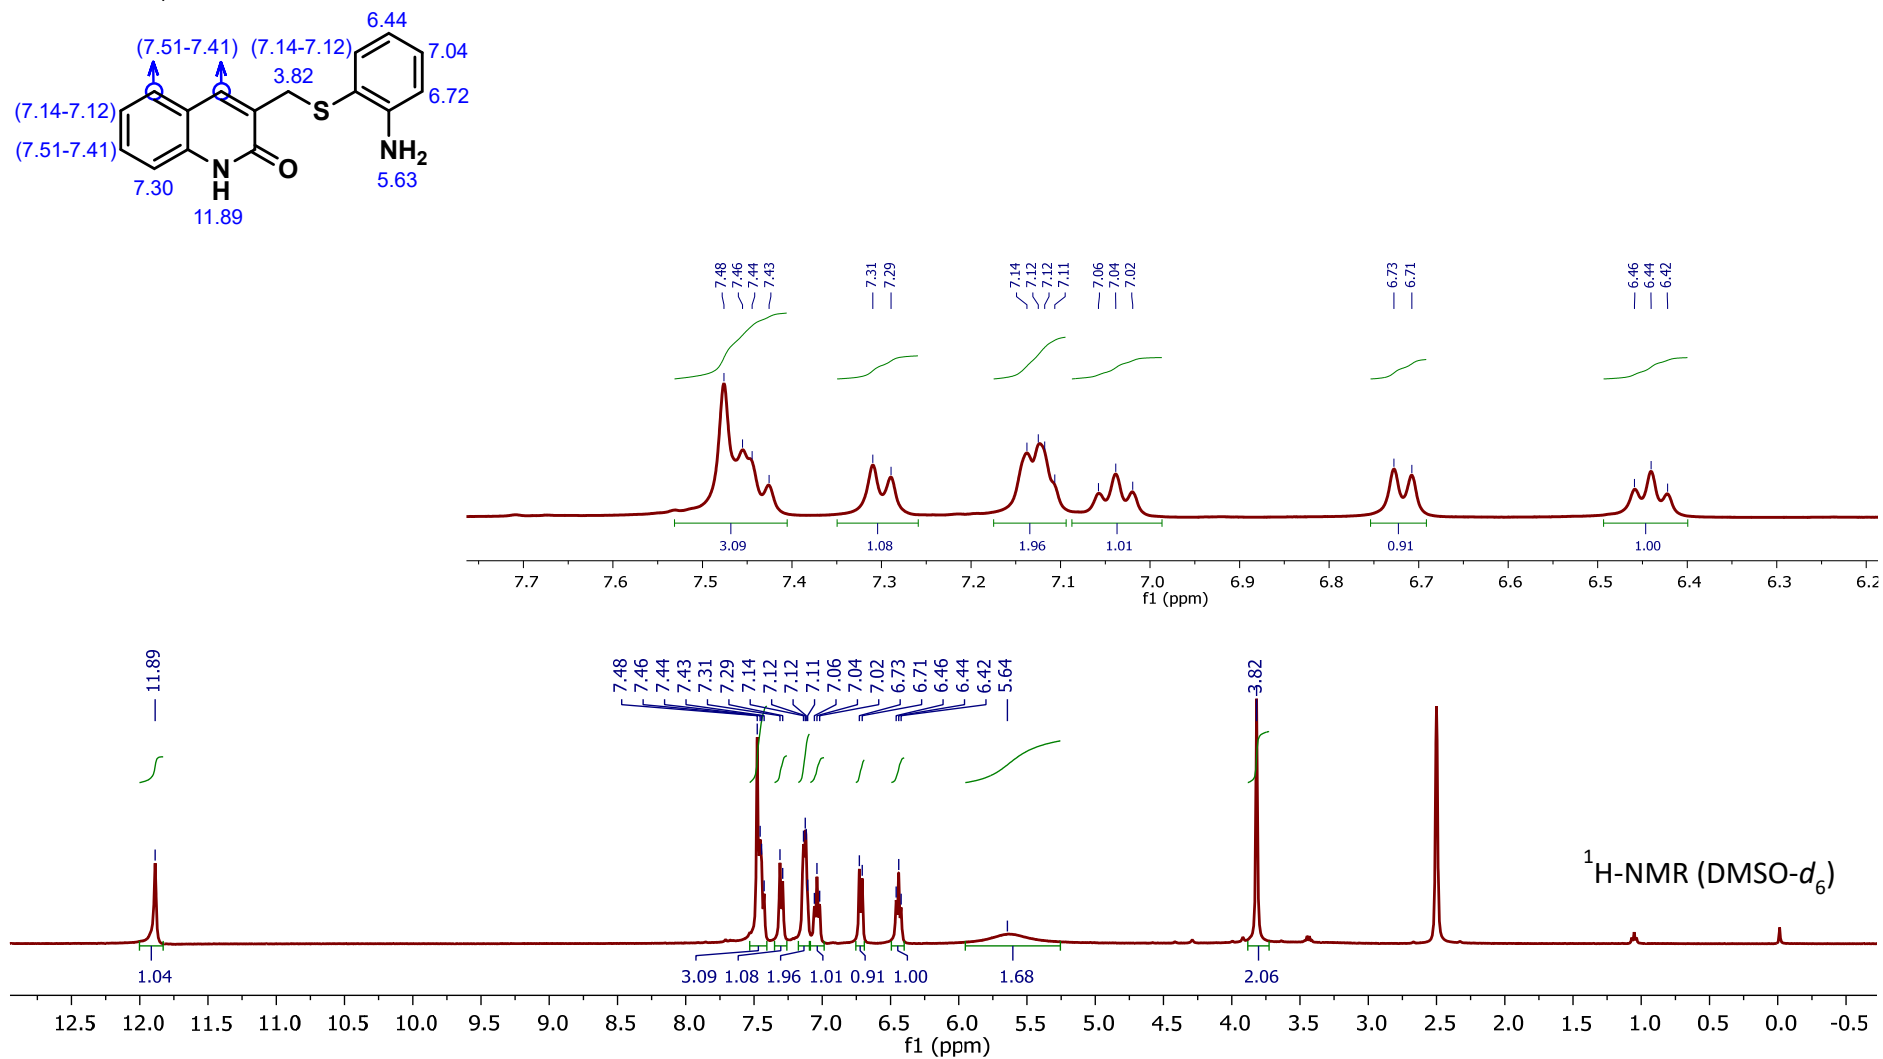

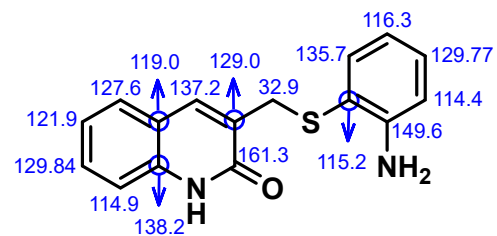

DEPT-135 ( $\text{DMSO}-d_6$ )

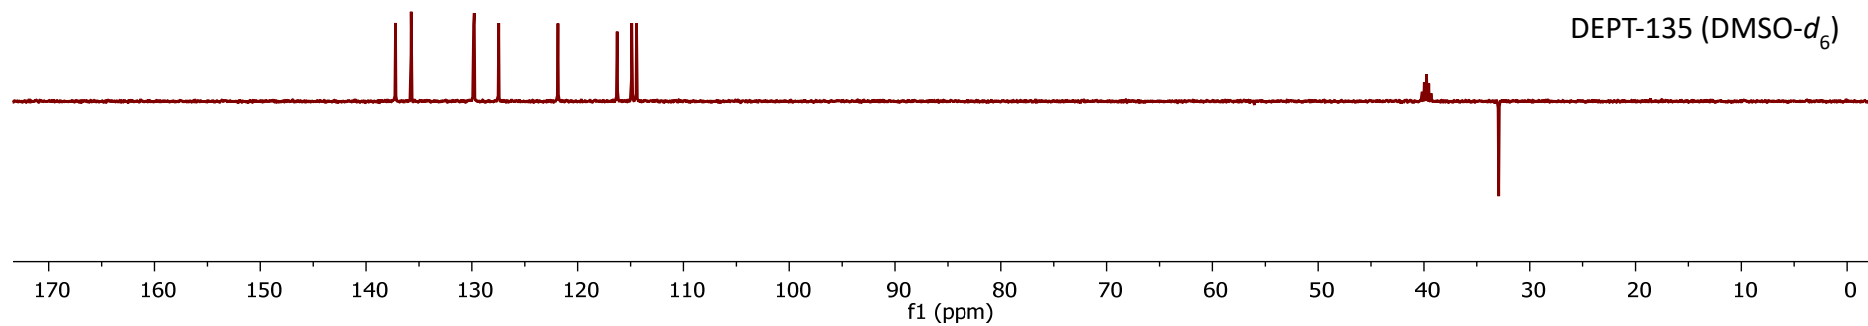

$^{13}\text{C}$ -NMR ( $\text{DMSO}-d_6$ )

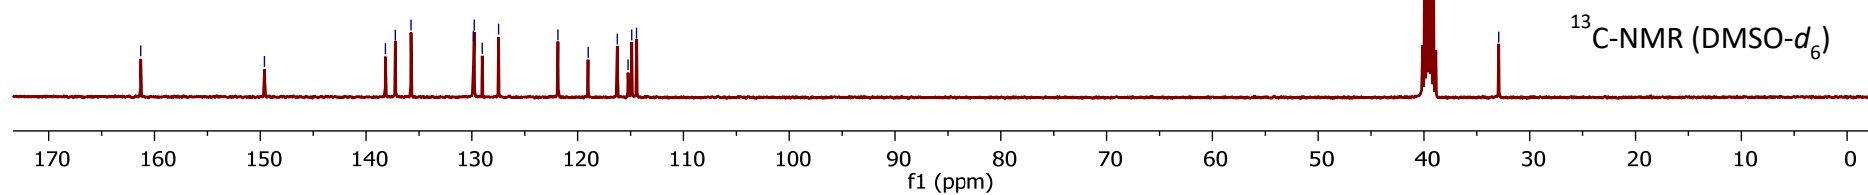

## EI MS (70eV)

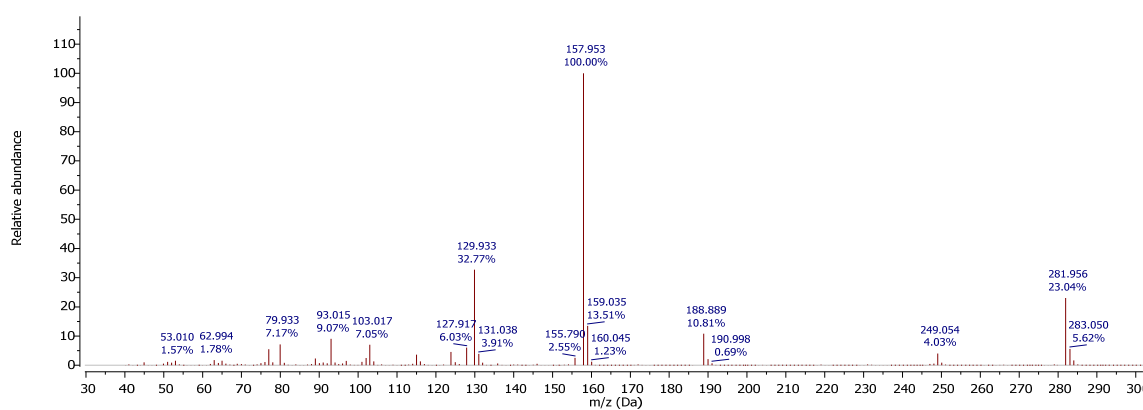

## ESI-QTOF (positive ionization)

MS Zoomed Spectrum

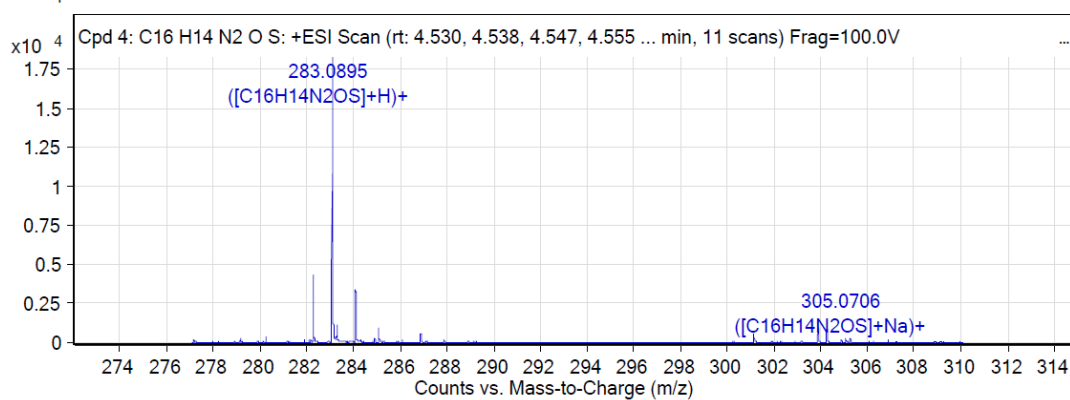

## MS Spectrum Peak List

| m/z      | Calc m/z | Diff(ppm) | z | Abund   | Formula    | Ion     |
|----------|----------|-----------|---|---------|------------|---------|
| 282.0818 | 282.0821 | 1.11      | 1 | 137.98  | C16H14N2OS | M+      |
| 283.0895 | 283.09   | 1.54      | 1 | 18691.6 | C16H14N2OS | (M+H)+  |
| 284.0925 | 284.0929 | 1.36      | 1 | 3518.1  | C16H14N2OS | (M+H)+  |
| 285.0894 | 285.0887 | -2.3      | 1 | 1059.53 | C16H14N2OS | (M+H)+  |
| 305.0706 | 305.0719 | 4.29      | 1 | 309.66  | C16H14N2OS | (M+Na)+ |



4.6 Compound 22b

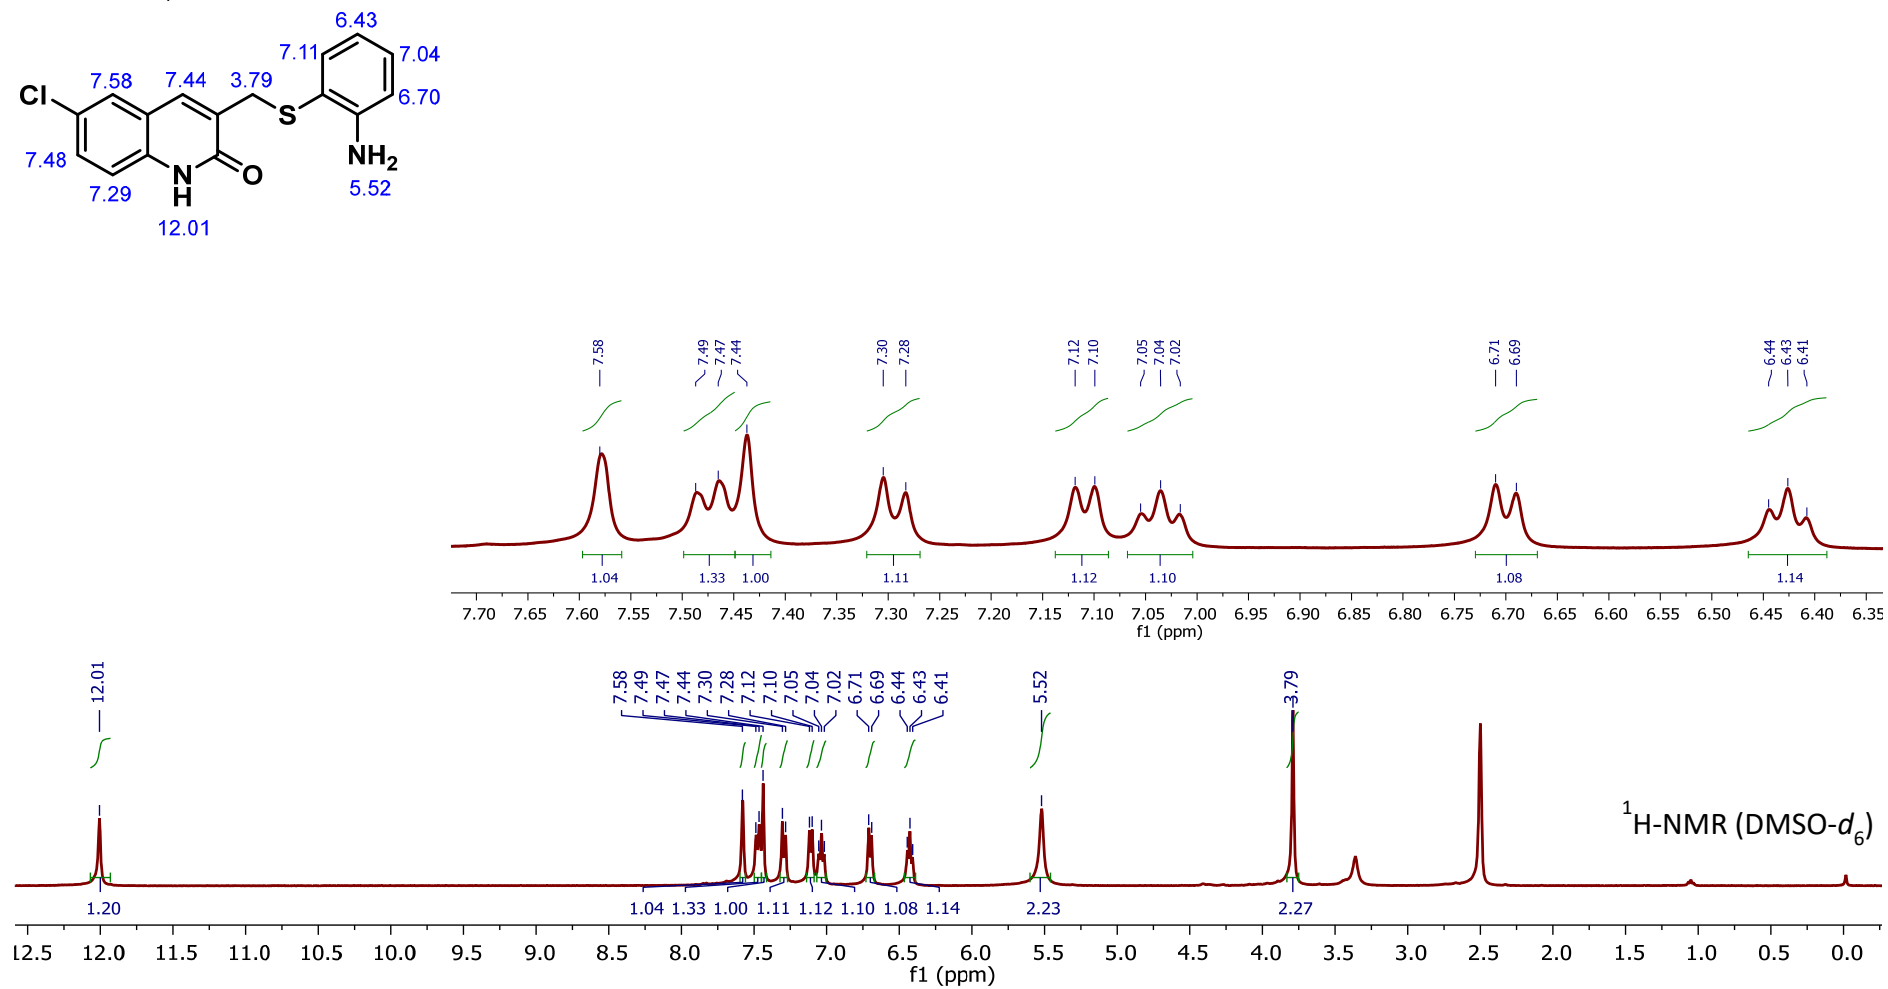

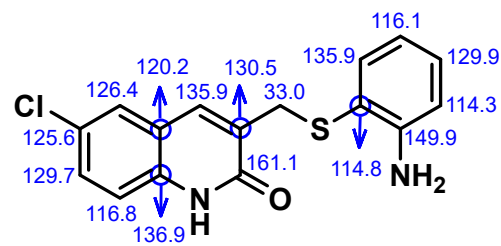

DEPT-135 ( $\text{DMSO}-d_6$ )

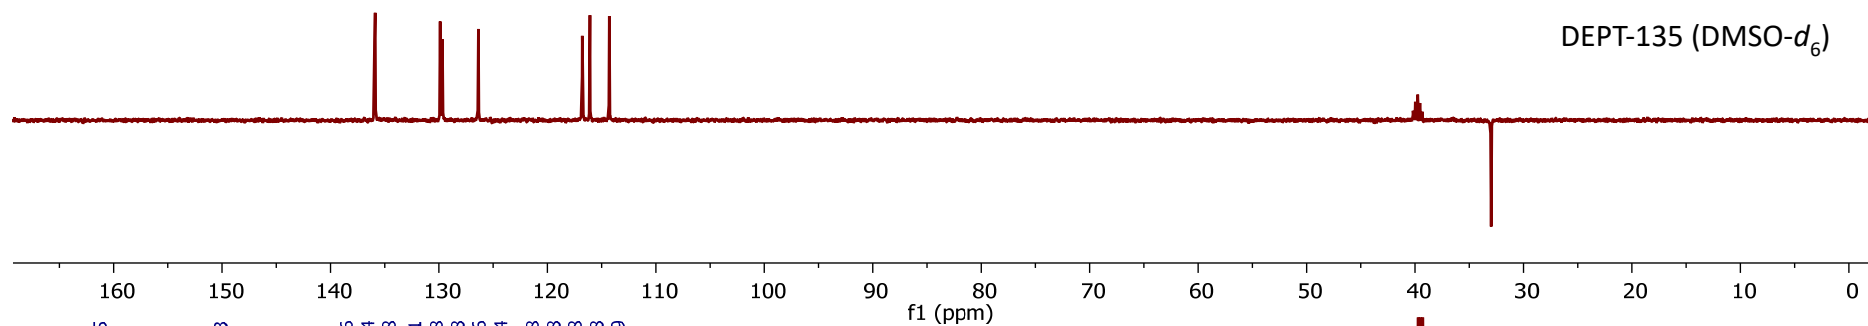

$^{13}\text{C}$ -NMR ( $\text{DMSO}-d_6$ )

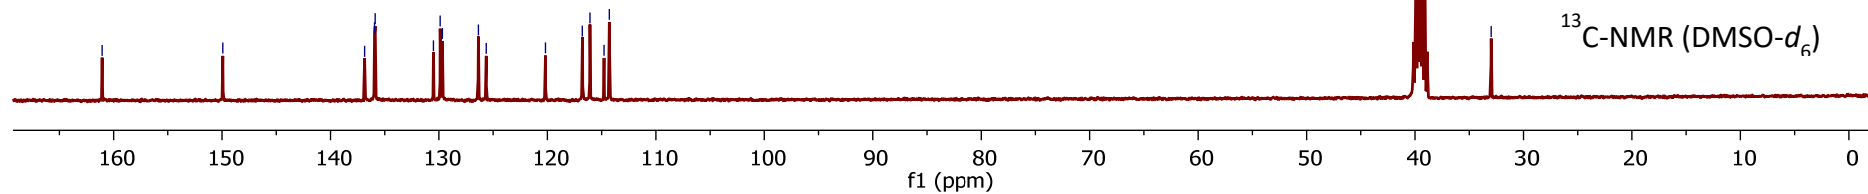

## EI MS (70eV)

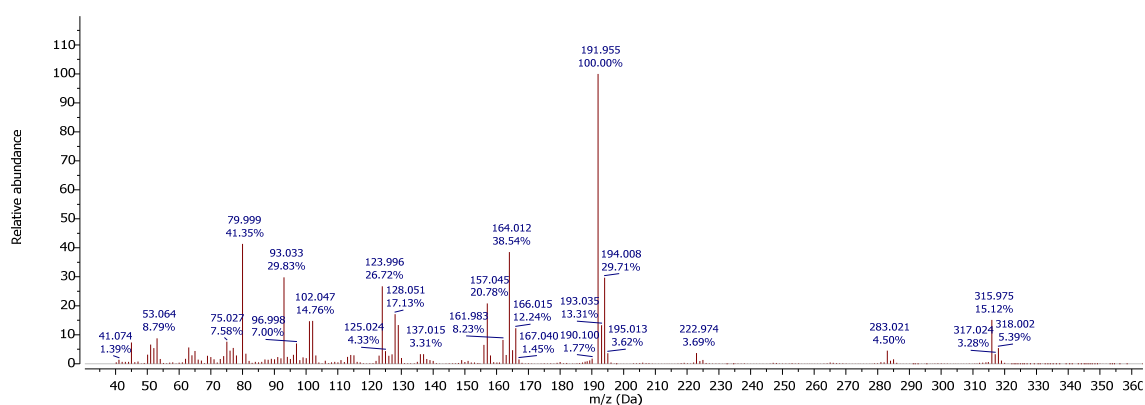

## ESI-QTOF (positive ionization)

MS Spectrum

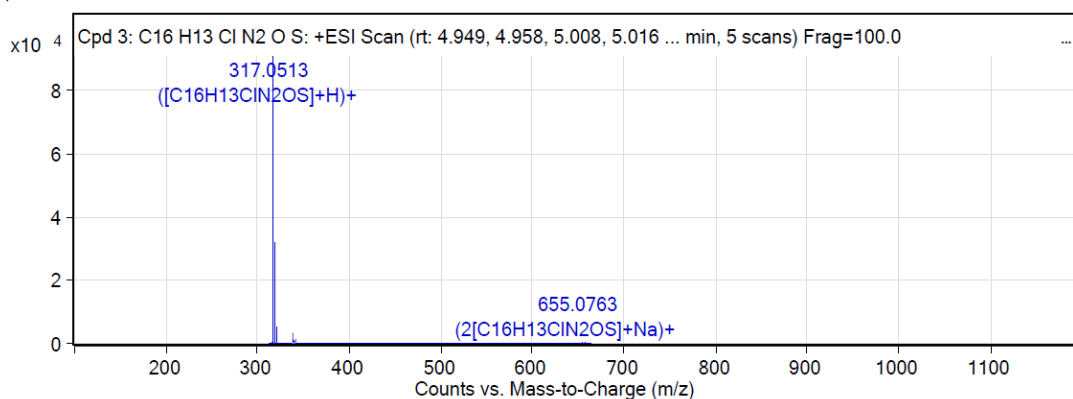

### MS Spectrum Peak List

| m/z      | Calc m/z | Diff(ppm) | z | Abund    | Formula                                             | Ion                  |
|----------|----------|-----------|---|----------|-----------------------------------------------------|----------------------|
| 317.0513 | 317.051  | -1.12     | 1 | 91054.87 | C <sub>16</sub> H <sub>13</sub> ClN <sub>2</sub> OS | (M+H) <sup>+</sup>   |
| 318.0546 | 318.054  | -1.99     | 1 | 15869.8  | C <sub>16</sub> H <sub>13</sub> ClN <sub>2</sub> OS | (M+H) <sup>+</sup>   |
| 319.0487 | 319.0483 | -1.11     | 1 | 31865.69 | C <sub>16</sub> H <sub>13</sub> ClN <sub>2</sub> OS | (M+H) <sup>+</sup>   |
| 320.051  | 320.051  | 0.26      | 1 | 5519.68  | C <sub>16</sub> H <sub>13</sub> ClN <sub>2</sub> OS | (M+H) <sup>+</sup>   |
| 321.0472 | 321.0471 | -0.25     | 1 | 1600.66  | C <sub>16</sub> H <sub>13</sub> ClN <sub>2</sub> OS | (M+H) <sup>+</sup>   |
| 339.0331 | 339.0329 | -0.36     | 1 | 3268.07  | C <sub>16</sub> H <sub>13</sub> ClN <sub>2</sub> OS | (M+Na) <sup>+</sup>  |
| 340.035  | 340.0359 | 2.52      | 1 | 831.13   | C <sub>16</sub> H <sub>13</sub> ClN <sub>2</sub> OS | (M+Na) <sup>+</sup>  |
| 341.0312 | 341.0303 | -2.87     | 1 | 1435.39  | C <sub>16</sub> H <sub>13</sub> ClN <sub>2</sub> OS | (M+Na) <sup>+</sup>  |
| 655.0763 | 655.0766 | 0.5       | 1 | 451.57   | C <sub>16</sub> H <sub>13</sub> ClN <sub>2</sub> OS | (2M+Na) <sup>+</sup> |
| 657.0732 | 657.0744 | 1.72      | 1 | 361.43   | C <sub>16</sub> H <sub>13</sub> ClN <sub>2</sub> OS | (2M+Na) <sup>+</sup> |

# 4.7 Compound 22c

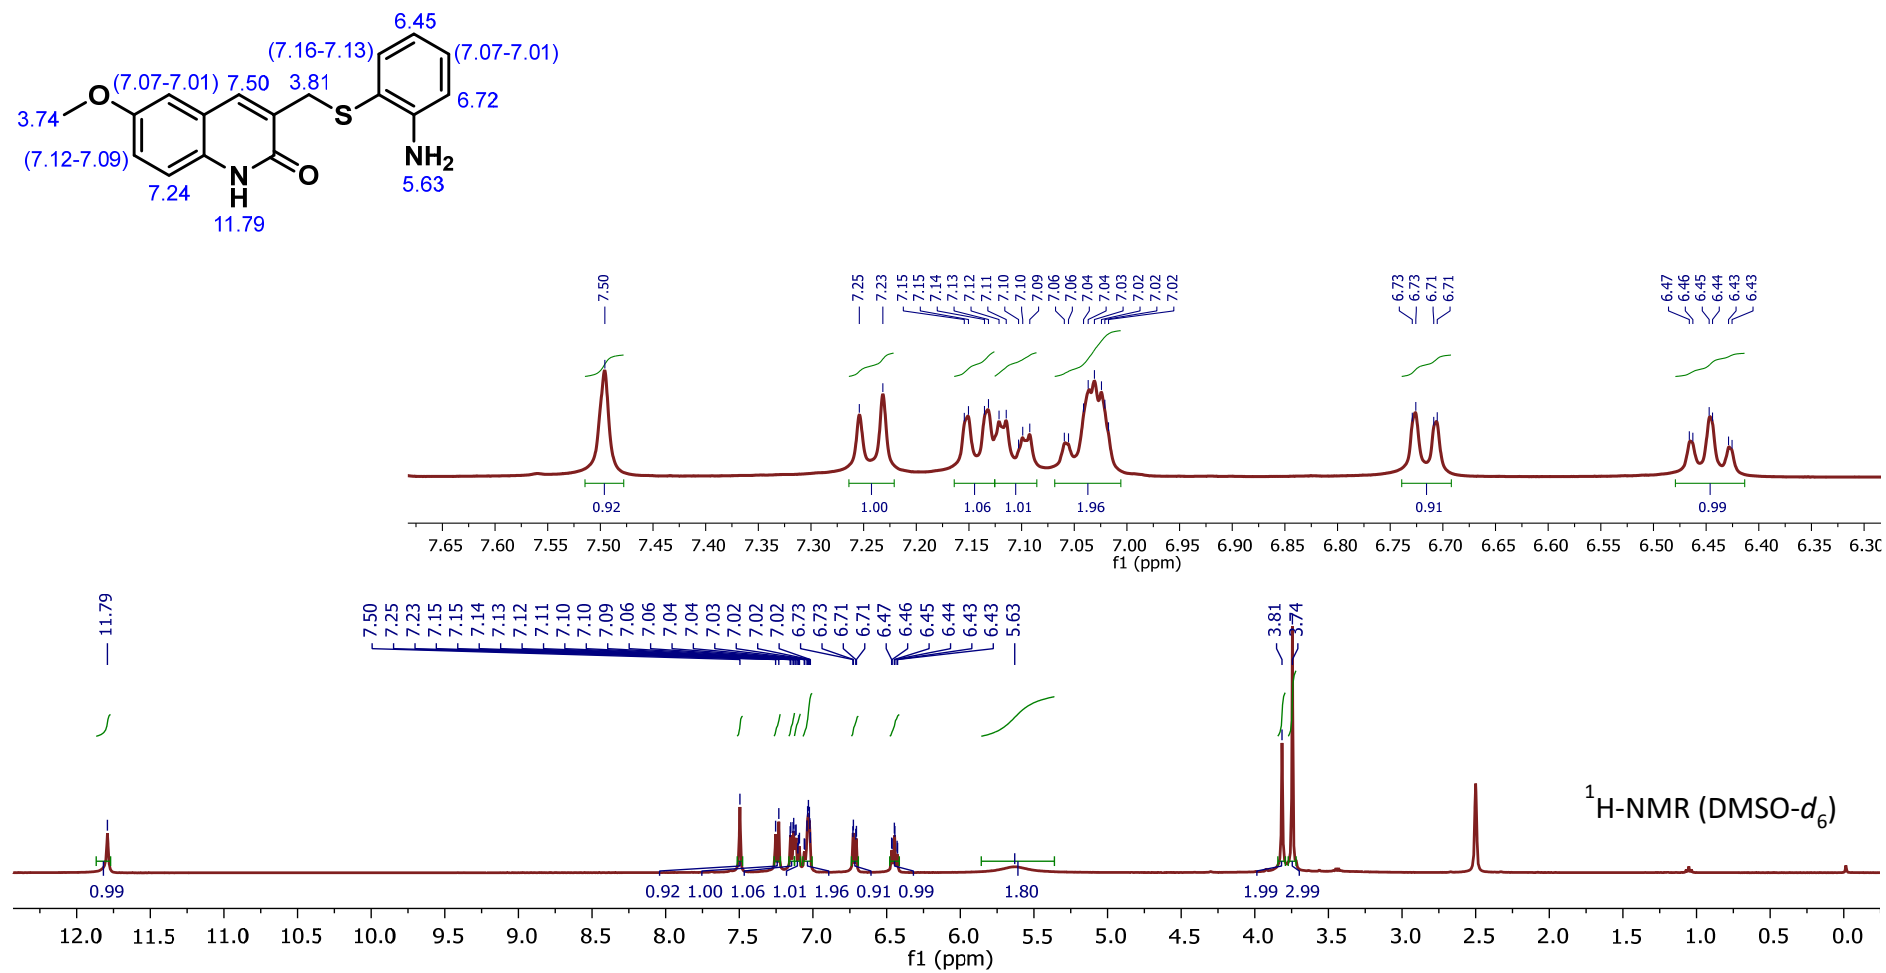

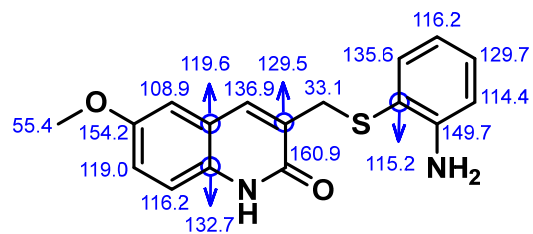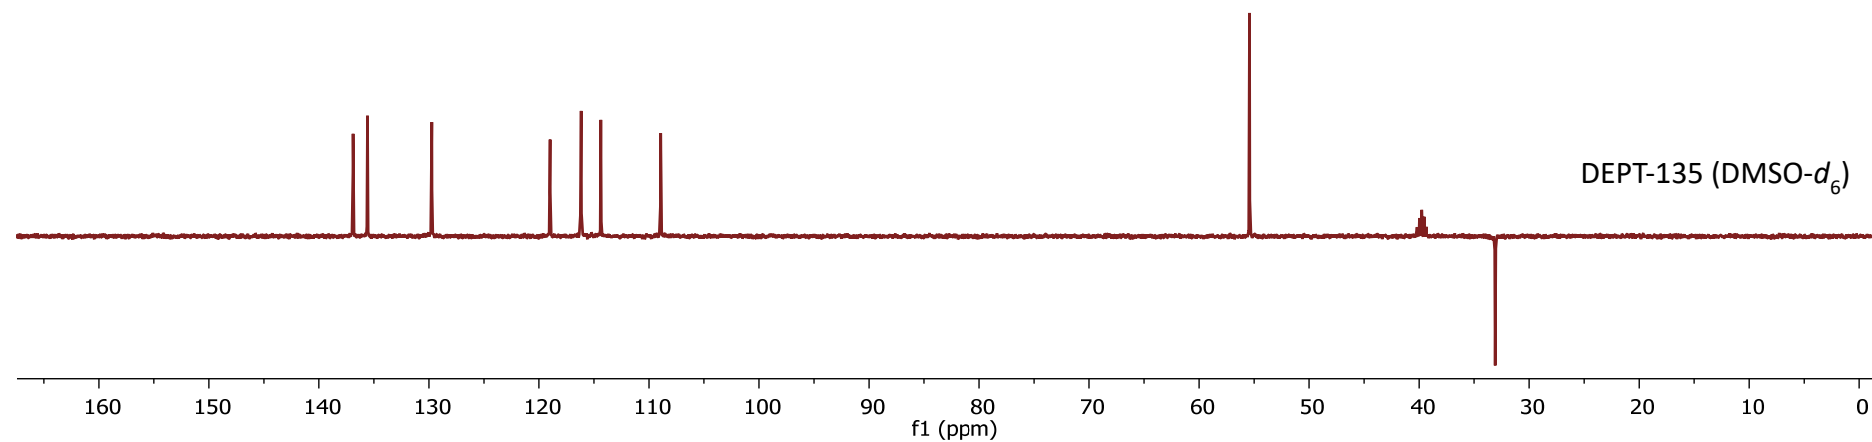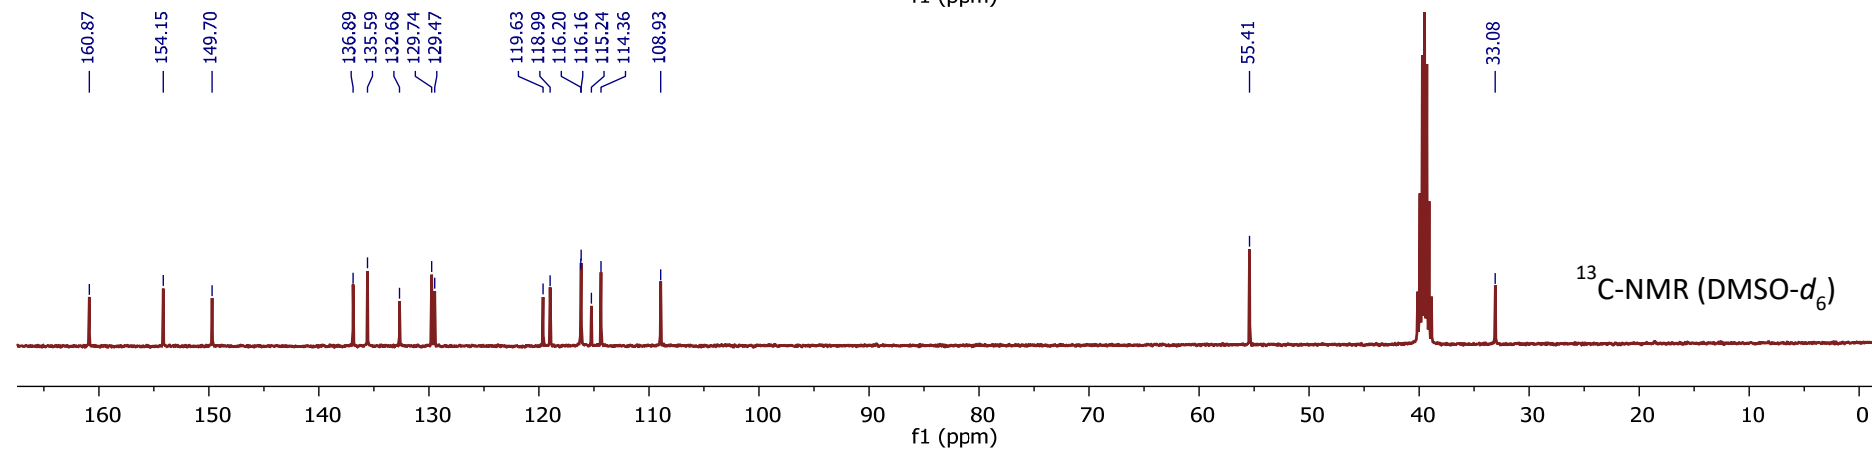

EI MS (70eV)

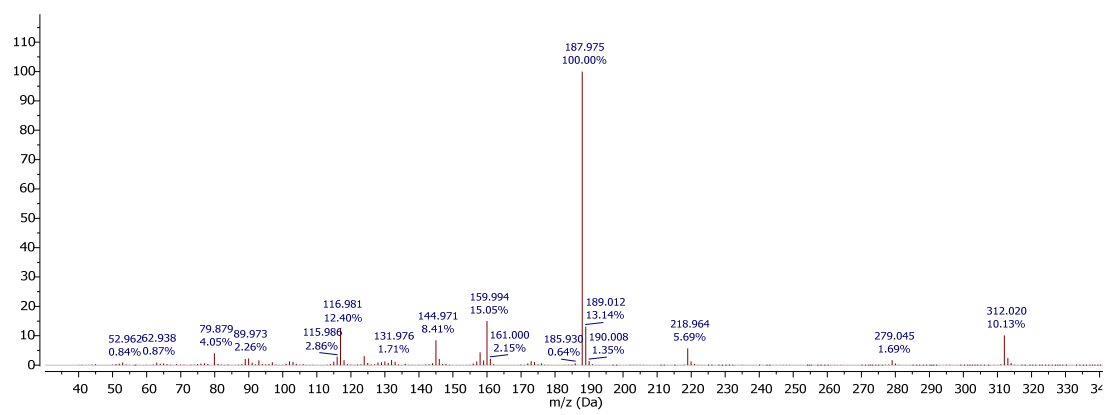

ESI-QTOF (positive ionization)

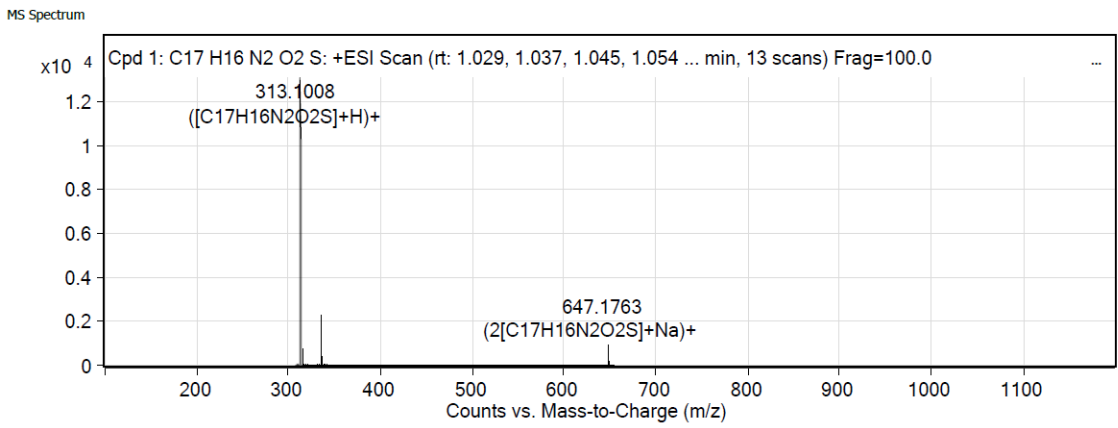

MS Spectrum Peak List

| m/z      | Calc m/z | Diff(ppm) | z | Abund    | Formula                                                         | Ion                  |
|----------|----------|-----------|---|----------|-----------------------------------------------------------------|----------------------|
| 313.1008 | 313.1005 | -1.02     | 1 | 13382.66 | C <sub>17</sub> H <sub>16</sub> N <sub>2</sub> O <sub>2</sub> S | (M+H) <sup>+</sup>   |
| 314.1039 | 314.1035 | -1.22     | 1 | 2447.19  | C <sub>17</sub> H <sub>16</sub> N <sub>2</sub> O <sub>2</sub> S | (M+H) <sup>+</sup>   |
| 315.0996 | 315.0997 | 0.44      | 1 | 729.27   | C <sub>17</sub> H <sub>16</sub> N <sub>2</sub> O <sub>2</sub> S | (M+H) <sup>+</sup>   |
| 316.0981 | 316.1012 | 9.69      | 1 | 89.5     | C <sub>17</sub> H <sub>16</sub> N <sub>2</sub> O <sub>2</sub> S | (M+H) <sup>+</sup>   |
| 335.0826 | 335.0825 | -0.45     | 1 | 2424.13  | C <sub>17</sub> H <sub>16</sub> N <sub>2</sub> O <sub>2</sub> S | (M+Na) <sup>+</sup>  |
| 336.085  | 336.0855 | 1.39      | 1 | 462.95   | C <sub>17</sub> H <sub>16</sub> N <sub>2</sub> O <sub>2</sub> S | (M+Na) <sup>+</sup>  |
| 337.0844 | 337.0817 | -8.1      | 1 | 175.52   | C <sub>17</sub> H <sub>16</sub> N <sub>2</sub> O <sub>2</sub> S | (M+Na) <sup>+</sup>  |
| 647.1763 | 647.1757 | -0.84     | 1 | 988.01   | C <sub>17</sub> H <sub>16</sub> N <sub>2</sub> O <sub>2</sub> S | (2M+Na) <sup>+</sup> |
| 648.1807 | 648.1787 | -3.08     | 1 | 355.91   | C <sub>17</sub> H <sub>16</sub> N <sub>2</sub> O <sub>2</sub> S | (2M+Na) <sup>+</sup> |
| 649.1746 | 649.1765 | 2.89      | 1 | 205.42   | C <sub>17</sub> H <sub>16</sub> N <sub>2</sub> O <sub>2</sub> S | (2M+Na) <sup>+</sup> |

# 4.8 Compound 23a

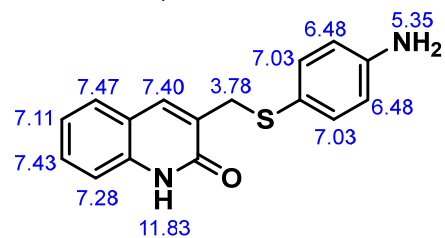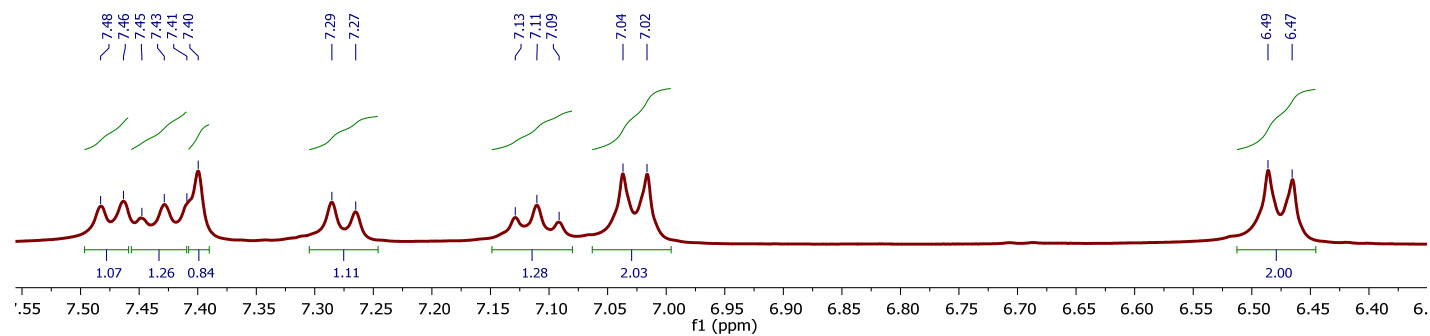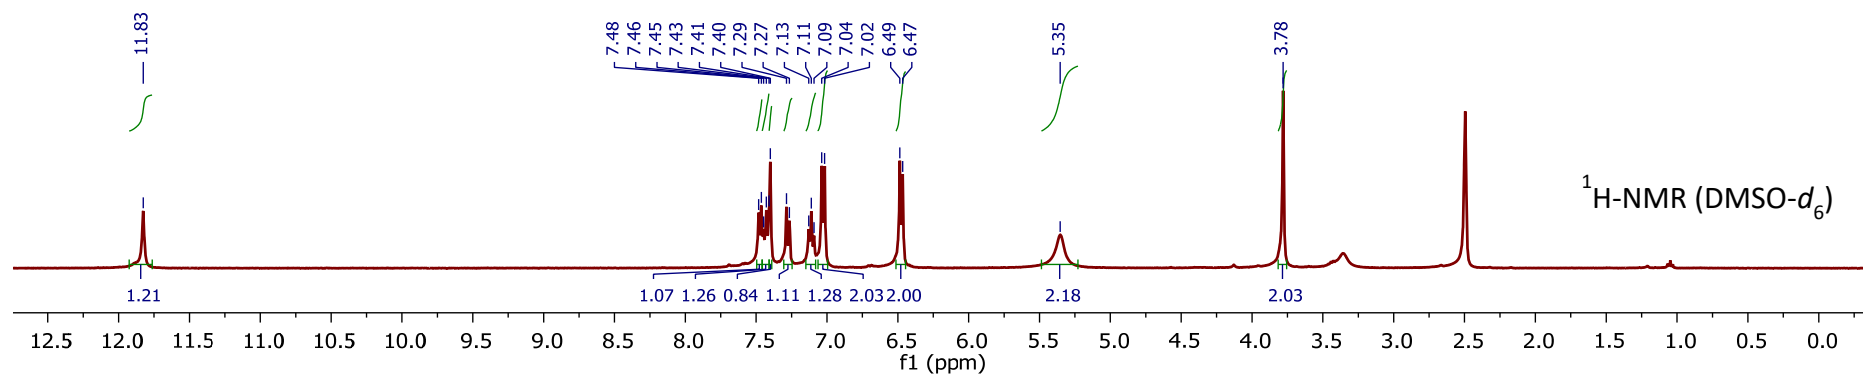

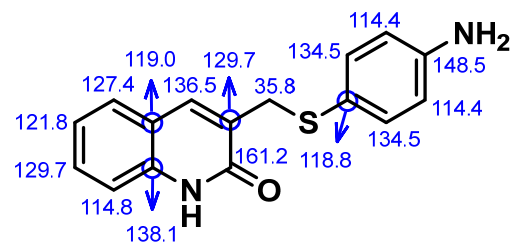

DEPT-135 ( $\text{DMSO}-d_6$ )

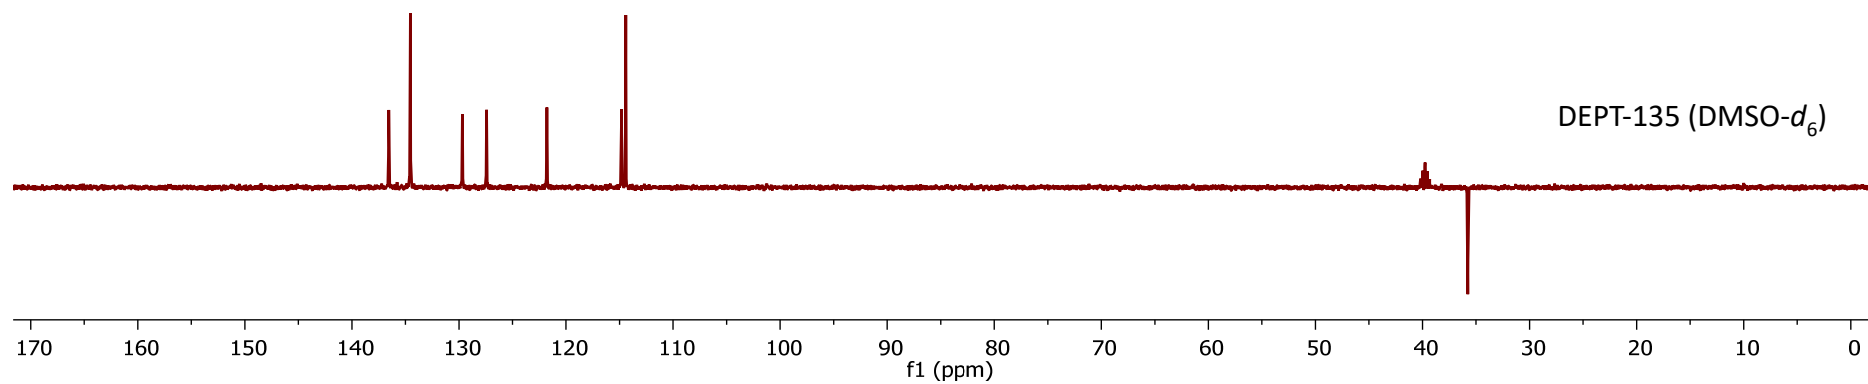

$^{13}\text{C}$ -NMR ( $\text{DMSO}-d_6$ )

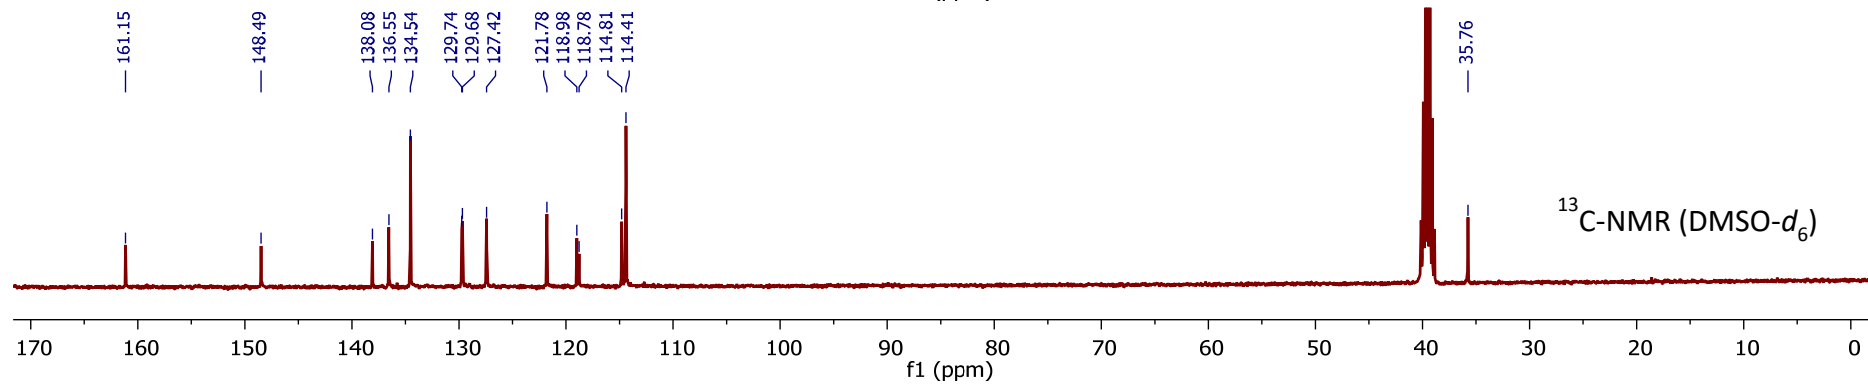



## EI MS (70eV)

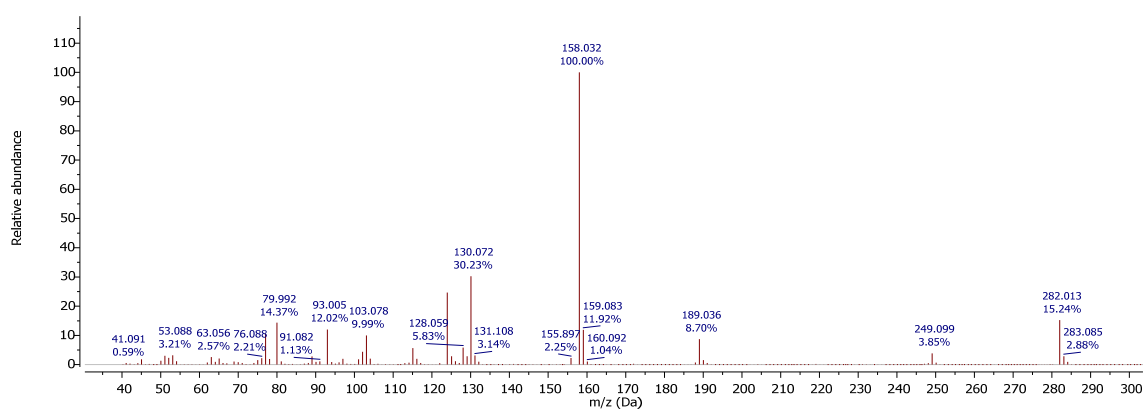

## ESI-QTOF (positive ionization)

MS Spectrum

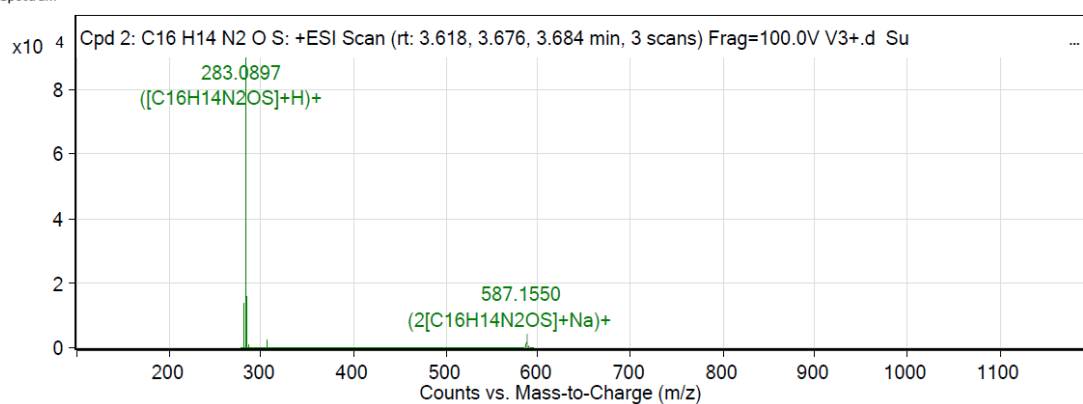

### MS Spectrum Peak List

| m/z      | Calc m/z | Diff(ppm) | z | Abund    | Formula    | Ion      |
|----------|----------|-----------|---|----------|------------|----------|
| 283.0897 | 283.09   | 0.78      | 1 | 90184.47 | C16H14N2OS | (M+H)+   |
| 284.0929 | 284.0929 | 0.17      | 1 | 15839.54 | C16H14N2OS | (M+H)+   |
| 285.0884 | 285.0887 | 1.25      | 1 | 4394.17  | C16H14N2OS | (M+H)+   |
| 305.0717 | 305.0719 | 0.82      | 1 | 2215.43  | C16H14N2OS | (M+Na)+  |
| 306.0746 | 306.0749 | 0.94      | 1 | 412.94   | C16H14N2OS | (M+Na)+  |
| 307.0649 | 307.0707 | 18.86     | 1 | 152.5    | C16H14N2OS | (M+Na)+  |
| 587.155  | 587.1546 | -0.65     | 1 | 4516.79  | C16H14N2OS | (2M+Na)+ |
| 588.1582 | 588.1576 | -1.16     | 1 | 1762.98  | C16H14N2OS | (2M+Na)+ |
| 589.1559 | 589.155  | -1.66     | 1 | 727.91   | C16H14N2OS | (2M+Na)+ |

# 4.9 Compound 23b

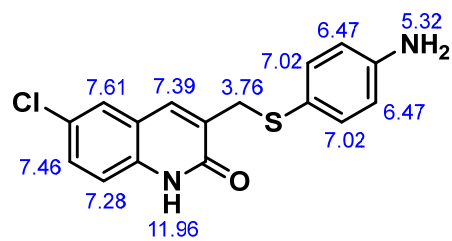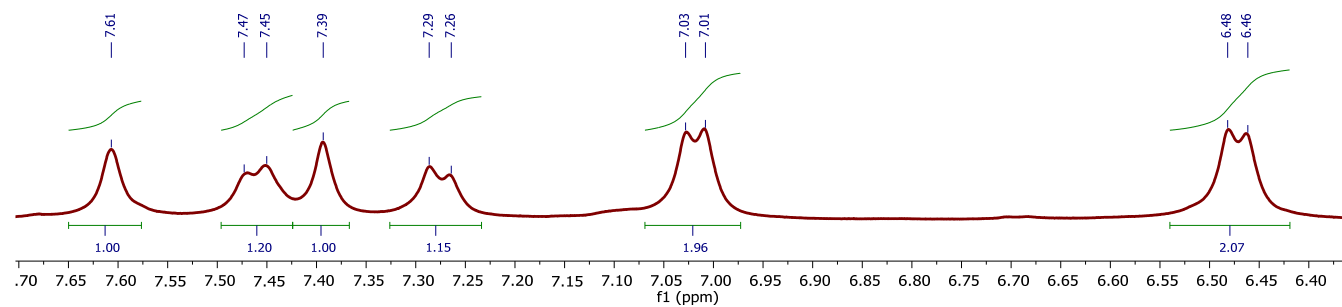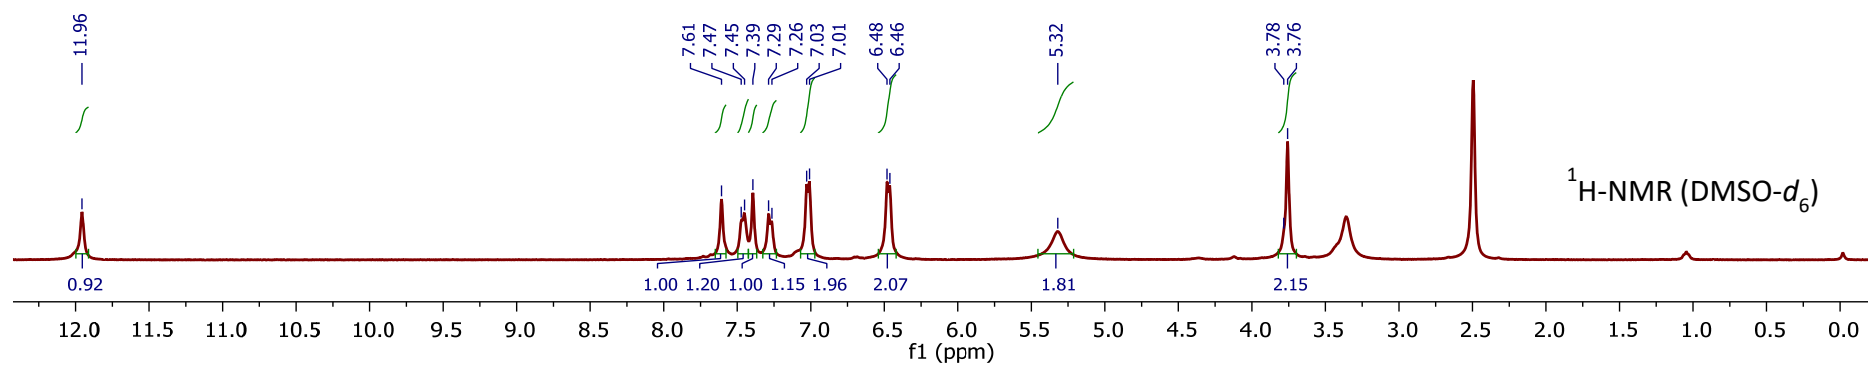

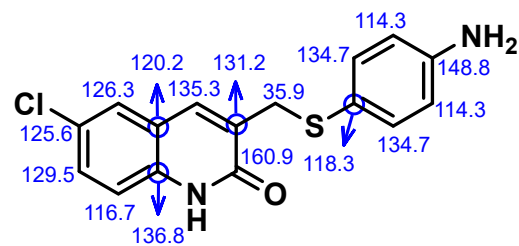

DEPT-135 (DMSO- $d_6$ )

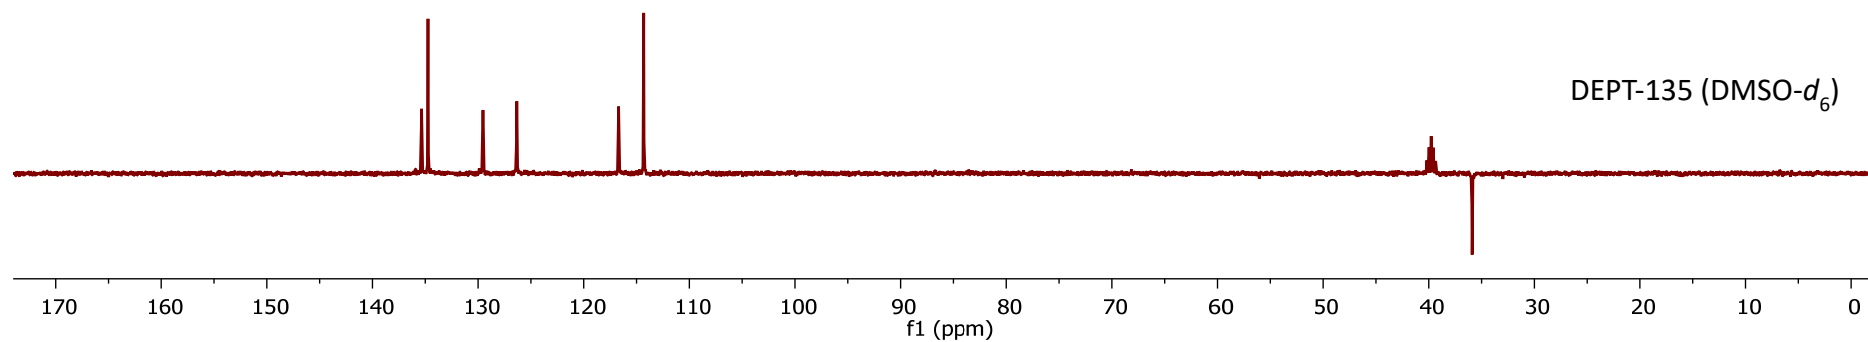

$^{13}\text{C}$ -NMR (DMSO- $d_6$ )

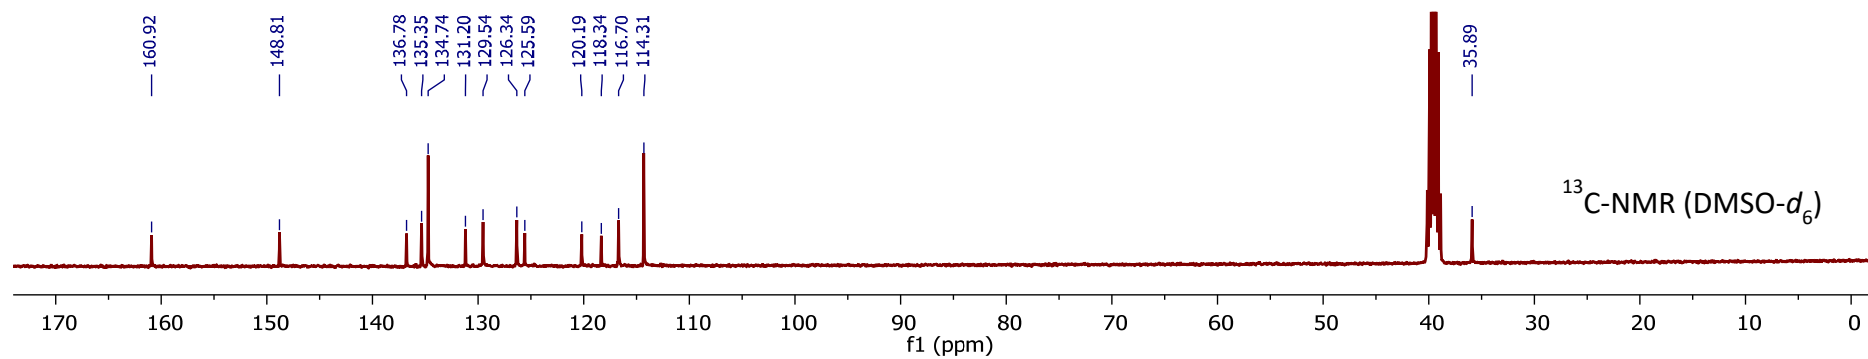

EI MS (70eV)

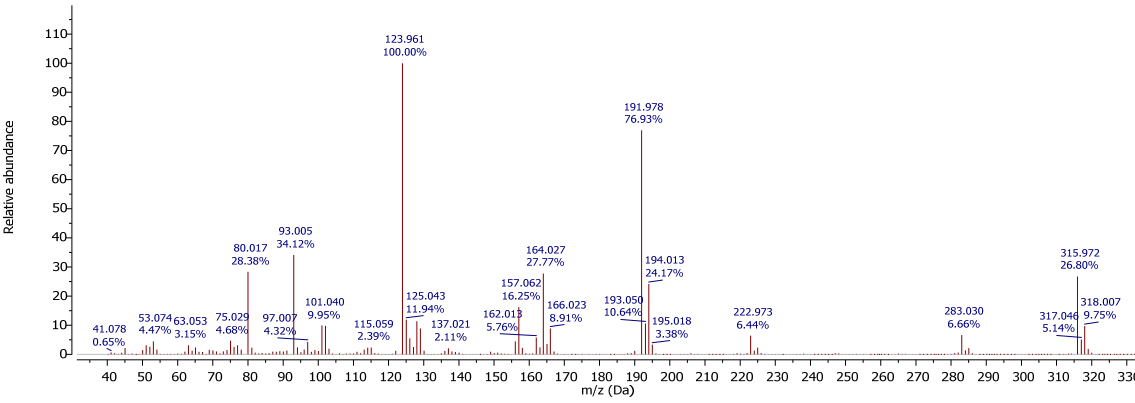

ESI-QTOF (positive ionization)

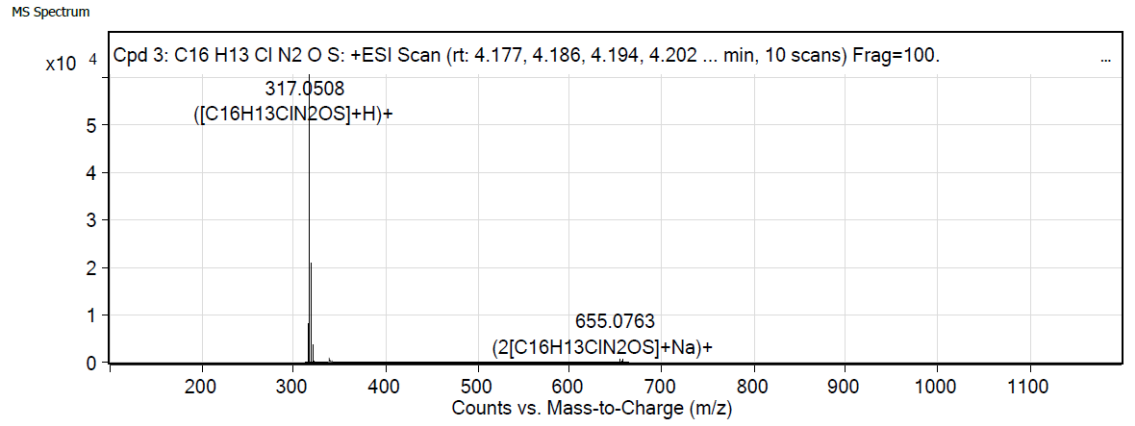

MS Spectrum Peak List

| m/z      | Calc m/z | Diff(ppm) | z | Abund    | Formula                                                           | Ion                  |
|----------|----------|-----------|---|----------|-------------------------------------------------------------------|----------------------|
| 317.0508 | 317.051  | 0.45      | 1 | 60594.69 | C <sub>16</sub> H <sub>13</sub> ClN <sub>2</sub> O <sub>2</sub> S | (M+H) <sup>+</sup>   |
| 318.0519 | 318.054  | 6.5       | 1 | 11698.33 | C <sub>16</sub> H <sub>13</sub> ClN <sub>2</sub> O <sub>2</sub> S | (M+H) <sup>+</sup>   |
| 319.048  | 319.0483 | 1.08      | 1 | 21302.87 | C <sub>16</sub> H <sub>13</sub> ClN <sub>2</sub> O <sub>2</sub> S | (M+H) <sup>+</sup>   |
| 320.0507 | 320.051  | 1.13      | 1 | 3894.05  | C <sub>16</sub> H <sub>13</sub> ClN <sub>2</sub> O <sub>2</sub> S | (M+H) <sup>+</sup>   |
| 321.0456 | 321.0471 | 4.49      | 1 | 1189.33  | C <sub>16</sub> H <sub>13</sub> ClN <sub>2</sub> O <sub>2</sub> S | (M+H) <sup>+</sup>   |
| 339.0321 | 339.0329 | 2.45      | 1 | 937.9    | C <sub>16</sub> H <sub>13</sub> ClN <sub>2</sub> O <sub>2</sub> S | (M+Na) <sup>+</sup>  |
| 341.0301 | 341.0303 | 0.58      | 1 | 342.45   | C <sub>16</sub> H <sub>13</sub> ClN <sub>2</sub> O <sub>2</sub> S | (M+Na) <sup>+</sup>  |
| 655.0763 | 655.0766 | 0.55      | 1 | 663.34   | C <sub>16</sub> H <sub>13</sub> ClN <sub>2</sub> O <sub>2</sub> S | (2M+Na) <sup>+</sup> |
| 657.0749 | 657.0744 | -0.84     | 1 | 508.51   | C <sub>16</sub> H <sub>13</sub> ClN <sub>2</sub> O <sub>2</sub> S | (2M+Na) <sup>+</sup> |
| 658.0775 | 658.0768 | -1.07     | 1 | 251.62   | C <sub>16</sub> H <sub>13</sub> ClN <sub>2</sub> O <sub>2</sub> S | (2M+Na) <sup>+</sup> |

4.10 Compound 23c

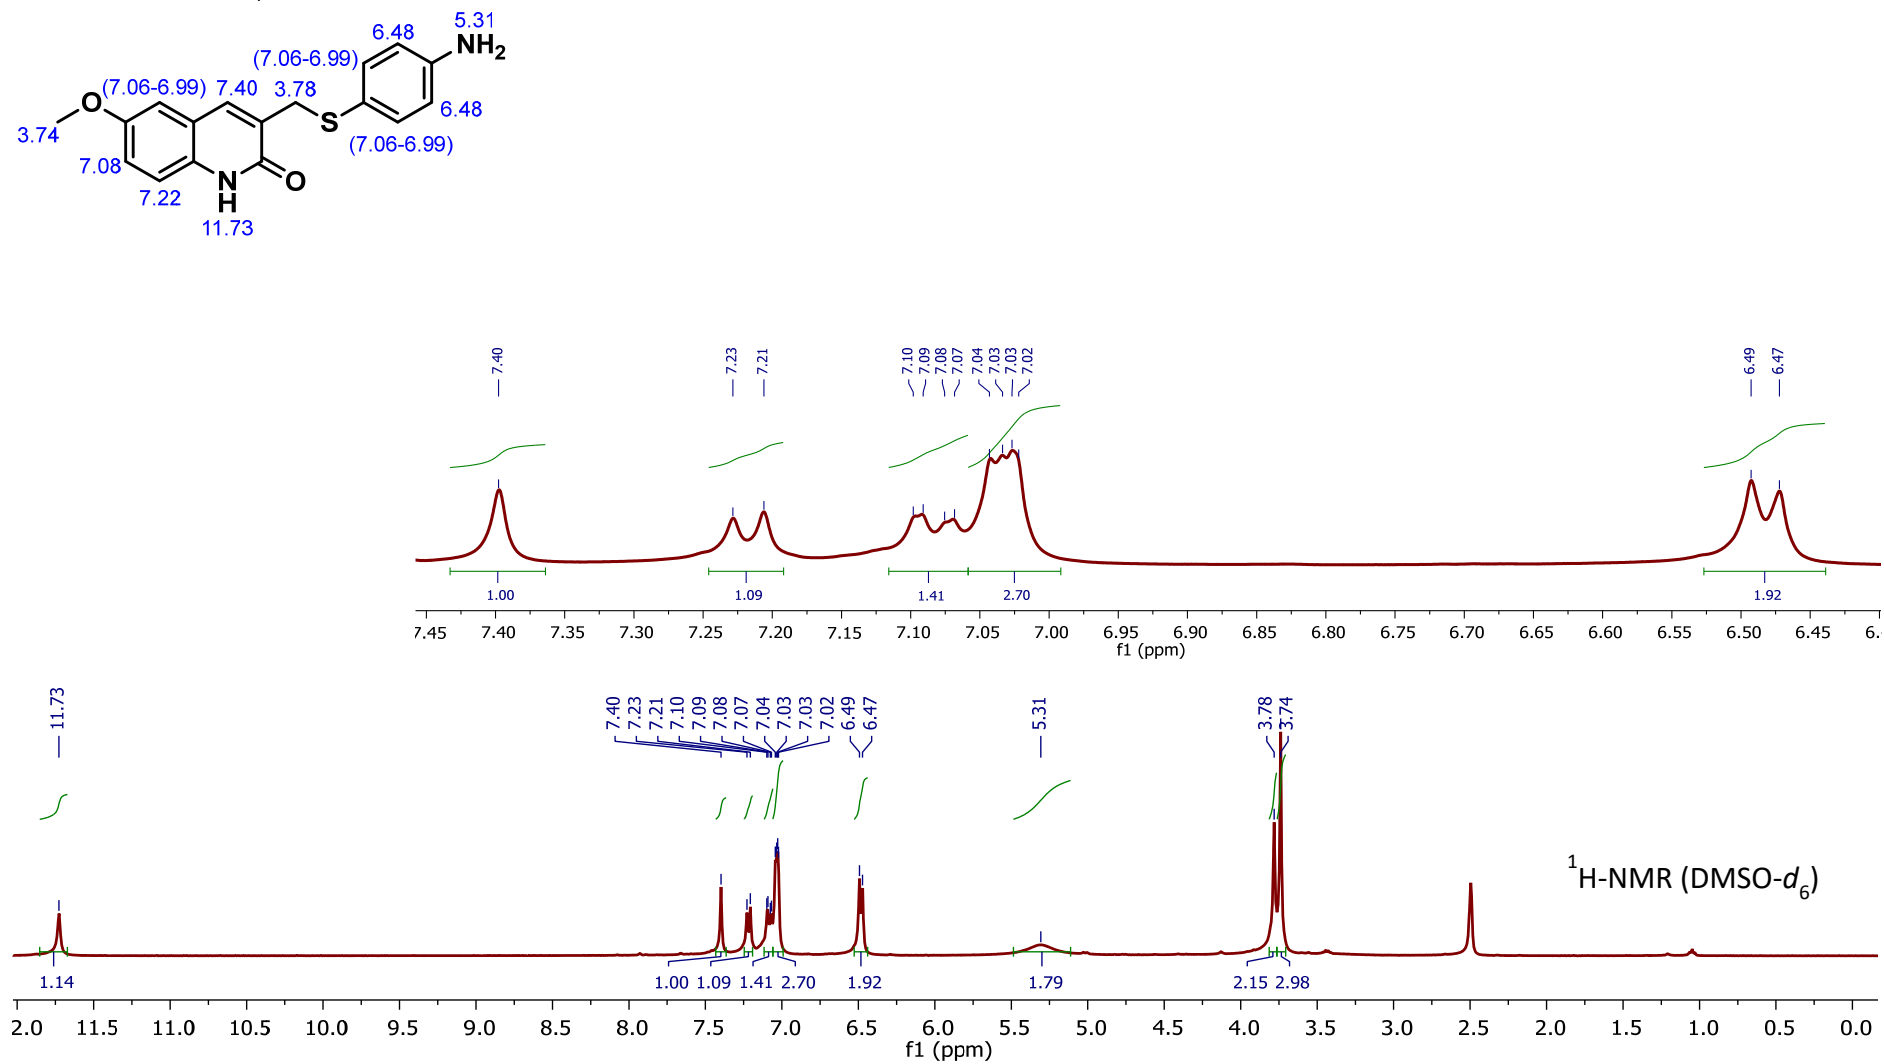

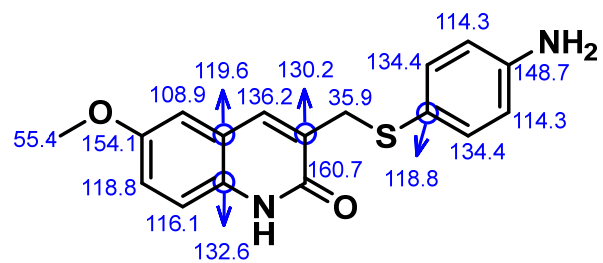

DEPT-135 (DMSO-*d*<sub>6</sub>)

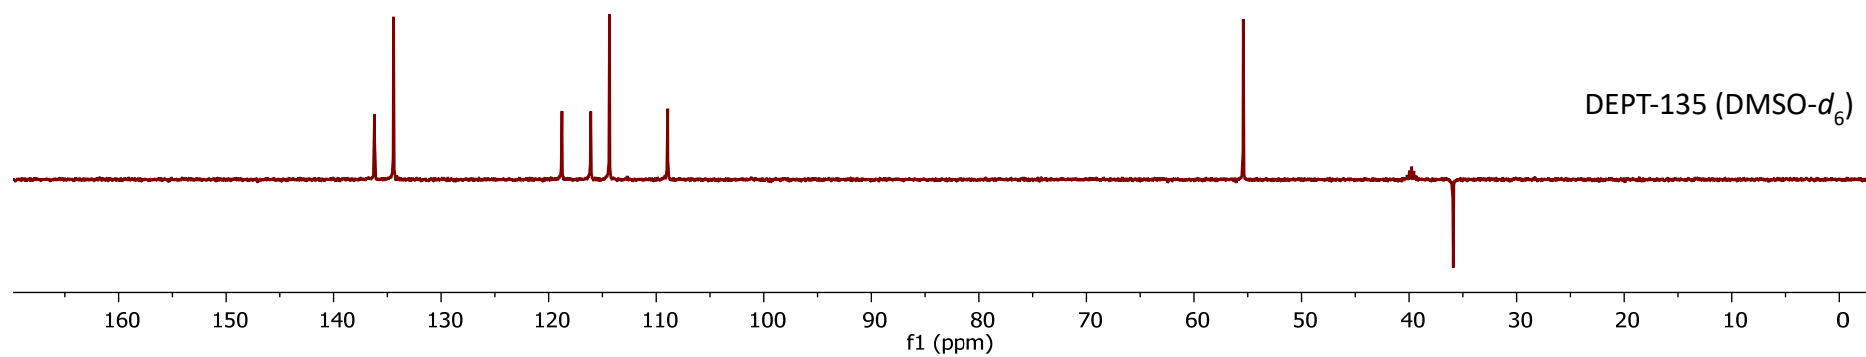

<sup>13</sup>C-NMR (DMSO-*d*<sub>6</sub>)

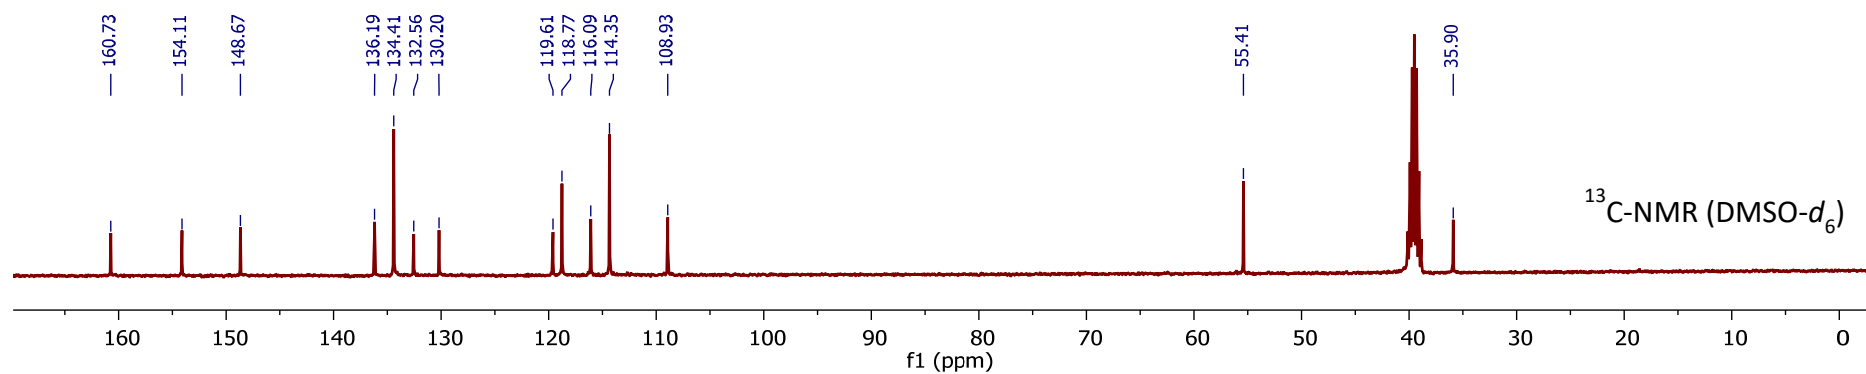

## EI MS (70eV)

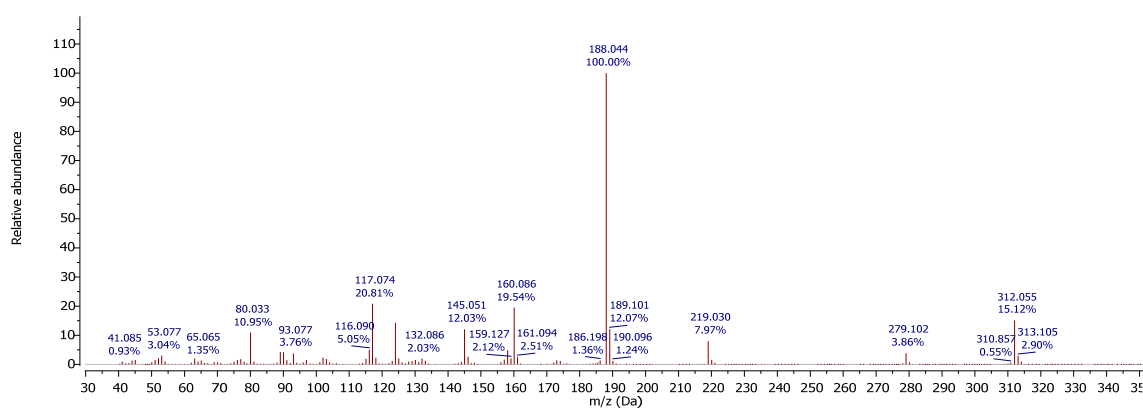

## ESI-QTOF (positive ionization)

MS Zoomed Spectrum

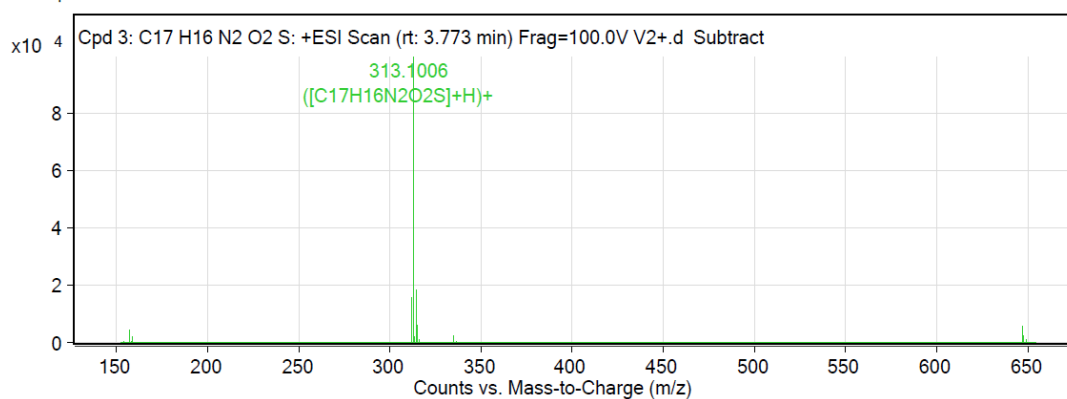

### MS Spectrum Peak List

| m/z      | Calc m/z | Diff(ppm) | z | Abund     | Formula                                                         | Ion      |
|----------|----------|-----------|---|-----------|-----------------------------------------------------------------|----------|
| 157.0524 | 157.0539 | 9.51      | 2 | 4559.77   | C <sub>17</sub> H <sub>16</sub> N <sub>2</sub> O <sub>2</sub> S | (M+2H)+2 |
| 157.5549 | 157.5554 | 3.06      | 2 | 765.06    | C <sub>17</sub> H <sub>16</sub> N <sub>2</sub> O <sub>2</sub> S | (M+2H)+2 |
| 313.1006 | 313.1005 | -0.33     | 1 | 102166.45 | C <sub>17</sub> H <sub>16</sub> N <sub>2</sub> O <sub>2</sub> S | (M+H)+   |
| 314.1042 | 314.1035 | -2        | 1 | 18677.32  | C <sub>17</sub> H <sub>16</sub> N <sub>2</sub> O <sub>2</sub> S | (M+H)+   |
| 315.0997 | 315.0997 | -0.02     | 1 | 6155.71   | C <sub>17</sub> H <sub>16</sub> N <sub>2</sub> O <sub>2</sub> S | (M+H)+   |
| 335.0829 | 335.0825 | -1.31     | 1 | 2635.22   | C <sub>17</sub> H <sub>16</sub> N <sub>2</sub> O <sub>2</sub> S | (M+Na)+  |
| 336.0885 | 336.0855 | -9.12     | 1 | 518.64    | C <sub>17</sub> H <sub>16</sub> N <sub>2</sub> O <sub>2</sub> S | (M+Na)+  |
| 647.177  | 647.1757 | -2.05     | 1 | 5555      | C <sub>17</sub> H <sub>16</sub> N <sub>2</sub> O <sub>2</sub> S | (2M+Na)+ |
| 648.1801 | 648.1787 | -2.06     | 1 | 2482.27   | C <sub>17</sub> H <sub>16</sub> N <sub>2</sub> O <sub>2</sub> S | (2M+Na)+ |
| 649.1823 | 649.1765 | -8.92     | 1 | 842.61    | C <sub>17</sub> H <sub>16</sub> N <sub>2</sub> O <sub>2</sub> S | (2M+Na)+ |

4.11 Compound 24a

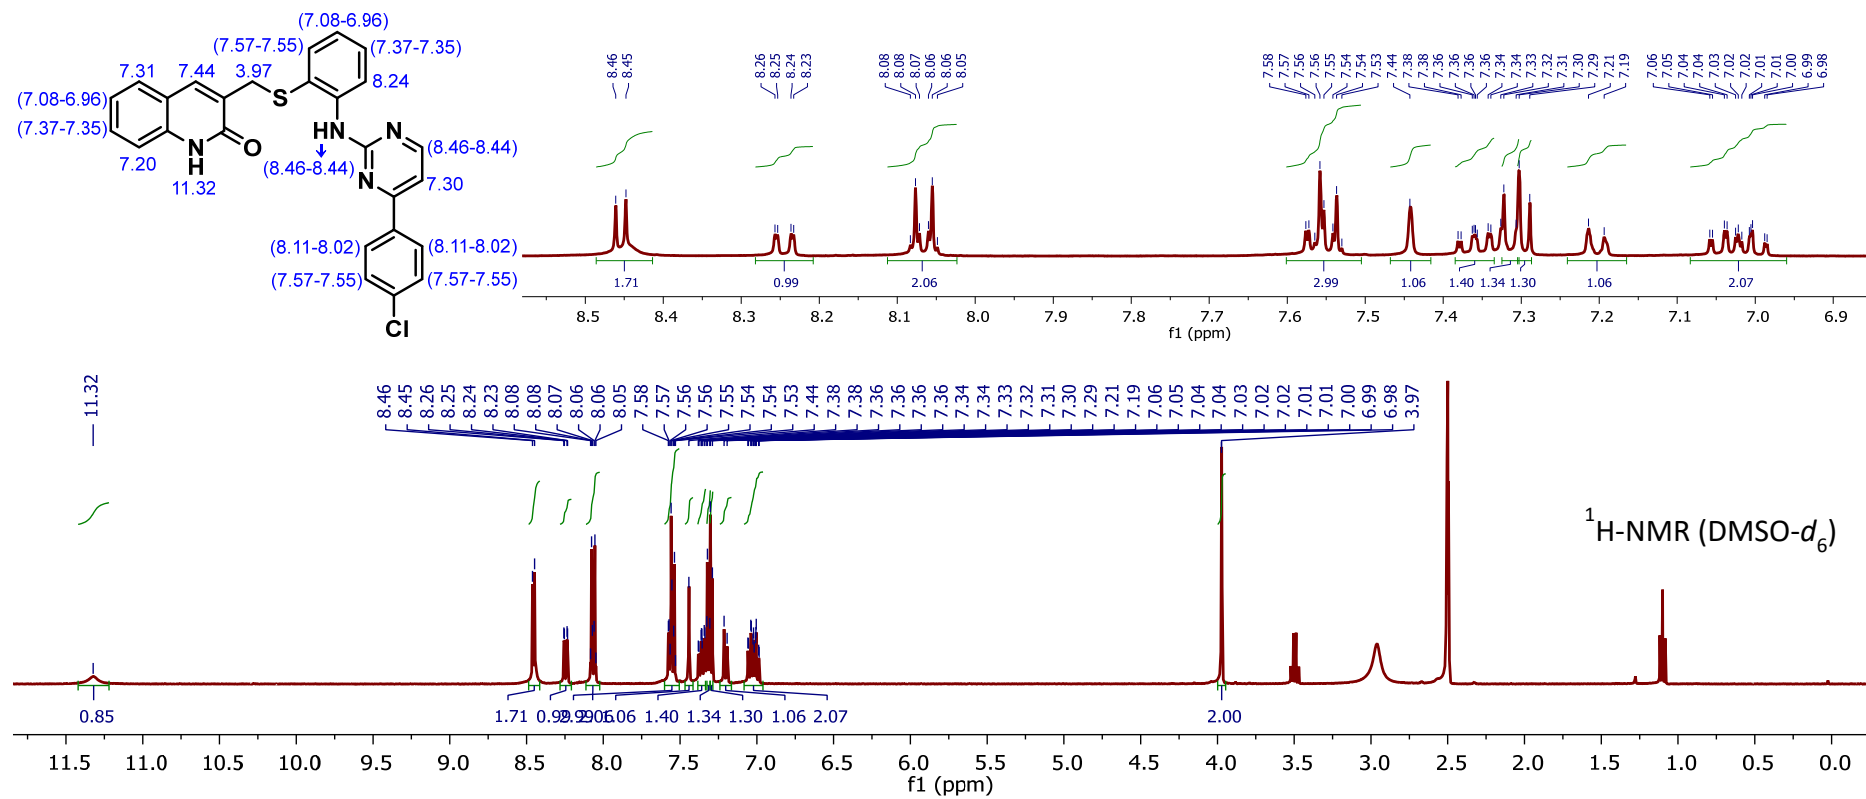



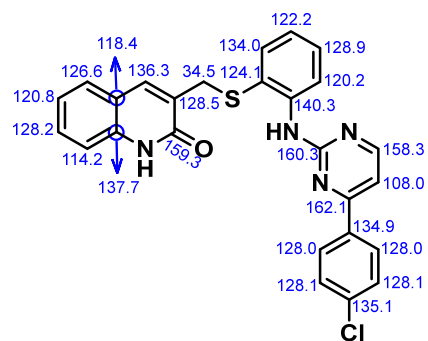

DEPT-135 ( $\text{DMSO}-d_6$ )

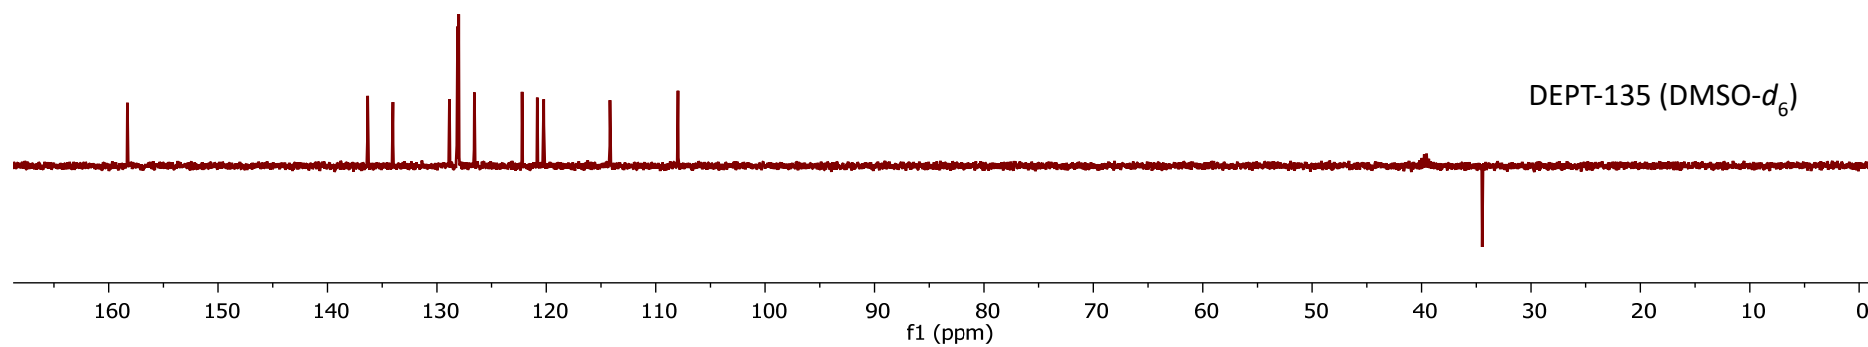

$^{13}\text{C}$ -NMR ( $\text{DMSO}-d_6$ )

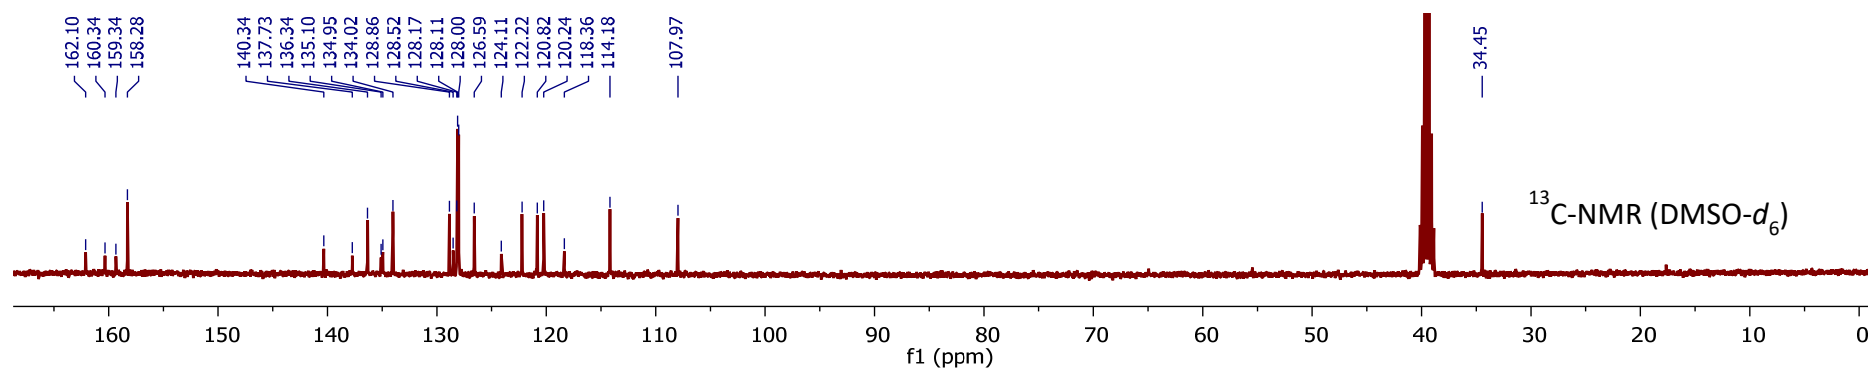

EI MS (70eV)

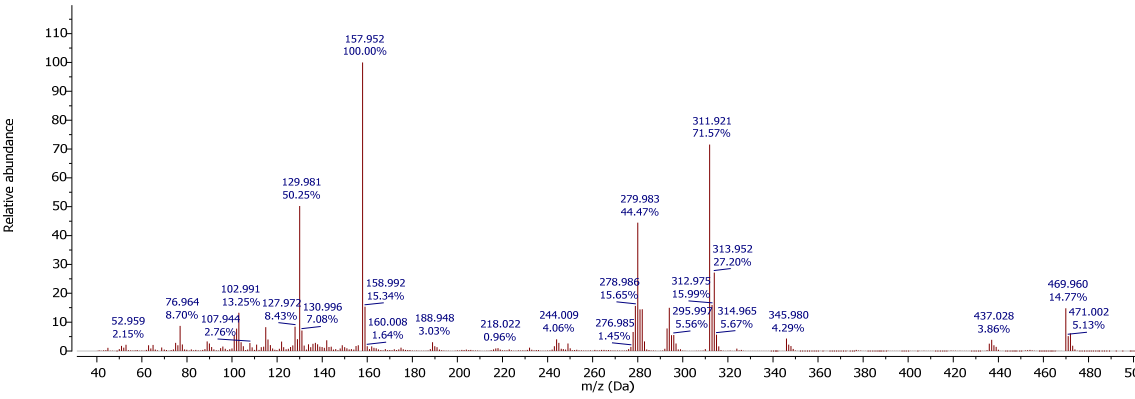

ESI-QTOF (positive ionization)

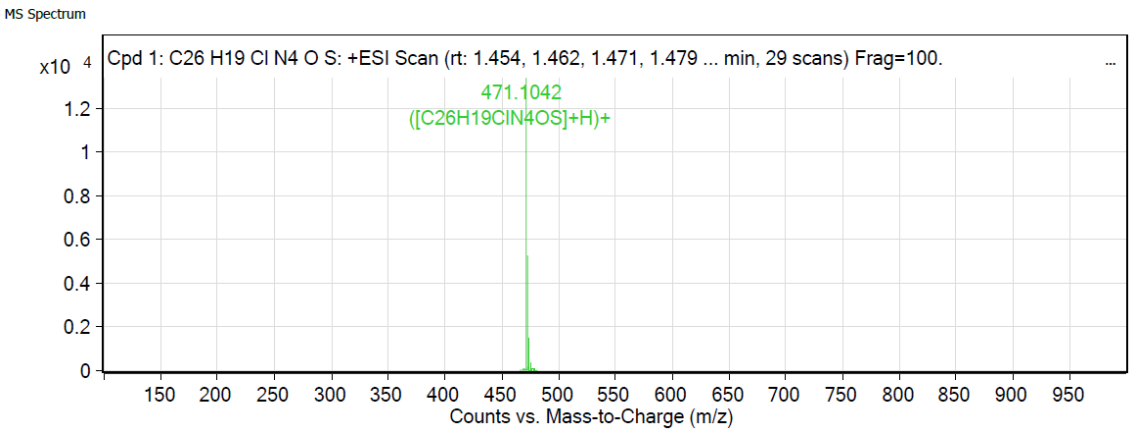

MS Spectrum Peak List

| m/z      | Calc m/z | Diff(ppm) | z | Abund    | Formula                                                         | Ion                |
|----------|----------|-----------|---|----------|-----------------------------------------------------------------|--------------------|
| 471.1042 | 471.1041 | -0.14     | 1 | 13681.64 | C <sub>26</sub> H <sub>19</sub> ClN <sub>4</sub> O <sub>5</sub> | (M+H) <sup>+</sup> |
| 472.1075 | 472.1071 | -0.84     | 1 | 3982.72  | C <sub>26</sub> H <sub>19</sub> ClN <sub>4</sub> O <sub>5</sub> | (M+H) <sup>+</sup> |
| 473.1018 | 473.102  | 0.35      | 1 | 5511.6   | C <sub>26</sub> H <sub>19</sub> ClN <sub>4</sub> O <sub>5</sub> | (M+H) <sup>+</sup> |
| 474.1039 | 474.1043 | 0.85      | 1 | 1595.88  | C <sub>26</sub> H <sub>19</sub> ClN <sub>4</sub> O <sub>5</sub> | (M+H) <sup>+</sup> |
| 475.1025 | 475.1025 | -0.09     | 1 | 360.43   | C <sub>26</sub> H <sub>19</sub> ClN <sub>4</sub> O <sub>5</sub> | (M+H) <sup>+</sup> |
| 476.1051 | 476.1029 | -4.52     | 1 | 47.53    | C <sub>26</sub> H <sub>19</sub> ClN <sub>4</sub> O <sub>5</sub> | (M+H) <sup>+</sup> |

4.12 Compound 24b

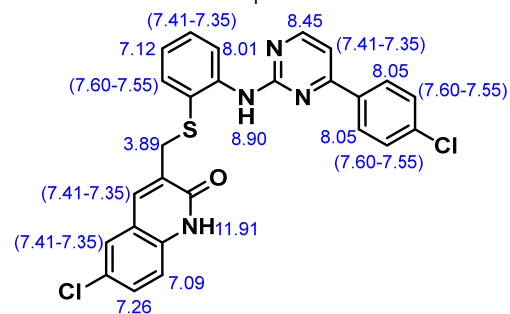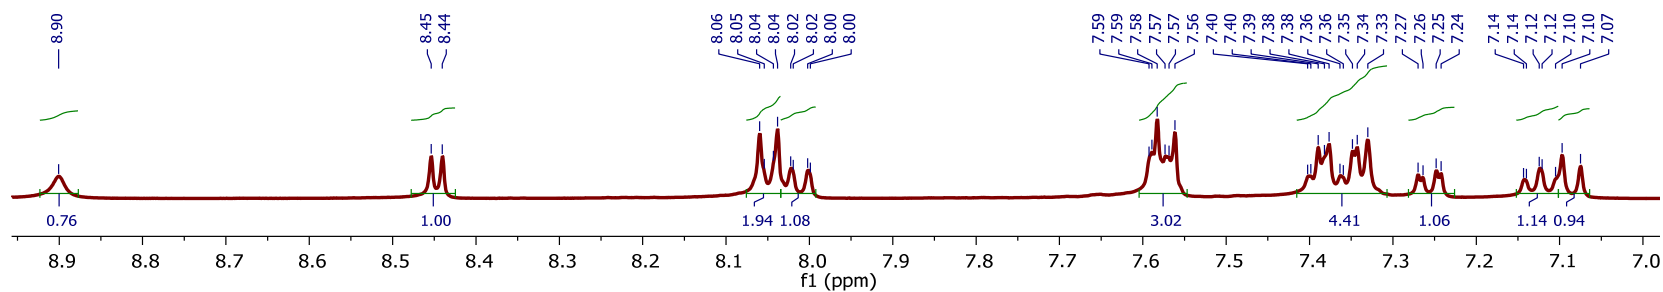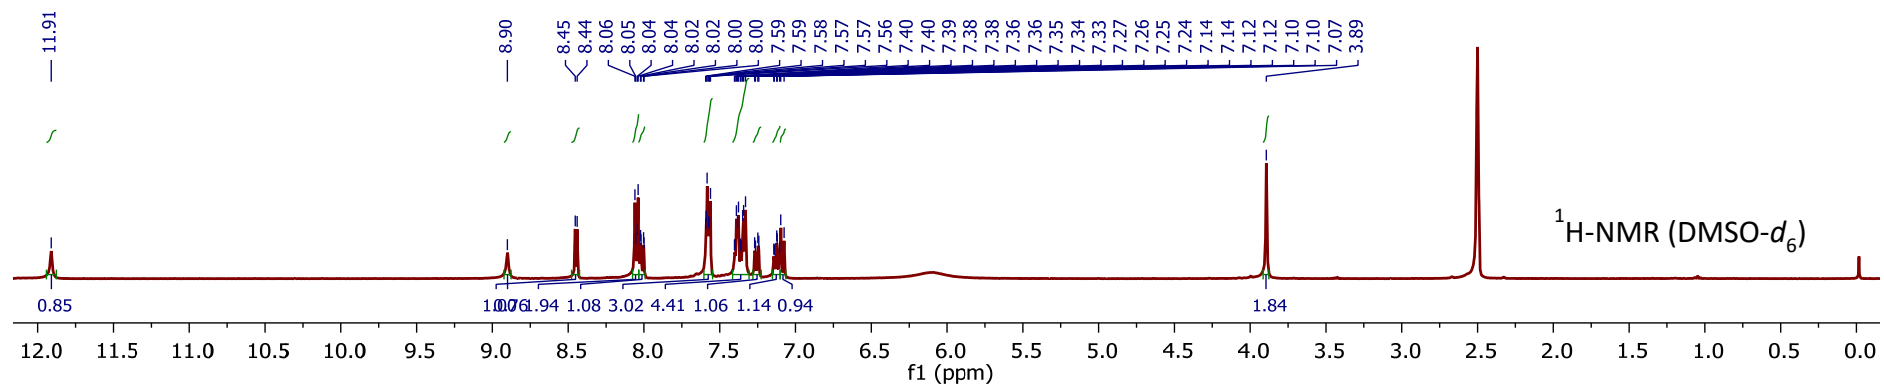

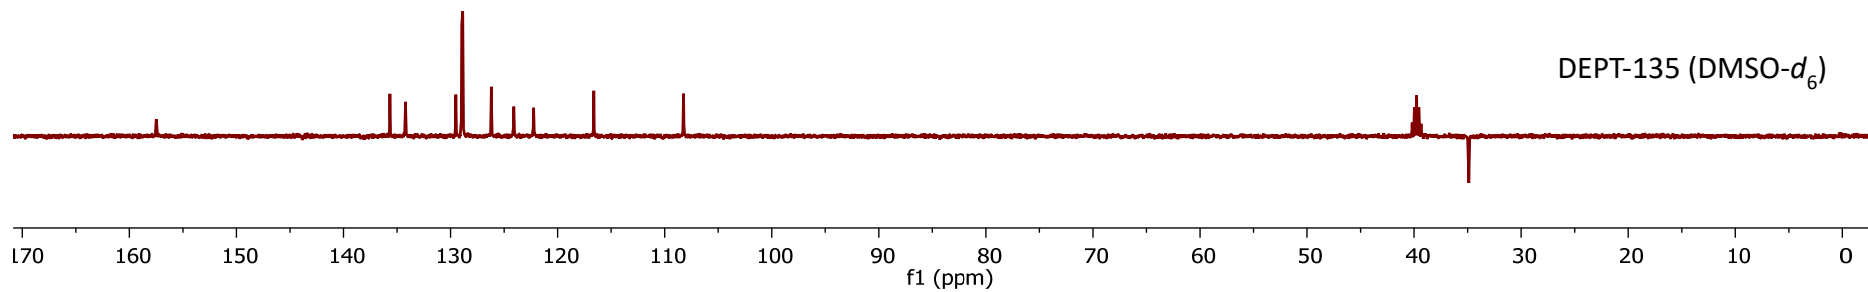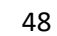

EI MS (70eV)

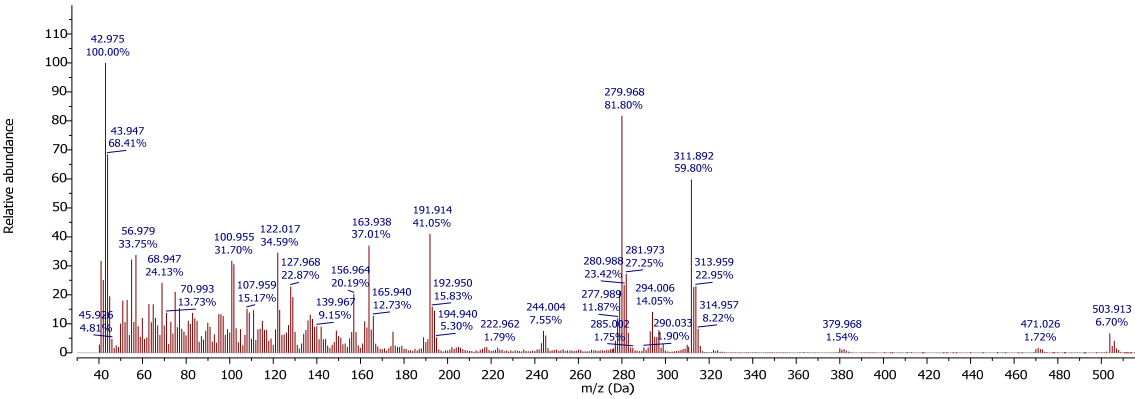

ESI-QTOF (positive ionization)

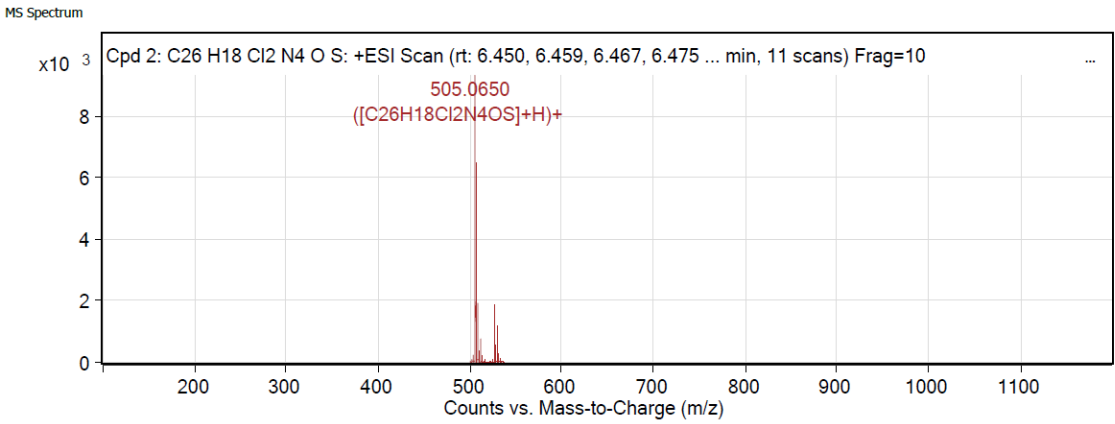

MS Spectrum Peak List

| m/z      | Calc m/z | Diff(ppm) | z | Abund   | Formula                                                           | Ion     |
|----------|----------|-----------|---|---------|-------------------------------------------------------------------|---------|
| 505.065  | 505.0651 | 0.24      | 1 | 9495.01 | C <sub>26</sub> H <sub>18</sub> Cl <sub>2</sub> N <sub>4</sub> OS | (M+H)+  |
| 506.0685 | 506.0681 | -0.87     | 1 | 3037.56 | C <sub>26</sub> H <sub>18</sub> Cl <sub>2</sub> N <sub>4</sub> OS | (M+H)+  |
| 507.0624 | 507.0627 | 0.55      | 1 | 6658.38 | C <sub>26</sub> H <sub>18</sub> Cl <sub>2</sub> N <sub>4</sub> OS | (M+H)+  |
| 508.0651 | 508.0653 | 0.41      | 1 | 1980.76 | C <sub>26</sub> H <sub>18</sub> Cl <sub>2</sub> N <sub>4</sub> OS | (M+H)+  |
| 509.0605 | 509.0608 | 0.52      | 1 | 1507.94 | C <sub>26</sub> H <sub>18</sub> Cl <sub>2</sub> N <sub>4</sub> OS | (M+H)+  |
| 510.0626 | 510.0626 | 0.07      | 1 | 423.29  | C <sub>26</sub> H <sub>18</sub> Cl <sub>2</sub> N <sub>4</sub> OS | (M+H)+  |
| 527.0473 | 527.0471 | -0.55     | 1 | 1897.1  | C <sub>26</sub> H <sub>18</sub> Cl <sub>2</sub> N <sub>4</sub> OS | (M+Na)+ |
| 528.0515 | 528.05   | -2.84     | 1 | 538.21  | C <sub>26</sub> H <sub>18</sub> Cl <sub>2</sub> N <sub>4</sub> OS | (M+Na)+ |
| 529.0448 | 529.0446 | -0.36     | 1 | 1290.64 | C <sub>26</sub> H <sub>18</sub> Cl <sub>2</sub> N <sub>4</sub> OS | (M+Na)+ |
| 530.0491 | 530.0472 | -3.54     | 1 | 371.94  | C <sub>26</sub> H <sub>18</sub> Cl <sub>2</sub> N <sub>4</sub> OS | (M+Na)+ |

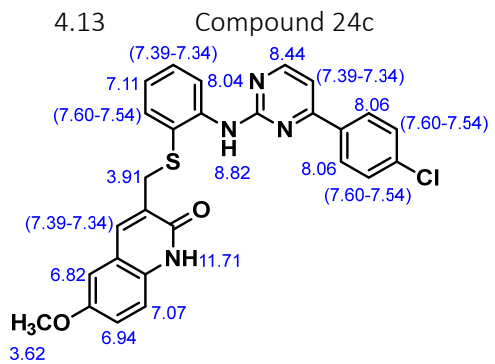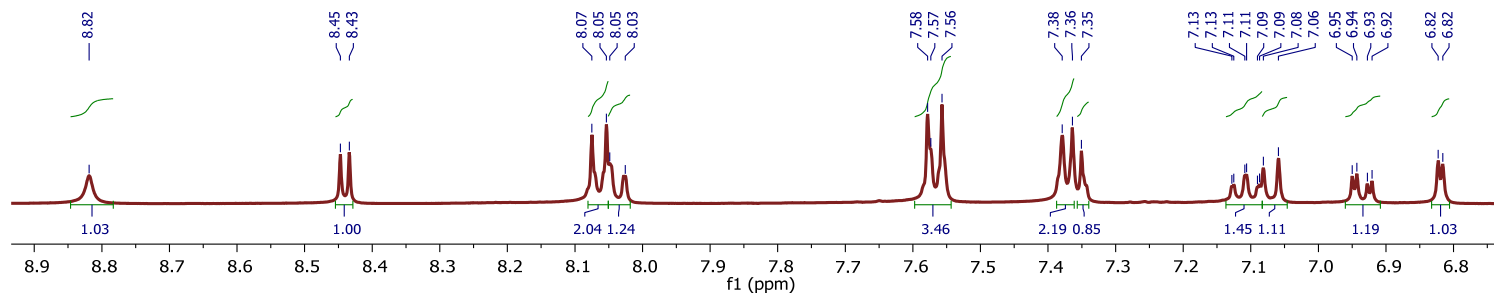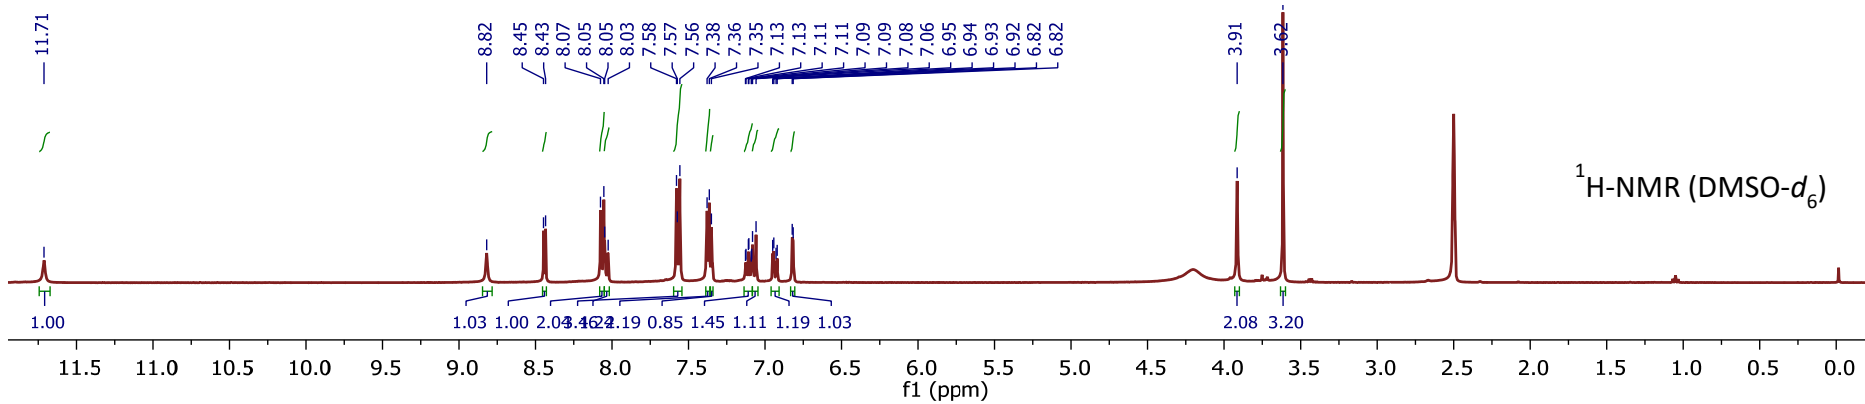

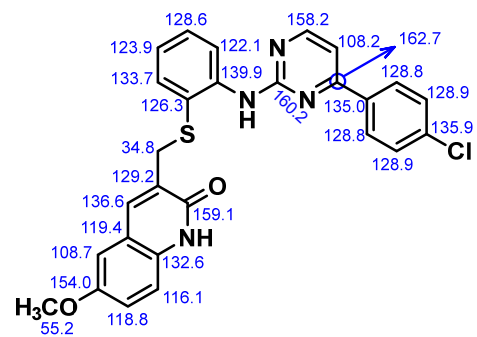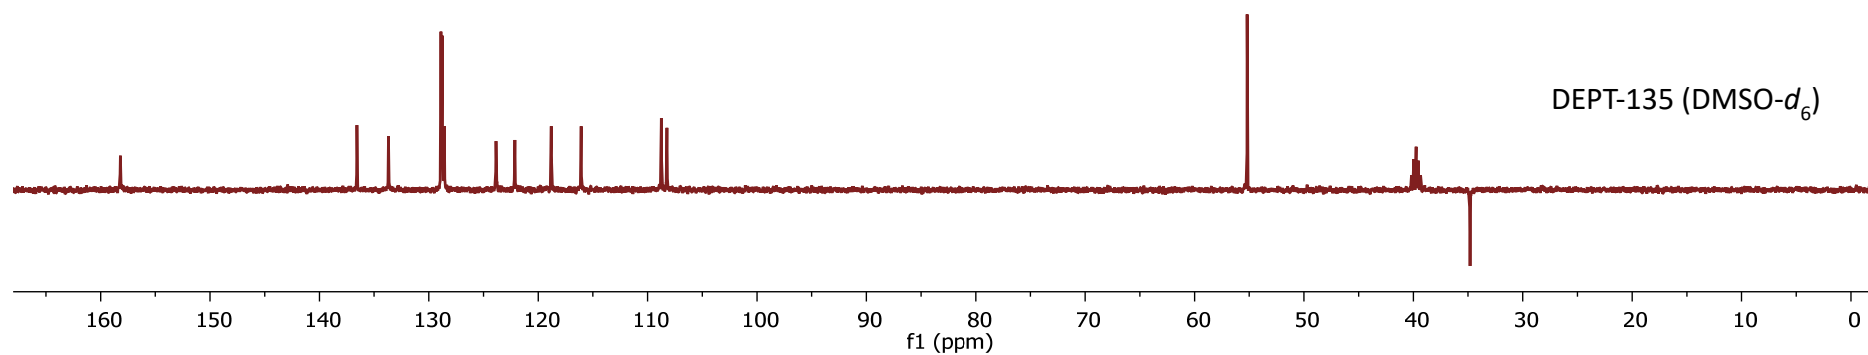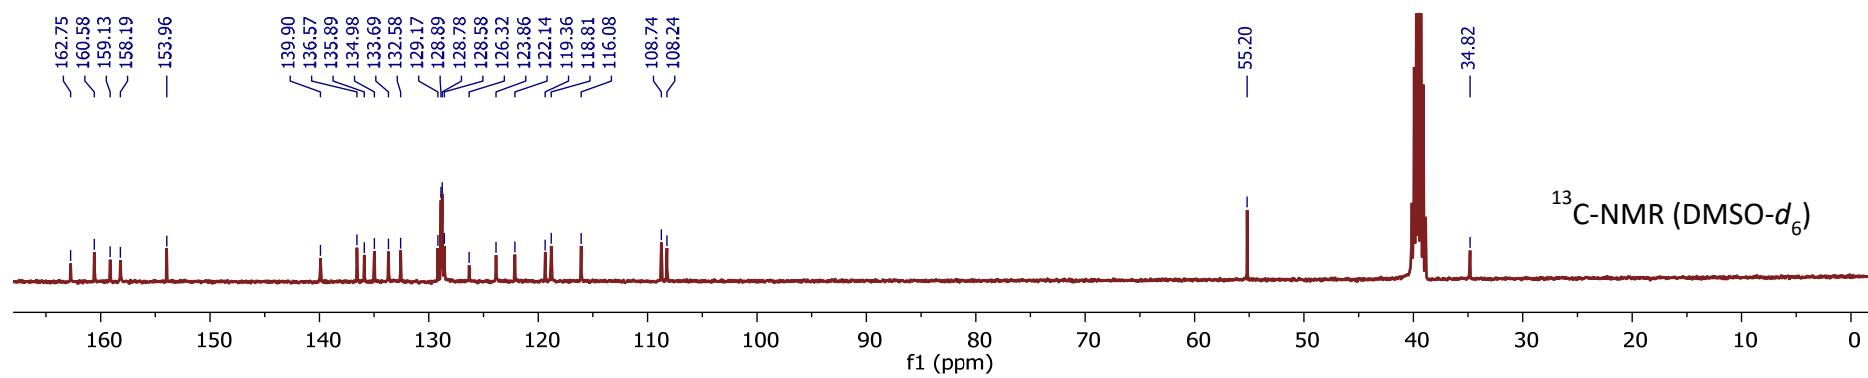

## EI MS (70eV)

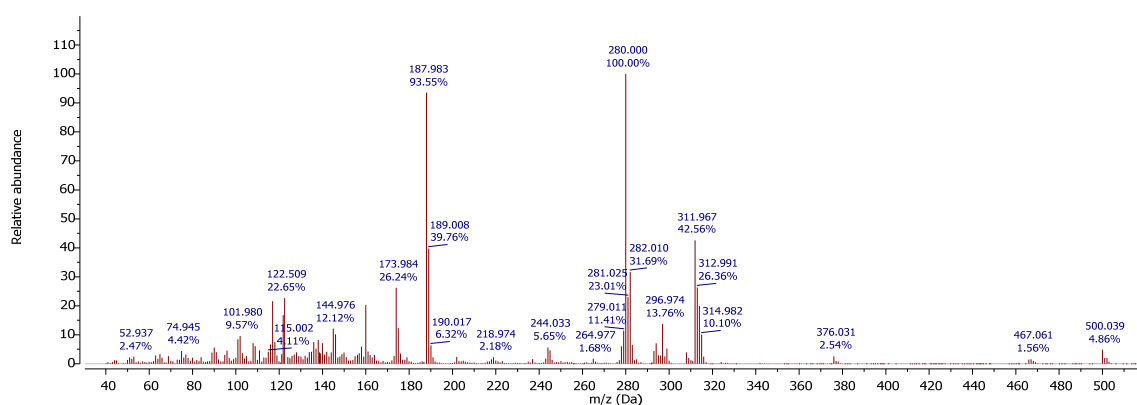

## ESI-QTOF (positive ionization)

MS Zoomed Spectrum

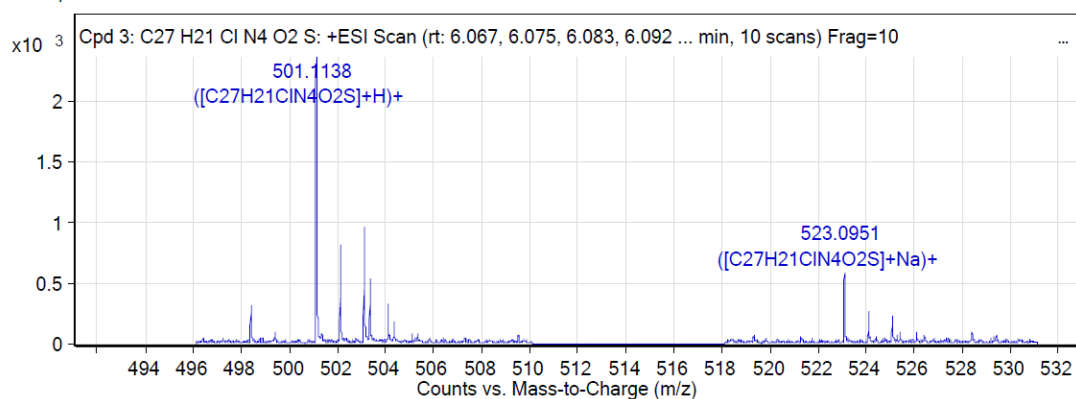

## MS Spectrum Peak List

| m/z      | Calc m/z | Diff(ppm) | z | Abund   | Formula                                                           | Ion                 |
|----------|----------|-----------|---|---------|-------------------------------------------------------------------|---------------------|
| 501.1138 | 501.1147 | 1.65      | 1 | 2387.34 | C <sub>27</sub> H <sub>21</sub> ClN <sub>4</sub> O <sub>2</sub> S | (M+H) <sup>+</sup>  |
| 502.1158 | 502.1176 | 3.64      | 1 | 821.95  | C <sub>27</sub> H <sub>21</sub> ClN <sub>4</sub> O <sub>2</sub> S | (M+H) <sup>+</sup>  |
| 503.1118 | 503.1127 | 1.77      | 1 | 1048.47 | C <sub>27</sub> H <sub>21</sub> ClN <sub>4</sub> O <sub>2</sub> S | (M+H) <sup>+</sup>  |
| 504.1132 | 504.1115 | 3.65      | 1 | 374.25  | C <sub>27</sub> H <sub>21</sub> ClN <sub>4</sub> O <sub>2</sub> S | (M+H) <sup>+</sup>  |
| 505.1054 | 505.1134 | 15.72     | 1 | 25.44   | C <sub>27</sub> H <sub>21</sub> ClN <sub>4</sub> O <sub>2</sub> S | (M+H) <sup>+</sup>  |
| 523.0951 | 523.0966 | 2.88      | 1 | 604.97  | C <sub>27</sub> H <sub>21</sub> ClN <sub>4</sub> O <sub>2</sub> S | (M+Na) <sup>+</sup> |
| 524.099  | 524.0996 | 1.06      | 1 | 291.17  | C <sub>27</sub> H <sub>21</sub> ClN <sub>4</sub> O <sub>2</sub> S | (M+Na) <sup>+</sup> |
| 525.0945 | 525.0946 | 0.31      | 1 | 265.23  | C <sub>27</sub> H <sub>21</sub> ClN <sub>4</sub> O <sub>2</sub> S | (M+Na) <sup>+</sup> |
| 526.0955 | 526.0969 | 2.63      | 1 | 46.9    | C <sub>27</sub> H <sub>21</sub> ClN <sub>4</sub> O <sub>2</sub> S | (M+Na) <sup>+</sup> |



4.14 Compound 25a

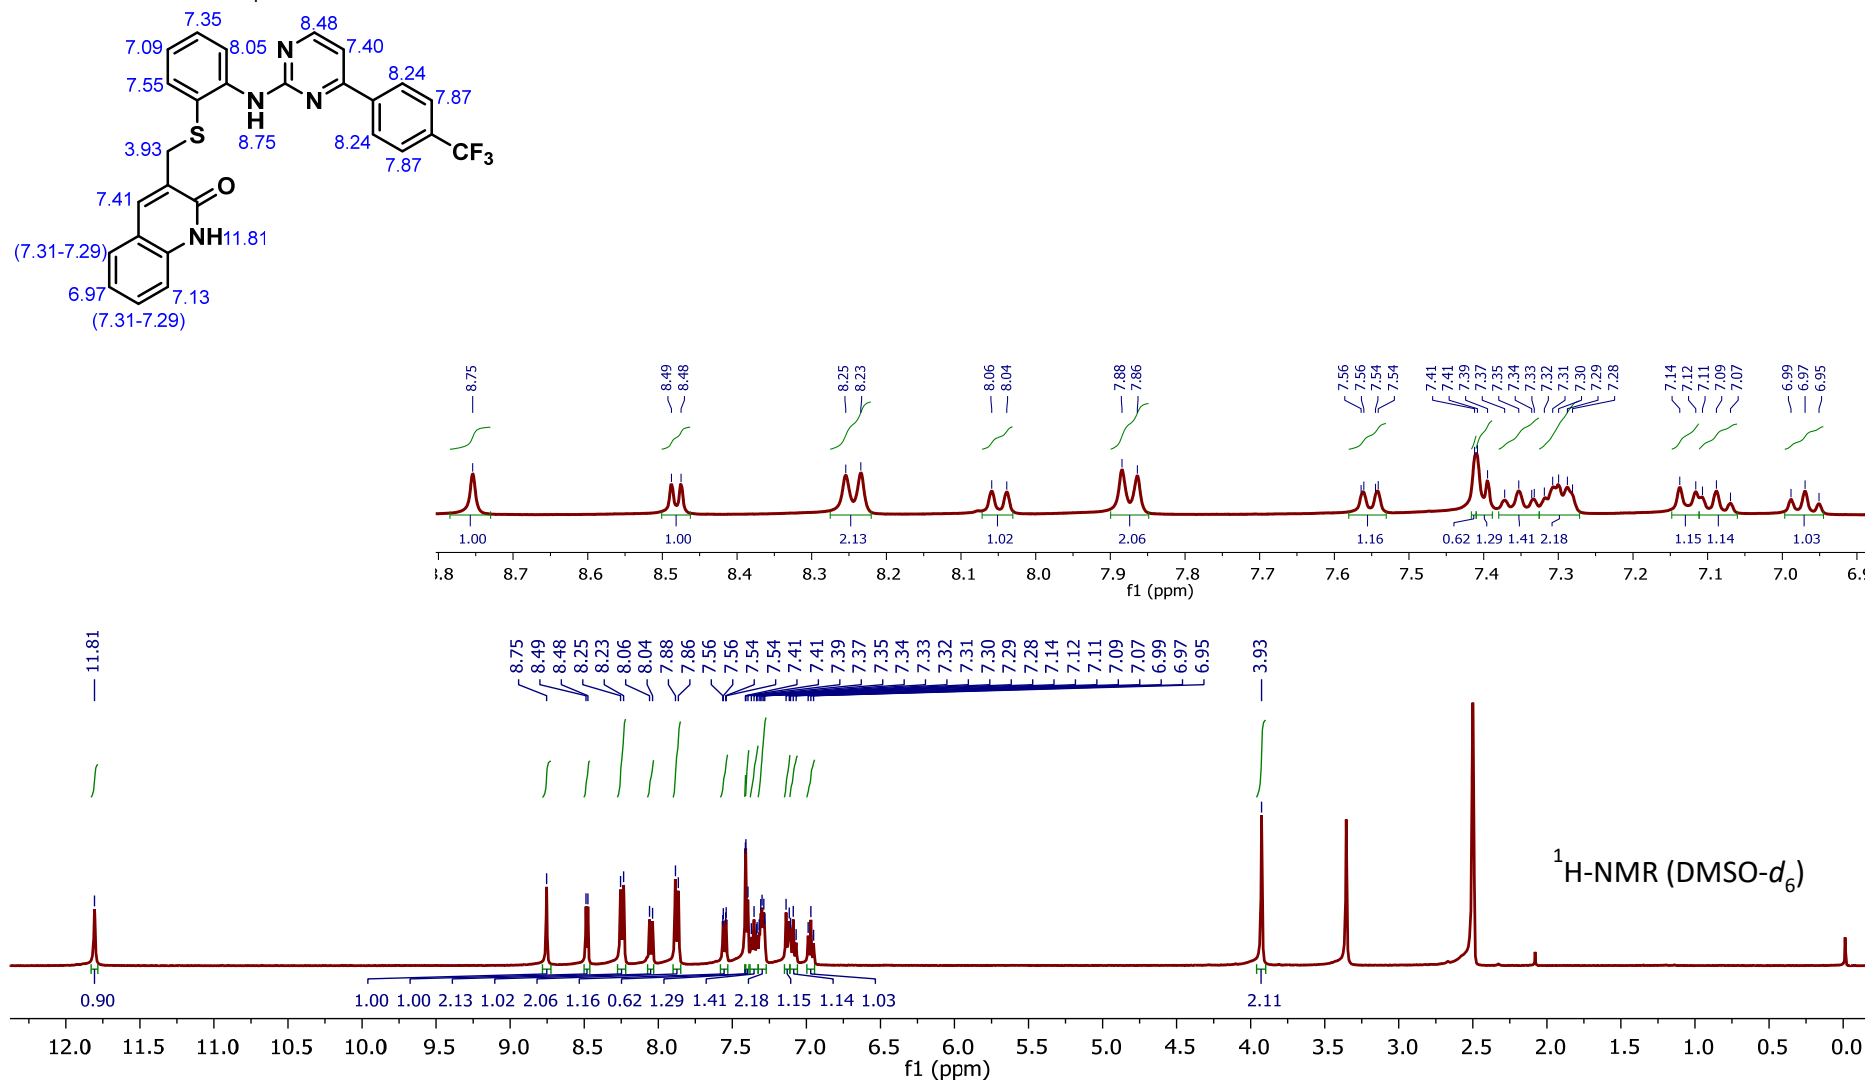

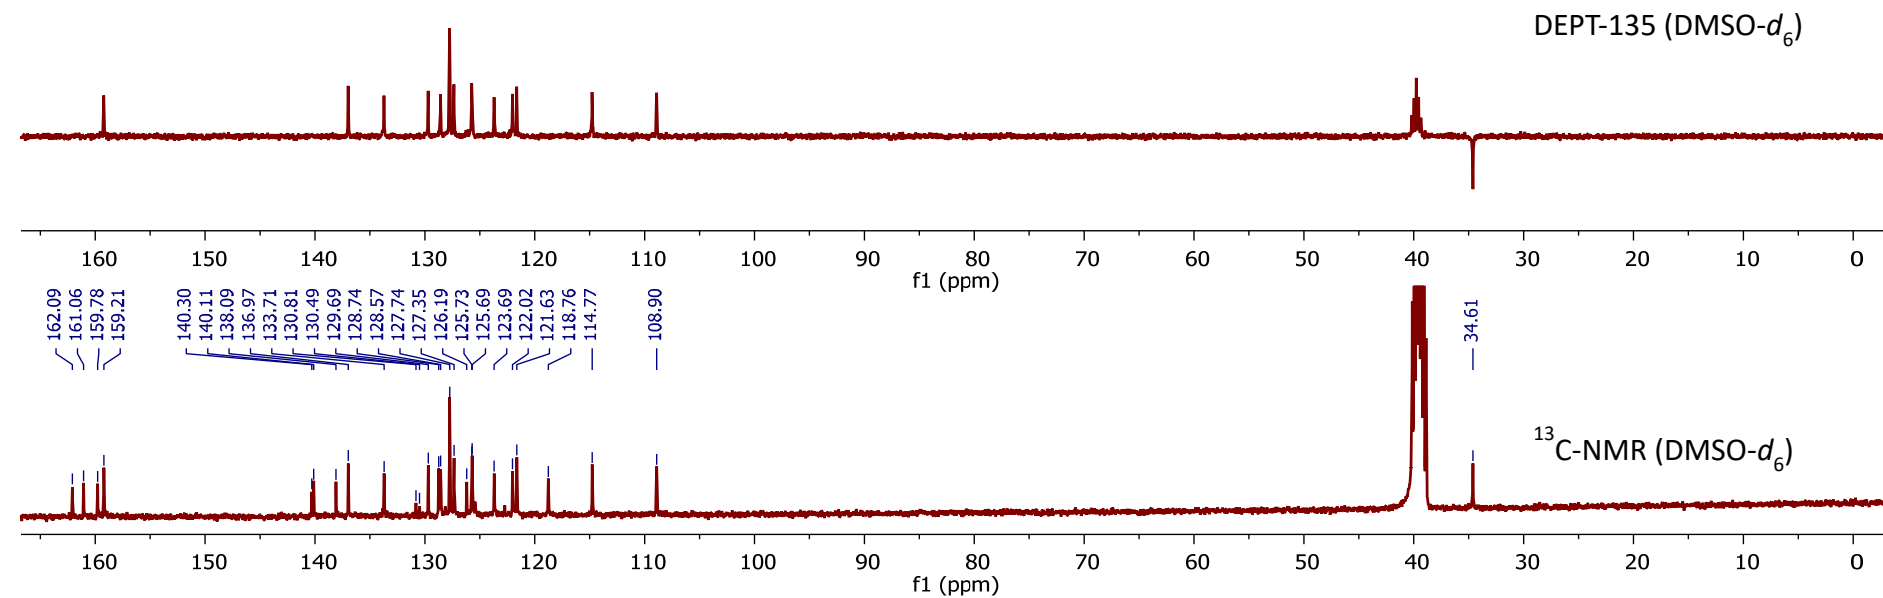

# EI MS (70eV)

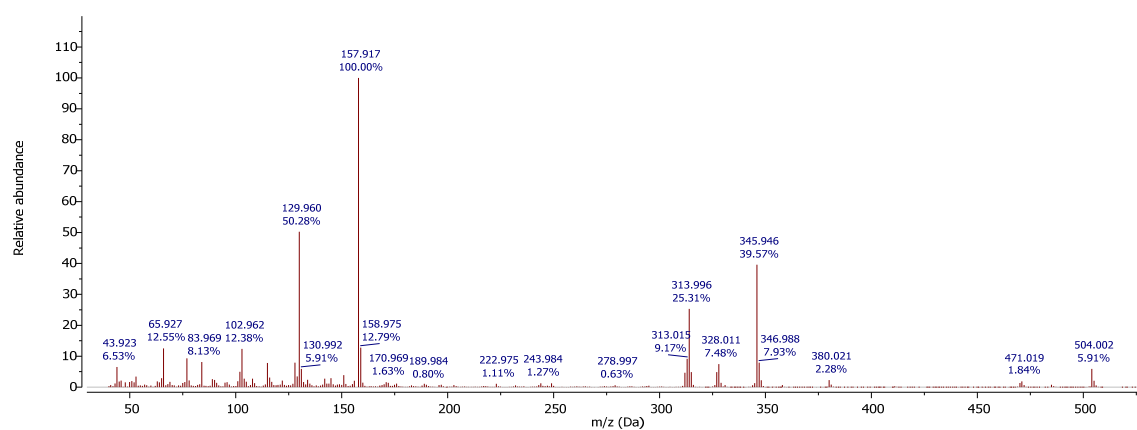

# ESI-QTOF (positive ionization)

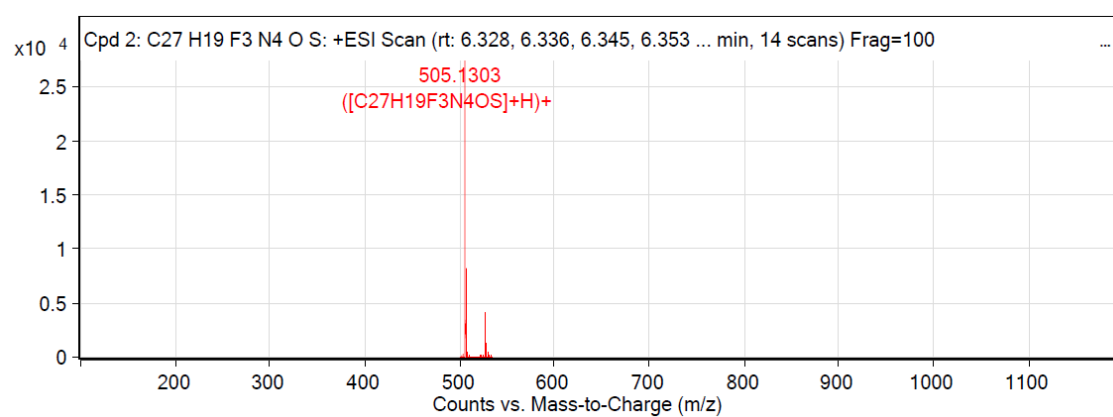

## MS Spectrum Peak List

| m/z      | Calc m/z | Diff(ppm) | z | Abund    | Formula                                                           | Ion                 |
|----------|----------|-----------|---|----------|-------------------------------------------------------------------|---------------------|
| 505.1303 | 505.1304 | 0.2       | 1 | 27882.64 | C <sub>27</sub> H <sub>19</sub> F <sub>3</sub> N <sub>4</sub> O S | (M+H) <sup>+</sup>  |
| 506.1333 | 506.1334 | 0.34      | 1 | 8461.88  | C <sub>27</sub> H <sub>19</sub> F <sub>3</sub> N <sub>4</sub> O S | (M+H) <sup>+</sup>  |
| 507.1315 | 507.1316 | 0.29      | 1 | 2272.03  | C <sub>27</sub> H <sub>19</sub> F <sub>3</sub> N <sub>4</sub> O S | (M+H) <sup>+</sup>  |
| 527.1121 | 527.1124 | 0.55      | 1 | 4178.53  | C <sub>27</sub> H <sub>19</sub> F <sub>3</sub> N <sub>4</sub> O S | (M+Na) <sup>+</sup> |
| 528.1155 | 528.1154 | -0.25     | 1 | 1381.58  | C <sub>27</sub> H <sub>19</sub> F <sub>3</sub> N <sub>4</sub> O S | (M+Na) <sup>+</sup> |
| 529.1131 | 529.1135 | 0.86      | 1 | 367.8    | C <sub>27</sub> H <sub>19</sub> F <sub>3</sub> N <sub>4</sub> O S | (M+Na) <sup>+</sup> |

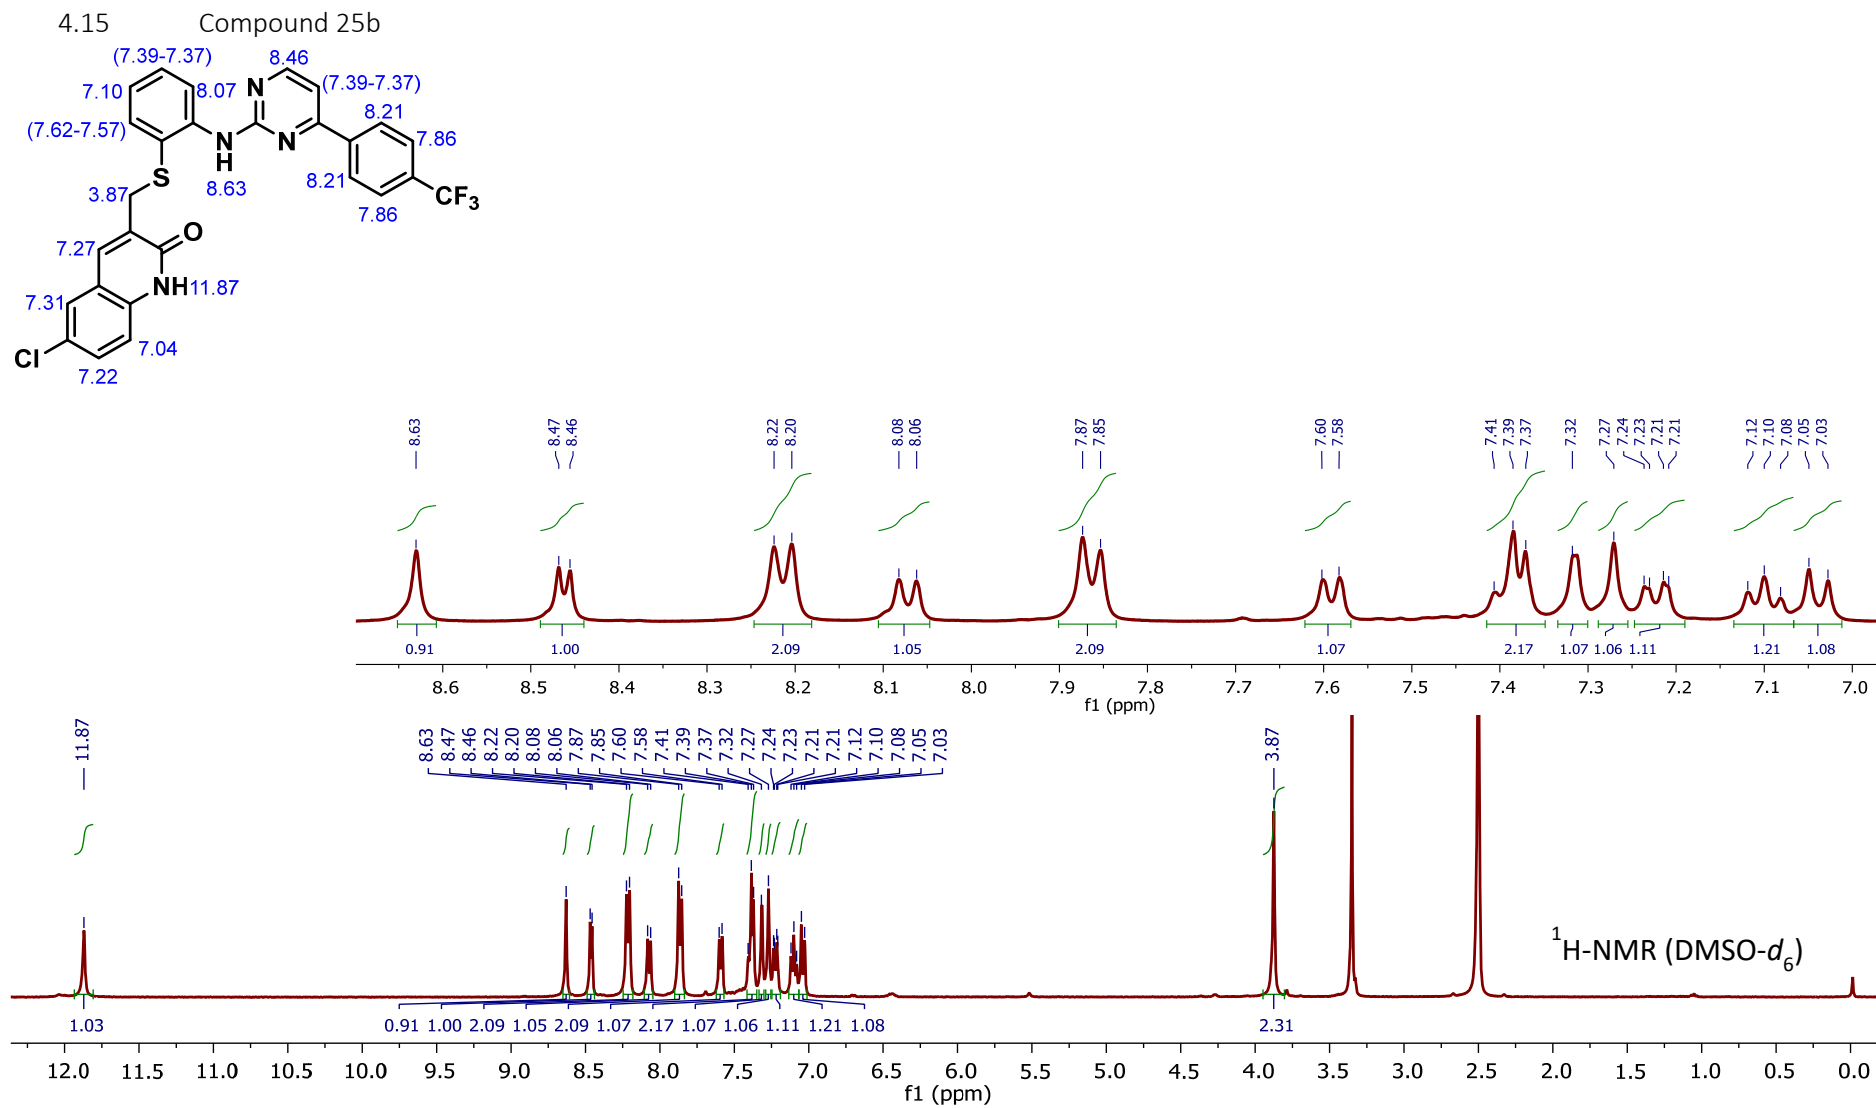

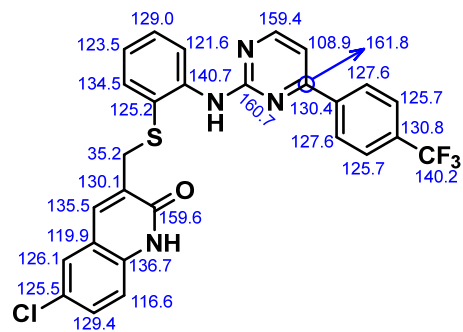

DEPT-135 ( $\text{DMSO}-d_6$ )

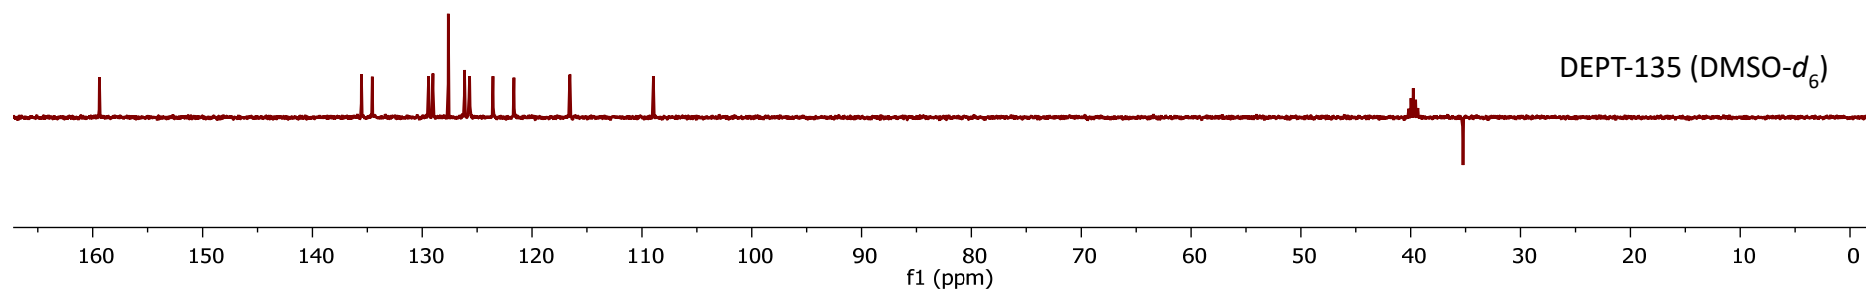

$^{13}\text{C}$ -NMR ( $\text{DMSO}-d_6$ )

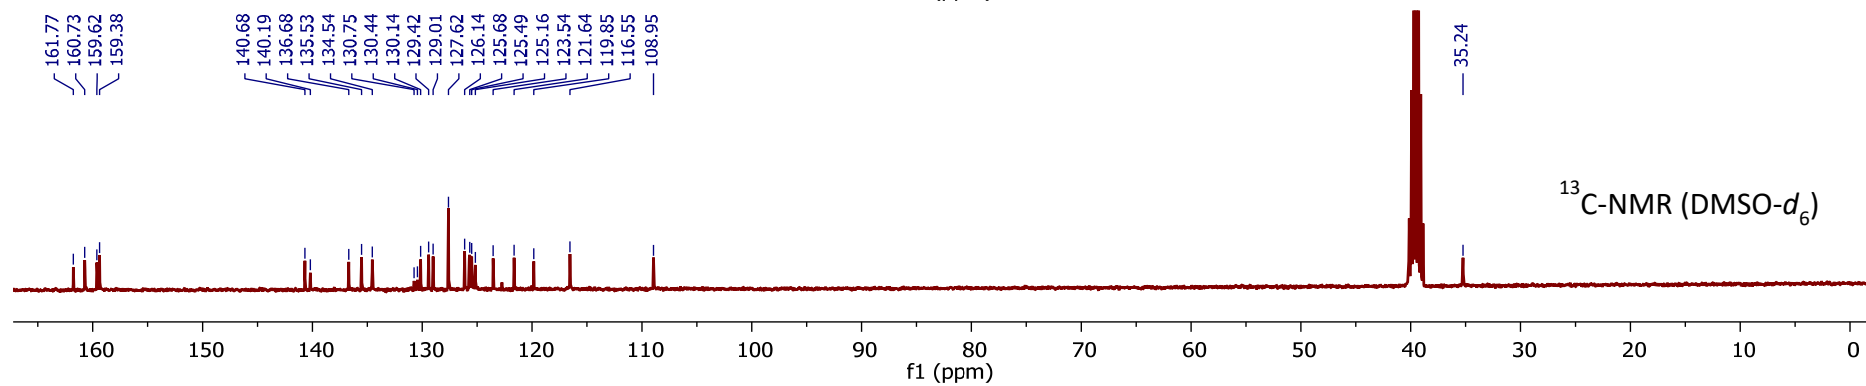

EI MS (70eV)

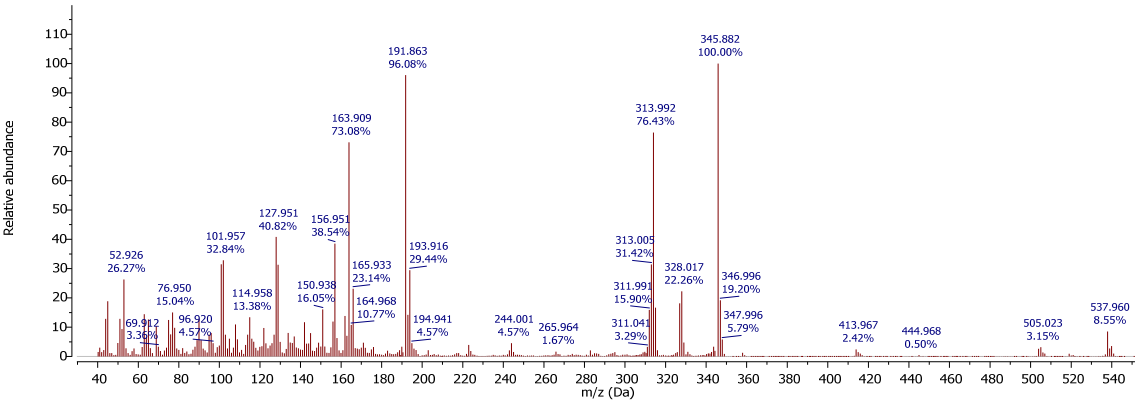

ESI-QTOF (positive ionization)

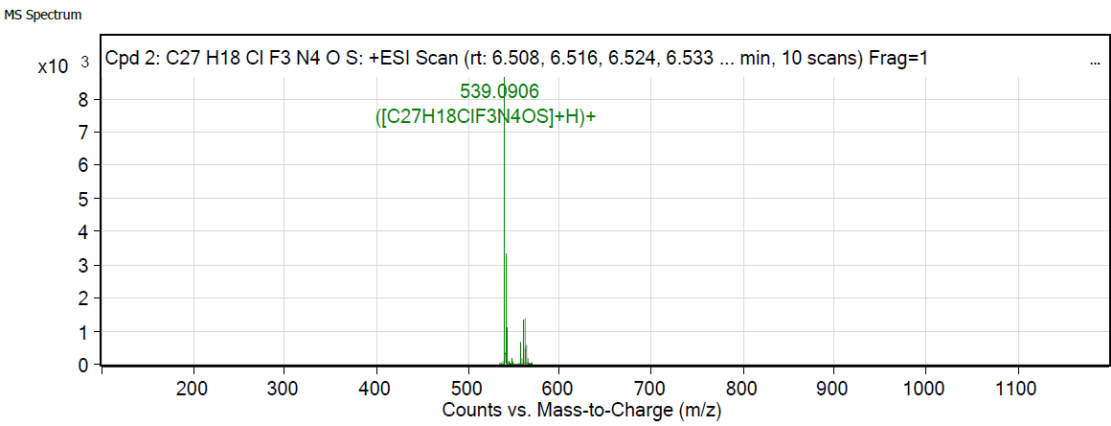

MS Spectrum Peak List

| m/z      | Calc m/z | Diff(ppm) | z | Abund   | Formula                                                            | Ion                 |
|----------|----------|-----------|---|---------|--------------------------------------------------------------------|---------------------|
| 539.0906 | 539.0915 | 1.56      | 1 | 8896.48 | C <sub>27</sub> H <sub>18</sub> ClF <sub>3</sub> N <sub>4</sub> OS | (M+H) <sup>+</sup>  |
| 540.093  | 540.0945 | 2.7       | 1 | 2820.27 | C <sub>27</sub> H <sub>18</sub> ClF <sub>3</sub> N <sub>4</sub> OS | (M+H) <sup>+</sup>  |
| 541.0885 | 541.0895 | 1.72      | 1 | 3407.42 | C <sub>27</sub> H <sub>18</sub> ClF <sub>3</sub> N <sub>4</sub> OS | (M+H) <sup>+</sup>  |
| 542.0903 | 542.0918 | 2.72      | 1 | 1135.08 | C <sub>27</sub> H <sub>18</sub> ClF <sub>3</sub> N <sub>4</sub> OS | (M+H) <sup>+</sup>  |
| 543.0903 | 543.0901 | -0.48     | 1 | 221.11  | C <sub>27</sub> H <sub>18</sub> ClF <sub>3</sub> N <sub>4</sub> OS | (M+H) <sup>+</sup>  |
| 561.0729 | 561.0734 | 0.87      | 1 | 1409.61 | C <sub>27</sub> H <sub>18</sub> ClF <sub>3</sub> N <sub>4</sub> OS | (M+Na) <sup>+</sup> |
| 562.0749 | 562.0764 | 2.71      | 1 | 497.96  | C <sub>27</sub> H <sub>18</sub> ClF <sub>3</sub> N <sub>4</sub> OS | (M+Na) <sup>+</sup> |
| 563.071  | 563.0714 | 0.77      | 1 | 598.91  | C <sub>27</sub> H <sub>18</sub> ClF <sub>3</sub> N <sub>4</sub> OS | (M+Na) <sup>+</sup> |
| 564.0688 | 564.0737 | 8.76      | 1 | 130.54  | C <sub>27</sub> H <sub>18</sub> ClF <sub>3</sub> N <sub>4</sub> OS | (M+Na) <sup>+</sup> |
| 565.0657 | 565.072  | 11.26     | 1 | 21.71   | C <sub>27</sub> H <sub>18</sub> ClF <sub>3</sub> N <sub>4</sub> OS | (M+Na) <sup>+</sup> |

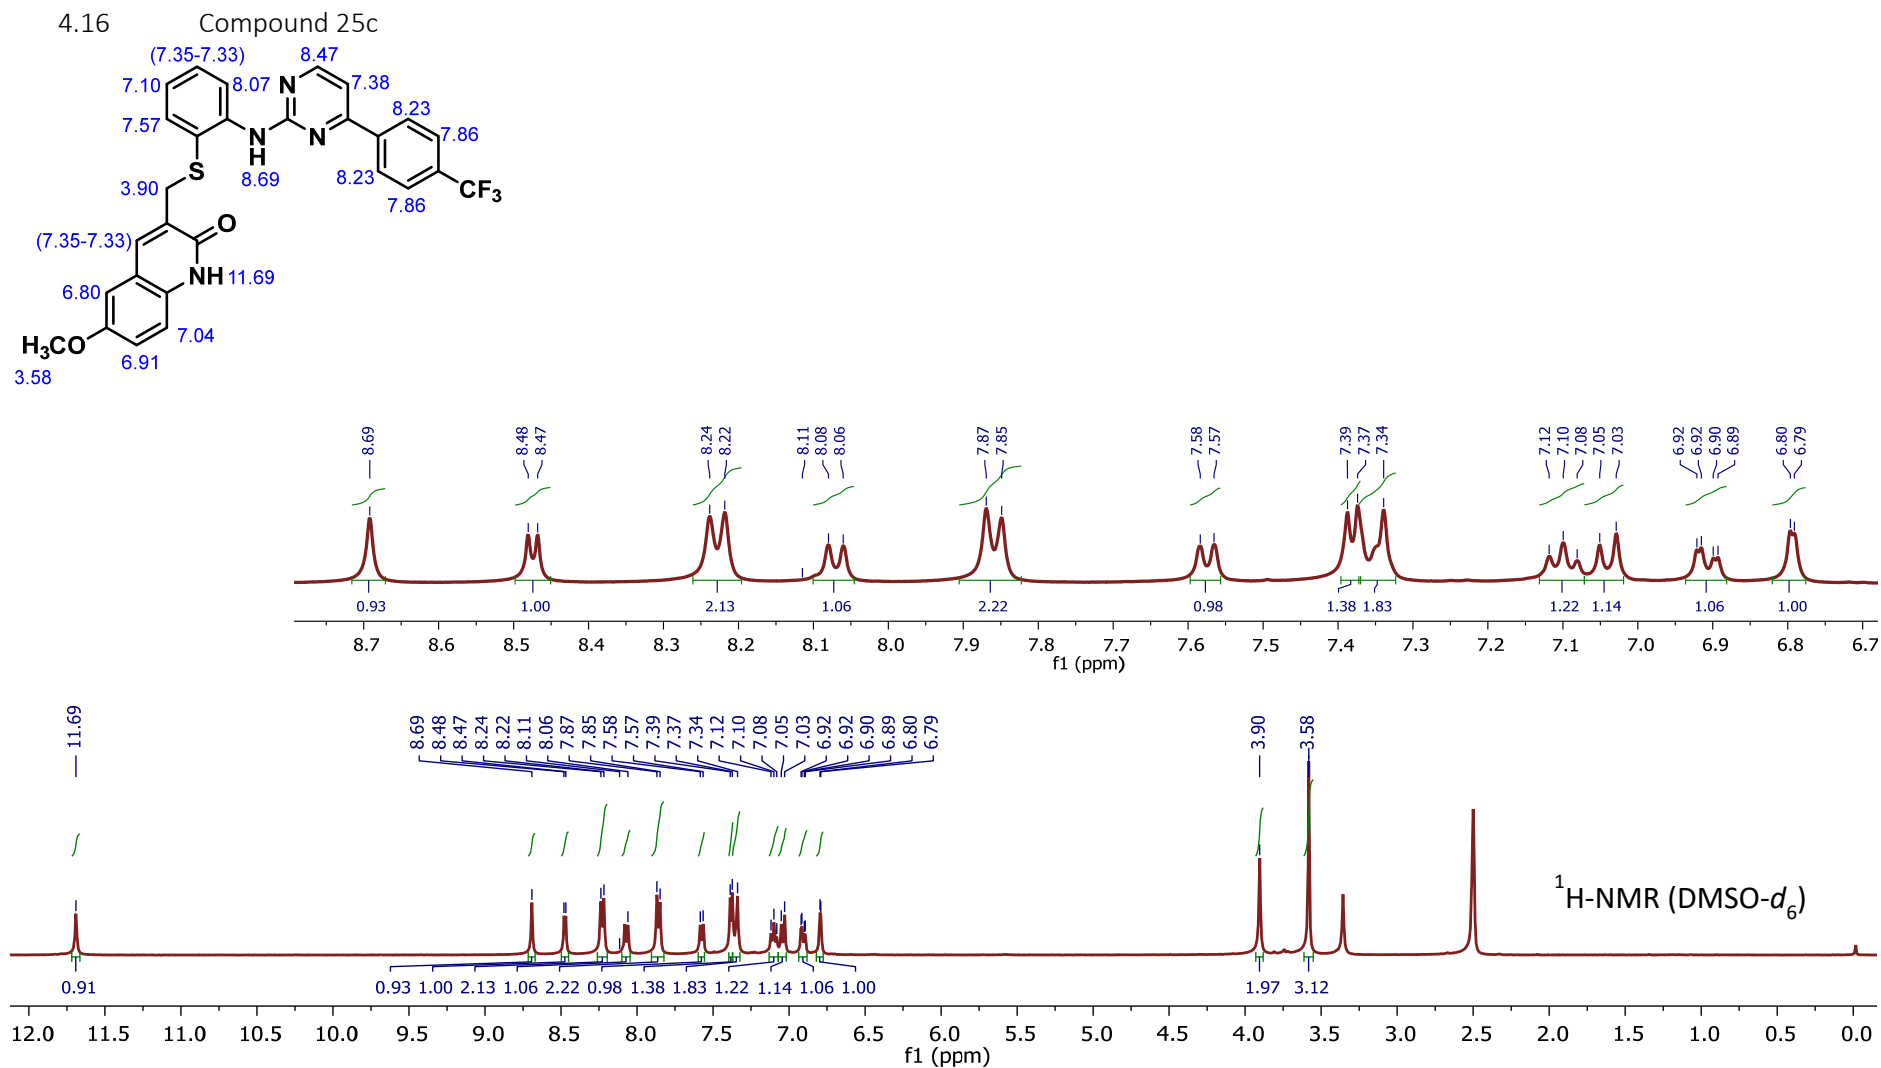

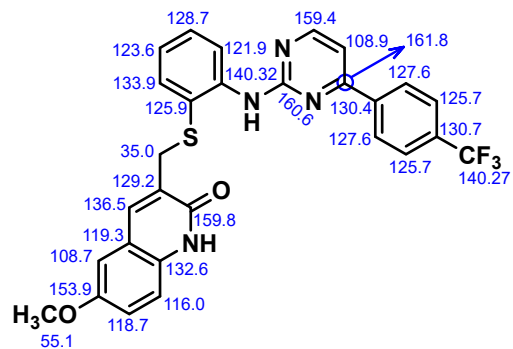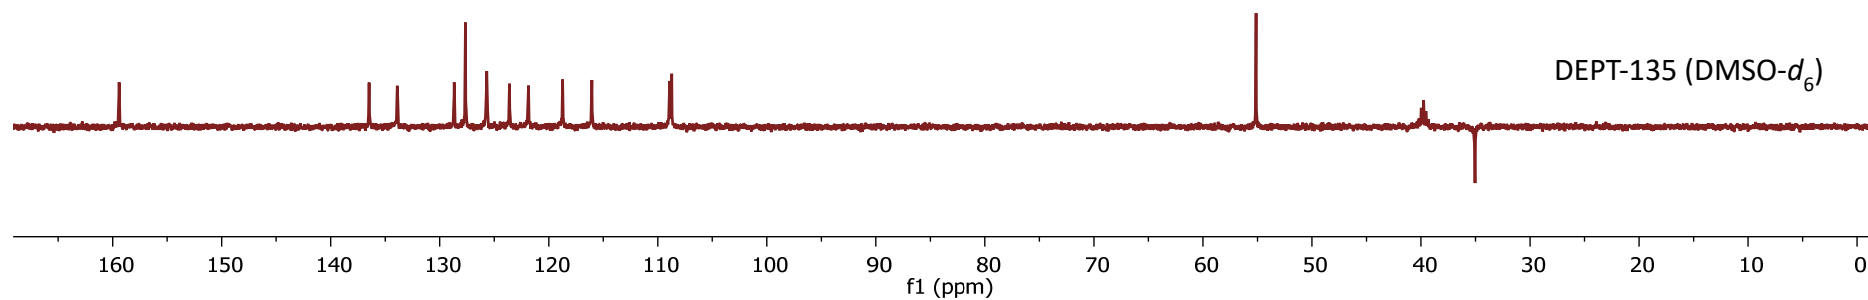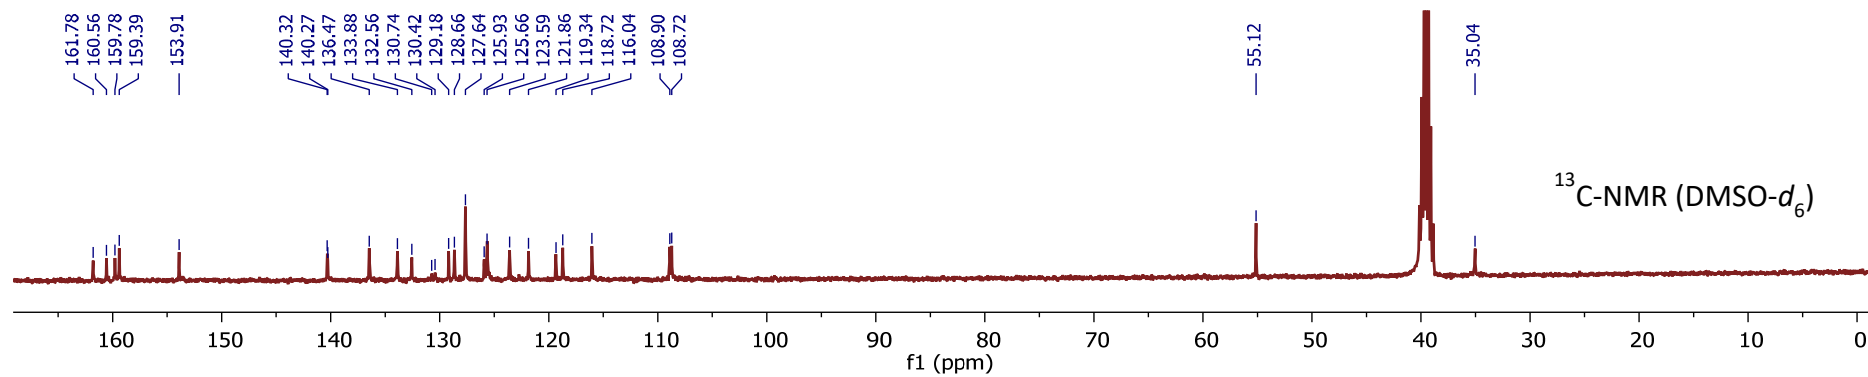



## EI MS (70eV)

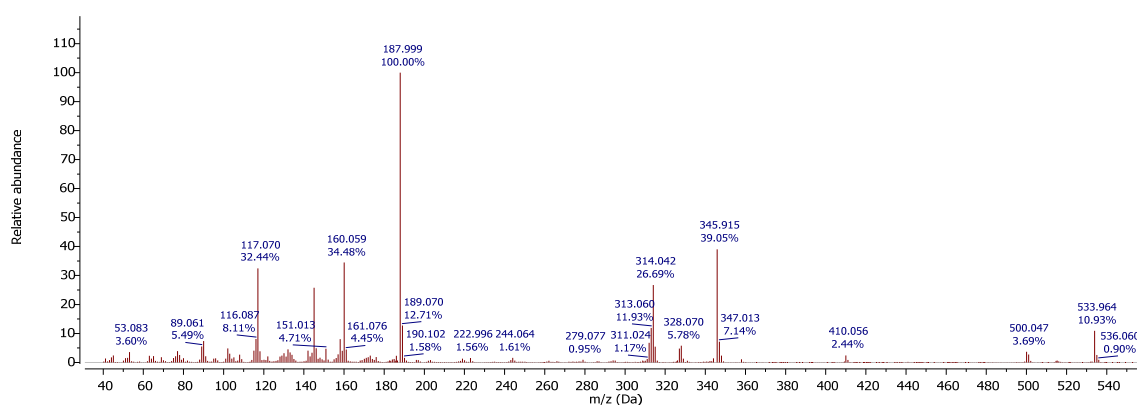

## ESI-QTOF (positive ionization)

MS Zoomed Spectrum

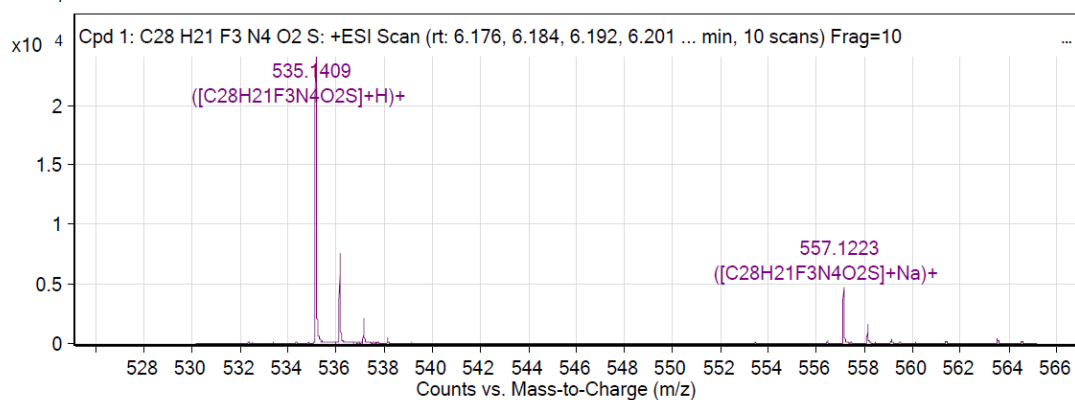

### MS Spectrum Peak List

| m/z      | Calc m/z | Diff(ppm) | z | Abund    | Formula       | Ion     |
|----------|----------|-----------|---|----------|---------------|---------|
| 535.1409 | 535.141  | 0.18      | 1 | 24069.29 | C28H21F3N4O2S | (M+H)+  |
| 536.1441 | 536.144  | -0.1      | 1 | 7805.41  | C28H21F3N4O2S | (M+H)+  |
| 537.1434 | 537.1424 | -1.76     | 1 | 2137.66  | C28H21F3N4O2S | (M+H)+  |
| 557.1223 | 557.123  | 1.13      | 1 | 4818.09  | C28H21F3N4O2S | (M+Na)+ |
| 558.1259 | 558.126  | 0.08      | 1 | 1598.05  | C28H21F3N4O2S | (M+Na)+ |
| 559.1254 | 559.1244 | -1.85     | 1 | 469.72   | C28H21F3N4O2S | (M+Na)+ |
| 560.1218 | 560.1249 | 5.6       | 1 | 46.38    | C28H21F3N4O2S | (M+Na)+ |

4.17 Compound 26a

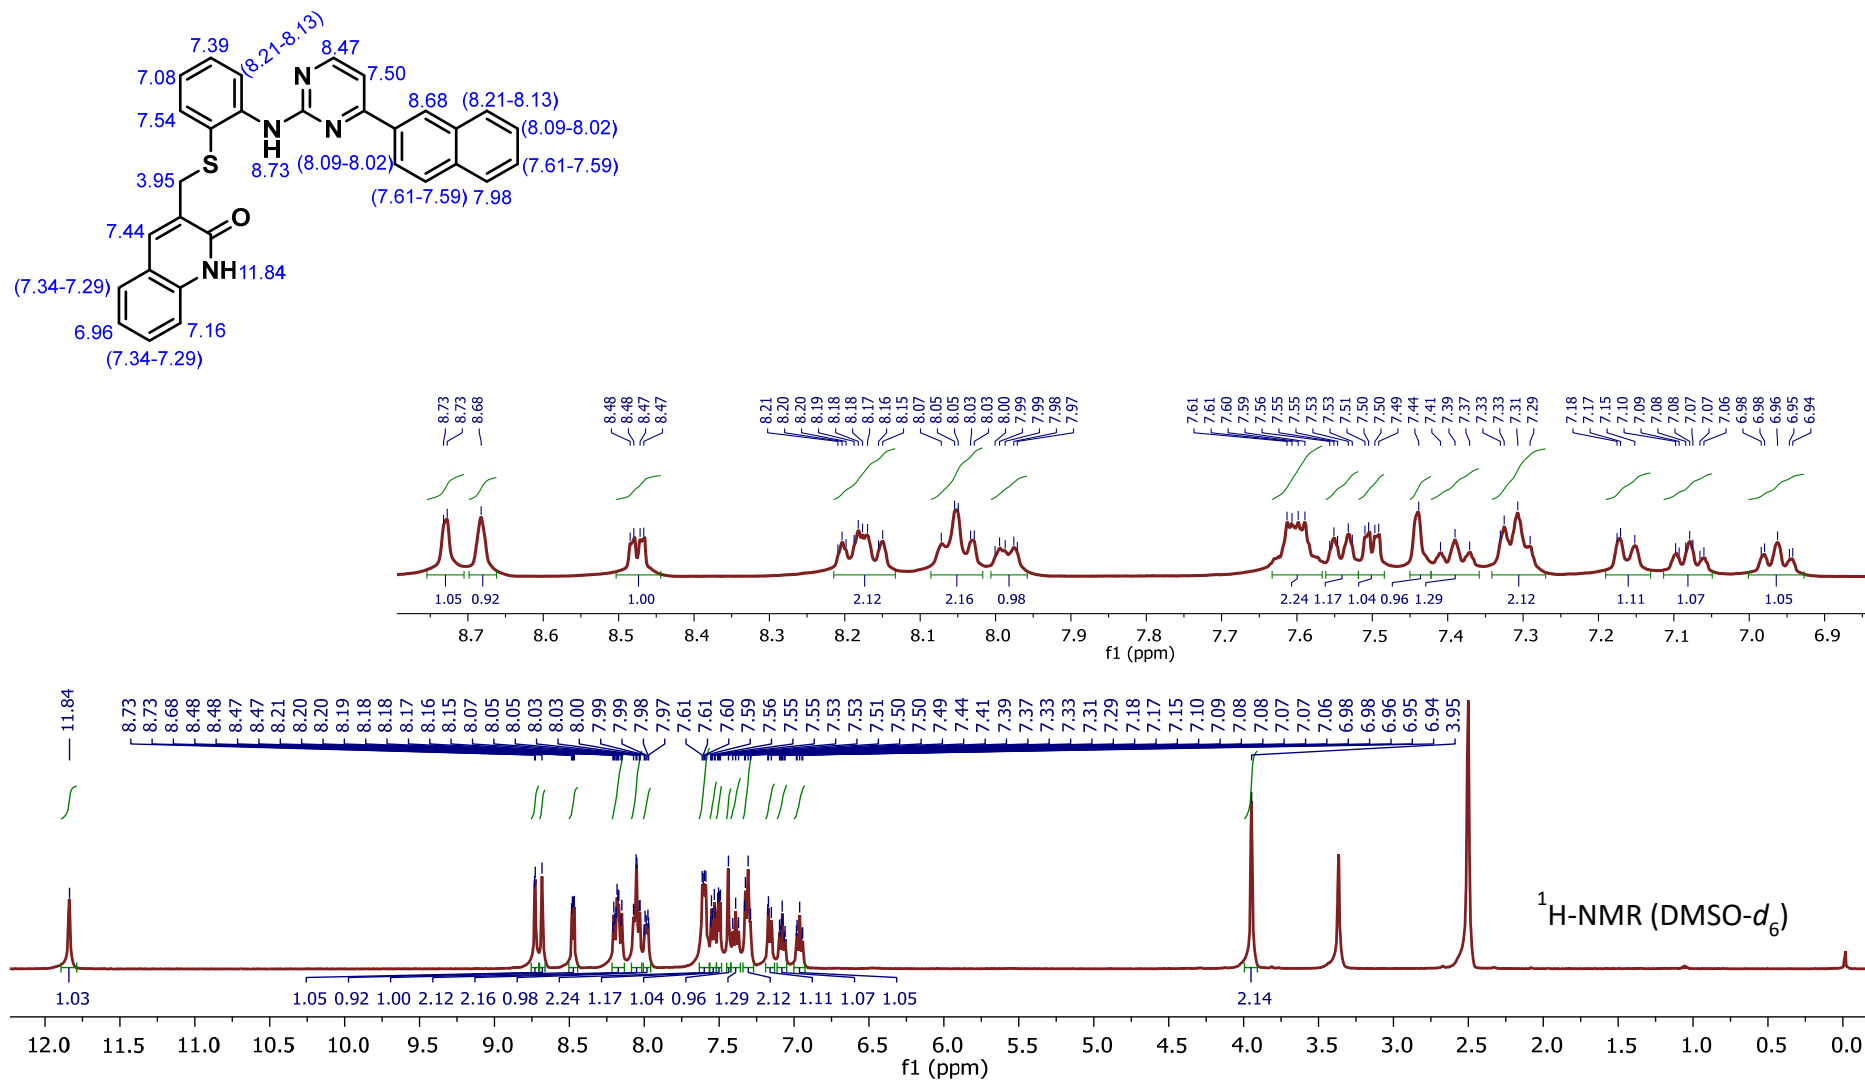

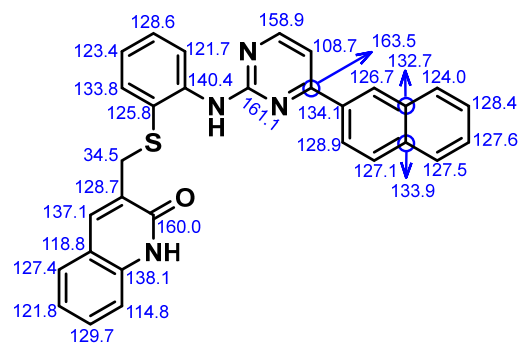

DEPT-135 ( $\text{DMSO}-d_6$ )

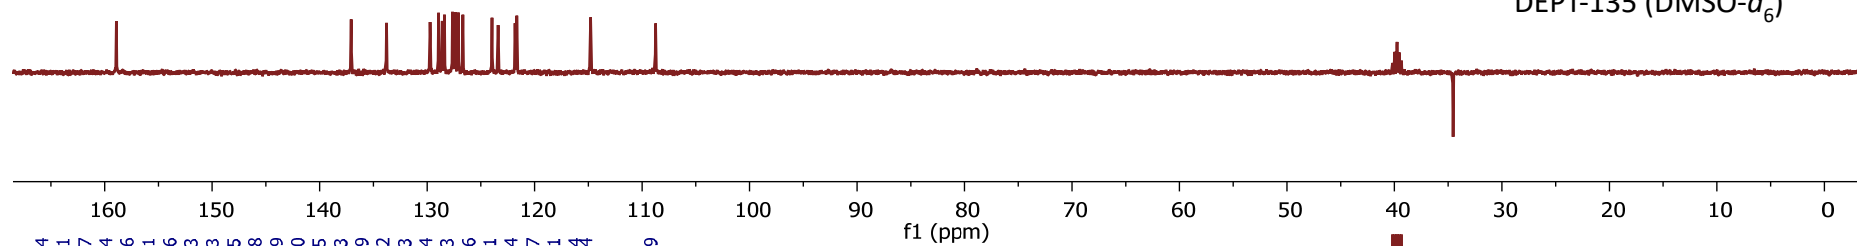

$^{13}\text{C}$ -NMR ( $\text{DMSO}-d_6$ )

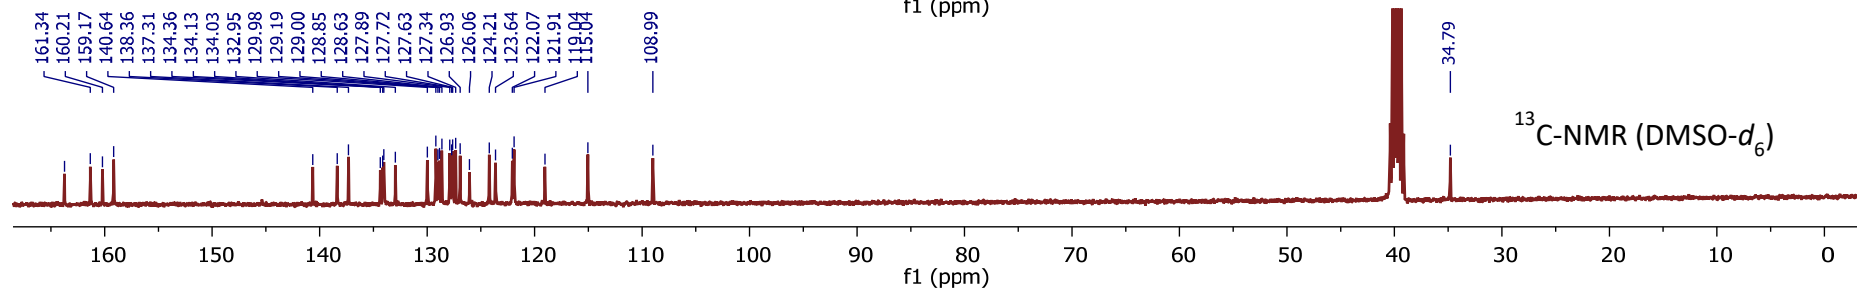

EI MS (70eV)

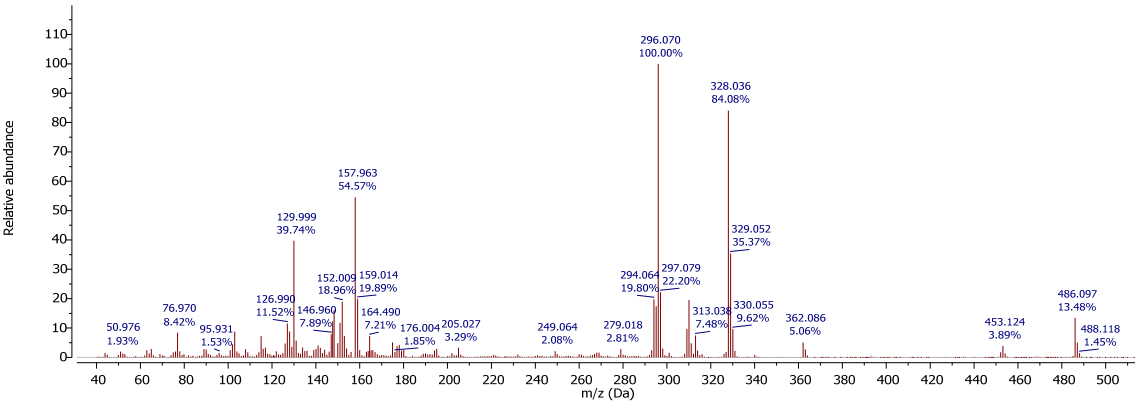

ESI-QTOF (positive ionization)

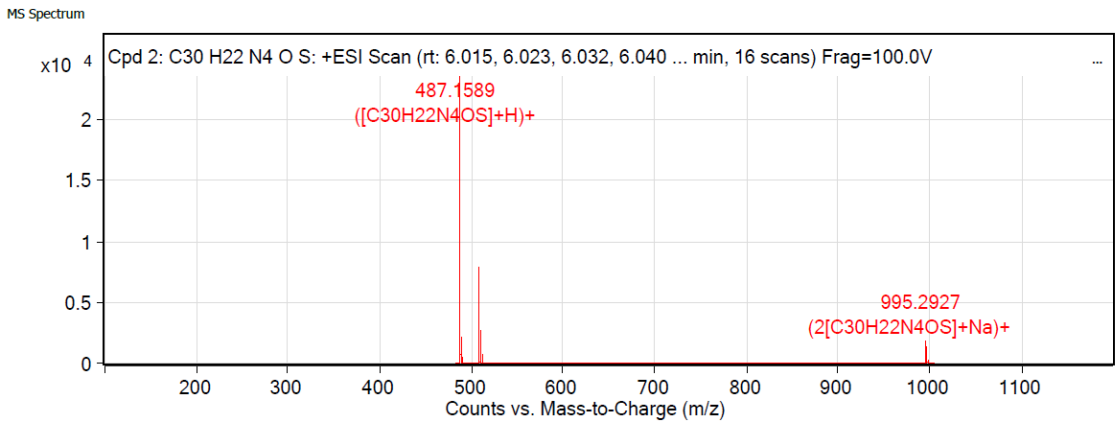

MS Spectrum Peak List

| m/z      | Calc m/z | Diff(ppm) | z | Abund    | Formula                                           | Ion      |
|----------|----------|-----------|---|----------|---------------------------------------------------|----------|
| 487.1589 | 487.1587 | -0.29     | 1 | 23642.65 | C <sub>30</sub> H <sub>22</sub> N <sub>4</sub> OS | (M+H)+   |
| 488.162  | 488.1617 | -0.58     | 1 | 8337.6   | C <sub>30</sub> H <sub>22</sub> N <sub>4</sub> OS | (M+H)+   |
| 489.1609 | 489.1604 | -1.05     | 1 | 2287.91  | C <sub>30</sub> H <sub>22</sub> N <sub>4</sub> OS | (M+H)+   |
| 509.1406 | 509.1407 | 0.17      | 1 | 7921.39  | C <sub>30</sub> H <sub>22</sub> N <sub>4</sub> OS | (M+Na)+  |
| 510.1437 | 510.1437 | -0.14     | 1 | 2736.4   | C <sub>30</sub> H <sub>22</sub> N <sub>4</sub> OS | (M+Na)+  |
| 511.1429 | 511.1423 | -1.19     | 1 | 797.99   | C <sub>30</sub> H <sub>22</sub> N <sub>4</sub> OS | (M+Na)+  |
| 995.2927 | 995.2921 | -0.6      | 1 | 1972.33  | C <sub>30</sub> H <sub>22</sub> N <sub>4</sub> OS | (2M+Na)+ |
| 996.2959 | 996.2951 | -0.79     | 1 | 1423.17  | C <sub>30</sub> H <sub>22</sub> N <sub>4</sub> OS | (2M+Na)+ |
| 997.2974 | 997.2954 | -2.07     | 1 | 597.2    | C <sub>30</sub> H <sub>22</sub> N <sub>4</sub> OS | (2M+Na)+ |
| 998.2967 | 998.2958 | -0.88     | 1 | 239.26   | C <sub>30</sub> H <sub>22</sub> N <sub>4</sub> OS | (2M+Na)+ |

4.18 Compound 26b

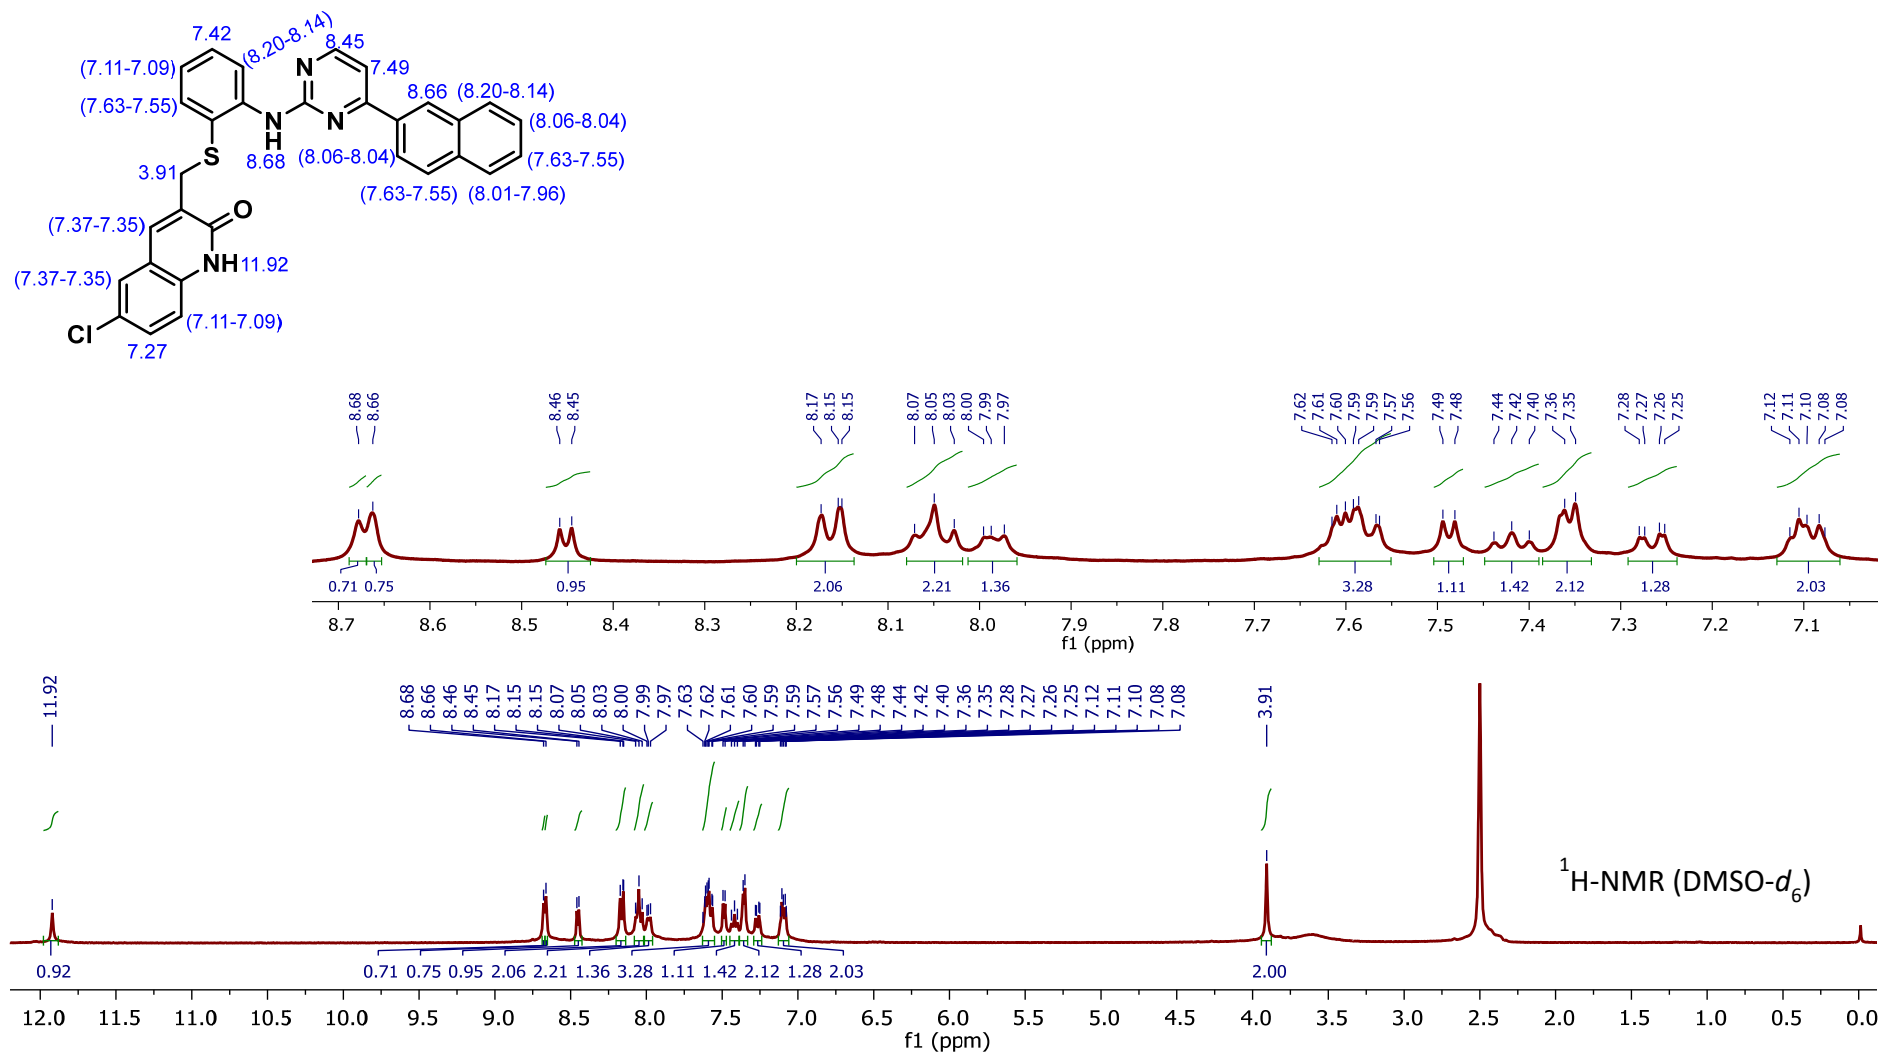

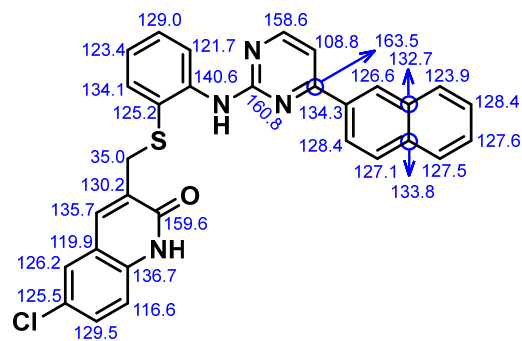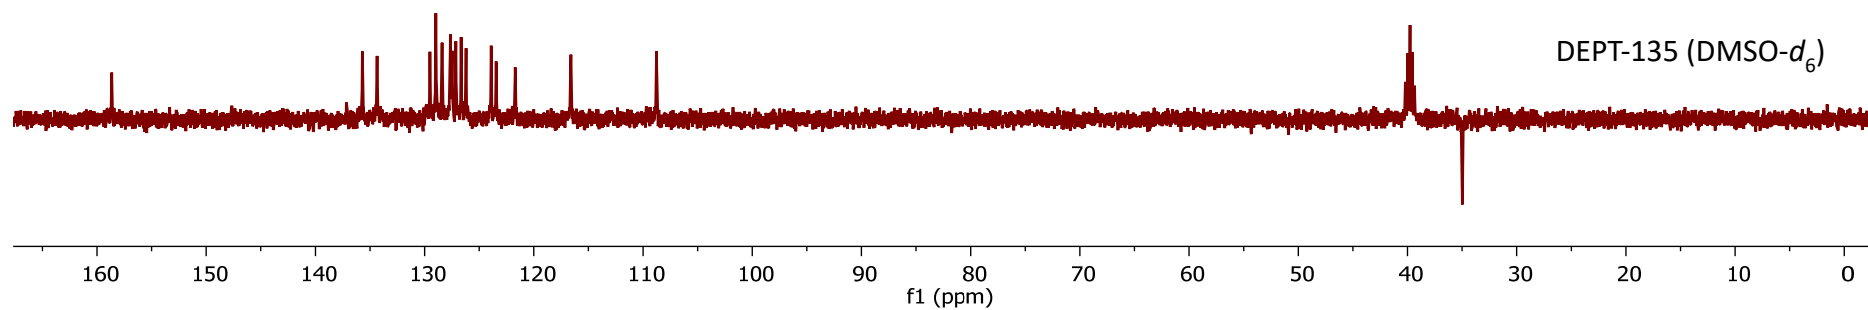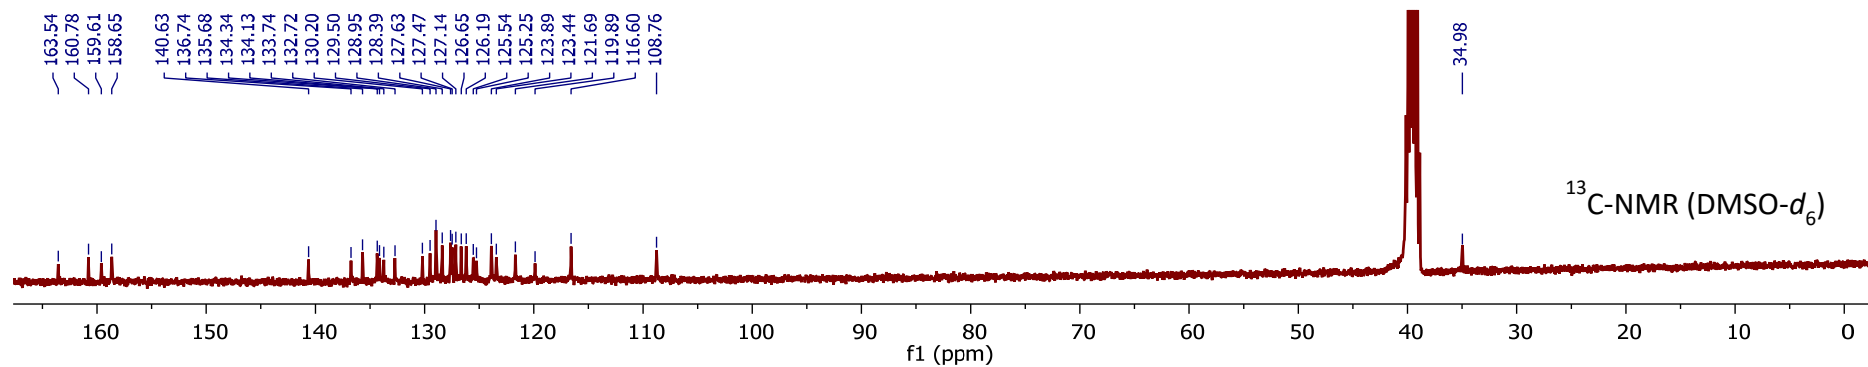

## EI MS (70eV)

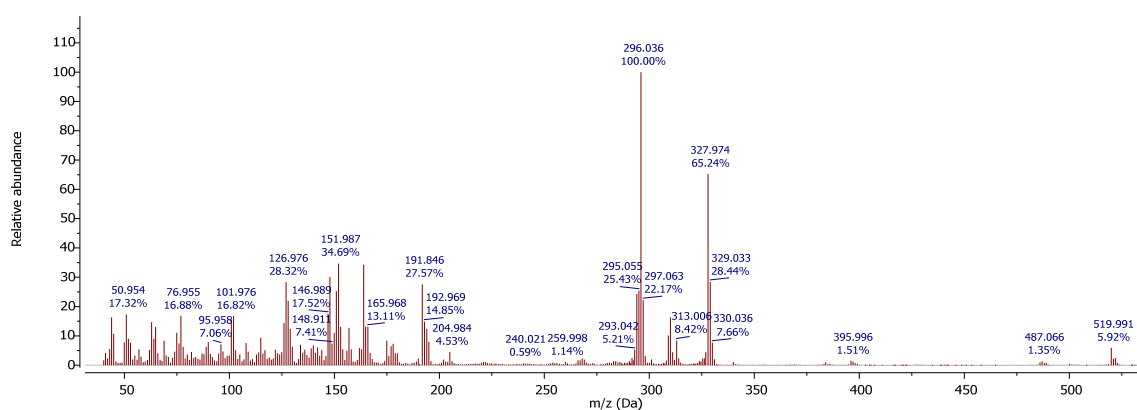

## ESI-QTOF (positive ionization)

MS Spectrum

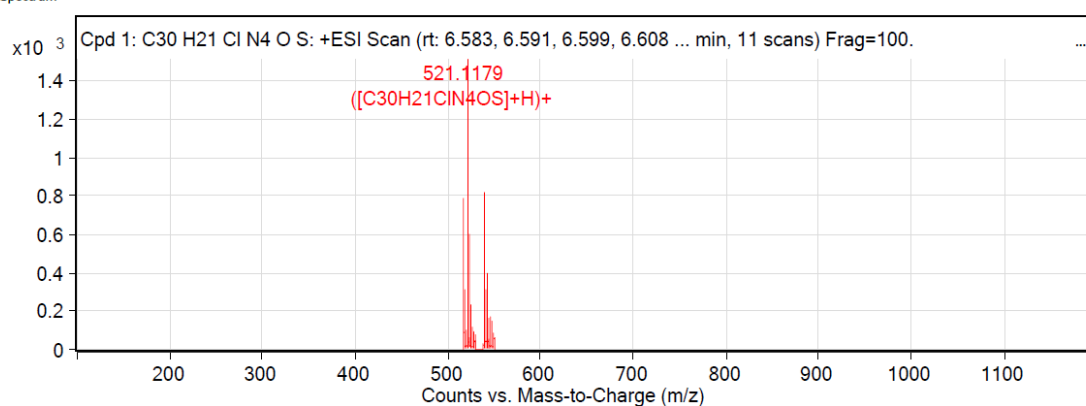

### MS Spectrum Peak List

| m/z      | Calc m/z | Diff(ppm) | z | Abund   | Formula                                                         | Ion                 |
|----------|----------|-----------|---|---------|-----------------------------------------------------------------|---------------------|
| 521.1179 | 521.1197 | 3.47      | 1 | 1600.01 | C <sub>30</sub> H <sub>21</sub> ClN <sub>4</sub> O <sub>5</sub> | (M+H) <sup>+</sup>  |
| 522.1209 | 522.1228 | 3.62      | 1 | 533.33  | C <sub>30</sub> H <sub>21</sub> ClN <sub>4</sub> O <sub>5</sub> | (M+H) <sup>+</sup>  |
| 523.1181 | 523.1179 | -0.37     | 1 | 610.94  | C <sub>30</sub> H <sub>21</sub> ClN <sub>4</sub> O <sub>5</sub> | (M+H) <sup>+</sup>  |
| 524.1182 | 524.1201 | 3.75      | 1 | 212.57  | C <sub>30</sub> H <sub>21</sub> ClN <sub>4</sub> O <sub>5</sub> | (M+H) <sup>+</sup>  |
| 525.1234 | 525.1189 | -8.57     | 1 | 48.47   | C <sub>30</sub> H <sub>21</sub> ClN <sub>4</sub> O <sub>5</sub> | (M+H) <sup>+</sup>  |
| 543.1007 | 543.1017 | 1.8       | 1 | 407.77  | C <sub>30</sub> H <sub>21</sub> ClN <sub>4</sub> O <sub>5</sub> | (M+Na) <sup>+</sup> |
| 544.1089 | 544.1047 | -7.63     | 1 | 128.08  | C <sub>30</sub> H <sub>21</sub> ClN <sub>4</sub> O <sub>5</sub> | (M+Na) <sup>+</sup> |
| 545.0977 | 545.0999 | 4.04      | 1 | 142.36  | C <sub>30</sub> H <sub>21</sub> ClN <sub>4</sub> O <sub>5</sub> | (M+Na) <sup>+</sup> |

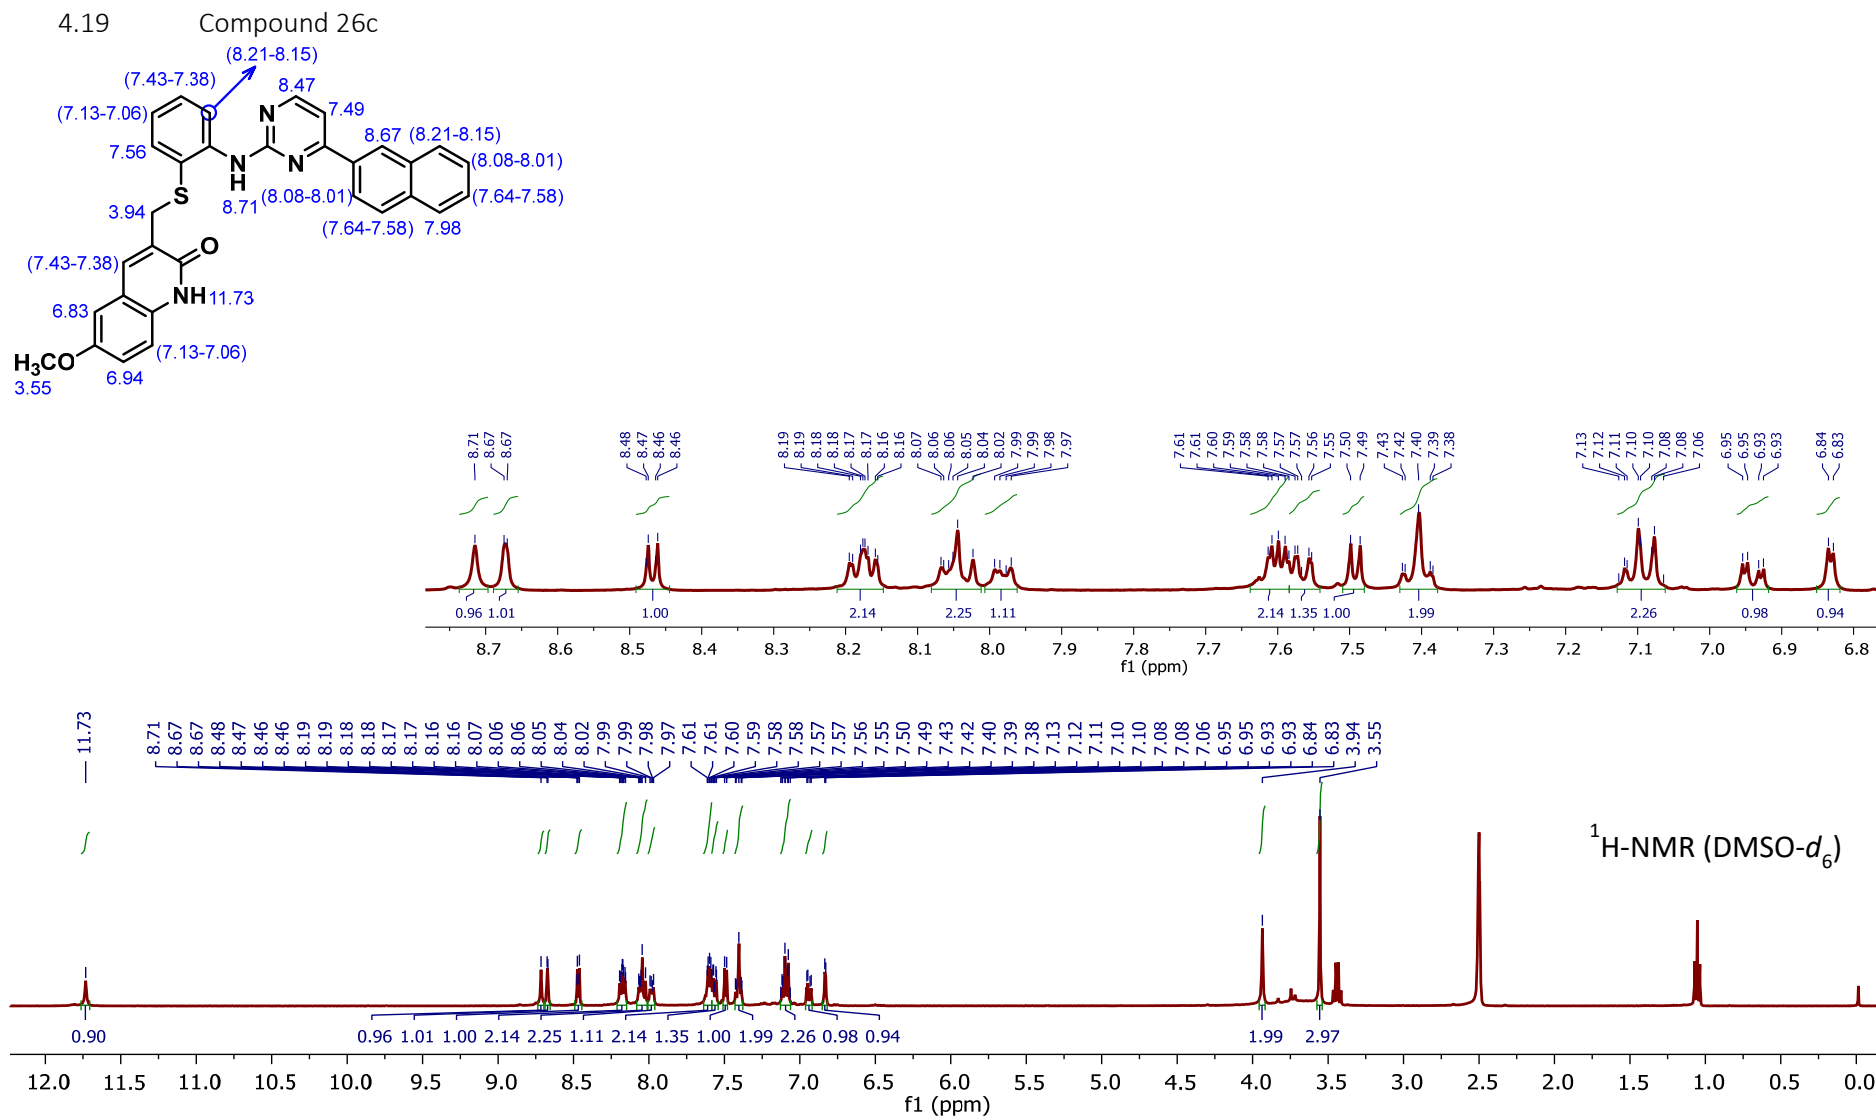



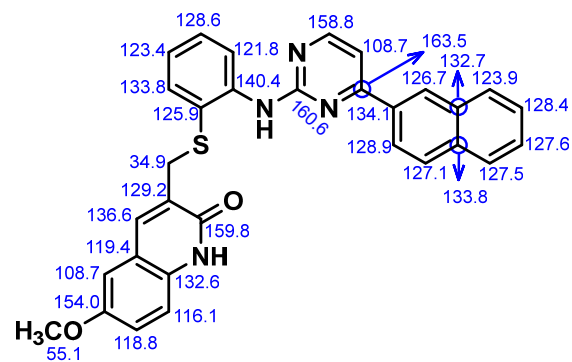

DEPT-135 (DMSO- $d_6$ )

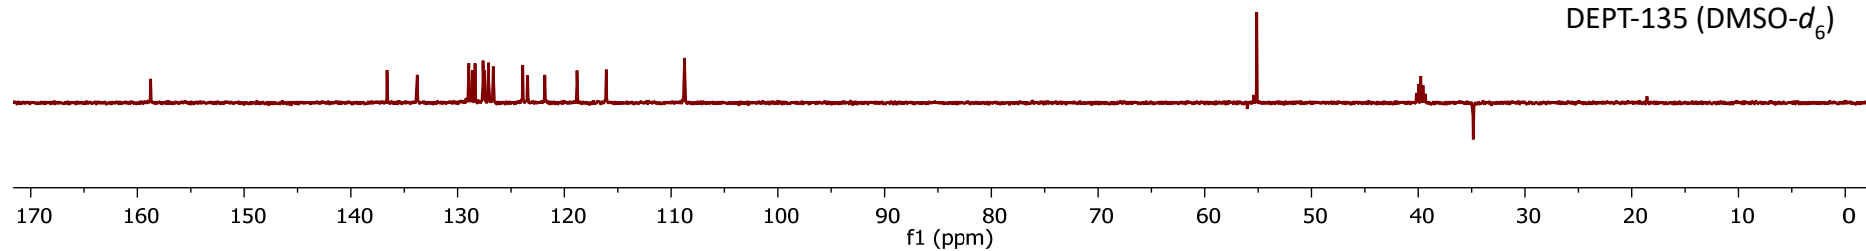

$^{13}\text{C}$ -NMR (DMSO- $d_6$ )

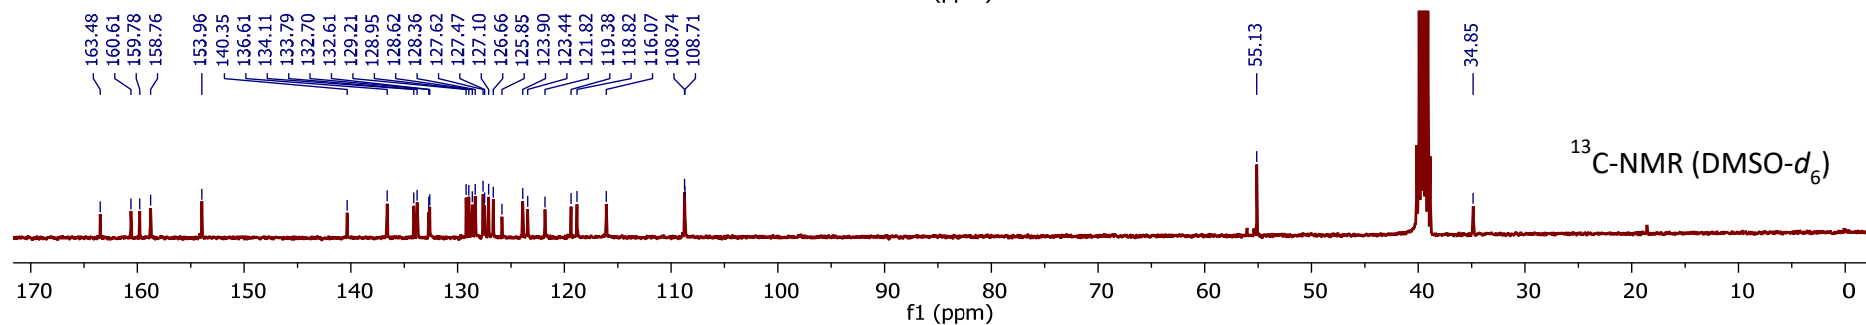

## EI MS (70eV)

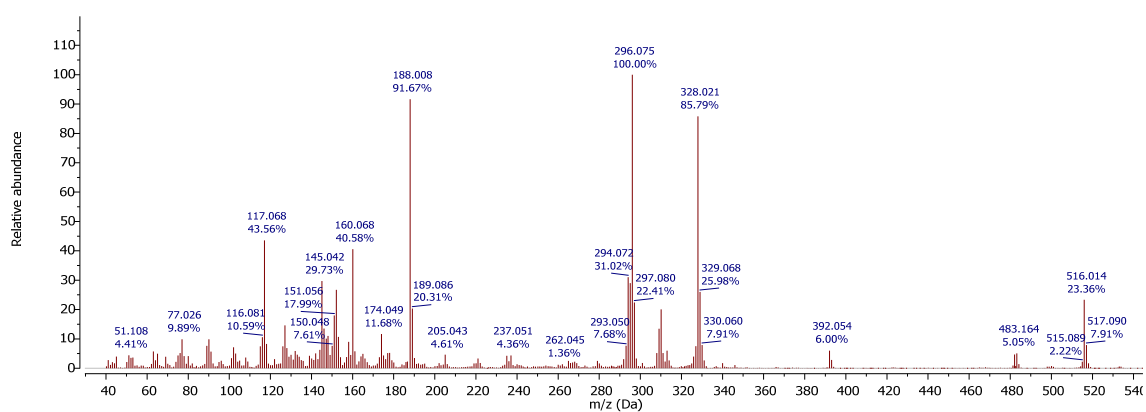

## ESI-QTOF (positive ionization)

MS Zoomed Spectrum

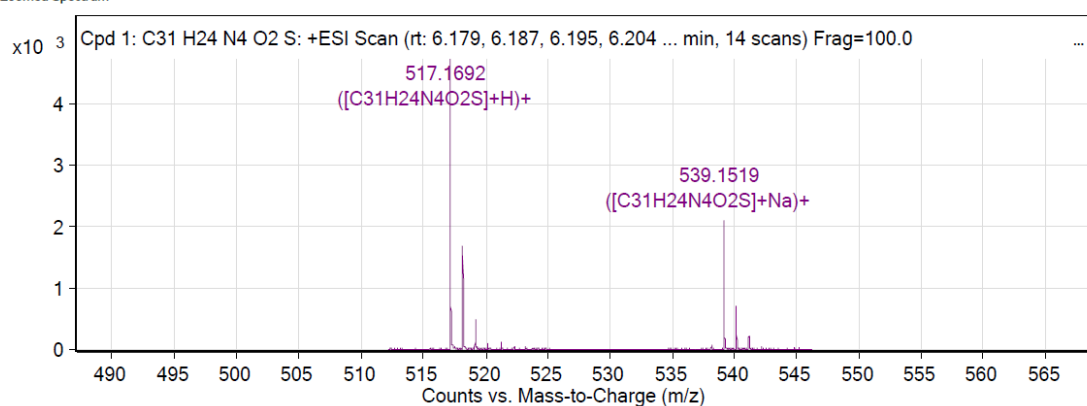

### MS Spectrum Peak List

| m/z      | Calc m/z | Diff(ppm) | z | Abund   | Formula     | Ion     |
|----------|----------|-----------|---|---------|-------------|---------|
| 517.1692 | 517.1693 | 0.18      | 1 | 4806.15 | C31H24N4O2S | (M+H)+  |
| 518.1721 | 518.1723 | 0.37      | 1 | 1741.63 | C31H24N4O2S | (M+H)+  |
| 519.1722 | 519.1712 | -1.67     | 1 | 551.25  | C31H24N4O2S | (M+H)+  |
| 520.1747 | 520.1717 | -5.78     | 1 | 59.42   | C31H24N4O2S | (M+H)+  |
| 539.1519 | 539.1512 | -1.17     | 1 | 2227.44 | C31H24N4O2S | (M+Na)+ |
| 540.1547 | 540.1543 | -0.79     | 1 | 725.25  | C31H24N4O2S | (M+Na)+ |
| 541.1539 | 541.1531 | -1.47     | 1 | 174.48  | C31H24N4O2S | (M+Na)+ |

4.20 Compound 27a

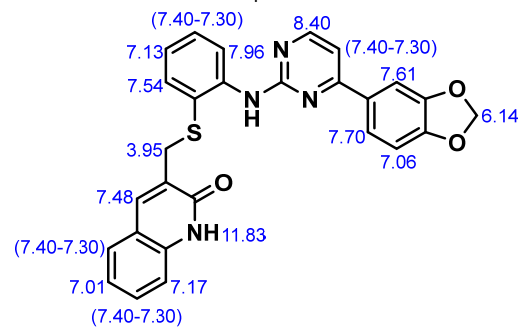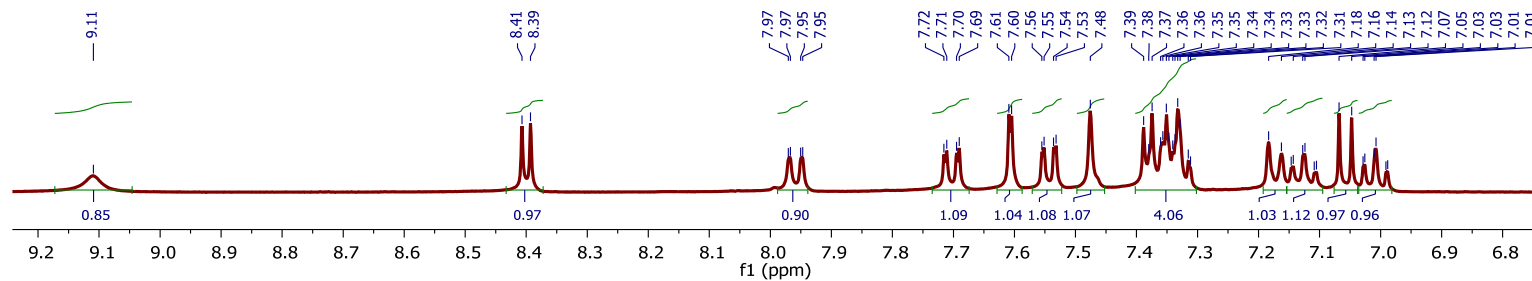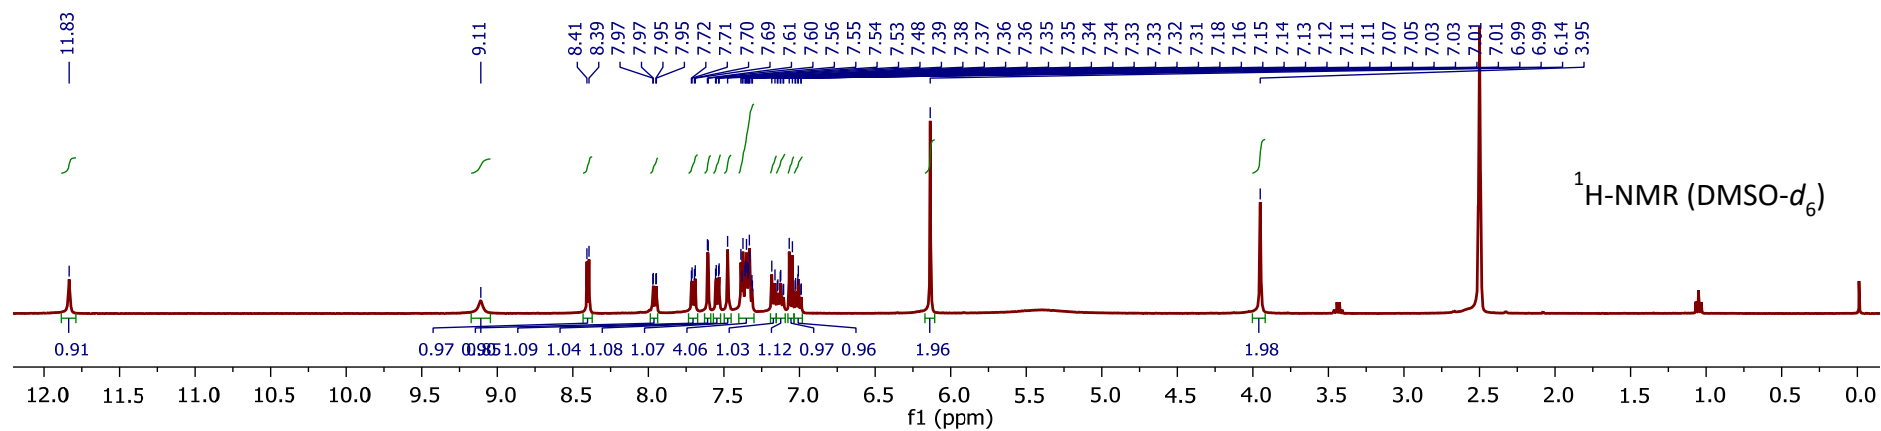

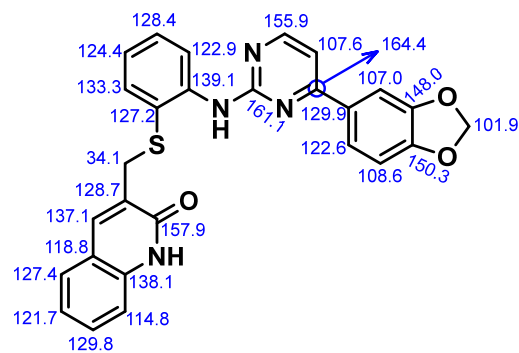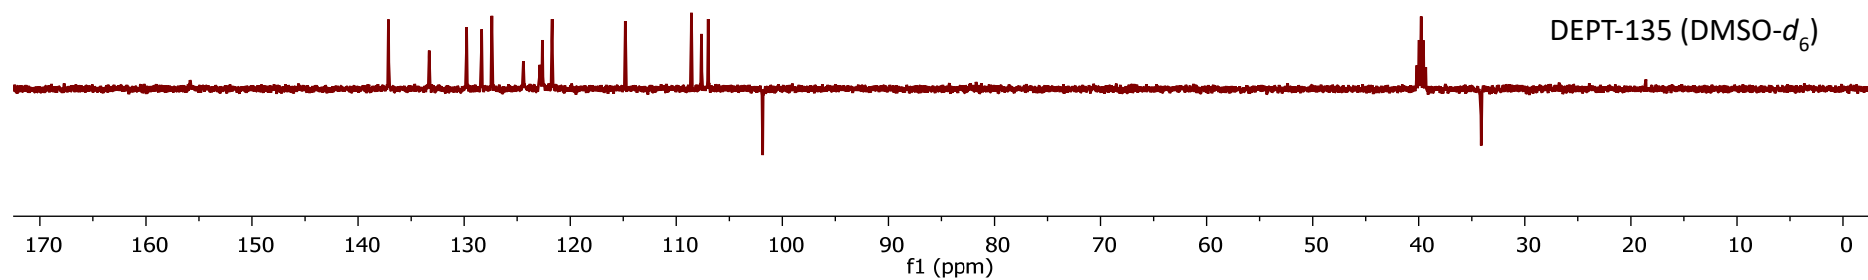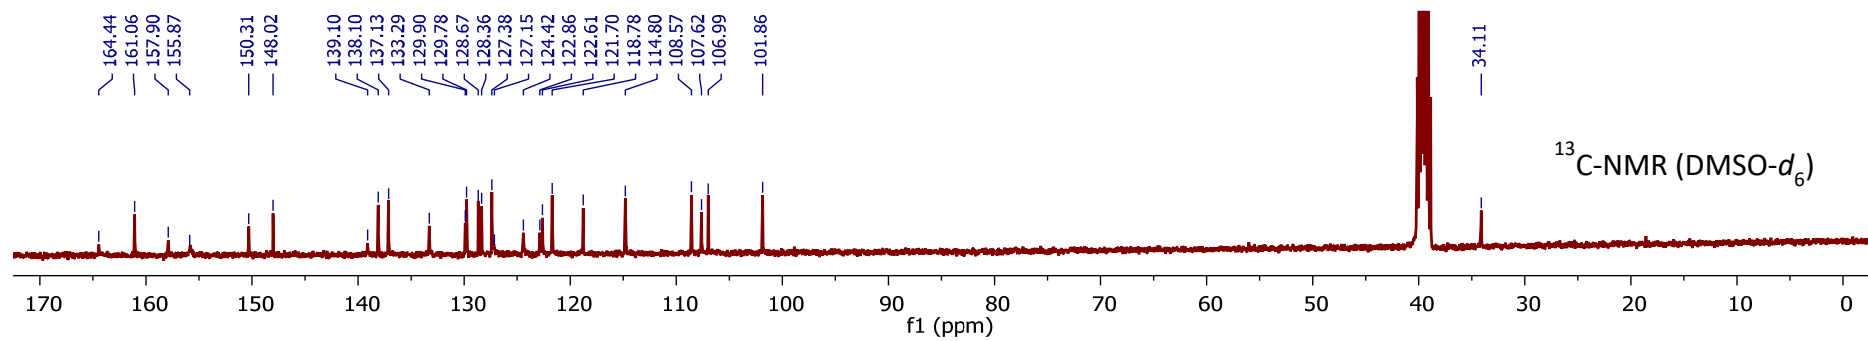

## EI MS (70eV)

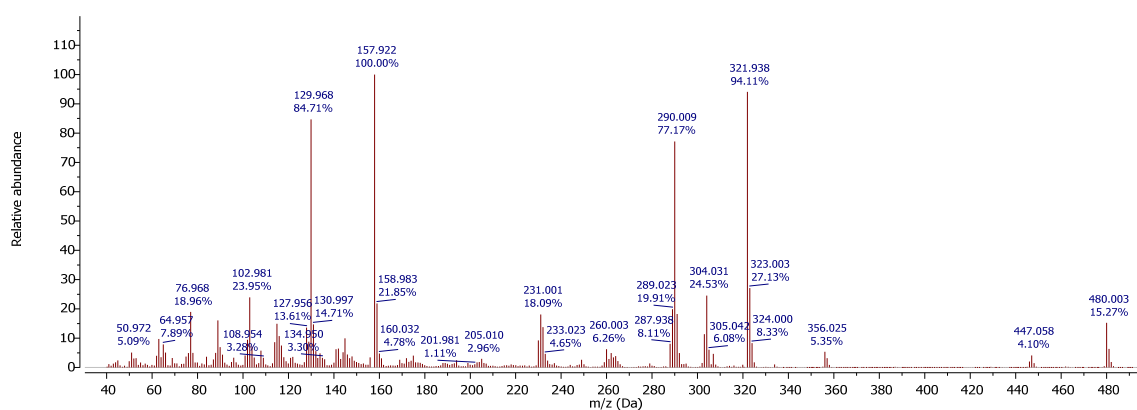

## ESI-QTOF (positive ionization)

MS Zoomed Spectrum

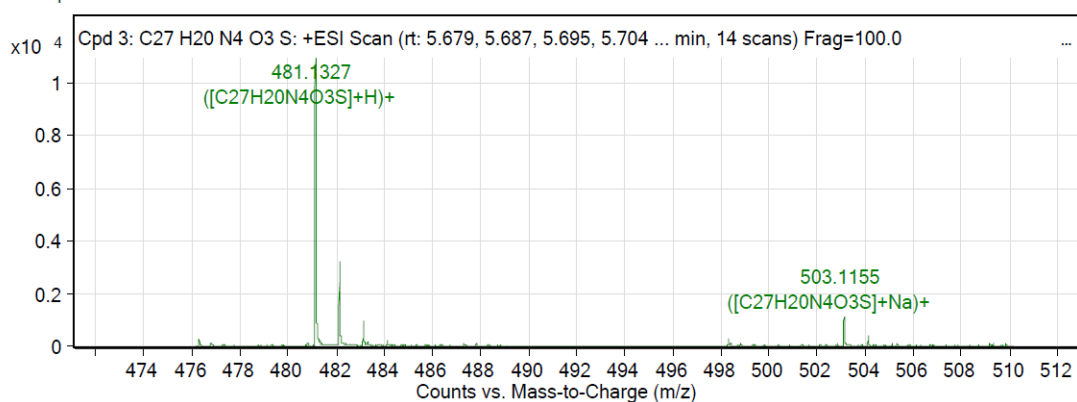

## MS Spectrum Peak List

| m/z      | Calc m/z | Diff(ppm) | z | Abund    | Formula                                                         | Ion                 |
|----------|----------|-----------|---|----------|-----------------------------------------------------------------|---------------------|
| 481.1327 | 481.1329 | 0.32      | 1 | 10997.75 | C <sub>27</sub> H <sub>20</sub> N <sub>4</sub> O <sub>3</sub> S | (M+H) <sup>+</sup>  |
| 482.1356 | 482.1359 | 0.5       | 1 | 3385.77  | C <sub>27</sub> H <sub>20</sub> N <sub>4</sub> O <sub>3</sub> S | (M+H) <sup>+</sup>  |
| 483.1344 | 483.1342 | -0.48     | 1 | 1002.74  | C <sub>27</sub> H <sub>20</sub> N <sub>4</sub> O <sub>3</sub> S | (M+H) <sup>+</sup>  |
| 484.1349 | 484.1349 | 0.03      | 1 | 191.21   | C <sub>27</sub> H <sub>20</sub> N <sub>4</sub> O <sub>3</sub> S | (M+H) <sup>+</sup>  |
| 503.1155 | 503.1148 | -1.41     | 1 | 1172.9   | C <sub>27</sub> H <sub>20</sub> N <sub>4</sub> O <sub>3</sub> S | (M+Na) <sup>+</sup> |
| 504.1165 | 504.1178 | 2.71      | 1 | 371.69   | C <sub>27</sub> H <sub>20</sub> N <sub>4</sub> O <sub>3</sub> S | (M+Na) <sup>+</sup> |
| 505.1164 | 505.1161 | -0.45     | 1 | 64.05    | C <sub>27</sub> H <sub>20</sub> N <sub>4</sub> O <sub>3</sub> S | (M+Na) <sup>+</sup> |

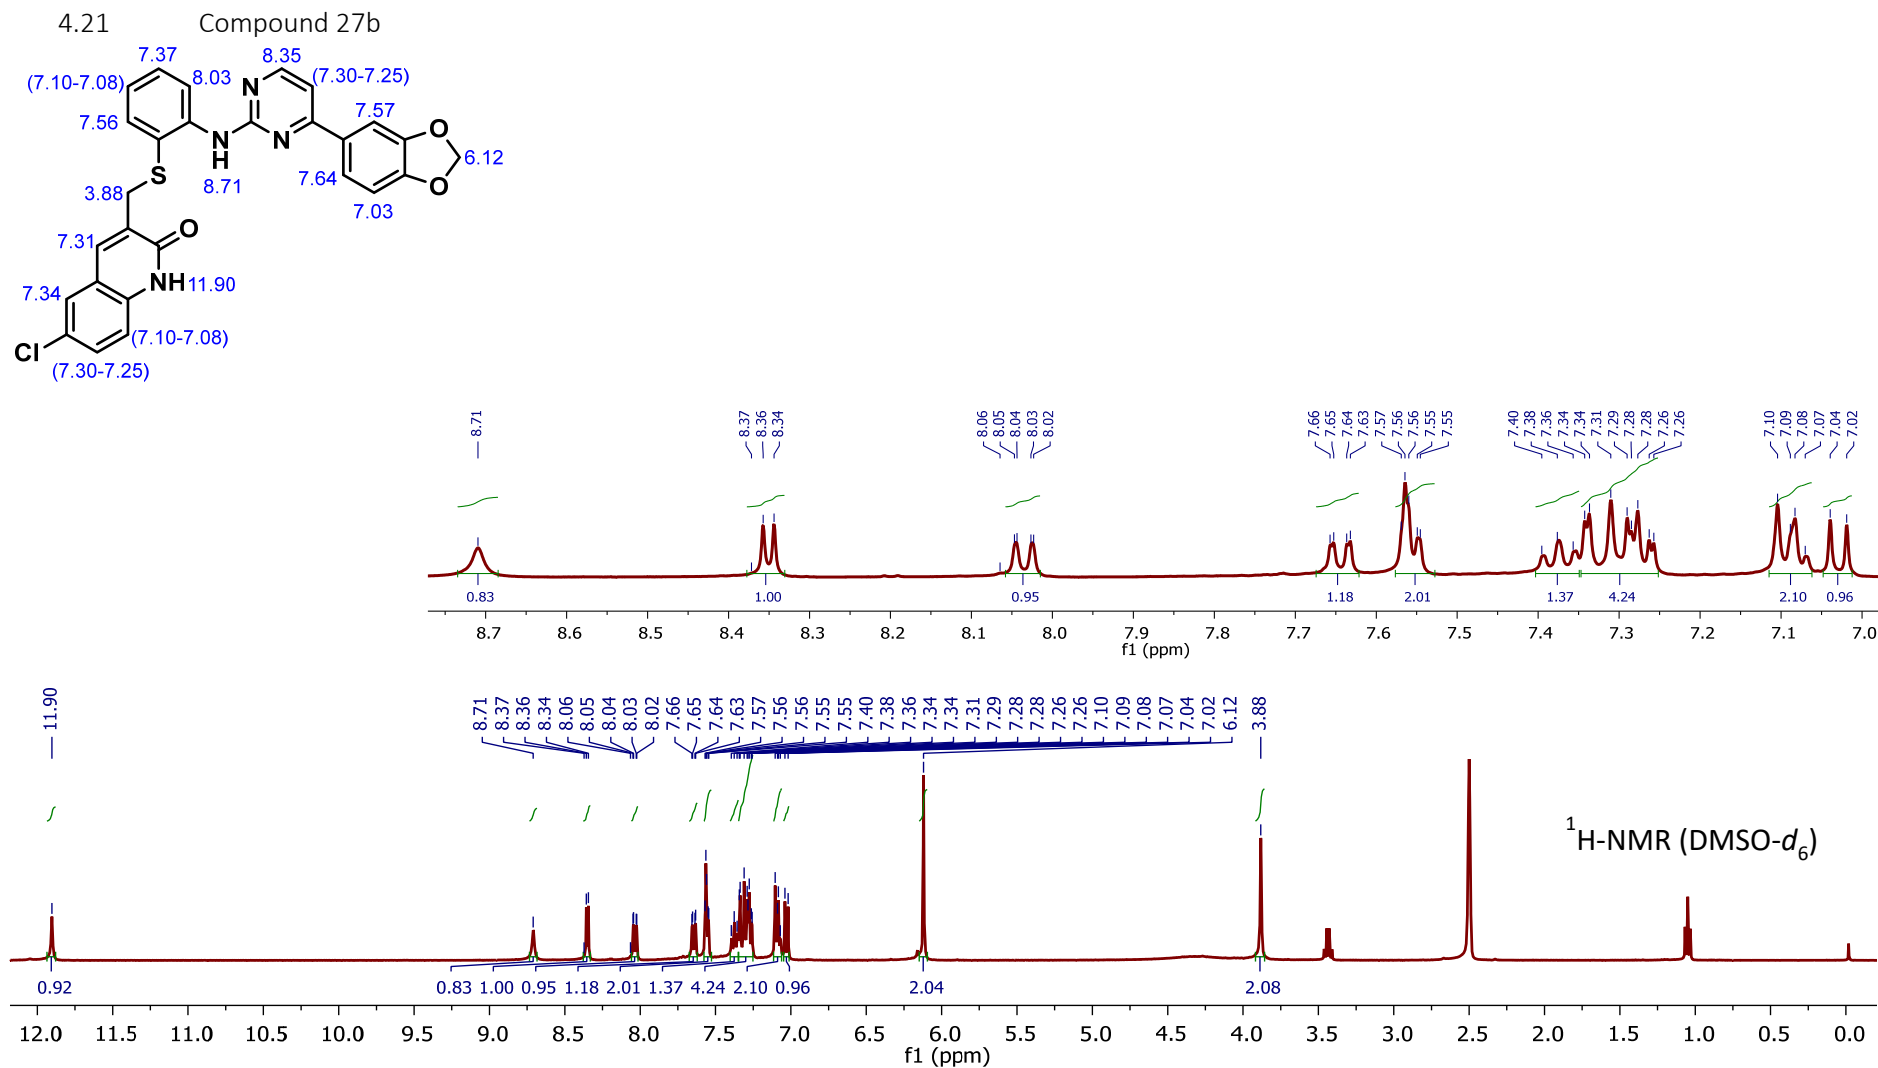

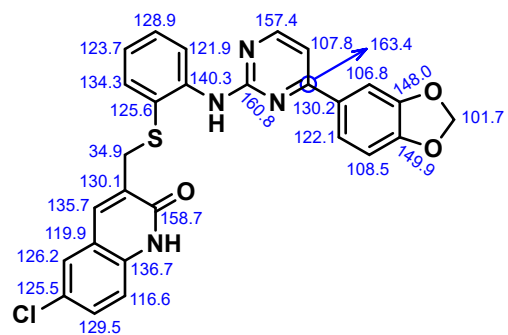

DEPT-135 ( $\text{DMSO}-d_6$ )

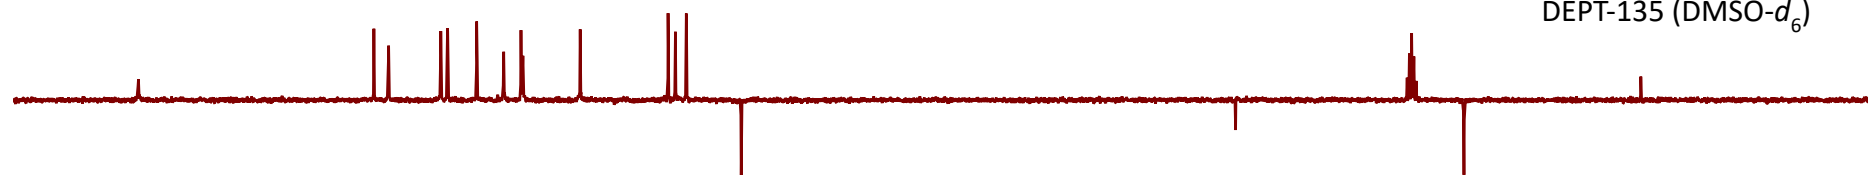

$^{13}\text{C}$ -NMR ( $\text{DMSO}-d_6$ )

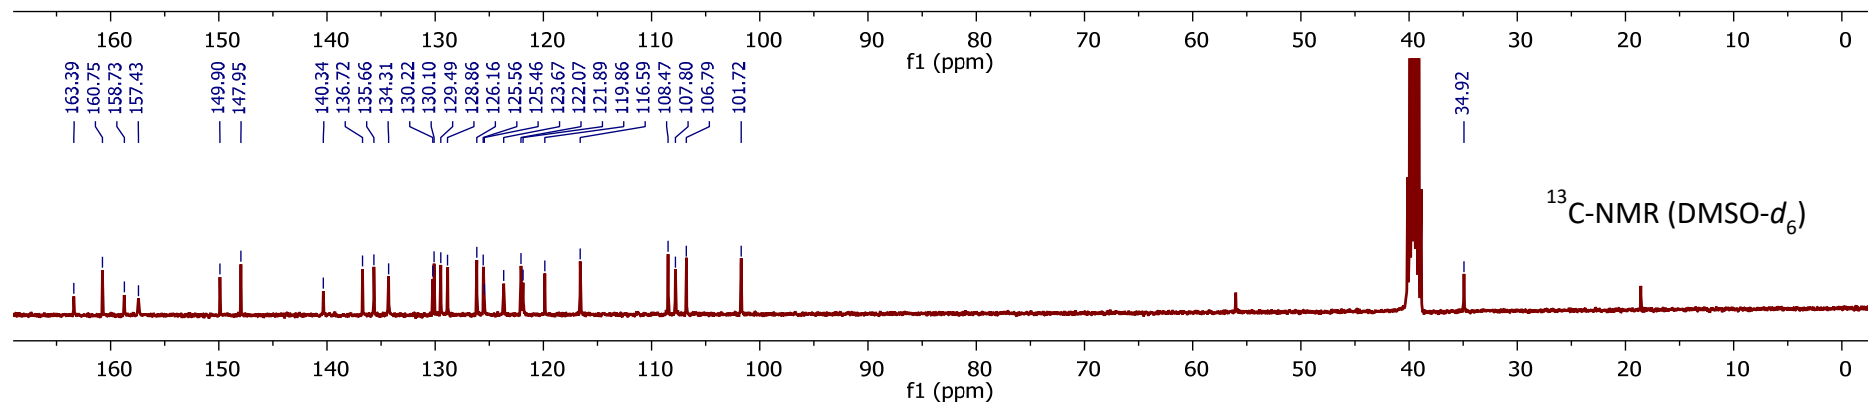

EI MS (70eV)

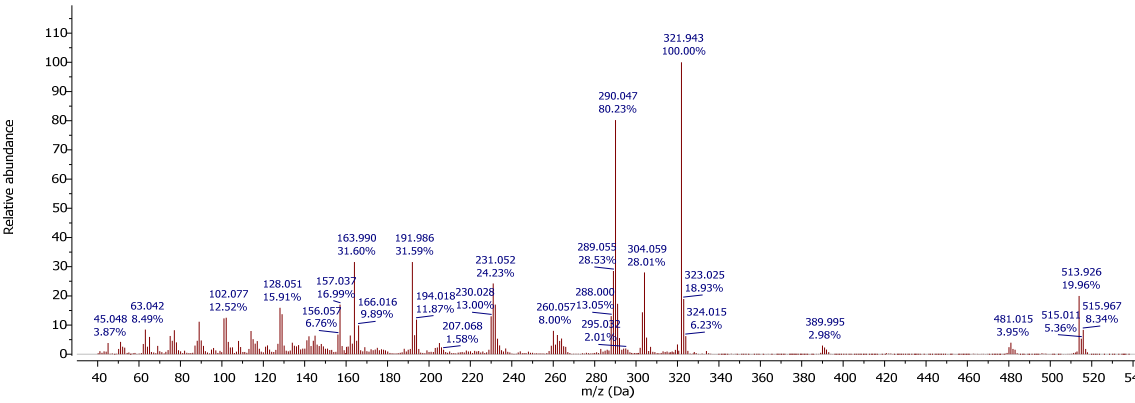

ESI-QTOF (positive ionization)

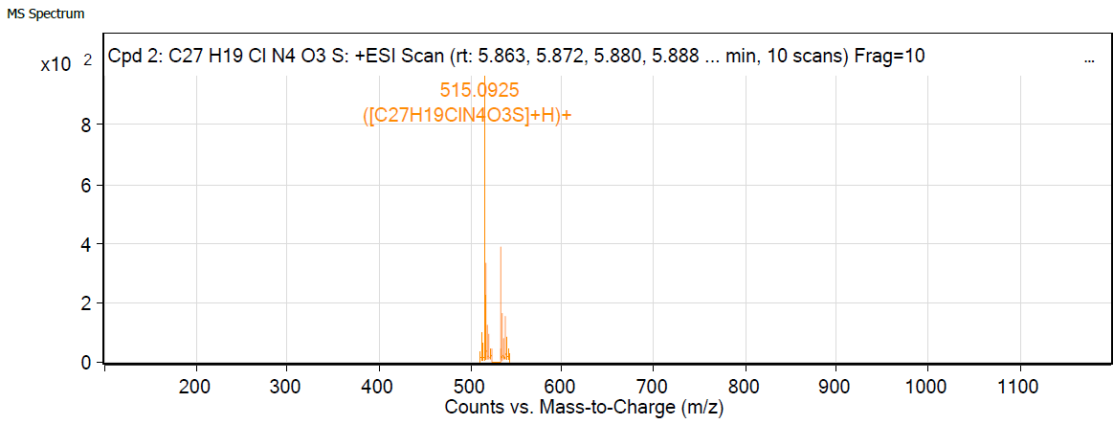

MS Spectrum Peak List

| m/z      | Calc m/z | Diff(ppm) | z | Abund  | Formula                                                           | Ion                |
|----------|----------|-----------|---|--------|-------------------------------------------------------------------|--------------------|
| 515.0925 | 515.0939 | 2.66      | 1 | 991.42 | C <sub>27</sub> H <sub>19</sub> ClN <sub>4</sub> O <sub>3</sub> S | (M+H) <sup>+</sup> |
| 516.0936 | 516.0969 | 6.48      | 1 | 197.51 | C <sub>27</sub> H <sub>19</sub> ClN <sub>4</sub> O <sub>3</sub> S | (M+H) <sup>+</sup> |
| 517.0902 | 517.092  | 3.48      | 1 | 309.58 | C <sub>27</sub> H <sub>19</sub> ClN <sub>4</sub> O <sub>3</sub> S | (M+H) <sup>+</sup> |
| 518.0905 | 518.0943 | 7.26      | 1 | 47.33  | C <sub>27</sub> H <sub>19</sub> ClN <sub>4</sub> O <sub>3</sub> S | (M+H) <sup>+</sup> |
| 519.0911 | 519.0949 | 7.51      | 1 | 0.00   | C <sub>27</sub> H <sub>19</sub> ClN <sub>4</sub> O <sub>3</sub> S | (M+H) <sup>+</sup> |



Chemical structure of compound 10, 2-(2-(4-(benzo[d][1,3]oxazol-2-yl)phenyl)-1H-imidazol-5-yl)benzenethiol, with <sup>13</sup>C NMR peaks labeled: 7.43-7.34, 7.15, 7.95, 8.40, 7.61-7.54, 7.43-7.34, 7.61-7.54, 7.69, 6.13, 7.08-7.06, 9.14, and 3.94.

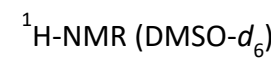

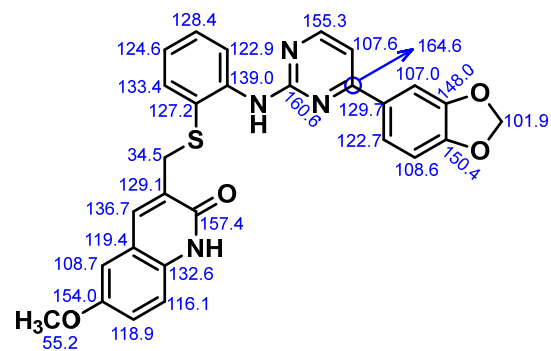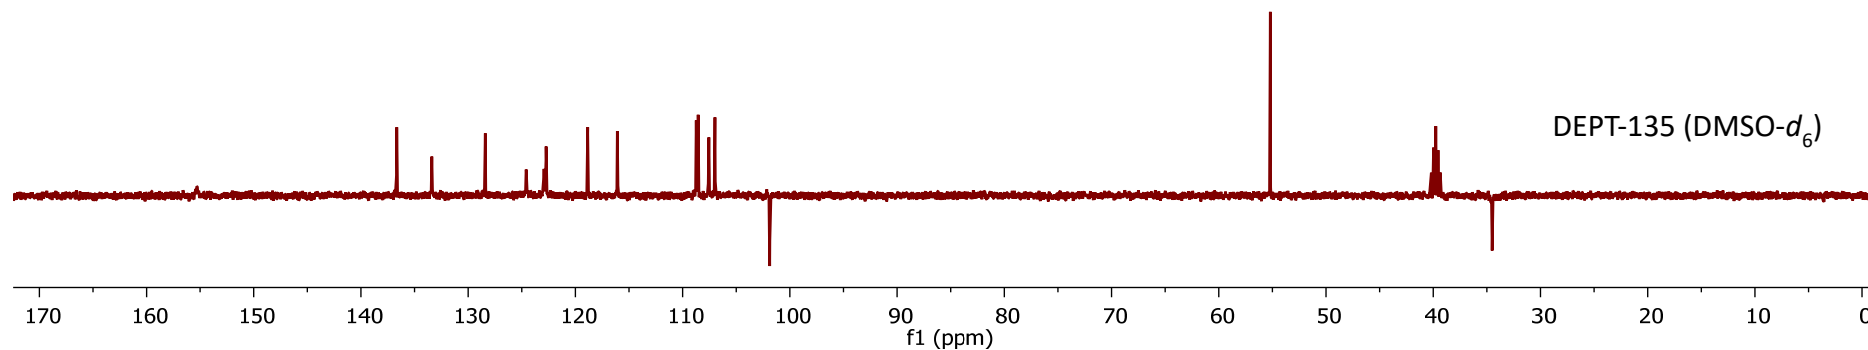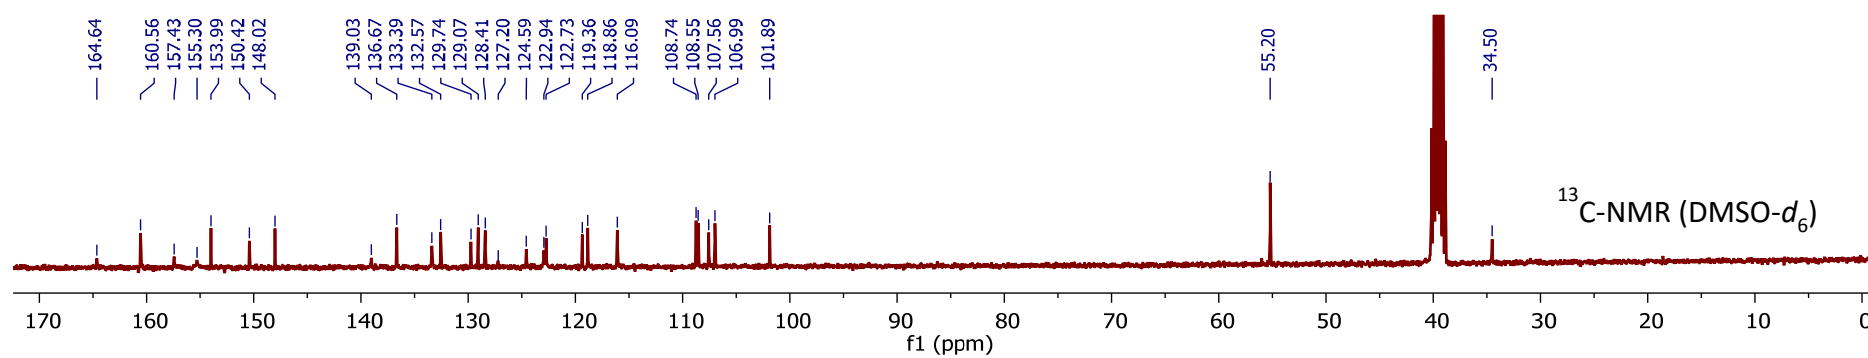

## EI MS (70eV)

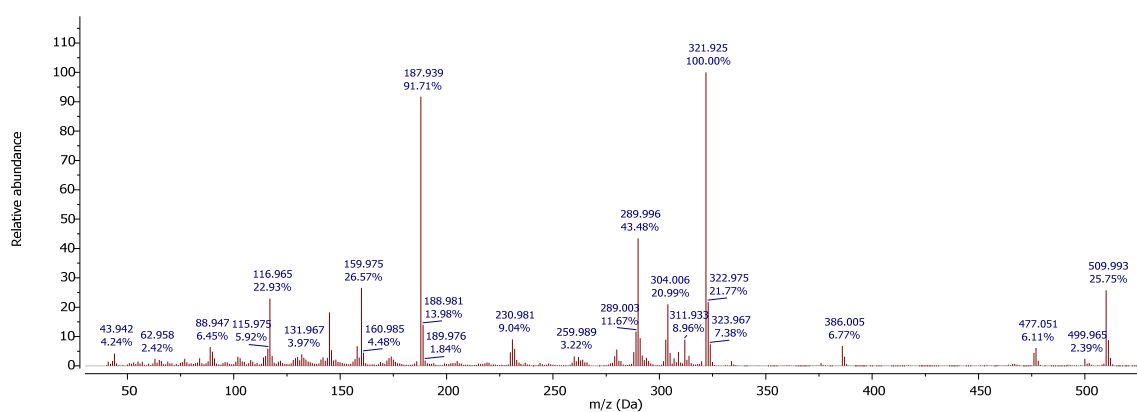

## ESI-QTOF (positive ionization)

MS Spectrum

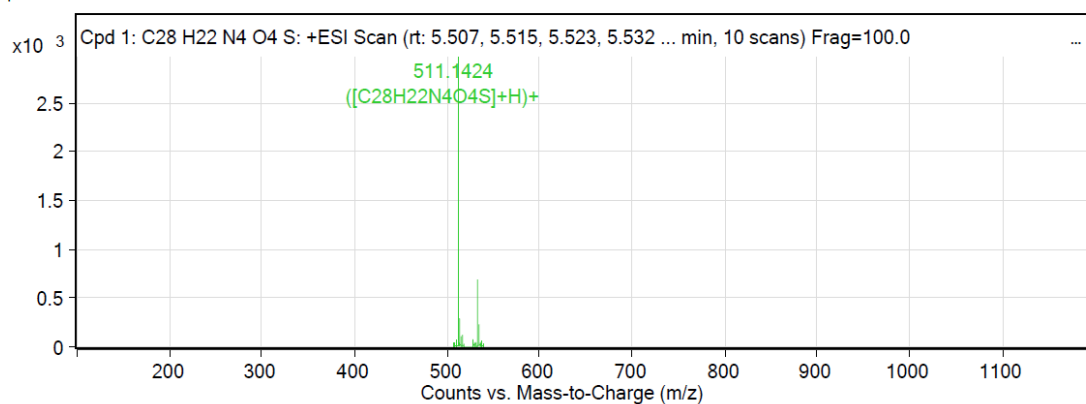

### MS Spectrum Peak List

| m/z      | Calc m/z | Diff(ppm) | z | Abund   | Formula     | Ion     |
|----------|----------|-----------|---|---------|-------------|---------|
| 511.1424 | 511.1435 | 2.08      | 1 | 3015.56 | C28H22N4O4S | (M+H)+  |
| 512.1468 | 512.1465 | -0.68     | 1 | 976.06  | C28H22N4O4S | (M+H)+  |
| 513.1478 | 513.145  | -5.53     | 1 | 260.68  | C28H22N4O4S | (M+H)+  |
| 533.1244 | 533.1254 | -2.63     | 1 | 706.64  | C28H22N4O4S | (M+Na)+ |
| 534.1277 | 534.1284 | -1.32     | 1 | 240.8   | C28H22N4O4S | (M+Na)+ |
| 535.1246 | 535.1269 | -4.35     | 1 | 21.18   | C28H22N4O4S | (M+Na)+ |

4.23 Compound 28a

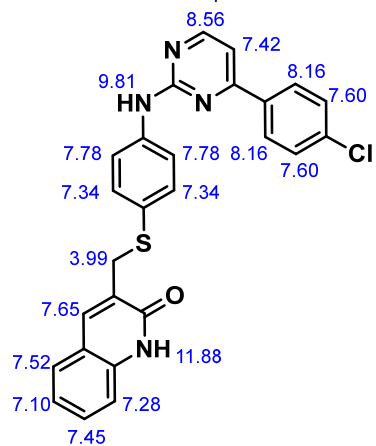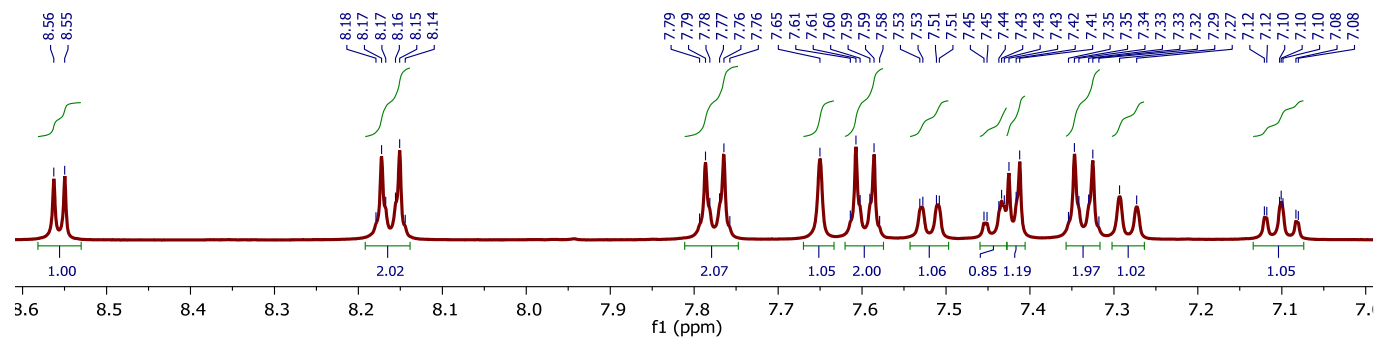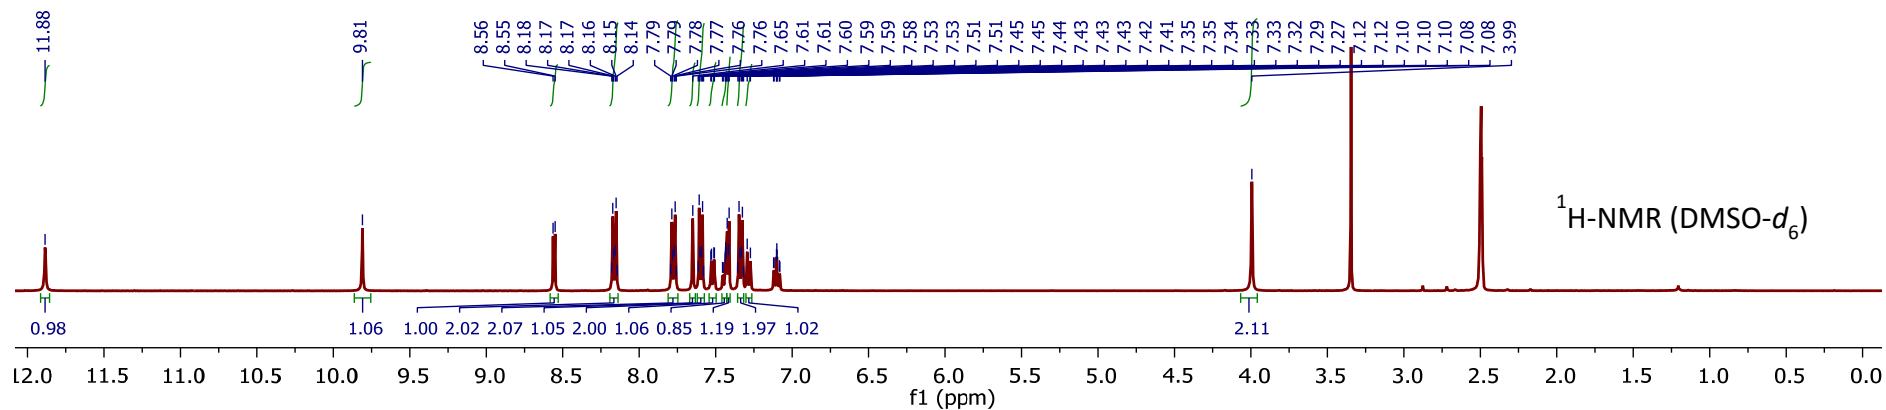

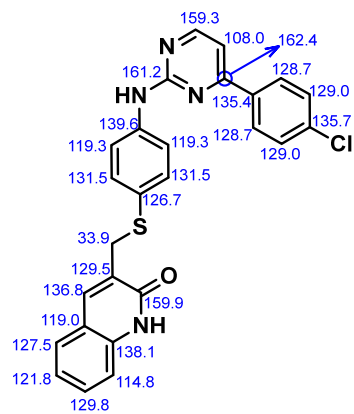

DEPT-135 ( $\text{DMSO}-d_6$ )

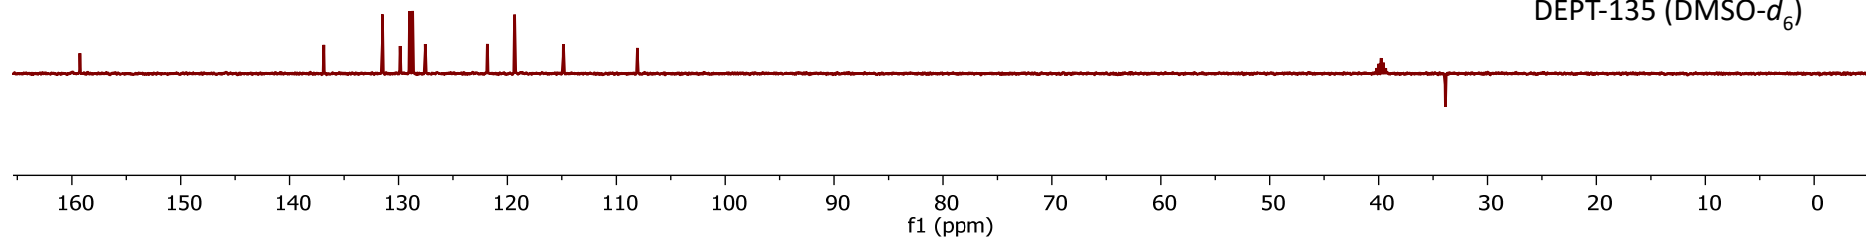

$^{13}\text{C}$ -NMR ( $\text{DMSO}-d_6$ )

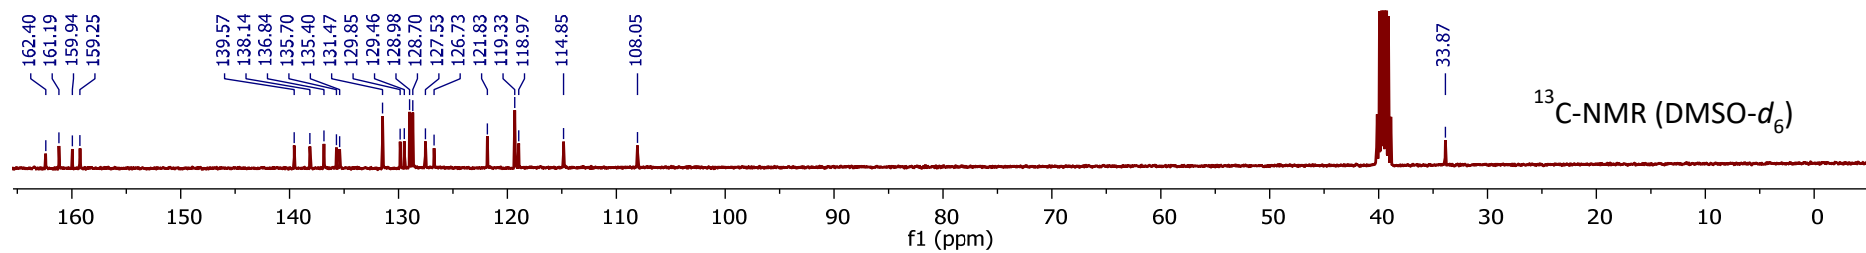

## EI MS (70eV)

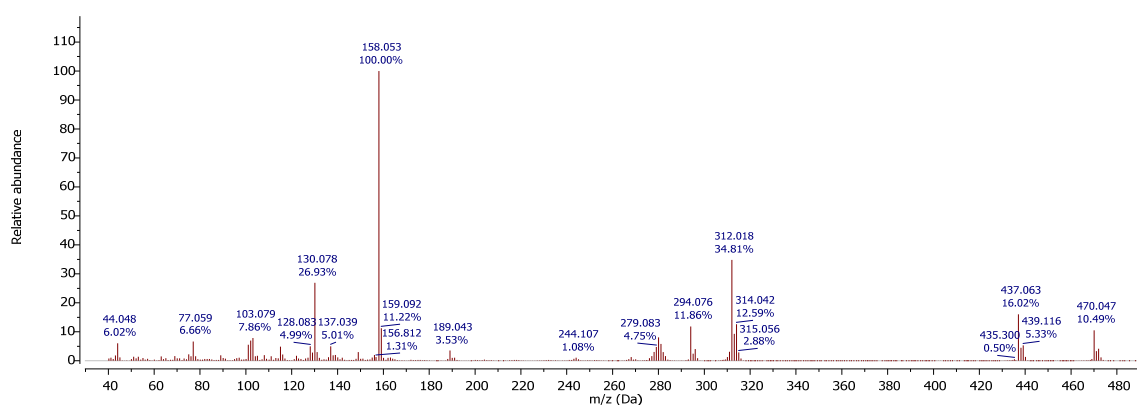

## ESI-QTOF (positive ionization)

MS Zoomed Spectrum

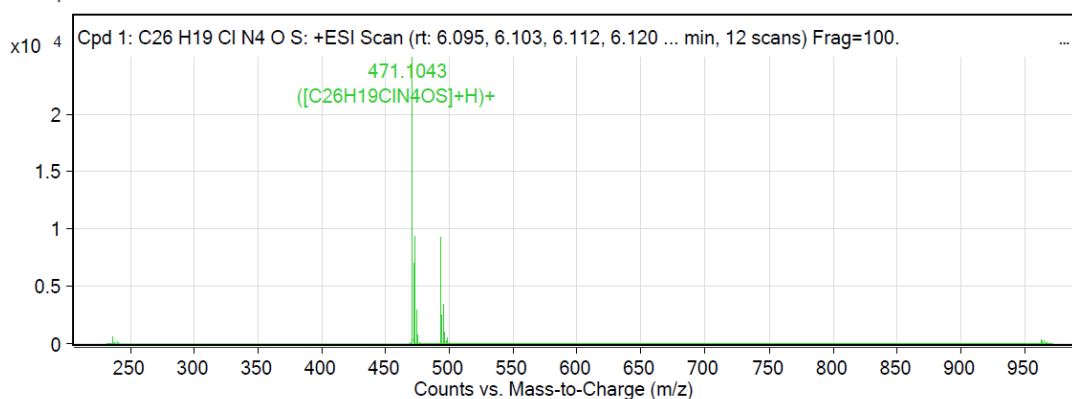

### MS Spectrum Peak List

| m/z      | Calc m/z | Diff(ppm) | z | Abund    | Formula                                             | Ion      |
|----------|----------|-----------|---|----------|-----------------------------------------------------|----------|
| 236.0563 | 236.0557 | -2.45     | 2 | 703.69   | C <sub>26</sub> H <sub>19</sub> ClN <sub>4</sub> OS | (M+2H)+2 |
| 471.1043 | 471.1041 | -0.42     | 1 | 25044.35 | C <sub>26</sub> H <sub>19</sub> ClN <sub>4</sub> OS | (M+H)+   |
| 472.107  | 472.1071 | 0.09      | 1 | 7196.44  | C <sub>26</sub> H <sub>19</sub> ClN <sub>4</sub> OS | (M+H)+   |
| 473.1022 | 473.102  | -0.36     | 1 | 9531.86  | C <sub>26</sub> H <sub>19</sub> ClN <sub>4</sub> OS | (M+H)+   |
| 474.1047 | 474.1043 | -0.84     | 1 | 3006.96  | C <sub>26</sub> H <sub>19</sub> ClN <sub>4</sub> OS | (M+H)+   |
| 493.086  | 493.086  | 0.09      | 1 | 9473.16  | C <sub>26</sub> H <sub>19</sub> ClN <sub>4</sub> OS | (M+Na)+  |
| 494.0895 | 494.089  | -0.97     | 1 | 2629.7   | C <sub>26</sub> H <sub>19</sub> ClN <sub>4</sub> OS | (M+Na)+  |
| 495.0836 | 495.084  | 0.67      | 1 | 3647.4   | C <sub>26</sub> H <sub>19</sub> ClN <sub>4</sub> OS | (M+Na)+  |
| 496.0859 | 496.0863 | 0.7       | 1 | 1086.21  | C <sub>26</sub> H <sub>19</sub> ClN <sub>4</sub> OS | (M+Na)+  |
| 963.1817 | 963.1828 | 1.18      | 1 | 354.06   | C <sub>26</sub> H <sub>19</sub> ClN <sub>4</sub> OS | (2M+Na)+ |

4.24 Compound 28b

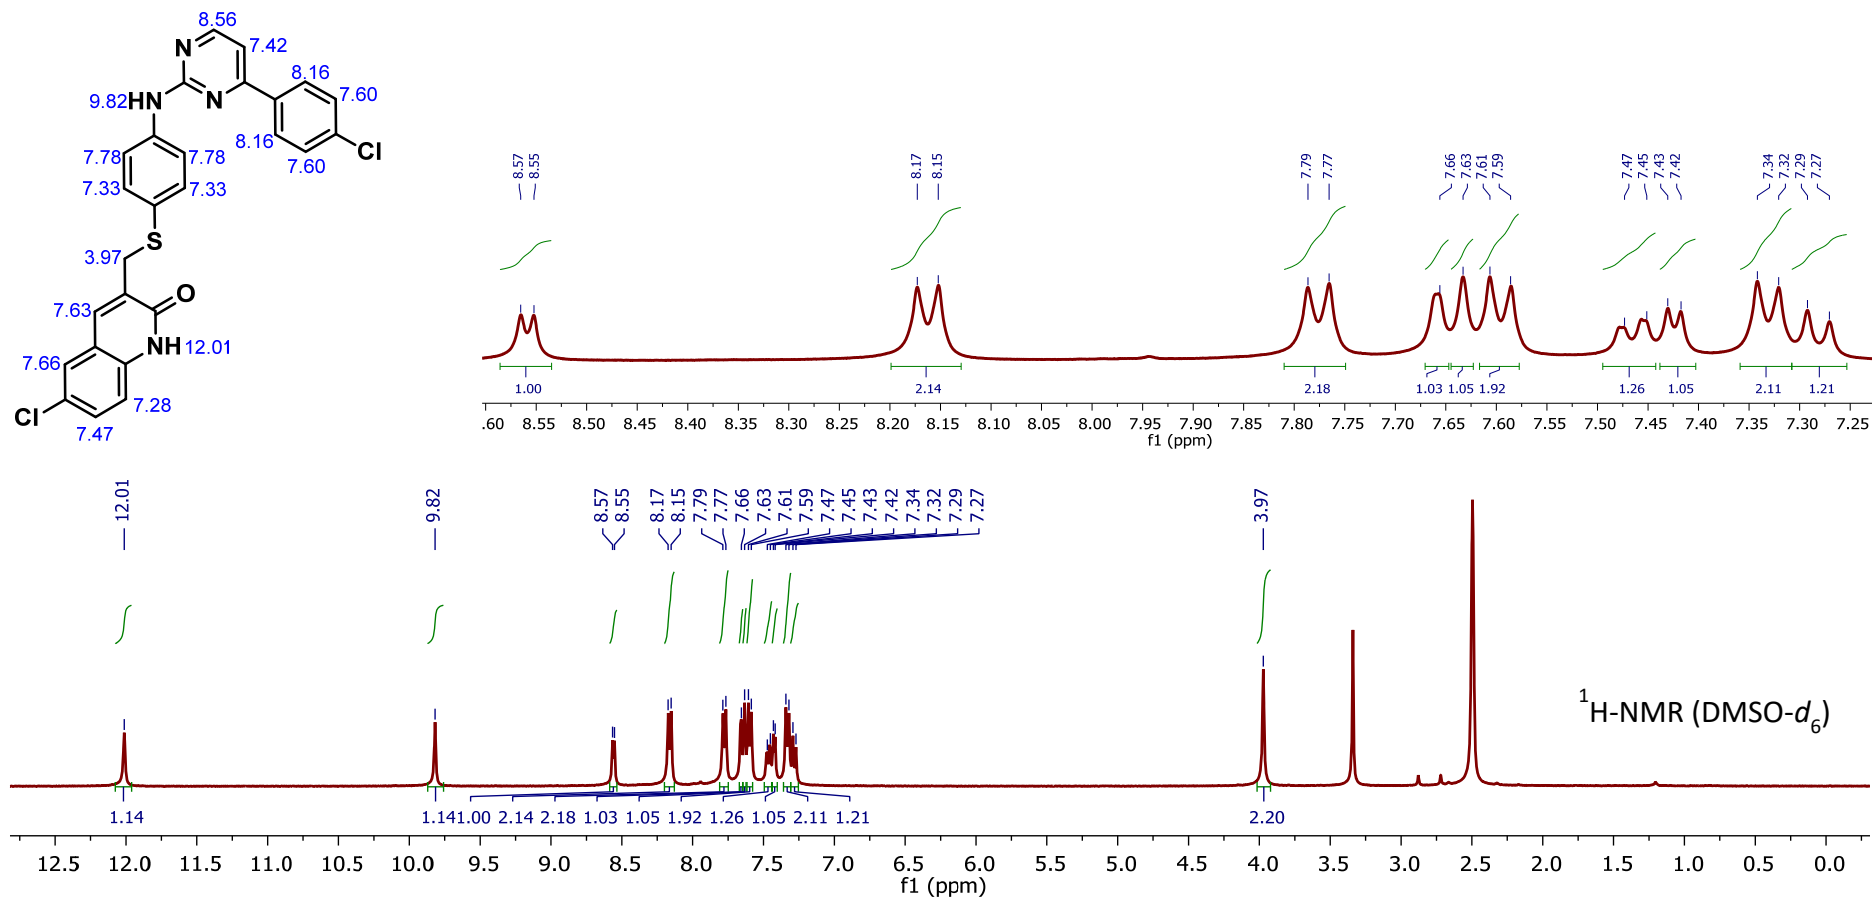

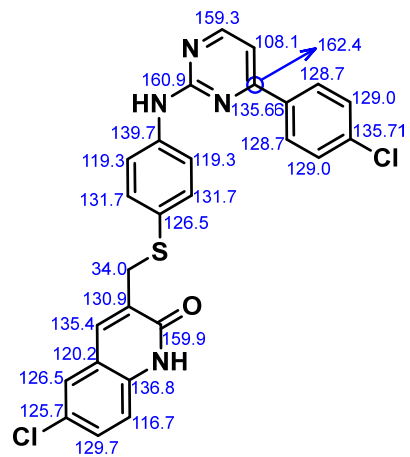

DEPT-135 (DMSO- $d_6$ )

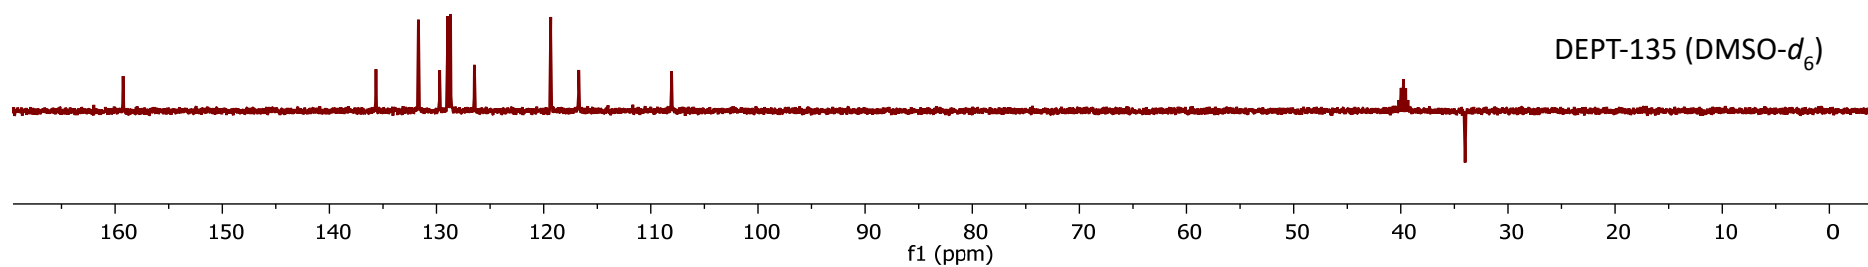

$^{13}\text{C}$ -NMR (DMSO- $d_6$ )

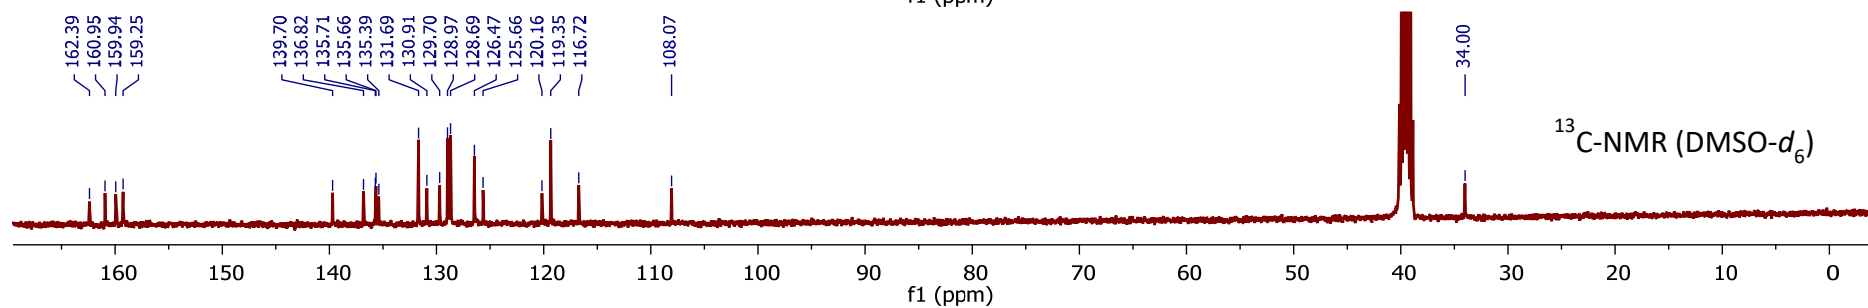



## EI MS (70eV)

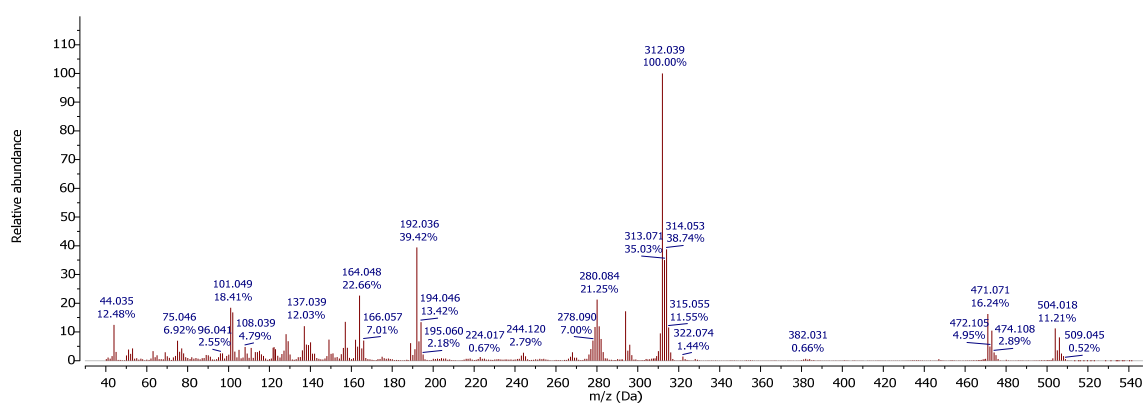

## ESI-QTOF (positive ionization)

MS Zoomed Spectrum

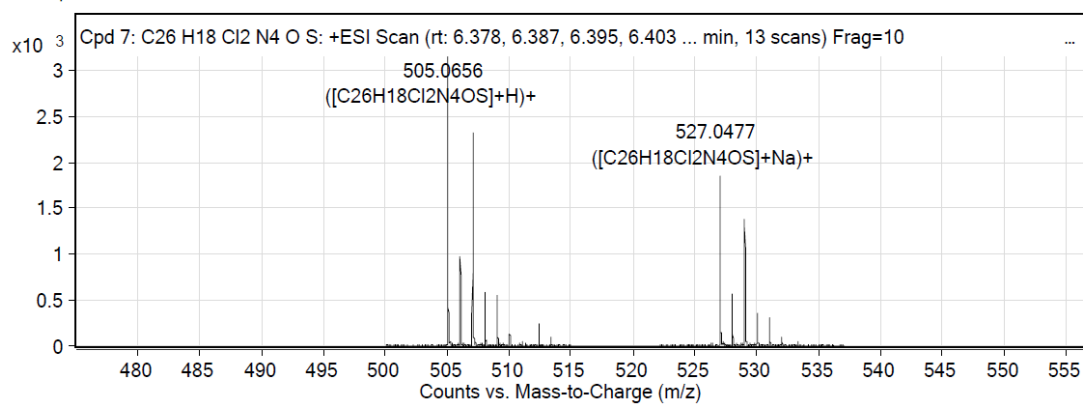

### MS Spectrum Peak List

| m/z      | Calc m/z | Diff(ppm) | z | Abund   | Formula       | Ion     |
|----------|----------|-----------|---|---------|---------------|---------|
| 505.0656 | 505.0651 | -0.89     | 1 | 3256.15 | C26H18Cl2N4OS | (M+H)+  |
| 506.0683 | 506.0681 | -0.35     | 1 | 1040.6  | C26H18Cl2N4OS | (M+H)+  |
| 507.0631 | 507.0627 | -0.92     | 1 | 2374.85 | C26H18Cl2N4OS | (M+H)+  |
| 508.0668 | 508.0653 | -3        | 1 | 635.36  | C26H18Cl2N4OS | (M+H)+  |
| 509.0606 | 509.0608 | 0.34      | 1 | 581.17  | C26H18Cl2N4OS | (M+H)+  |
| 527.0477 | 527.0471 | -1.2      | 1 | 1915.42 | C26H18Cl2N4OS | (M+Na)+ |
| 528.0503 | 528.05   | -0.5      | 1 | 572.96  | C26H18Cl2N4OS | (M+Na)+ |
| 529.0442 | 529.0446 | 0.76      | 1 | 1465.6  | C26H18Cl2N4OS | (M+Na)+ |
| 530.0473 | 530.0472 | -0.16     | 1 | 357.7   | C26H18Cl2N4OS | (M+Na)+ |
| 531.0453 | 531.0427 | -4.88     | 1 | 308.78  | C26H18Cl2N4OS | (M+Na)+ |

4.25 Compound 28c

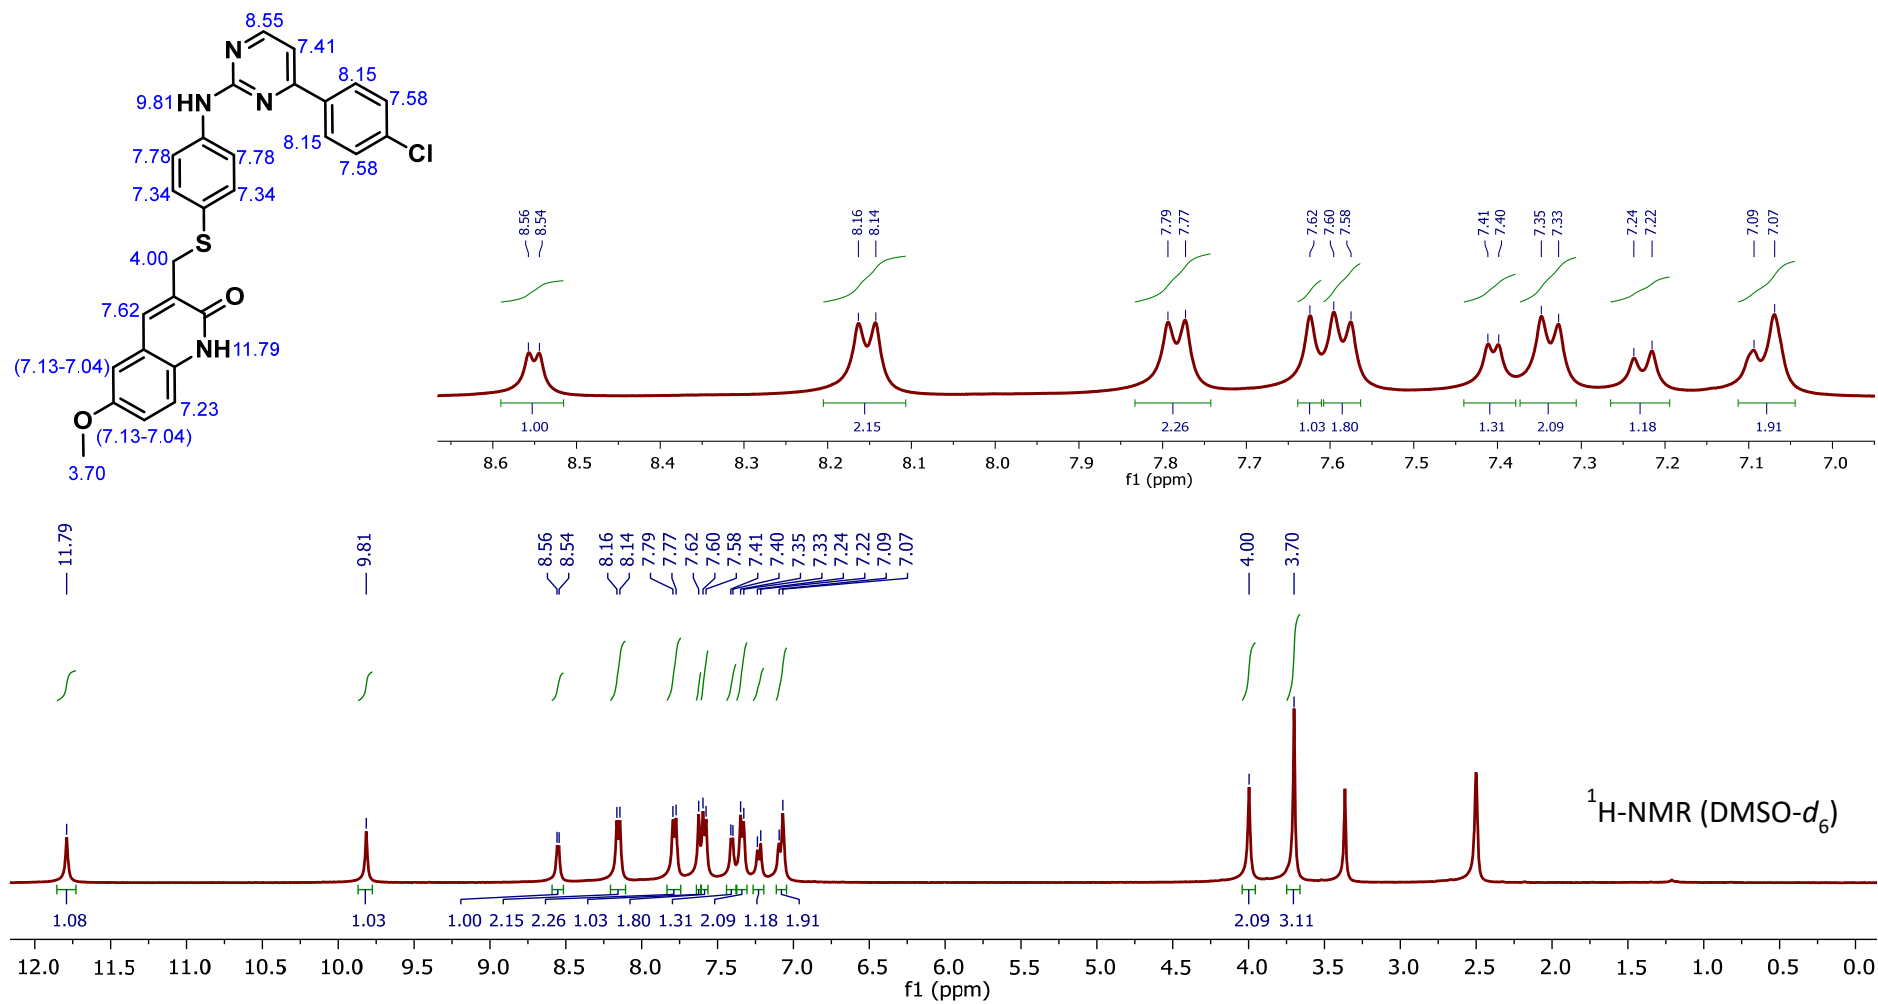

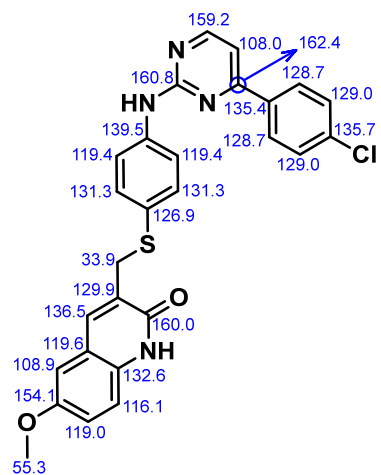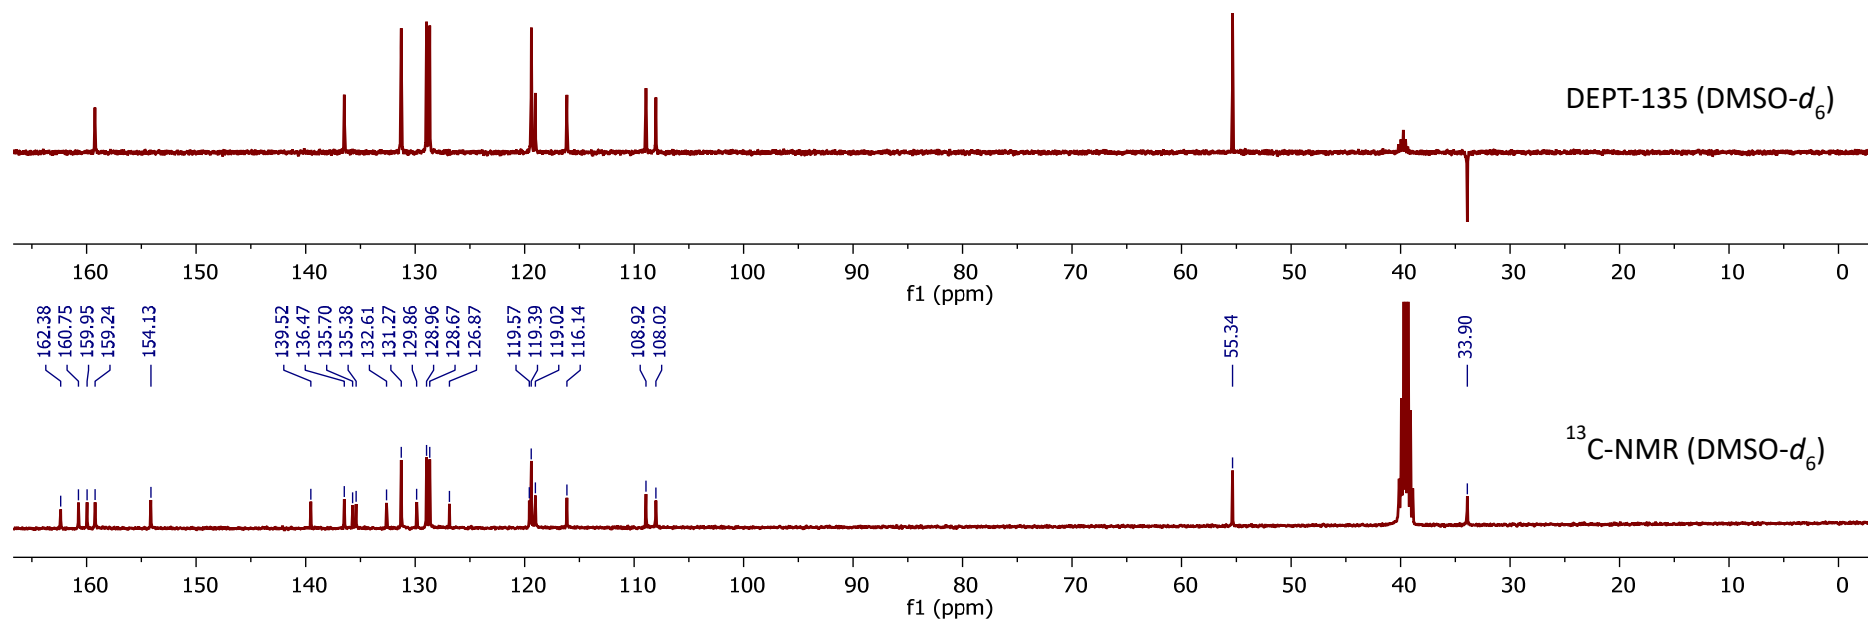

EI MS (70eV)

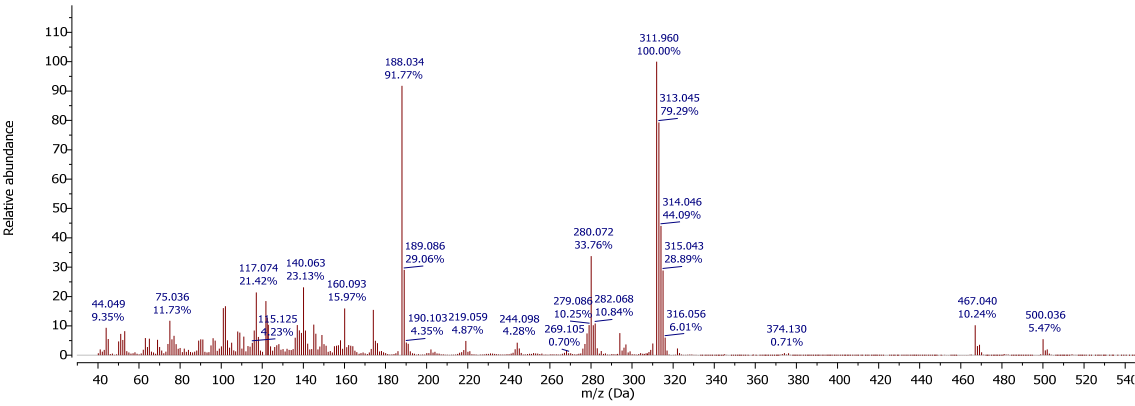

ESI-QTOF (positive ionization)

MS Zoomed Spectrum

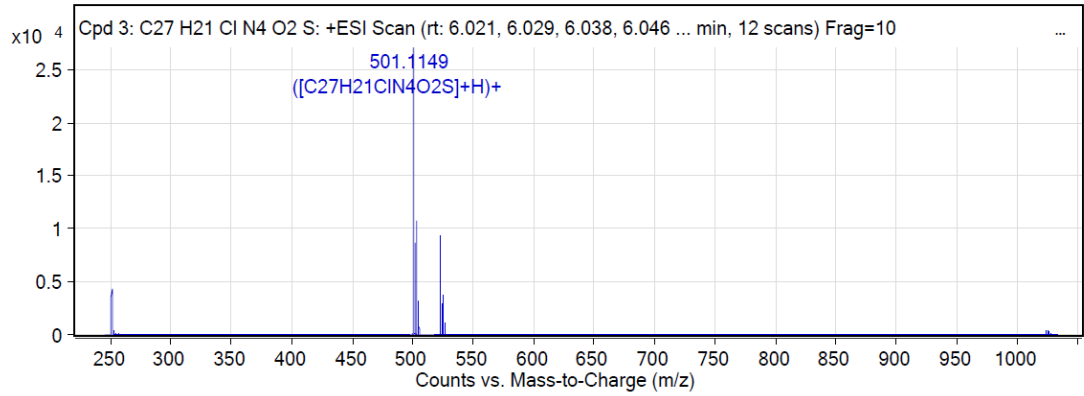

MS Spectrum Peak List

| m/z       | Calc m/z | Diff(ppm) | z | Abund    | Formula       | Ion      |
|-----------|----------|-----------|---|----------|---------------|----------|
| 251.0607  | 251.061  | 0.87      | 2 | 4426.26  | C27H21ClN4O2S | (M+2H)+2 |
| 252.0598  | 252.06   | 0.68      | 2 | 1891.7   | C27H21ClN4O2S | (M+2H)+2 |
| 501.1149  | 501.1147 | -0.58     | 1 | 27915.04 | C27H21ClN4O2S | (M+H)+   |
| 502.1182  | 502.1176 | -1.03     | 1 | 8698.28  | C27H21ClN4O2S | (M+H)+   |
| 503.113   | 503.1127 | -0.71     | 1 | 10863.01 | C27H21ClN4O2S | (M+H)+   |
| 504.1153  | 504.115  | -0.68     | 1 | 3341.83  | C27H21ClN4O2S | (M+H)+   |
| 523.0968  | 523.0966 | -0.44     | 1 | 9575.11  | C27H21ClN4O2S | (M+Na)+  |
| 524.0994  | 524.0996 | 0.33      | 1 | 3051.01  | C27H21ClN4O2S | (M+Na)+  |
| 525.0949  | 525.0946 | -0.46     | 1 | 3856.37  | C27H21ClN4O2S | (M+Na)+  |
| 1023.2084 | 1023.204 | -4.34     | 1 | 341.57   | C27H21ClN4O2S | (2M+Na)+ |

4.26 Compound 29a

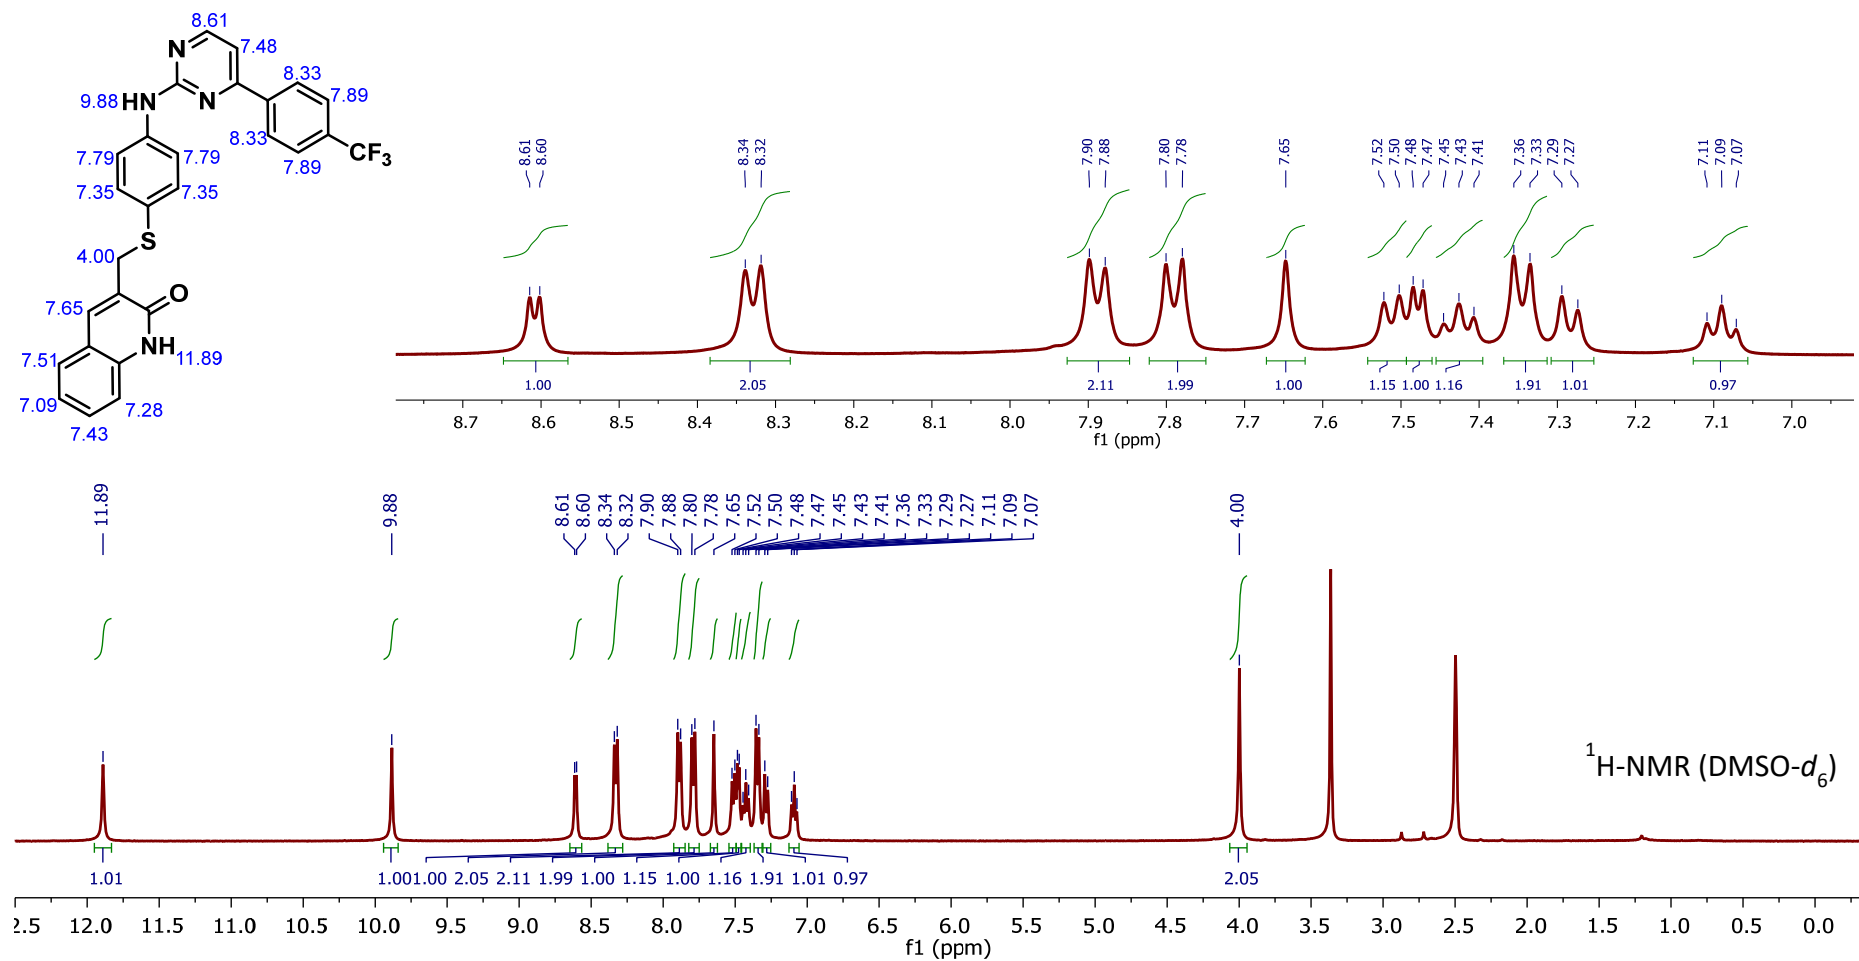

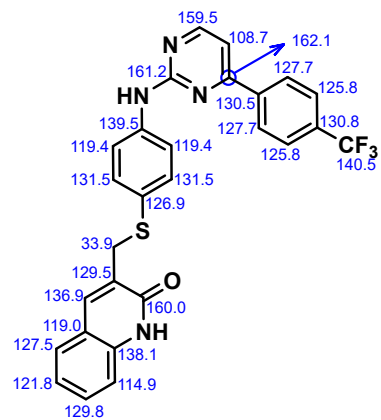

DEPT-135 (DMSO- $d_6$ )

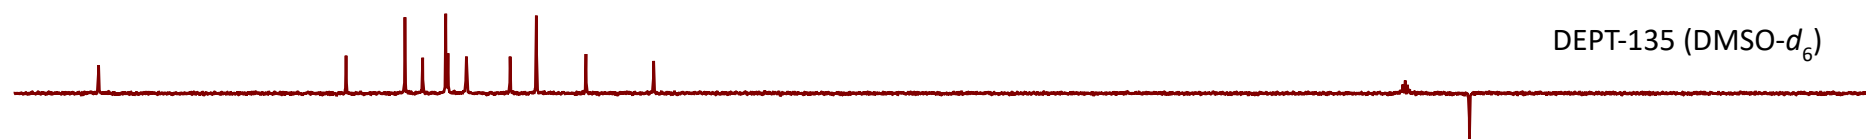

$^{13}\text{C}$ -NMR (DMSO- $d_6$ )

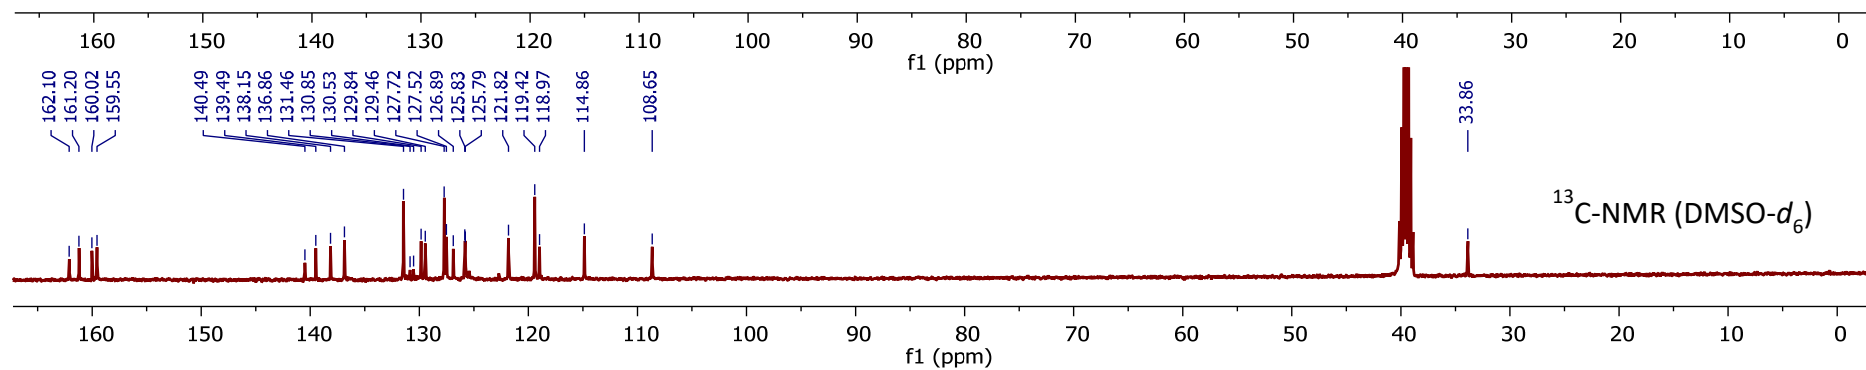

## EI MS (70eV)

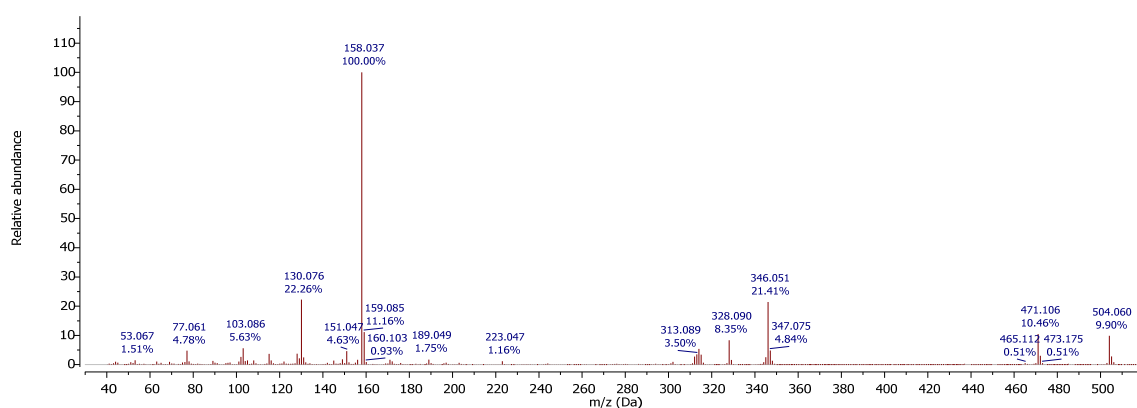

## ESI-QTOF (positive ionization)

MS Zoomed Spectrum

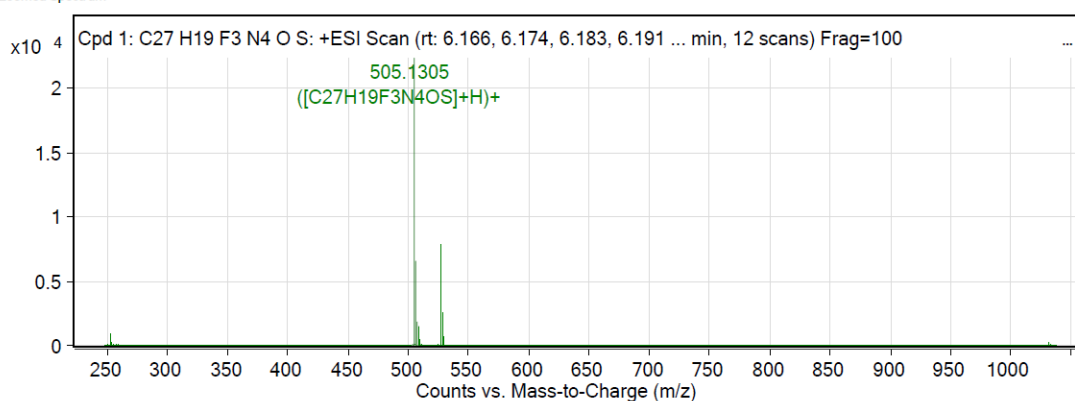

### MS Spectrum Peak List

| m/z       | Calc m/z  | Diff(ppm) | z | Abund    | Formula                                                           | Ion      |
|-----------|-----------|-----------|---|----------|-------------------------------------------------------------------|----------|
| 253.0686  | 253.0689  | 0.93      | 2 | 999.09   | C <sub>27</sub> H <sub>19</sub> F <sub>3</sub> N <sub>4</sub> O S | (M+2H)+2 |
| 253.5731  | 253.5704  | -10.91    | 2 | 251.84   | C <sub>27</sub> H <sub>19</sub> F <sub>3</sub> N <sub>4</sub> O S | (M+2H)+2 |
| 505.1305  | 505.1304  | -0.15     | 1 | 22389.96 | C <sub>27</sub> H <sub>19</sub> F <sub>3</sub> N <sub>4</sub> O S | (M+H)+   |
| 506.1334  | 506.1334  | 0.06      | 1 | 6679.36  | C <sub>27</sub> H <sub>19</sub> F <sub>3</sub> N <sub>4</sub> O S | (M+H)+   |
| 507.132   | 507.1316  | -0.69     | 1 | 1904.2   | C <sub>27</sub> H <sub>19</sub> F <sub>3</sub> N <sub>4</sub> O S | (M+H)+   |
| 508.1332  | 508.1321  | -2.15     | 1 | 355.41   | C <sub>27</sub> H <sub>19</sub> F <sub>3</sub> N <sub>4</sub> O S | (M+H)+   |
| 527.1125  | 527.1124  | -0.2      | 1 | 7999.77  | C <sub>27</sub> H <sub>19</sub> F <sub>3</sub> N <sub>4</sub> O S | (M+Na)+  |
| 528.1149  | 528.1154  | 0.85      | 1 | 2662.99  | C <sub>27</sub> H <sub>19</sub> F <sub>3</sub> N <sub>4</sub> O S | (M+Na)+  |
| 529.113   | 529.1135  | 0.99      | 1 | 829.77   | C <sub>27</sub> H <sub>19</sub> F <sub>3</sub> N <sub>4</sub> O S | (M+Na)+  |
| 1031.2355 | 1031.2356 | 0.09      | 1 | 264.18   | C <sub>27</sub> H <sub>19</sub> F <sub>3</sub> N <sub>4</sub> O S | (2M+Na)+ |

4.27 Compound 29b

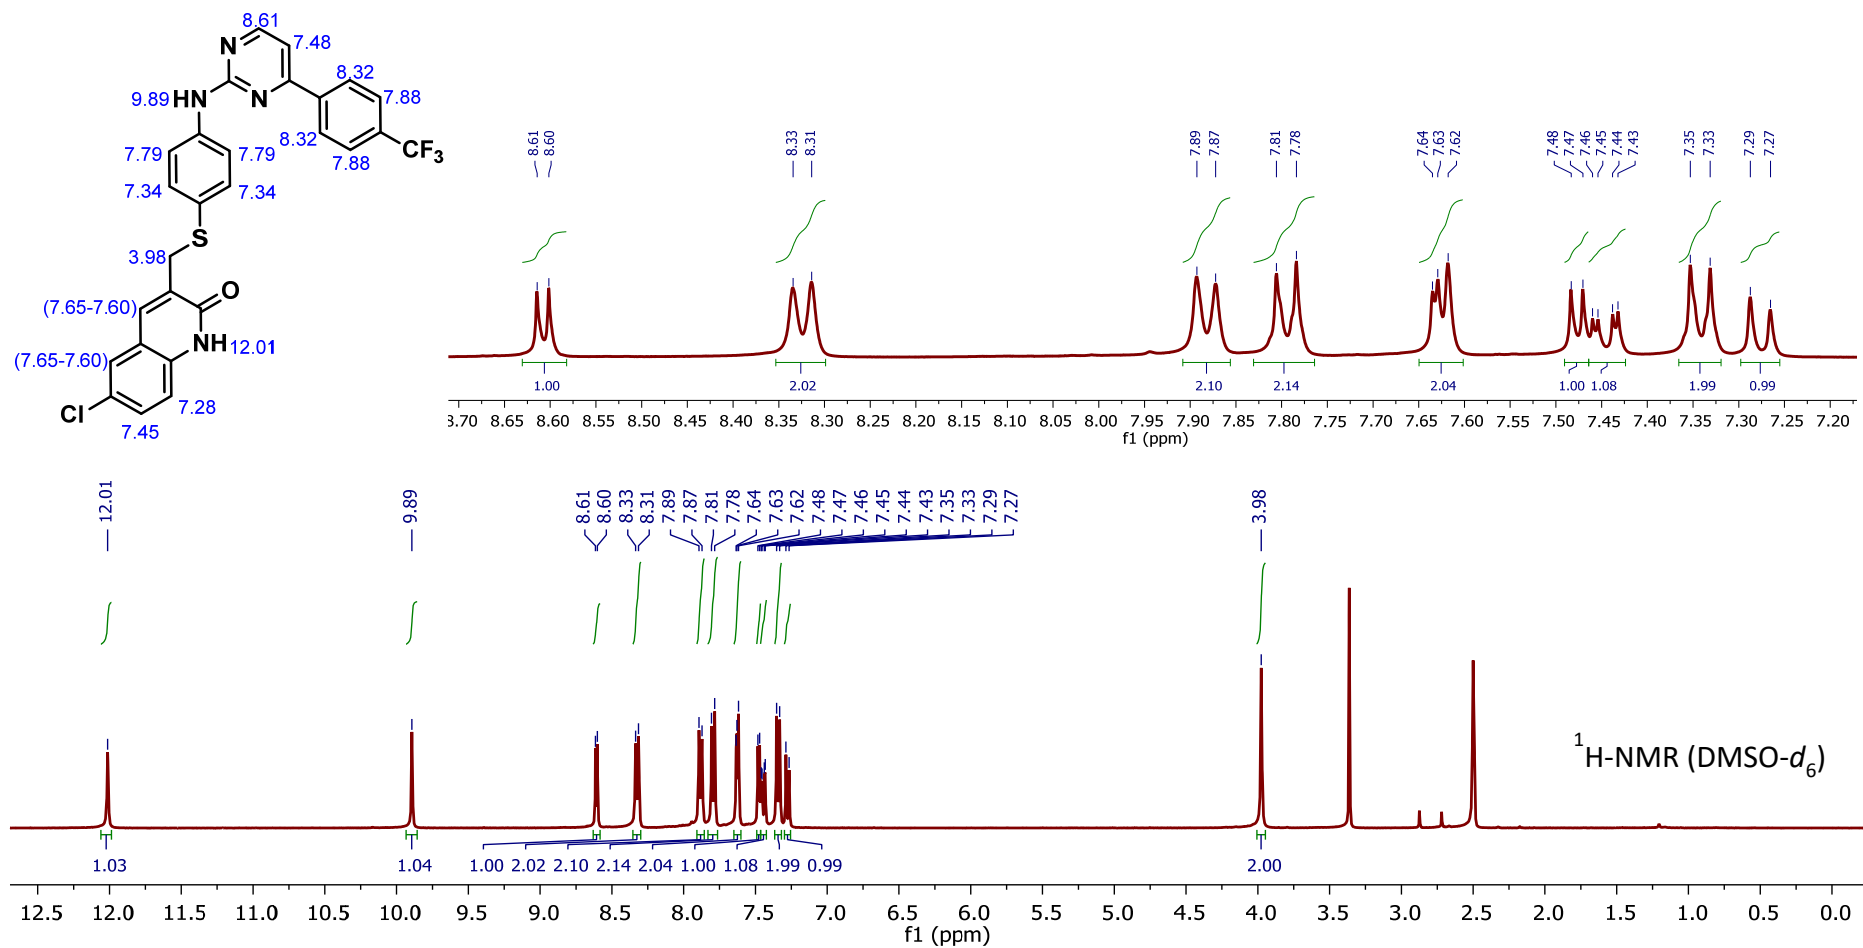



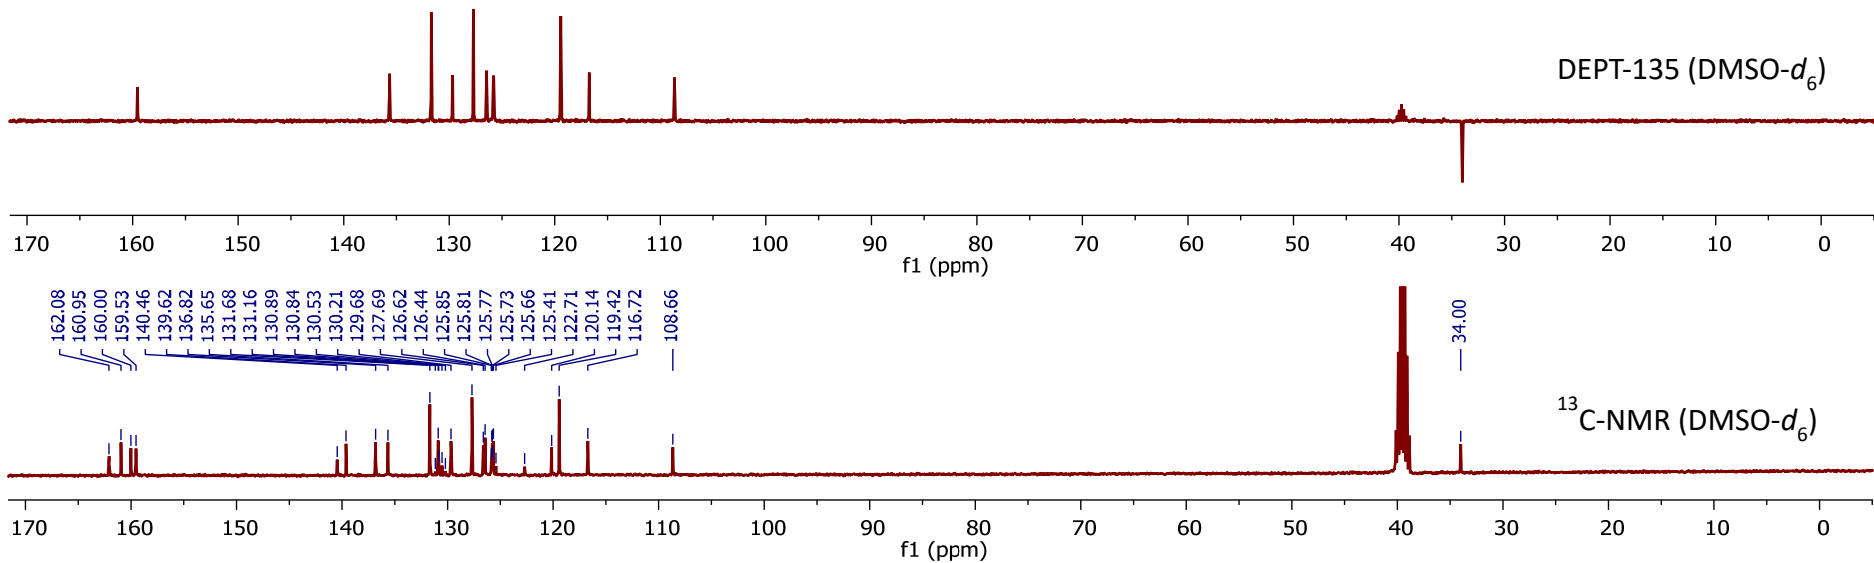

## EI MS (70eV)

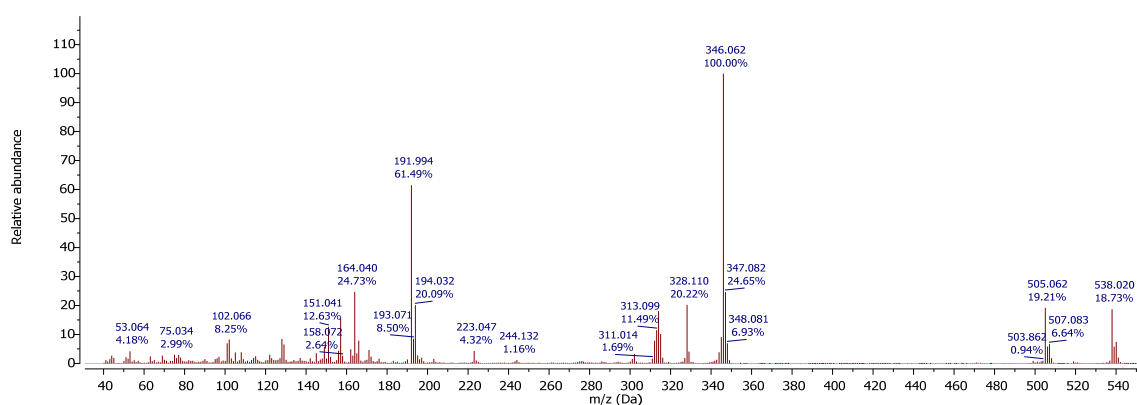

## ESI-QTOF (positive ionization)

MS Zoomed Spectrum

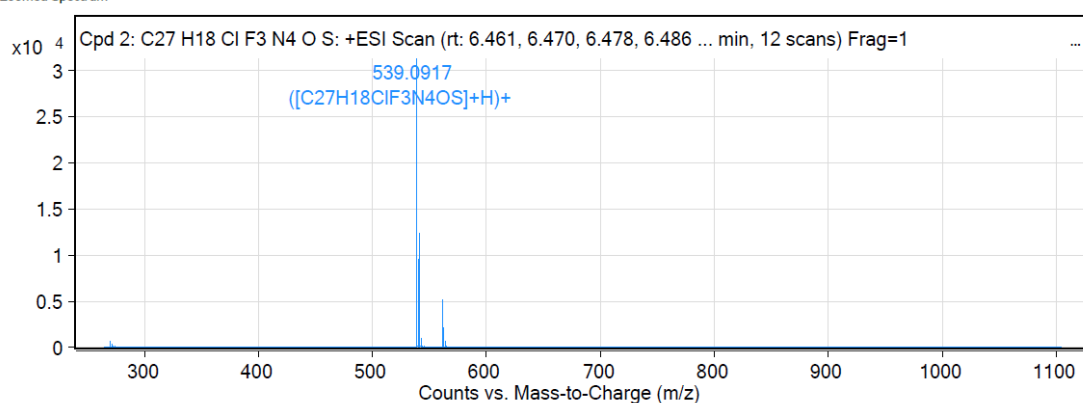

### MS Spectrum Peak List

| m/z       | Calc m/z  | Diff(ppm) | z | Abund    | Formula        | Ion      |
|-----------|-----------|-----------|---|----------|----------------|----------|
| 270.0488  | 270.0494  | 1.95      | 2 | 644.48   | C27H18ClF3N4OS | (M+2H)+2 |
| 539.0917  | 539.0915  | -0.46     | 1 | 31643.5  | C27H18ClF3N4OS | (M+H)+   |
| 540.0945  | 540.0945  | -0.16     | 1 | 9793.26  | C27H18ClF3N4OS | (M+H)+   |
| 541.0895  | 541.0895  | -0.09     | 1 | 12503.29 | C27H18ClF3N4OS | (M+H)+   |
| 542.0922  | 542.0918  | -0.74     | 1 | 3917.52  | C27H18ClF3N4OS | (M+H)+   |
| 543.0892  | 543.0901  | 1.66      | 1 | 997.55   | C27H18ClF3N4OS | (M+H)+   |
| 561.0737  | 561.0734  | -0.48     | 1 | 5293.78  | C27H18ClF3N4OS | (M+Na)+  |
| 562.0777  | 562.0764  | -1.14     | 1 | 1791.7   | C27H18ClF3N4OS | (M+Na)+  |
| 563.0708  | 563.0714  | 1.05      | 1 | 2218.61  | C27H18ClF3N4OS | (M+Na)+  |
| 1099.1553 | 1099.1576 | 2.07      | 1 | 60.47    | C27H18ClF3N4OS | (2M+Na)+ |

4.28 Compound 29c

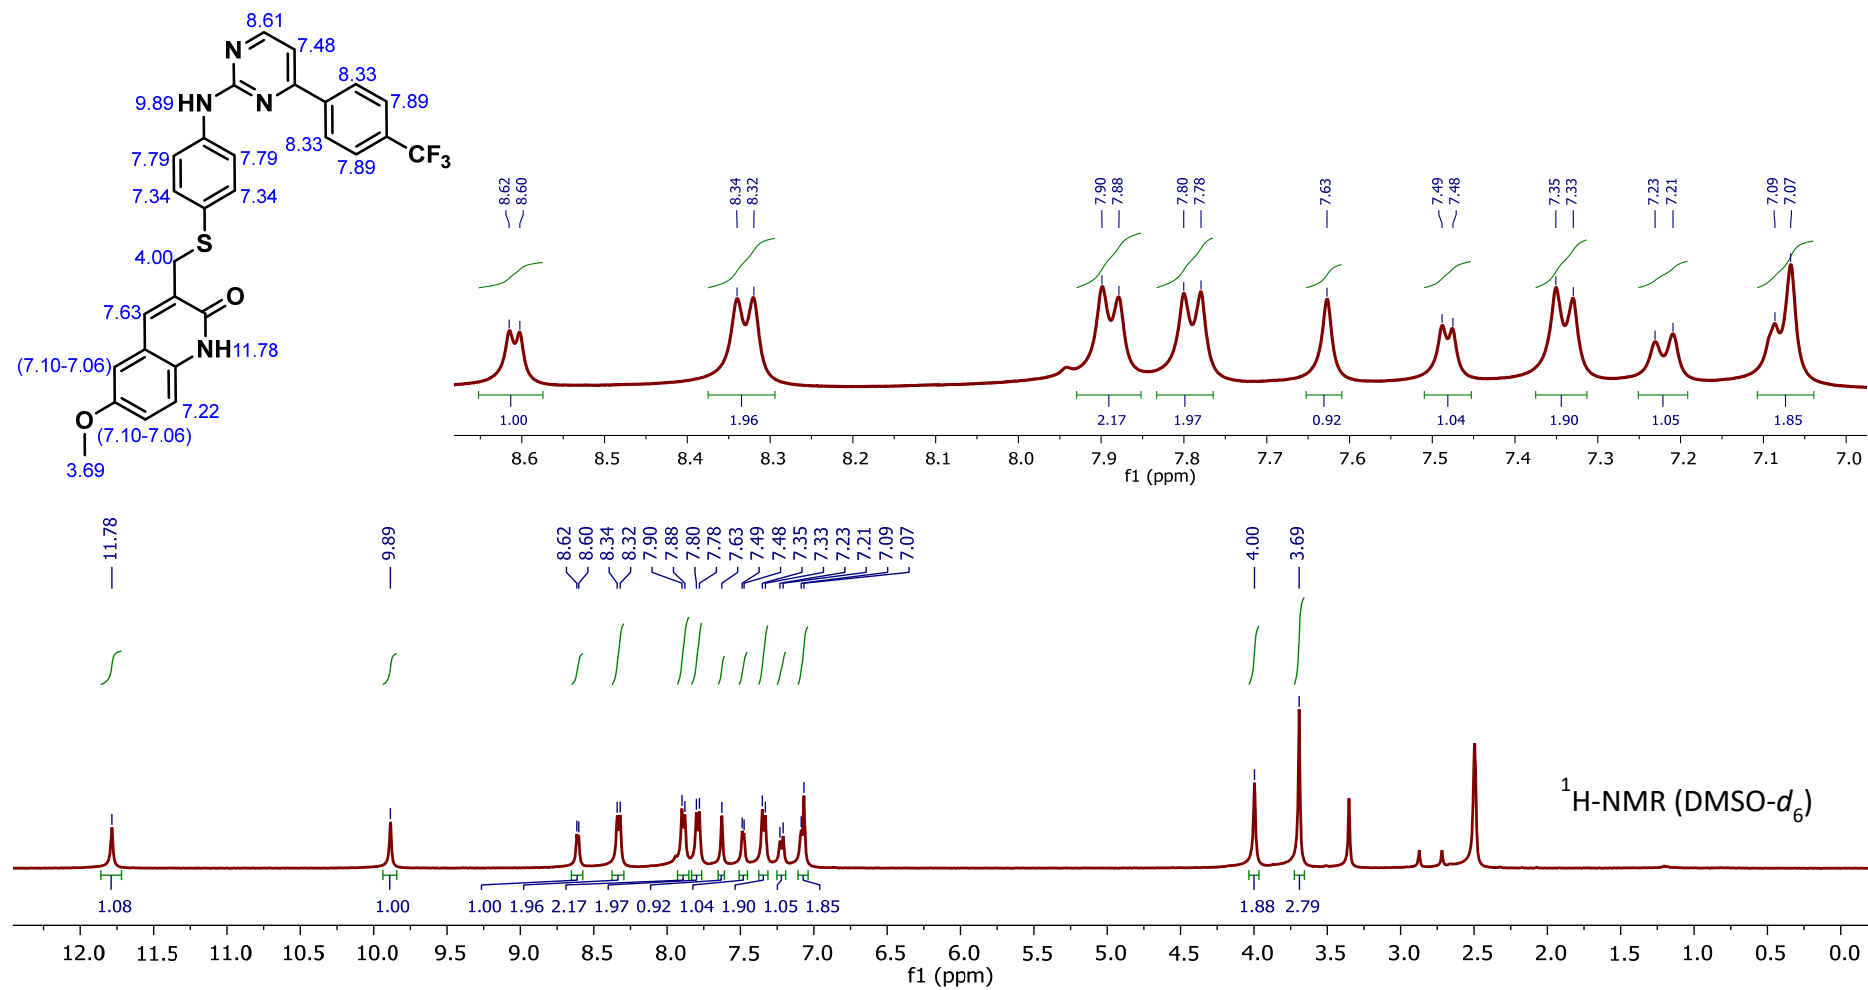

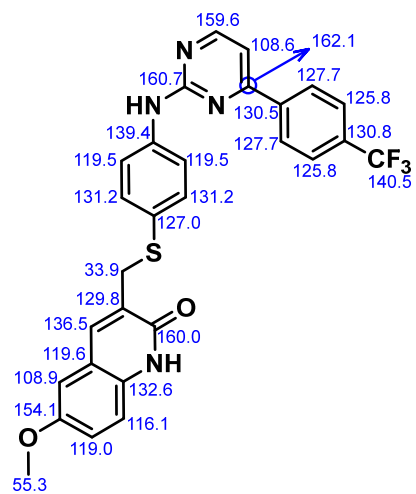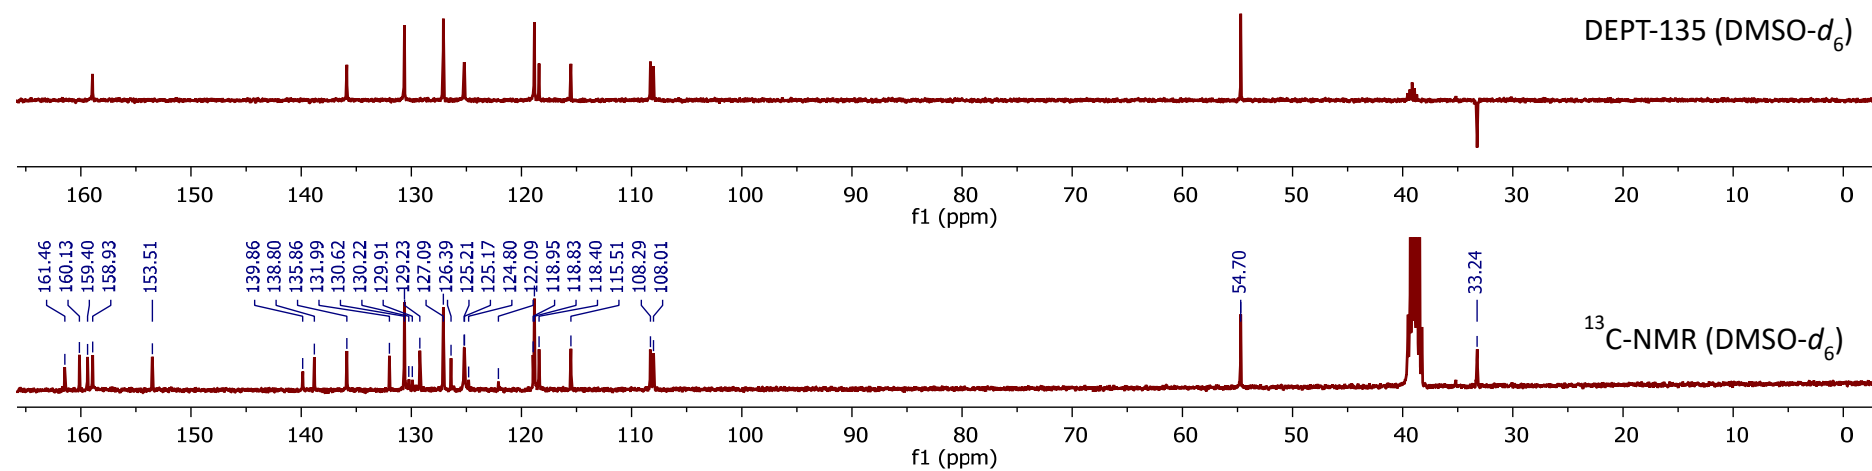

## EI MS (70eV)

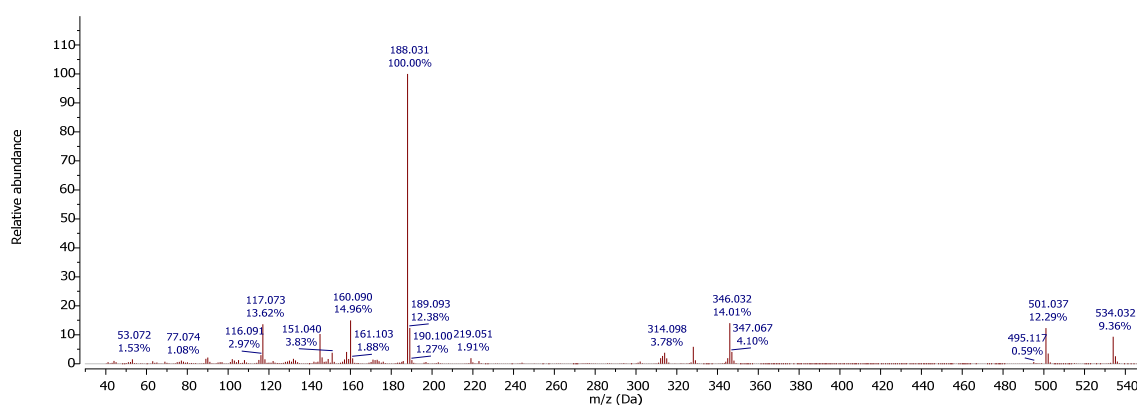

## ESI-QTOF (positive ionization)

MS Zoomed Spectrum

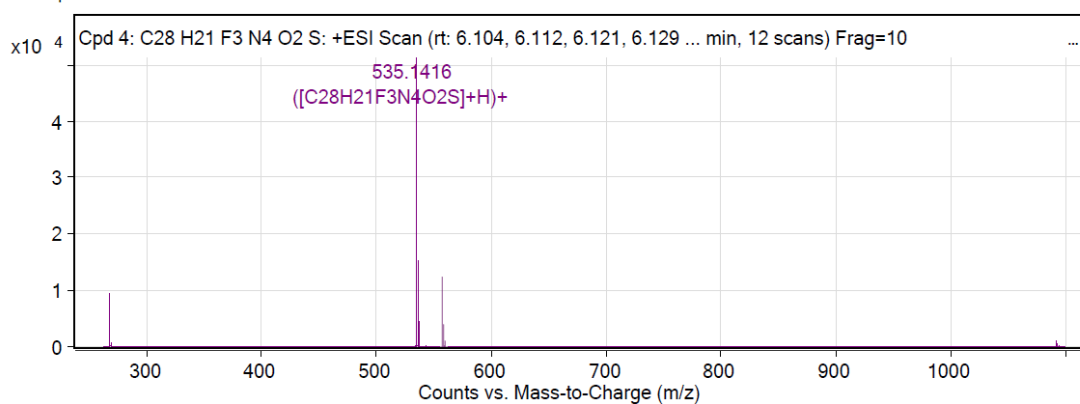

### MS Spectrum Peak List

| m/z       | Calc m/z  | Diff(ppm) | z | Abund    | Formula                                                                        | Ion                   |
|-----------|-----------|-----------|---|----------|--------------------------------------------------------------------------------|-----------------------|
| 268.0741  | 268.0741  | 0.27      | 2 | 9462.26  | C <sub>28</sub> H <sub>21</sub> F <sub>3</sub> N <sub>4</sub> O <sub>2</sub> S | (M+2H) <sup>+</sup> 2 |
| 268.5756  | 268.5756  | 0.15      | 2 | 3198.57  | C <sub>28</sub> H <sub>21</sub> F <sub>3</sub> N <sub>4</sub> O <sub>2</sub> S | (M+2H) <sup>+</sup> 2 |
| 269.0752  | 269.0748  | -1.14     | 2 | 934.05   | C <sub>28</sub> H <sub>21</sub> F <sub>3</sub> N <sub>4</sub> O <sub>2</sub> S | (M+2H) <sup>+</sup> 2 |
| 535.1416  | 535.141   | -1.04     | 1 | 51348.98 | C <sub>28</sub> H <sub>21</sub> F <sub>3</sub> N <sub>4</sub> O <sub>2</sub> S | (M+H) <sup>+</sup>    |
| 536.1445  | 536.144   | -0.92     | 1 | 16004.3  | C <sub>28</sub> H <sub>21</sub> F <sub>3</sub> N <sub>4</sub> O <sub>2</sub> S | (M+H) <sup>+</sup>    |
| 537.1433  | 537.1424  | -1.55     | 1 | 4650.11  | C <sub>28</sub> H <sub>21</sub> F <sub>3</sub> N <sub>4</sub> O <sub>2</sub> S | (M+H) <sup>+</sup>    |
| 557.1231  | 557.123   | -0.22     | 1 | 12574.94 | C <sub>28</sub> H <sub>21</sub> F <sub>3</sub> N <sub>4</sub> O <sub>2</sub> S | (M+Na) <sup>+</sup>   |
| 558.1263  | 558.126   | -0.7      | 1 | 4061.59  | C <sub>28</sub> H <sub>21</sub> F <sub>3</sub> N <sub>4</sub> O <sub>2</sub> S | (M+Na) <sup>+</sup>   |
| 559.1251  | 559.1244  | -1.35     | 1 | 1216.16  | C <sub>28</sub> H <sub>21</sub> F <sub>3</sub> N <sub>4</sub> O <sub>2</sub> S | (M+Na) <sup>+</sup>   |
| 1091.2563 | 1091.2567 | 0.31      | 1 | 1051.75  | C <sub>28</sub> H <sub>21</sub> F <sub>3</sub> N <sub>4</sub> O <sub>2</sub> S | (2M+Na) <sup>+</sup>  |

4.29 Compound 30a

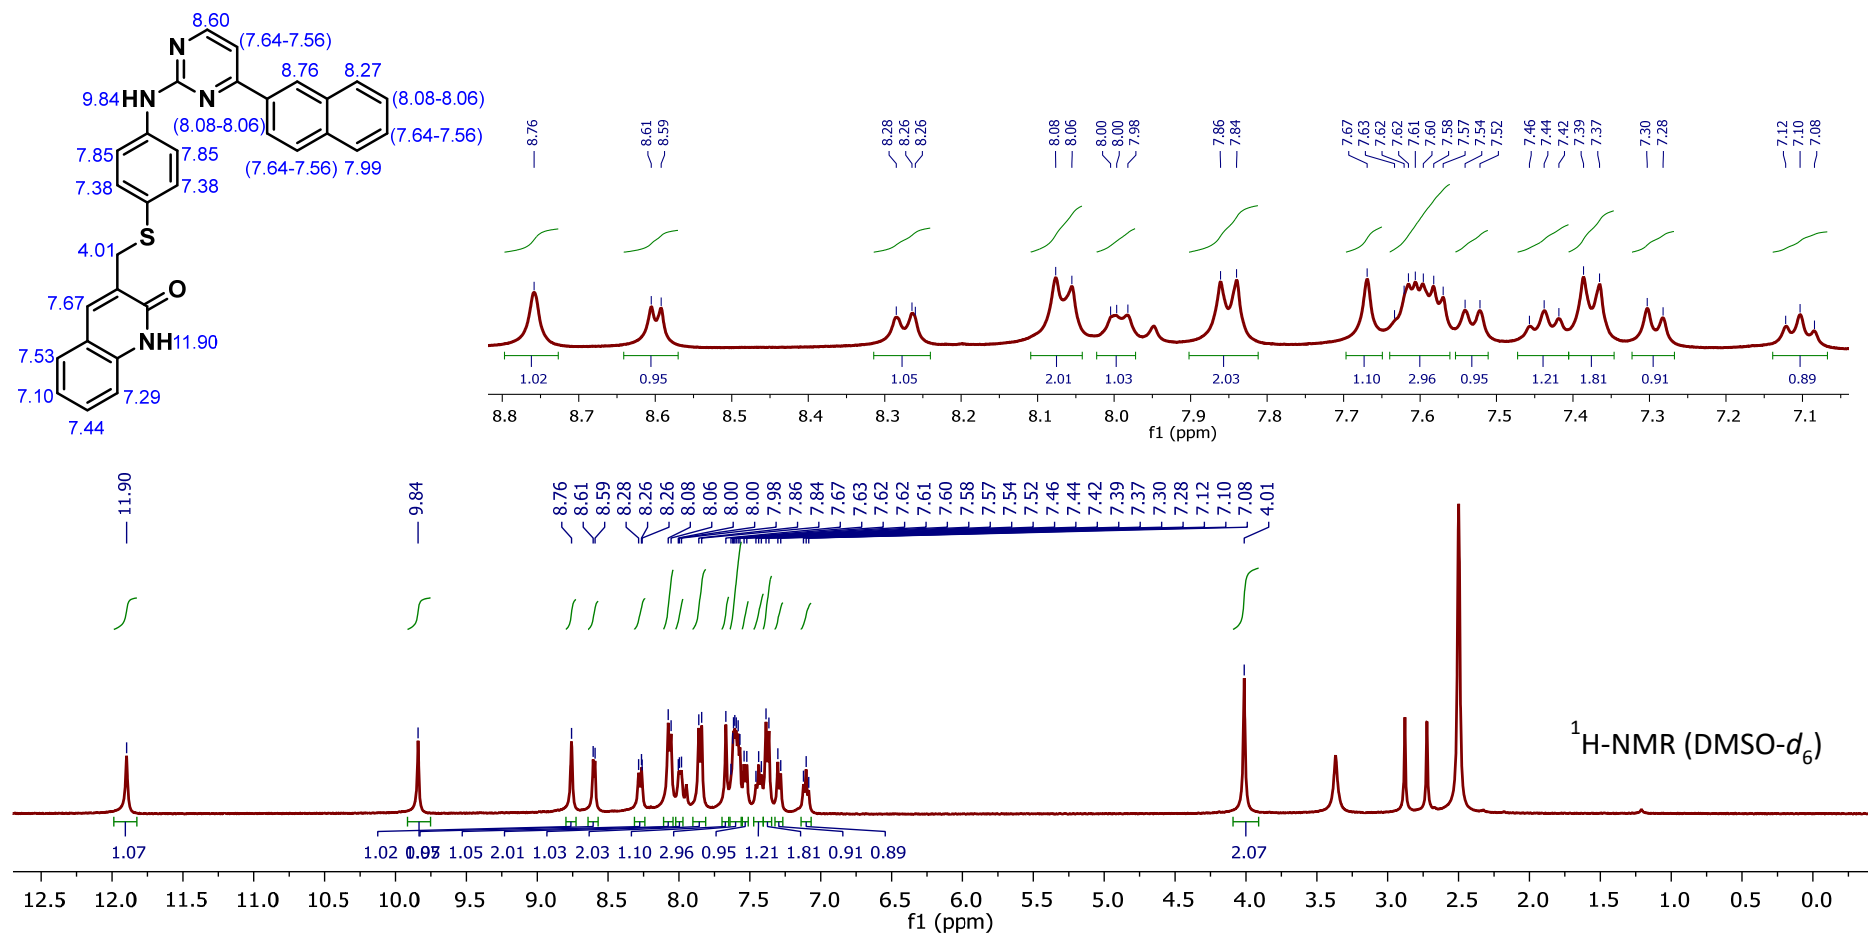

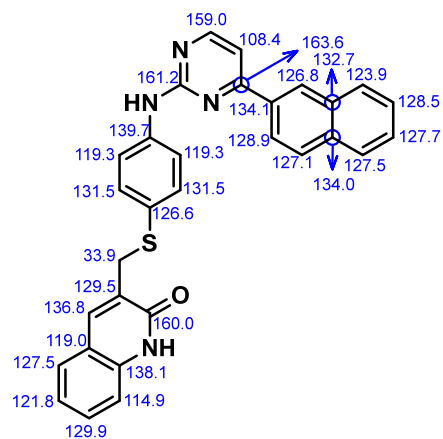

DEPT-135 ( $\text{DMSO}-d_6$ )

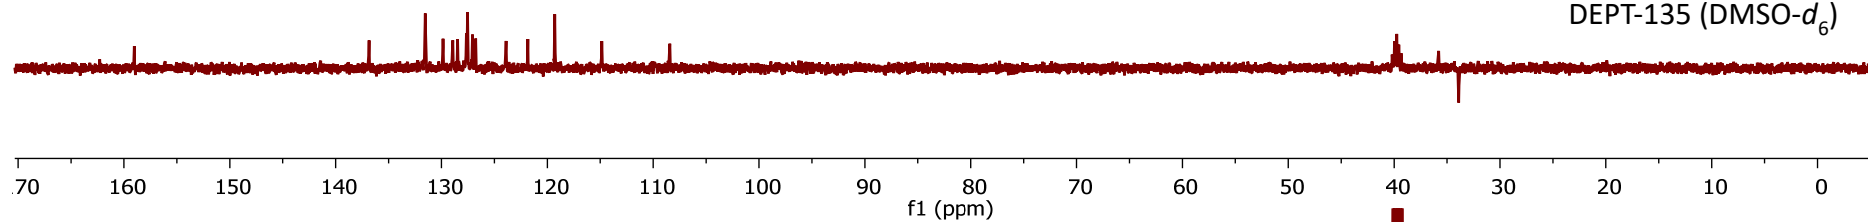

$^{13}\text{C}$ -NMR ( $\text{DMSO}-d_6$ )

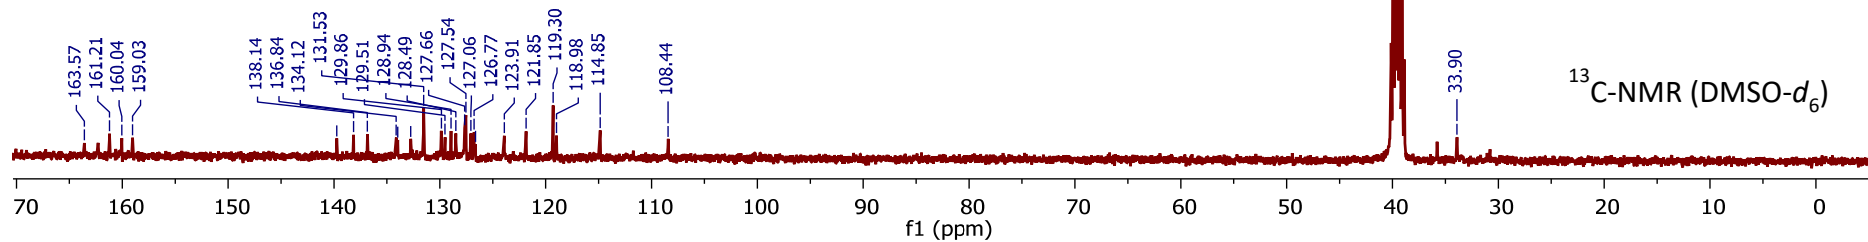

EI MS (70eV)

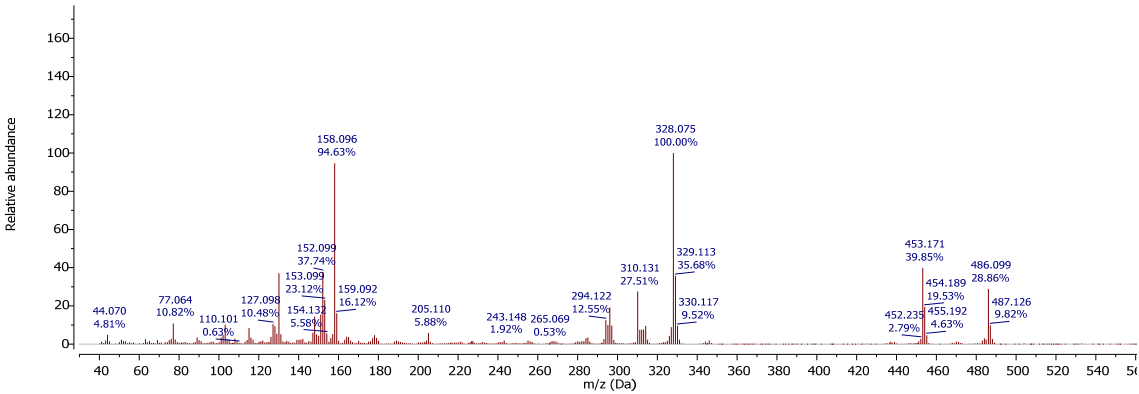

ESI-QTOF (positive ionization)

MS Zoomed Spectrum

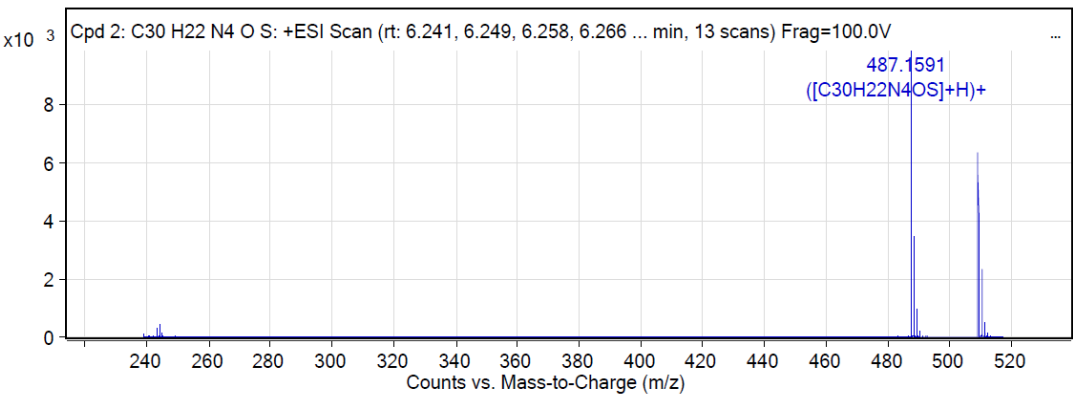

MS Spectrum Peak List

| m/z      | Calc m/z | Diff(ppm) | z | Abund | Formula                                                   | Ion      |
|----------|----------|-----------|---|-------|-----------------------------------------------------------|----------|
| 244.0825 | 244.083  |           | 2 |       | 497.6 C <sub>30</sub> H <sub>22</sub> N <sub>4</sub> OS   | (M+2H)+2 |
| 244.5853 | 244.5845 | -3.32     | 2 |       | 121.62 C <sub>30</sub> H <sub>22</sub> N <sub>4</sub> OS  | (M+2H)+2 |
| 245.0794 | 245.0838 | 18.26     | 2 |       | 54.57 C <sub>30</sub> H <sub>22</sub> N <sub>4</sub> OS   | (M+2H)+2 |
| 487.1591 | 487.1587 | -0.73     | 1 |       | 9911.09 C <sub>30</sub> H <sub>22</sub> N <sub>4</sub> OS | (M+H)+   |
| 488.1618 | 488.1617 | -0.18     | 1 |       | 3507.15 C <sub>30</sub> H <sub>22</sub> N <sub>4</sub> OS | (M+H)+   |
| 489.161  | 489.1604 | -1.3      | 1 |       | 998.93 C <sub>30</sub> H <sub>22</sub> N <sub>4</sub> OS  | (M+H)+   |
| 509.1411 | 509.1407 | -0.95     | 1 |       | 6441.07 C <sub>30</sub> H <sub>22</sub> N <sub>4</sub> OS | (M+Na)+  |
| 510.1432 | 510.1437 |           | 1 |       | 2417.24 C <sub>30</sub> H <sub>22</sub> N <sub>4</sub> OS | (M+Na)+  |
| 511.1432 | 511.1423 | -1.77     | 1 |       | 575.29 C <sub>30</sub> H <sub>22</sub> N <sub>4</sub> OS  | (M+Na)+  |
| 512.1463 | 512.1428 | -6.91     | 1 |       | 102.76 C <sub>30</sub> H <sub>22</sub> N <sub>4</sub> OS  | (M+Na)+  |



4.30      Compound 30b

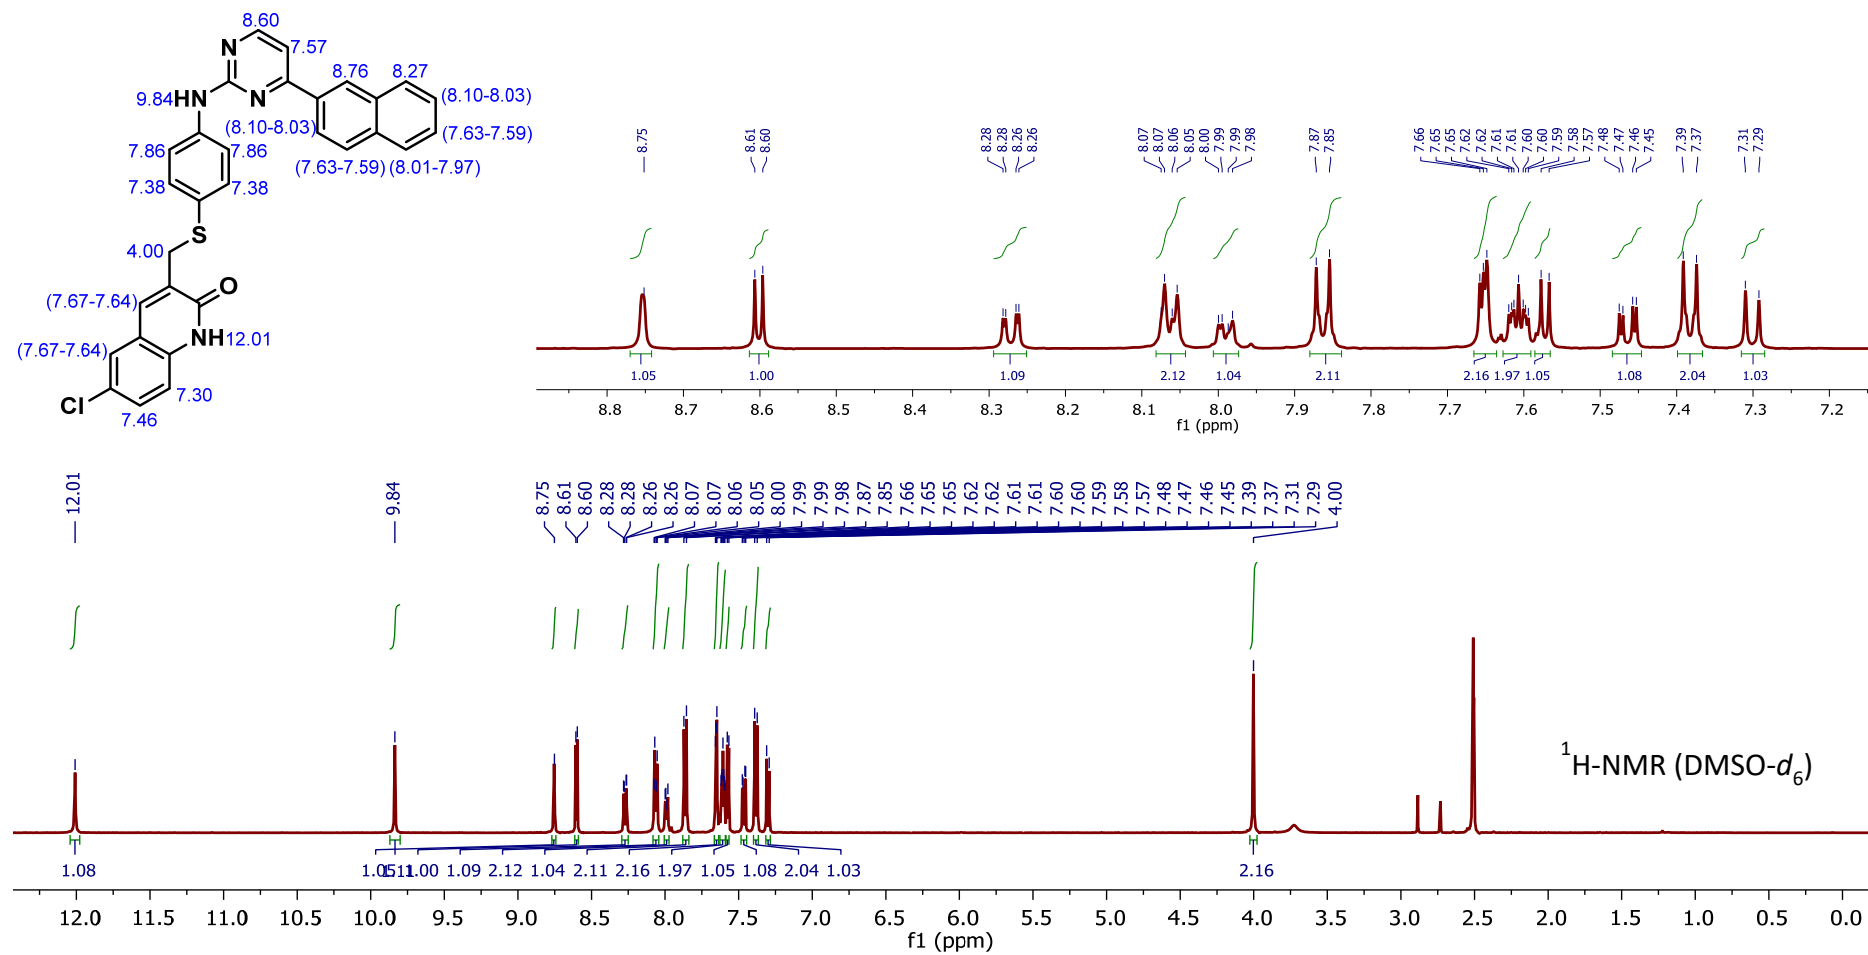

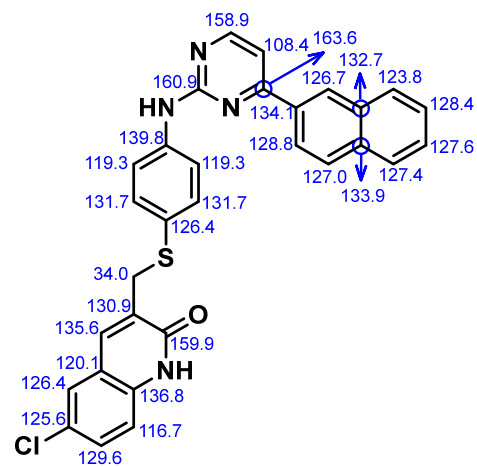

DEPT-135 ( $\text{DMSO}-d_6$ )

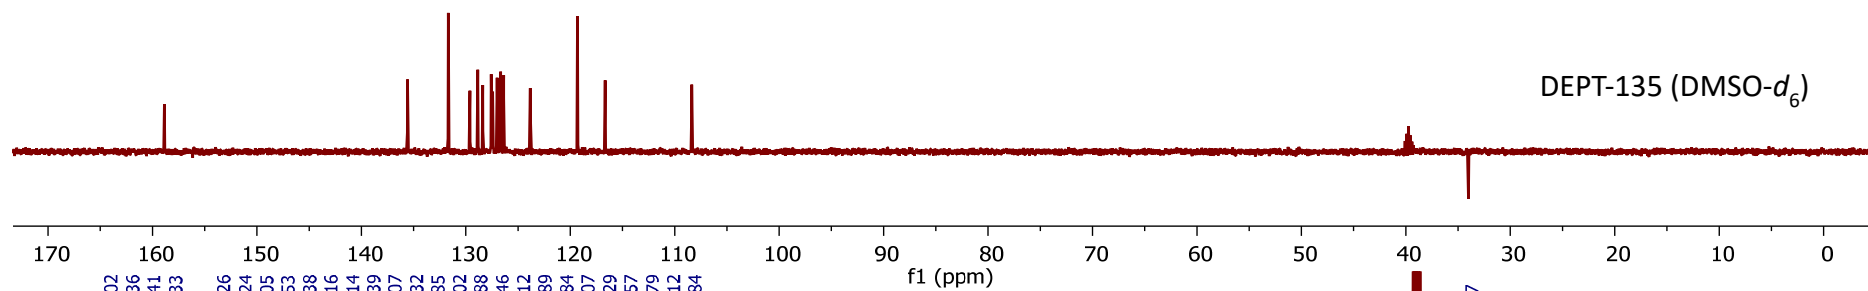

$^{13}\text{C}$ -NMR ( $\text{DMSO}-d_6$ )

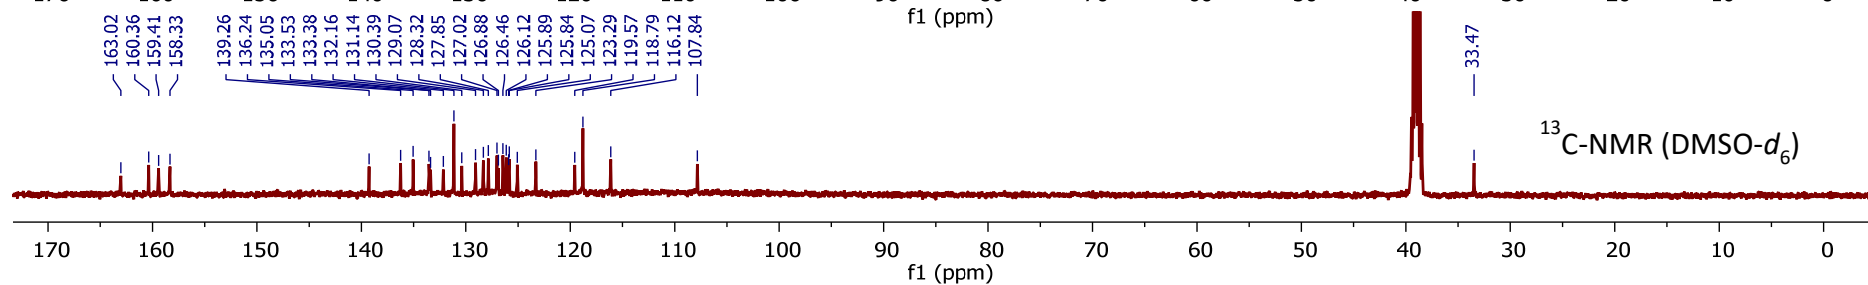

## EI MS (70eV)

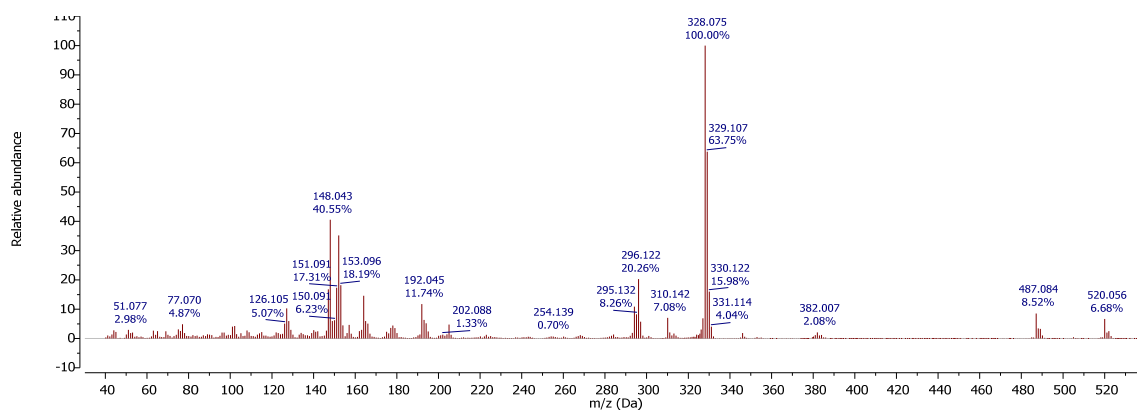

## ESI-QTOF (positive ionization)

MS Zoomed Spectrum

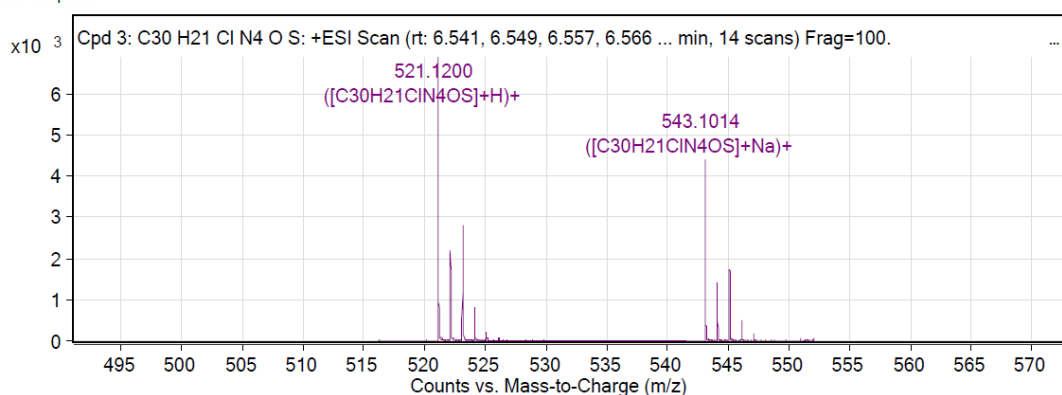

### MS Spectrum Peak List

| m/z      | Calc m/z | Diff(ppm) | z | Abund   | Formula                                                           | Ion                 |
|----------|----------|-----------|---|---------|-------------------------------------------------------------------|---------------------|
| 521.12   | 521.1197 | -0.43     | 1 | 6953.13 | C <sub>30</sub> H <sub>21</sub> ClN <sub>4</sub> O <sub>5</sub> S | (M+H) <sup>+</sup>  |
| 522.1225 | 522.1228 | 0.41      | 1 | 2321.15 | C <sub>30</sub> H <sub>21</sub> ClN <sub>4</sub> O <sub>5</sub> S | (M+H) <sup>+</sup>  |
| 523.1184 | 523.1179 | -0.9      | 1 | 2869.15 | C <sub>30</sub> H <sub>21</sub> ClN <sub>4</sub> O <sub>5</sub> S | (M+H) <sup>+</sup>  |
| 524.1206 | 524.1201 | -0.91     | 1 | 840.5   | C <sub>30</sub> H <sub>21</sub> ClN <sub>4</sub> O <sub>5</sub> S | (M+H) <sup>+</sup>  |
| 525.1218 | 525.1189 | -5.56     | 1 | 235.49  | C <sub>30</sub> H <sub>21</sub> ClN <sub>4</sub> O <sub>5</sub> S | (M+H) <sup>+</sup>  |
| 543.1014 | 543.1017 | 0.59      | 1 | 4442.43 | C <sub>30</sub> H <sub>21</sub> ClN <sub>4</sub> O <sub>5</sub> S | (M+Na) <sup>+</sup> |
| 544.1049 | 544.1047 | -0.44     | 1 | 1485.43 | C <sub>30</sub> H <sub>21</sub> ClN <sub>4</sub> O <sub>5</sub> S | (M+Na) <sup>+</sup> |
| 545.0992 | 545.0999 | 1.25      | 1 | 1813.92 | C <sub>30</sub> H <sub>21</sub> ClN <sub>4</sub> O <sub>5</sub> S | (M+Na) <sup>+</sup> |
| 546.1036 | 546.1021 | -2.75     | 1 | 545.87  | C <sub>30</sub> H <sub>21</sub> ClN <sub>4</sub> O <sub>5</sub> S | (M+Na) <sup>+</sup> |
| 547.101  | 547.1009 | -0.21     | 1 | 175.92  | C <sub>30</sub> H <sub>21</sub> ClN <sub>4</sub> O <sub>5</sub> S | (M+Na) <sup>+</sup> |

4.31 Compound 30c

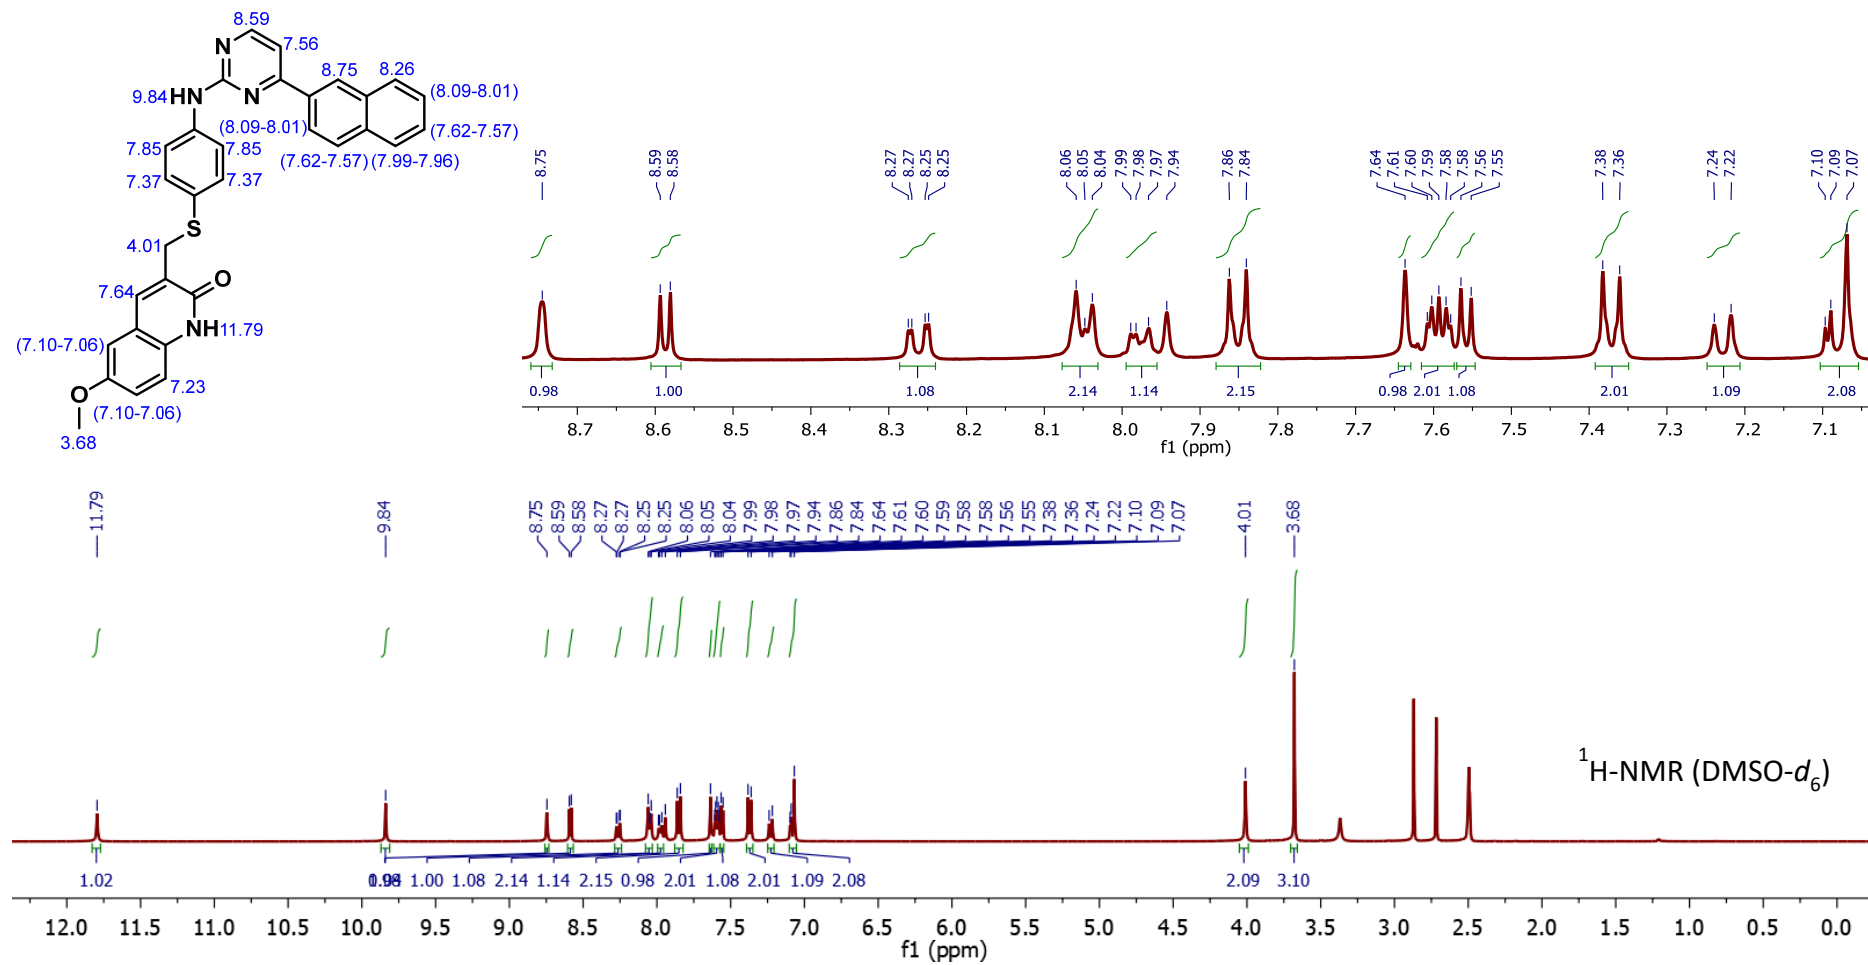

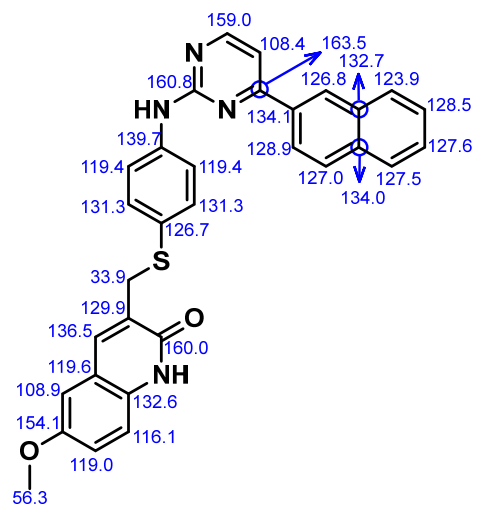

DEPT-135 ( $\text{DMSO}-d_6$ )

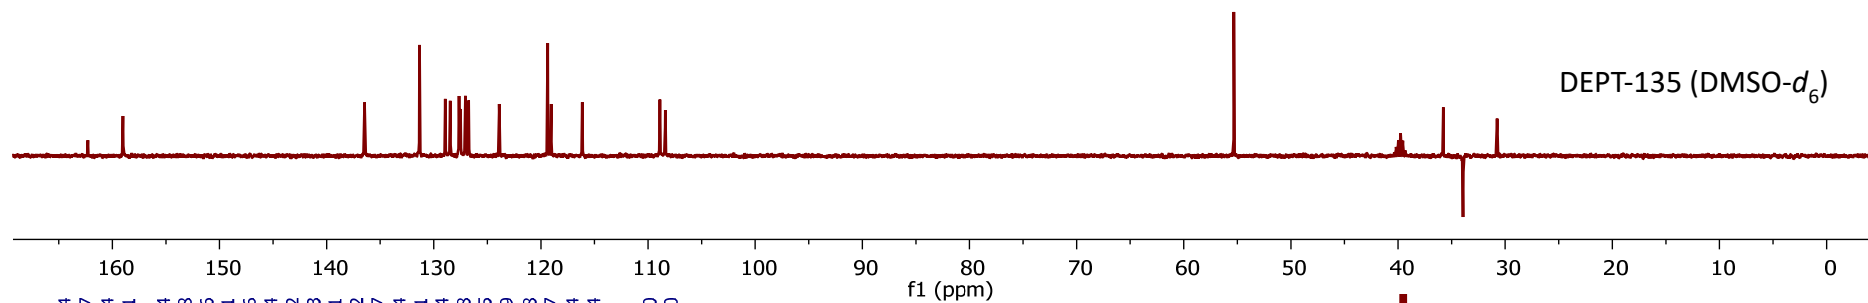

$^{13}\text{C}$ -NMR ( $\text{DMSO}-d_6$ )

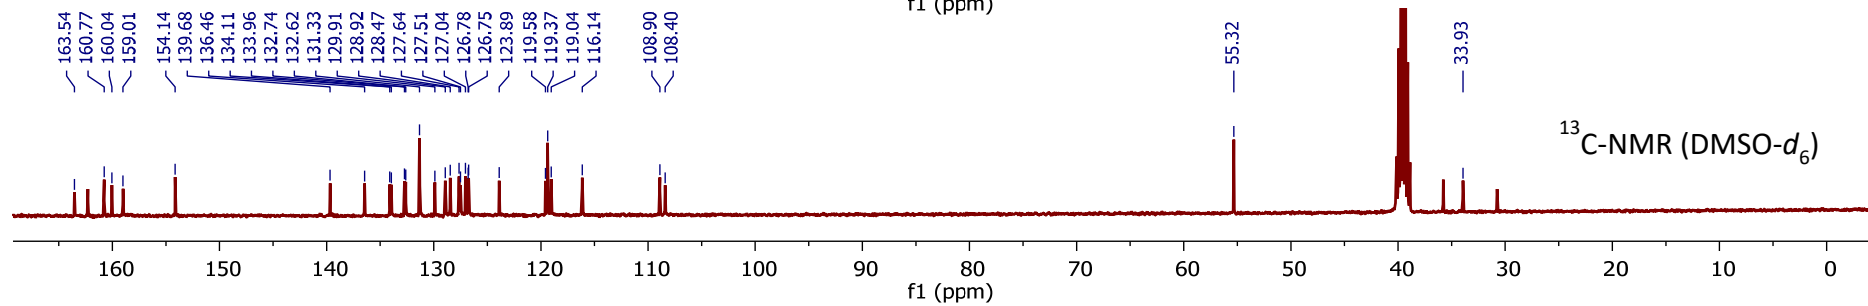

## EI MS (70eV)

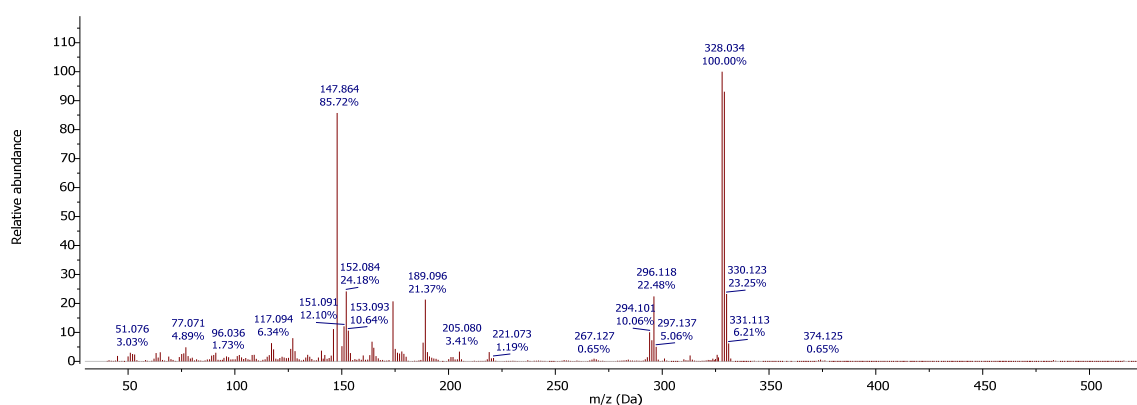

## ESI-QTOF (positive ionization)

MS Zoomed Spectrum

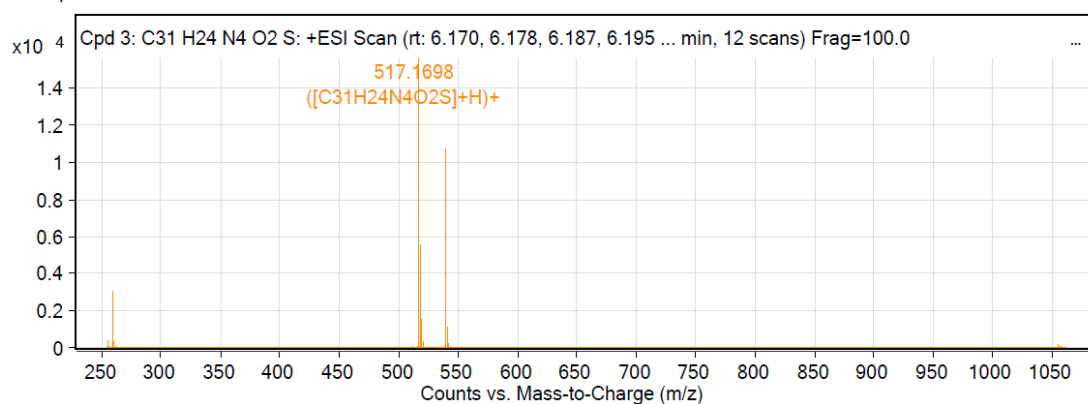

### MS Spectrum Peak List

| m/z       | Calc m/z  | Diff(ppm) | z | Abund    | Formula                                                         | Ion      |
|-----------|-----------|-----------|---|----------|-----------------------------------------------------------------|----------|
| 259.0884  | 259.0883  | -0.48     | 2 | 3151.79  | C <sub>31</sub> H <sub>24</sub> N <sub>4</sub> O <sub>2</sub> S | (M+2H)+2 |
| 259.5893  | 259.5898  | 1.98      | 2 | 1104.27  | C <sub>31</sub> H <sub>24</sub> N <sub>4</sub> O <sub>2</sub> S | (M+2H)+2 |
| 260.0897  | 260.0892  | -1.67     | 2 | 368.27   | C <sub>31</sub> H <sub>24</sub> N <sub>4</sub> O <sub>2</sub> S | (M+2H)+2 |
| 517.1698  | 517.1693  | -1.06     | 1 | 15760.97 | C <sub>31</sub> H <sub>24</sub> N <sub>4</sub> O <sub>2</sub> S | (M+H)+   |
| 518.1728  | 518.1723  | -0.94     | 1 | 5645.06  | C <sub>31</sub> H <sub>24</sub> N <sub>4</sub> O <sub>2</sub> S | (M+H)+   |
| 519.1722  | 519.1712  | -1.98     | 1 | 1609.85  | C <sub>31</sub> H <sub>24</sub> N <sub>4</sub> O <sub>2</sub> S | (M+H)+   |
| 539.1517  | 539.1512  | -0.93     | 1 | 11045.04 | C <sub>31</sub> H <sub>24</sub> N <sub>4</sub> O <sub>2</sub> S | (M+Na)+  |
| 540.1551  | 540.1543  | -1.52     | 1 | 3947.27  | C <sub>31</sub> H <sub>24</sub> N <sub>4</sub> O <sub>2</sub> S | (M+Na)+  |
| 541.155   | 541.1531  | -3.5      | 1 | 1184.69  | C <sub>31</sub> H <sub>24</sub> N <sub>4</sub> O <sub>2</sub> S | (M+Na)+  |
| 1055.3142 | 1055.3132 | -0.95     | 1 | 210.75   | C <sub>31</sub> H <sub>24</sub> N <sub>4</sub> O <sub>2</sub> S | (2M+Na)+ |

4.32 Compound 31a

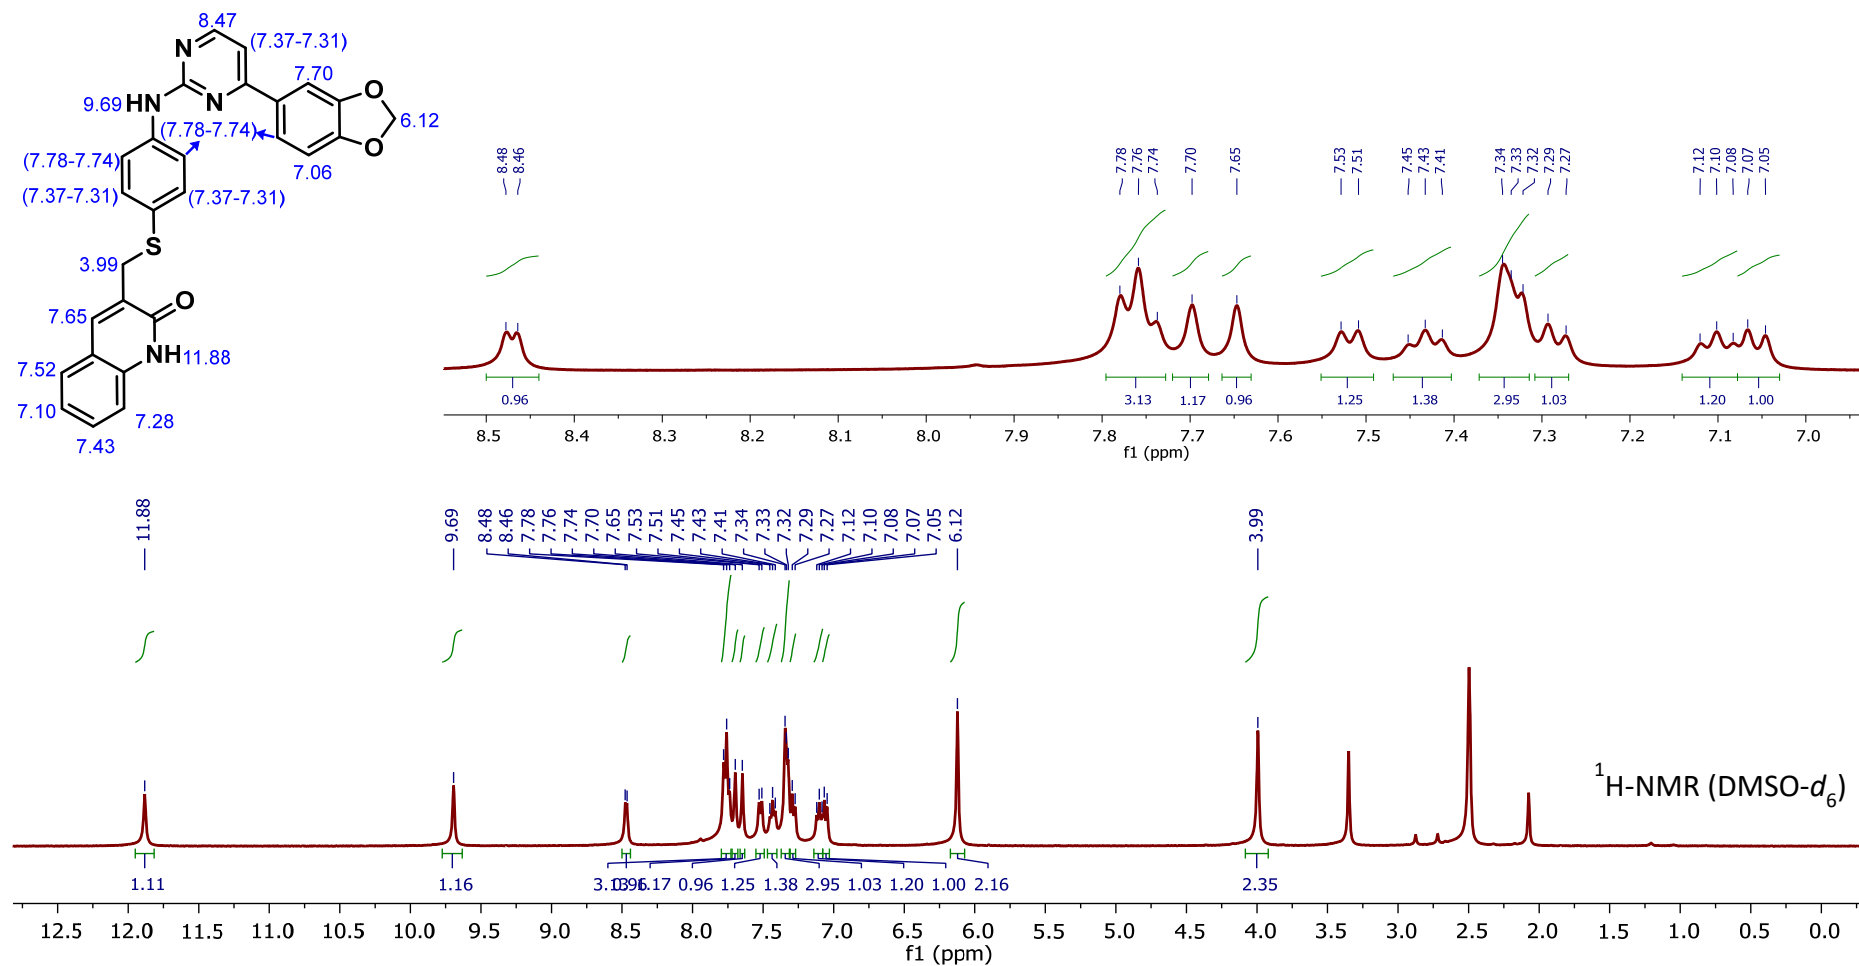

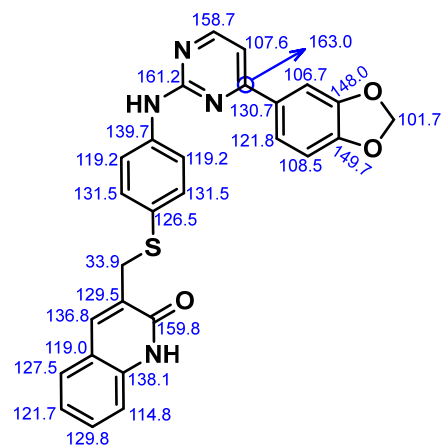

DEPT-135 ( $\text{DMSO}-d_6$ )

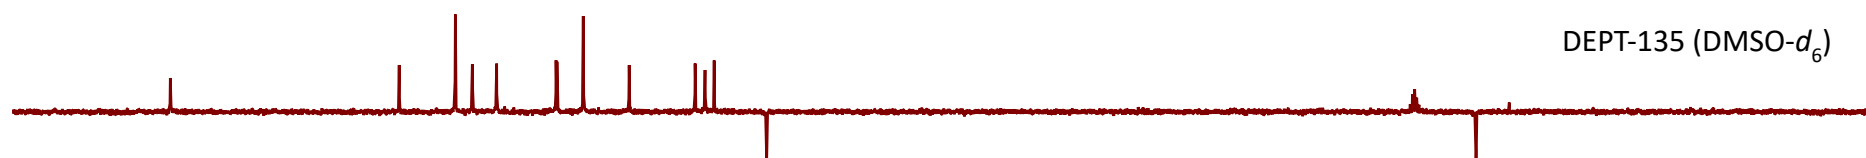

$^{13}\text{C}$ -NMR ( $\text{DMSO}-d_6$ )

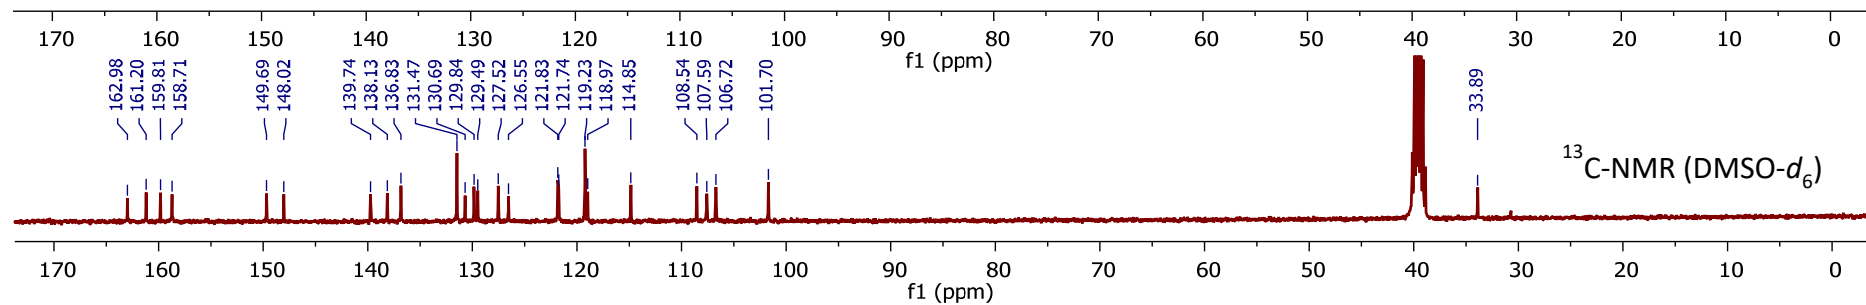



## EI MS (70eV)

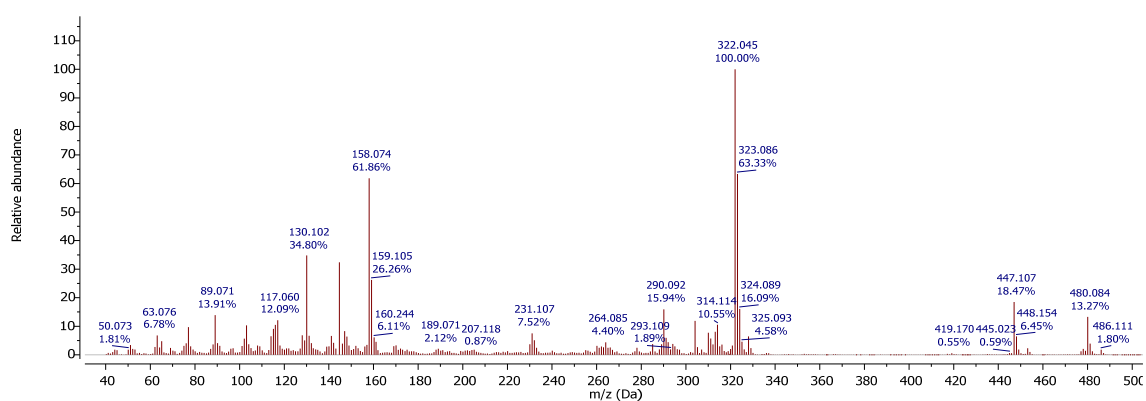

## ESI-QTOF (positive ionization)

MS Zoomed Spectrum

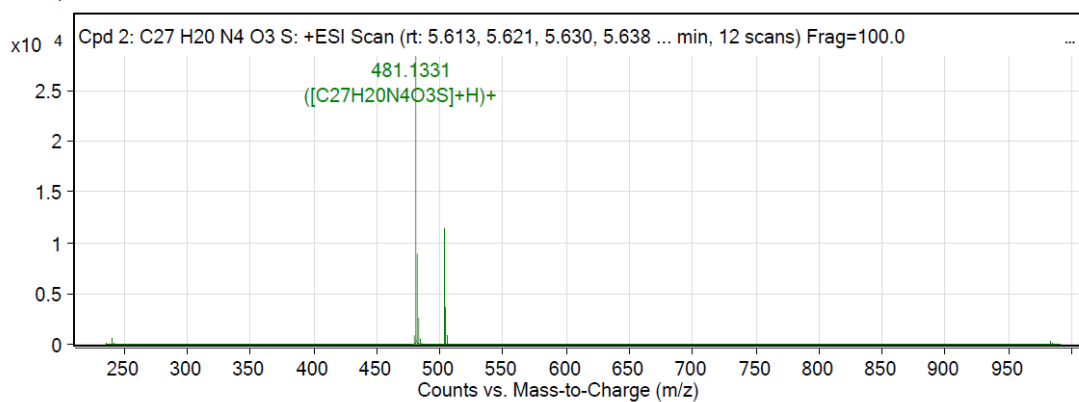

### MS Spectrum Peak List

| m/z      | Calc m/z | Diff(ppm) | z | Abund    | Formula                                                         | Ion      |
|----------|----------|-----------|---|----------|-----------------------------------------------------------------|----------|
| 241.0696 | 241.0701 | 1.93      | 2 | 654.72   | C <sub>27</sub> H <sub>20</sub> N <sub>4</sub> O <sub>3</sub> S | (M+2H)+2 |
| 481.1331 | 481.1329 | -0.47     | 1 | 29280.21 | C <sub>27</sub> H <sub>20</sub> N <sub>4</sub> O <sub>3</sub> S | (M+H)+   |
| 482.1361 | 482.1359 | -0.51     | 1 | 8975.86  | C <sub>27</sub> H <sub>20</sub> N <sub>4</sub> O <sub>3</sub> S | (M+H)+   |
| 483.1347 | 483.1342 | -1.13     | 1 | 2638.49  | C <sub>27</sub> H <sub>20</sub> N <sub>4</sub> O <sub>3</sub> S | (M+H)+   |
| 503.115  | 503.1148 | -0.28     | 1 | 11622.33 | C <sub>27</sub> H <sub>20</sub> N <sub>4</sub> O <sub>3</sub> S | (M+Na)+  |
| 504.1176 | 504.1178 | 0.4       | 1 | 3718.28  | C <sub>27</sub> H <sub>20</sub> N <sub>4</sub> O <sub>3</sub> S | (M+Na)+  |
| 505.1169 | 505.1161 | -1.49     | 1 | 1042.77  | C <sub>27</sub> H <sub>20</sub> N <sub>4</sub> O <sub>3</sub> S | (M+Na)+  |
| 506.1125 | 506.1169 | 8.6       | 1 | 186.36   | C <sub>27</sub> H <sub>20</sub> N <sub>4</sub> O <sub>3</sub> S | (M+Na)+  |
| 983.2422 | 983.2404 | -1.77     | 1 | 352.25   | C <sub>27</sub> H <sub>20</sub> N <sub>4</sub> O <sub>3</sub> S | (2M+Na)+ |
| 984.2449 | 984.2434 | -1.44     | 1 | 200.29   | C <sub>27</sub> H <sub>20</sub> N <sub>4</sub> O <sub>3</sub> S | (2M+Na)+ |

4.33 Compound 31b

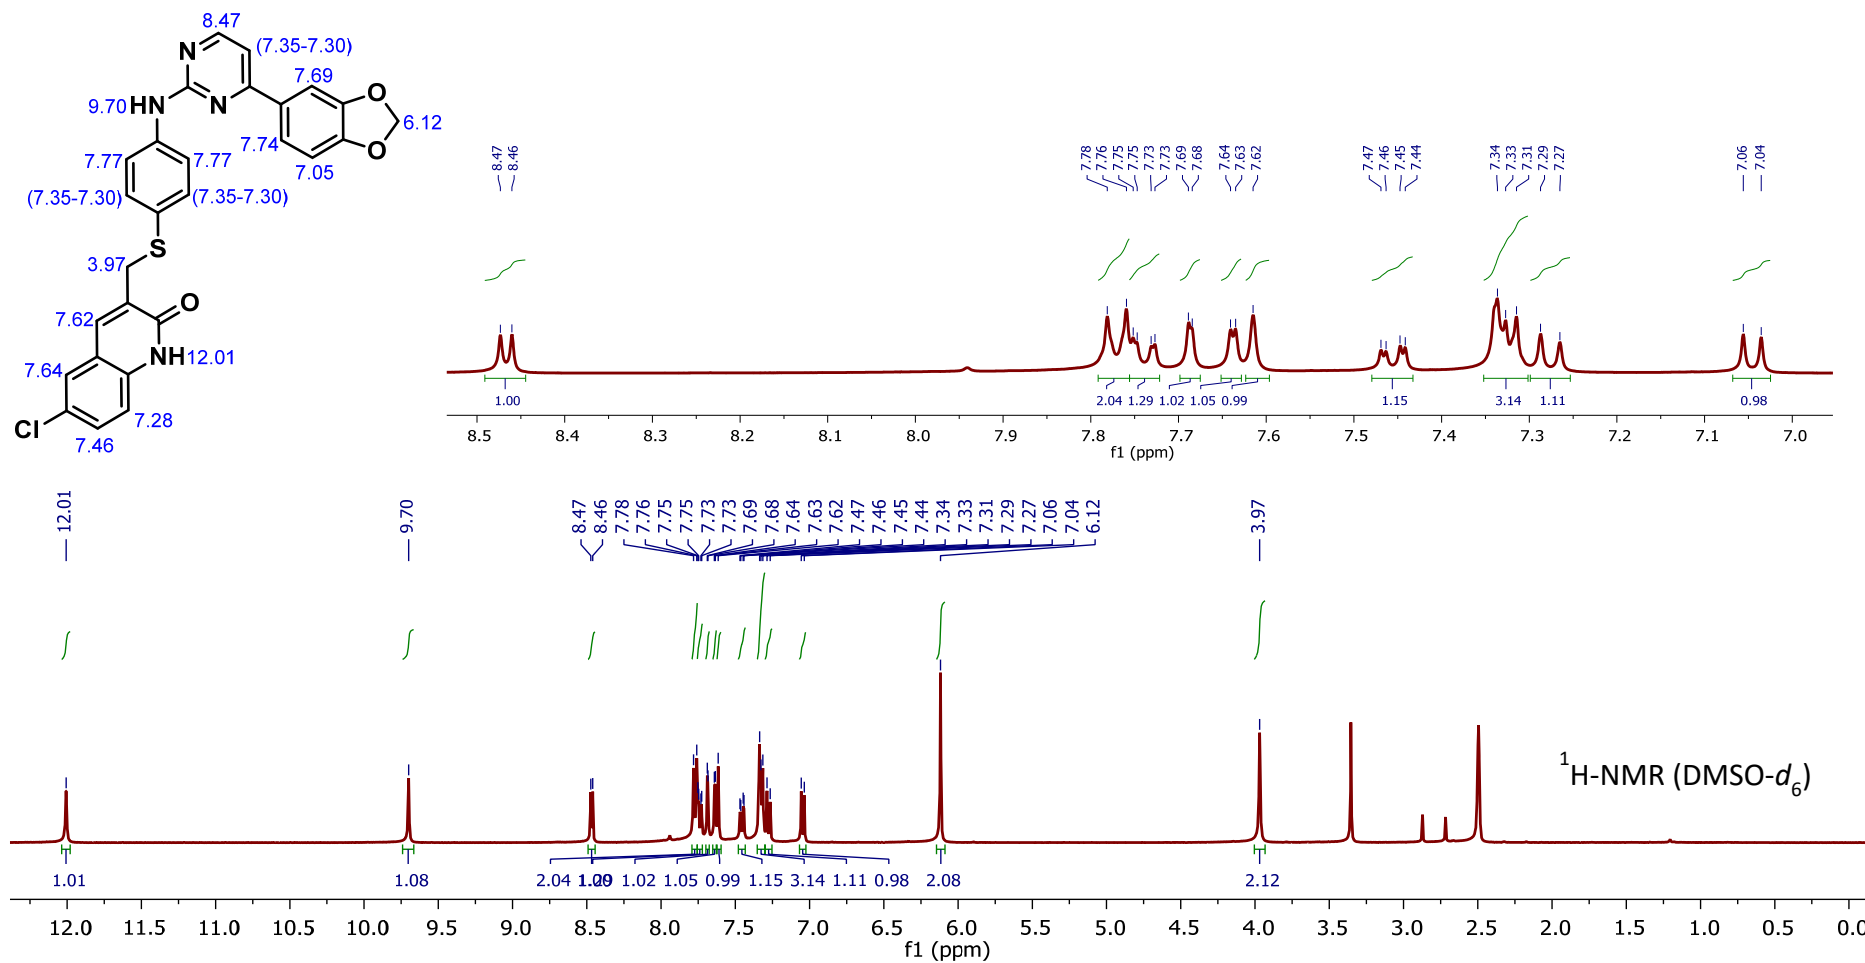

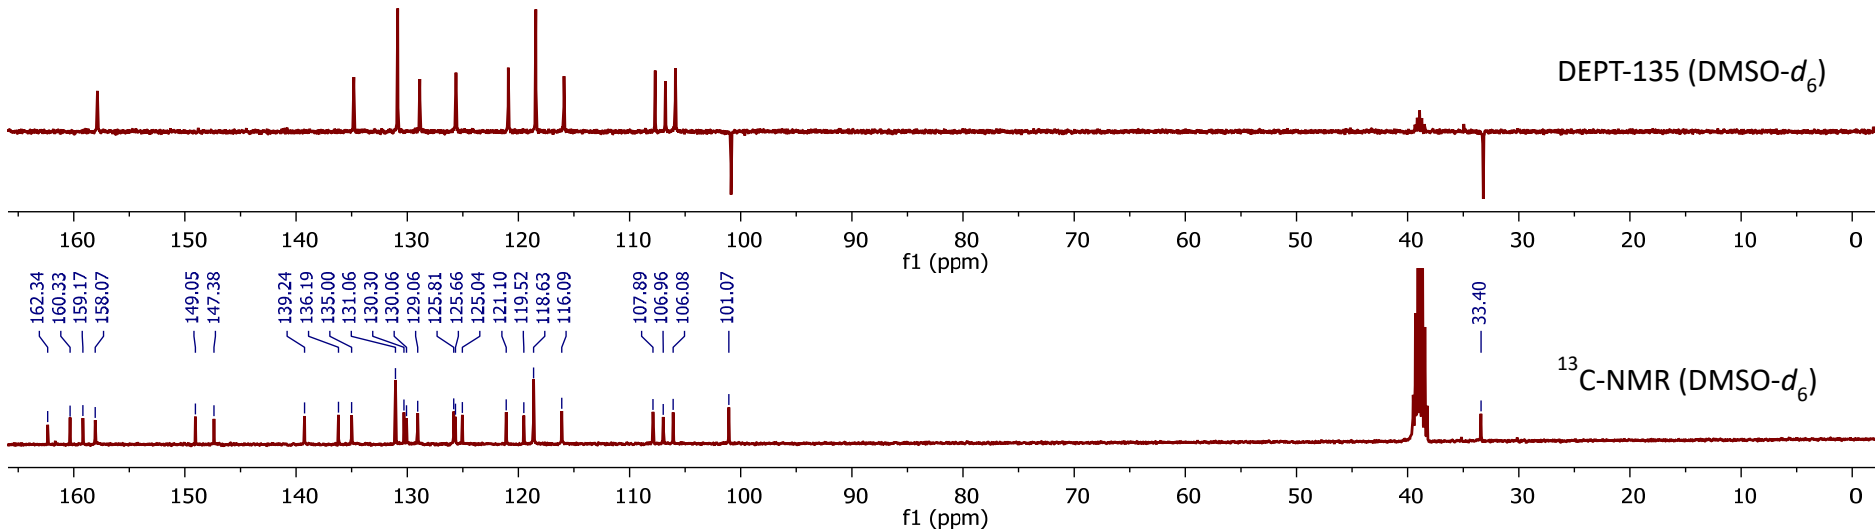

## EI MS (70eV)

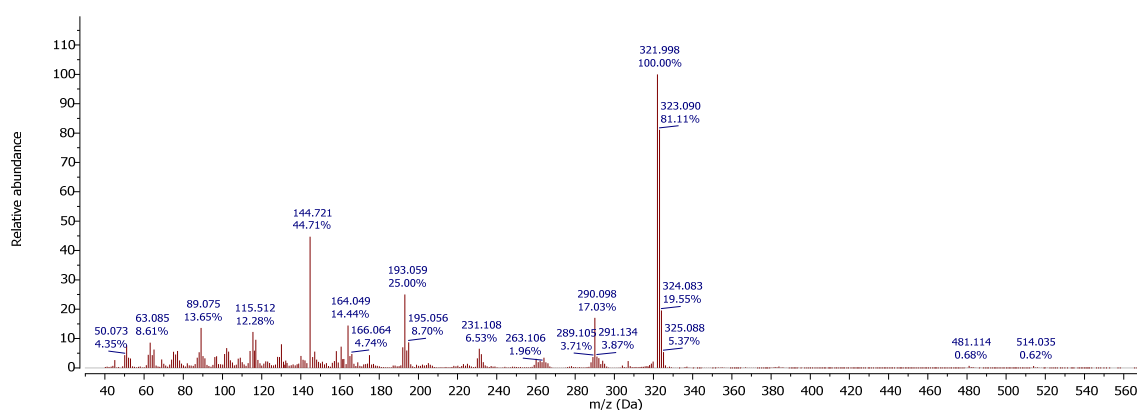

## ESI-QTOF (positive ionization)

MS Zoomed Spectrum

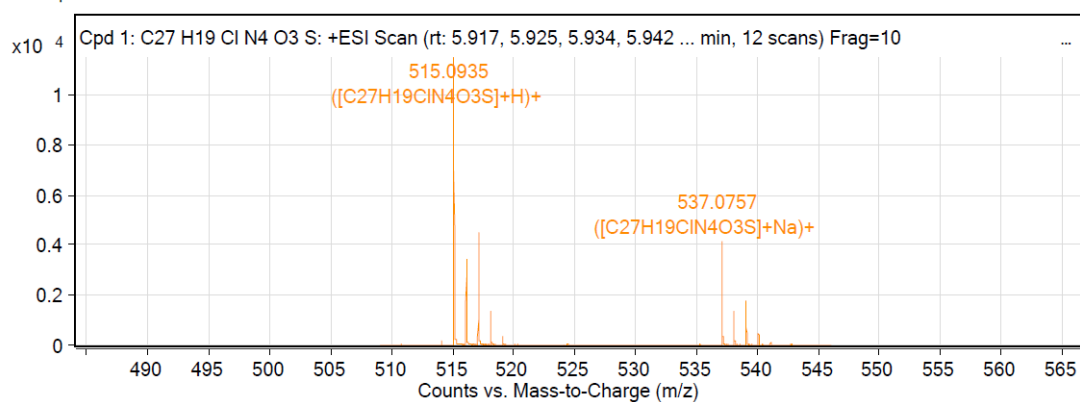

### MS Spectrum Peak List

| m/z      | Calc m/z | Diff(ppm) | z | Abund    | Formula                                                           | Ion     |
|----------|----------|-----------|---|----------|-------------------------------------------------------------------|---------|
| 514.085  | 514.0861 | 2.22      | 1 | 145.65   | C <sub>27</sub> H <sub>19</sub> ClN <sub>4</sub> O <sub>3</sub> S | M+      |
| 515.0935 | 515.0939 | 0.84      | 1 | 11522.77 | C <sub>27</sub> H <sub>19</sub> ClN <sub>4</sub> O <sub>3</sub> S | (M+H)+  |
| 516.0969 | 516.0969 | 0.05      | 1 | 3560.53  | C <sub>27</sub> H <sub>19</sub> ClN <sub>4</sub> O <sub>3</sub> S | (M+H)+  |
| 517.0919 | 517.092  | 0.16      | 1 | 4642.79  | C <sub>27</sub> H <sub>19</sub> ClN <sub>4</sub> O <sub>3</sub> S | (M+H)+  |
| 518.0935 | 518.0943 | 1.54      | 1 | 1356.07  | C <sub>27</sub> H <sub>19</sub> ClN <sub>4</sub> O <sub>3</sub> S | (M+H)+  |
| 519.0937 | 519.0927 | -1.93     | 1 | 351.39   | C <sub>27</sub> H <sub>19</sub> ClN <sub>4</sub> O <sub>3</sub> S | (M+H)+  |
| 537.0757 | 537.0759 | 0.23      | 1 | 4185.63  | C <sub>27</sub> H <sub>19</sub> ClN <sub>4</sub> O <sub>3</sub> S | (M+Na)+ |
| 538.0784 | 538.0788 | 0.85      | 1 | 1410.28  | C <sub>27</sub> H <sub>19</sub> ClN <sub>4</sub> O <sub>3</sub> S | (M+Na)+ |
| 539.0735 | 539.0739 | 0.8       | 1 | 1793.18  | C <sub>27</sub> H <sub>19</sub> ClN <sub>4</sub> O <sub>3</sub> S | (M+Na)+ |
| 540.0759 | 540.0762 | 0.64      | 1 | 533.48   | C <sub>27</sub> H <sub>19</sub> ClN <sub>4</sub> O <sub>3</sub> S | (M+Na)+ |

4.34 Compound 31c

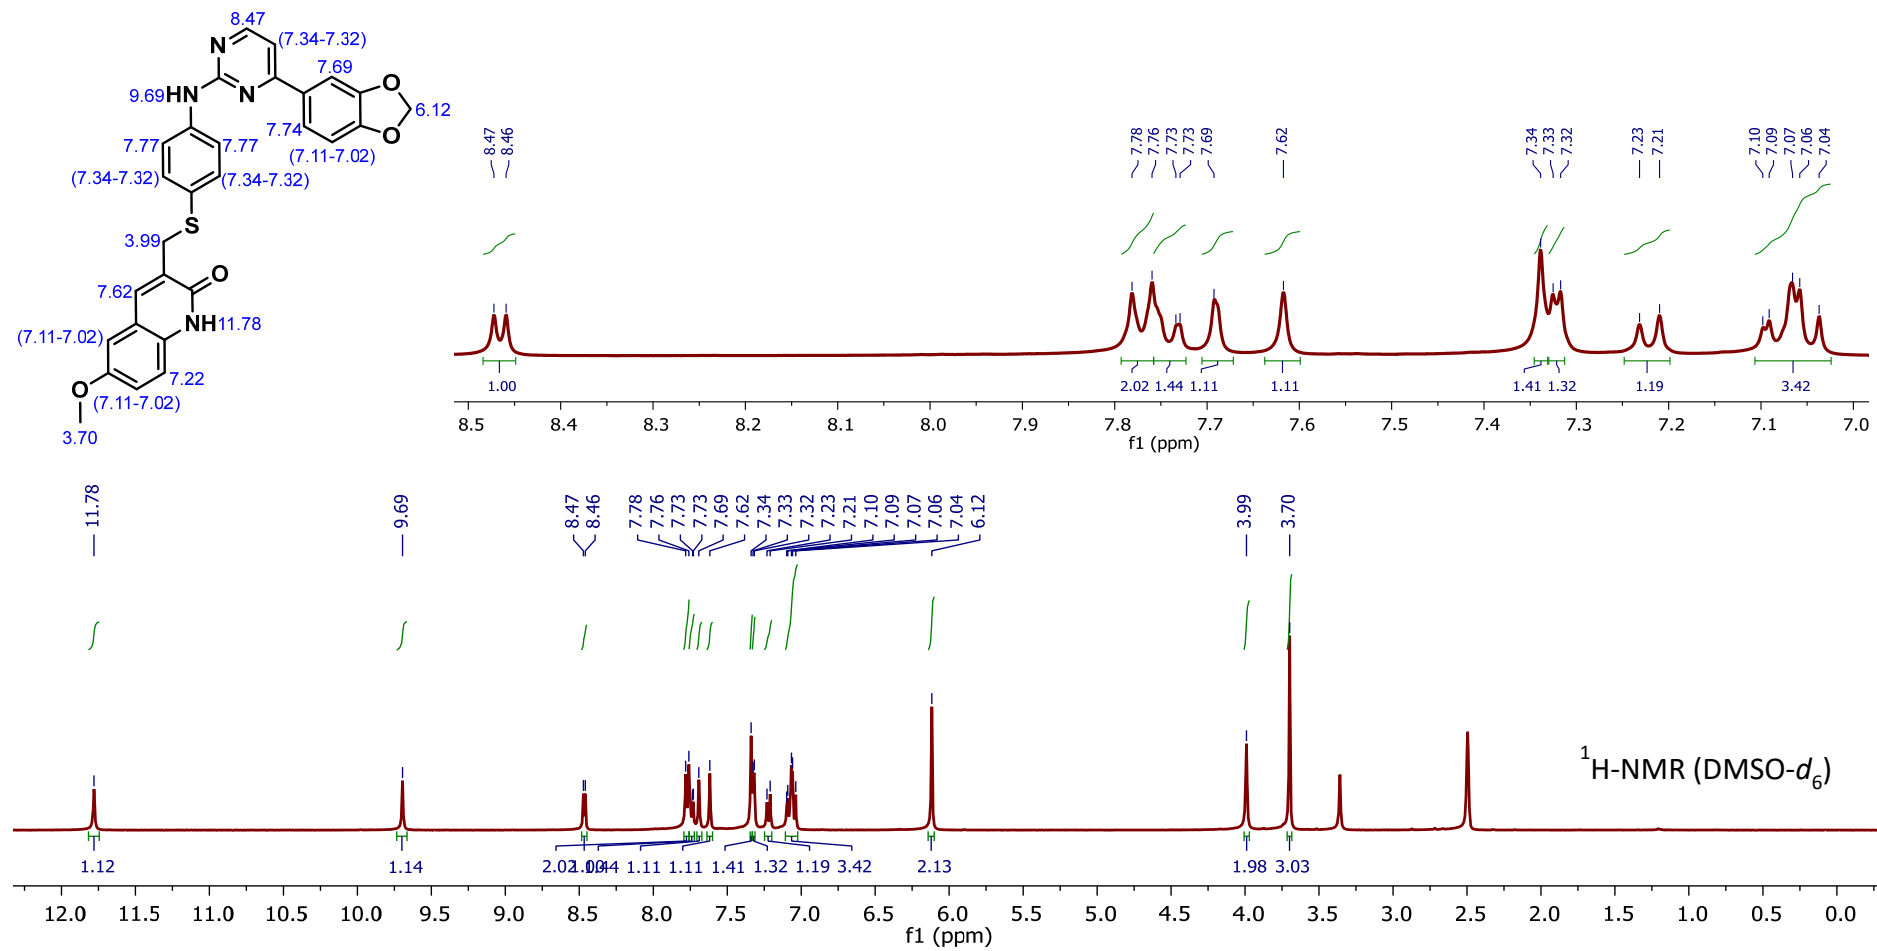

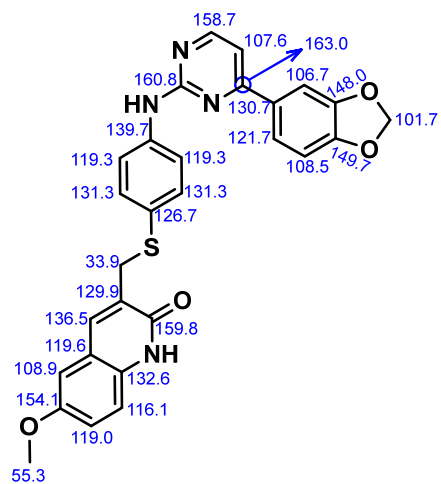

DEPT-135 ( $\text{DMSO}-d_6$ )

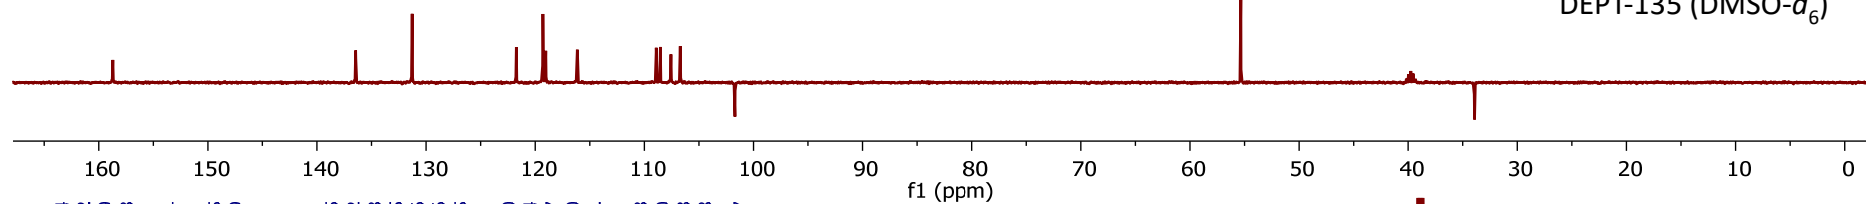

$^{13}\text{C}$ -NMR ( $\text{DMSO}-d_6$ )

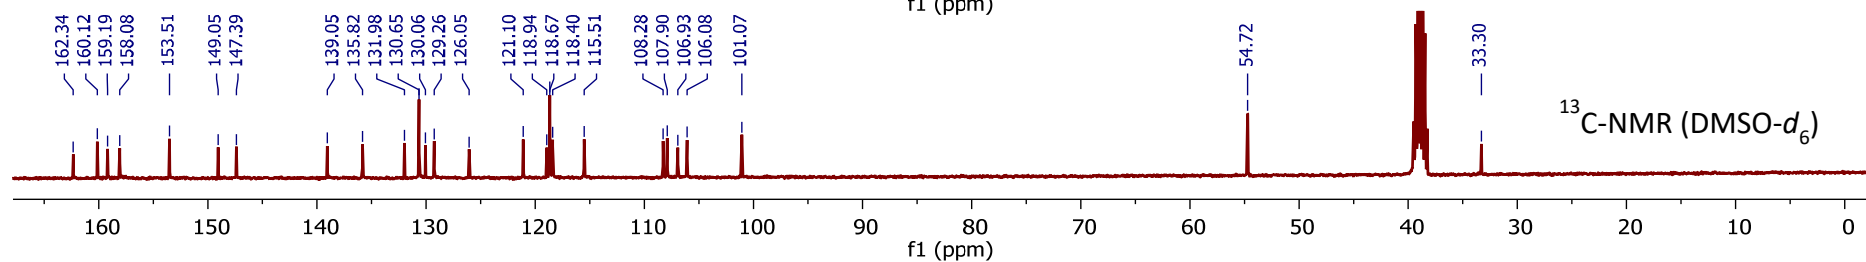

## EI MS (70eV)

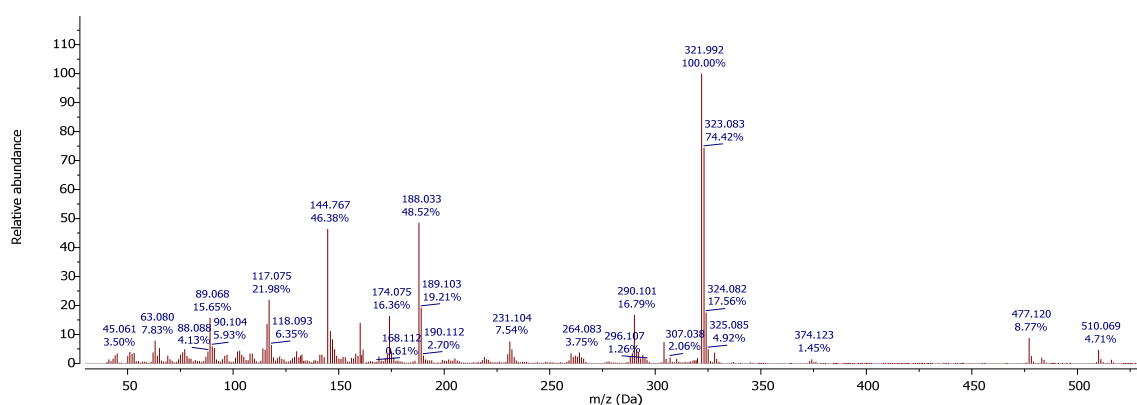

## ESI-QTOF (positive ionization)

MS Zoomed Spectrum

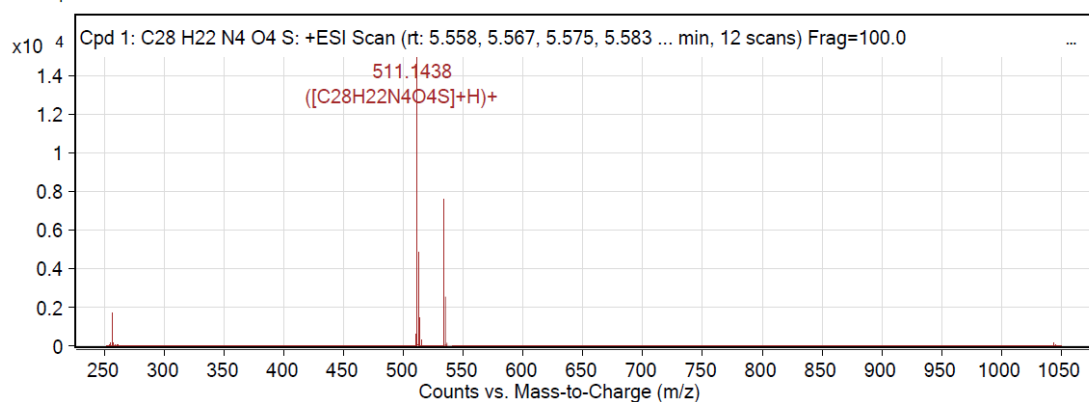

### MS Spectrum Peak List

| m/z       | Calc m/z  | Diff(ppm) | z | Abund    | Formula     | Ion      |
|-----------|-----------|-----------|---|----------|-------------|----------|
| 256.0746  | 256.0754  | 2.93      | 2 | 1763.84  | C28H22N4O4S | (M+2H)+2 |
| 256.5772  | 256.5769  | -1.17     | 2 | 685.52   | C28H22N4O4S | (M+2H)+2 |
| 257.0777  | 257.0761  | -6.04     | 2 | 183.36   | C28H22N4O4S | (M+2H)+2 |
| 511.1438  | 511.1435  | -0.71     | 1 | 14971.63 | C28H22N4O4S | (M+H)+   |
| 512.1462  | 512.1465  | 0.55      | 1 | 4953.16  | C28H22N4O4S | (M+H)+   |
| 513.1455  | 513.145   | -0.93     | 1 | 1537.28  | C28H22N4O4S | (M+H)+   |
| 533.1252  | 533.1254  | 0.42      | 1 | 7665.06  | C28H22N4O4S | (M+Na)+  |
| 534.1284  | 534.1284  | 0.01      | 1 | 2610.76  | C28H22N4O4S | (M+Na)+  |
| 535.1272  | 535.1269  | -0.46     | 1 | 736.35   | C28H22N4O4S | (M+Na)+  |
| 1043.2579 | 1043.2616 | 3.53      | 1 | 83.51    | C28H22N4O4S | (2M+Na)+ |

4.35 Compound 32a

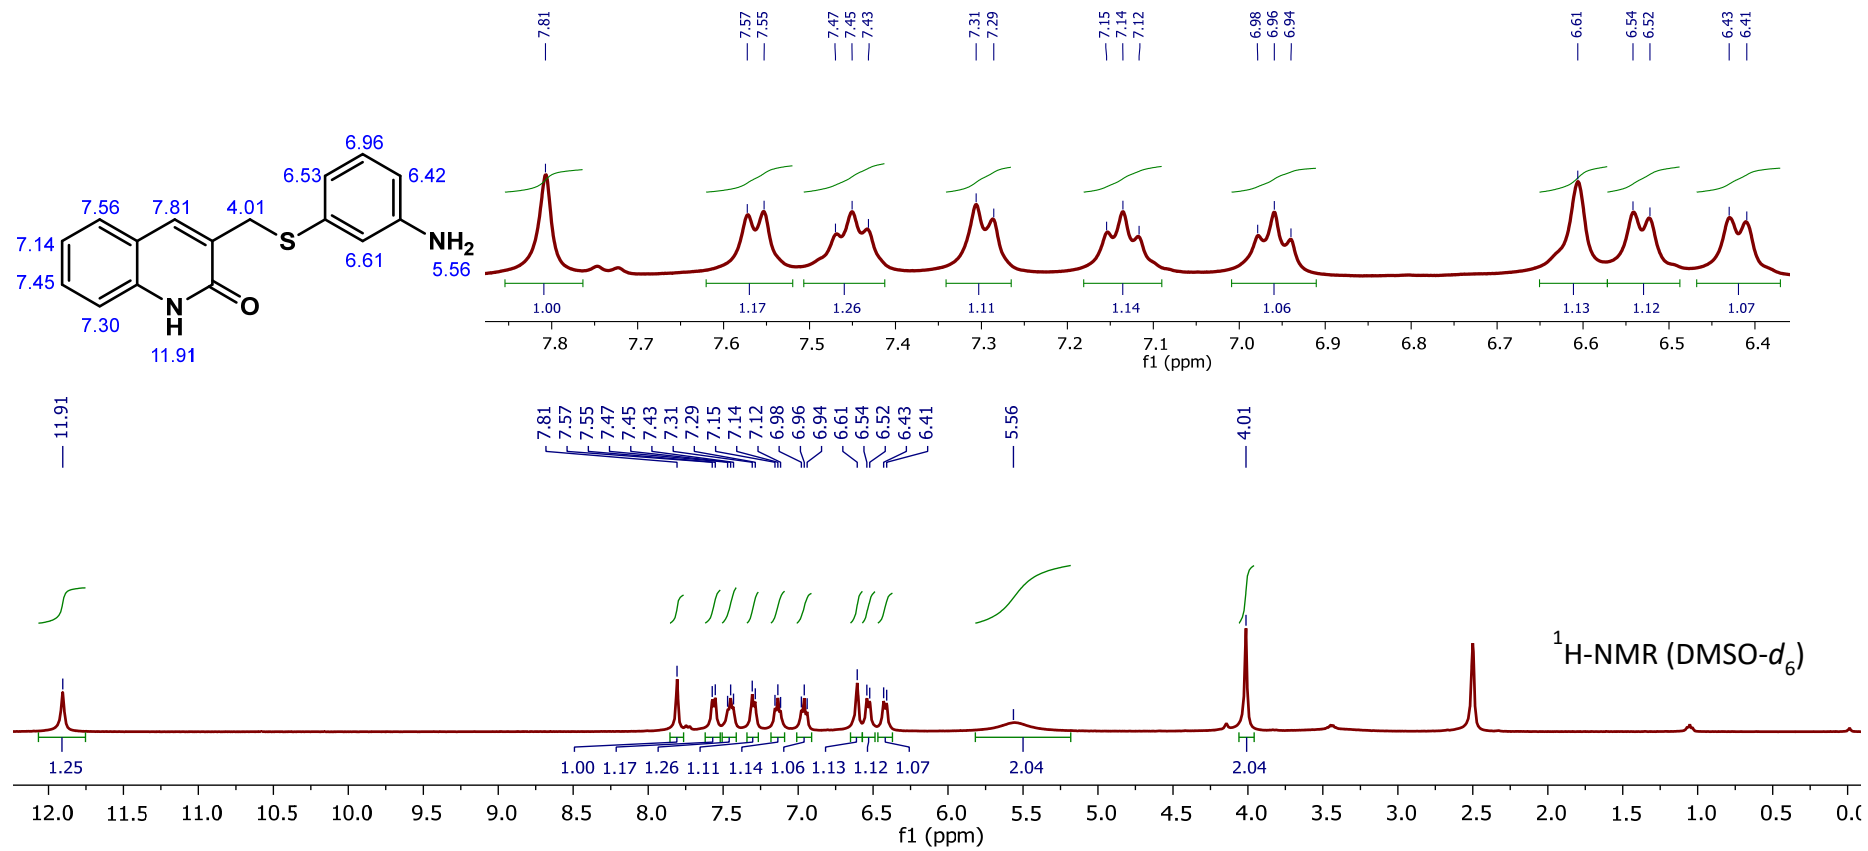



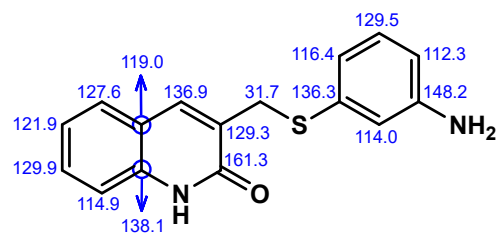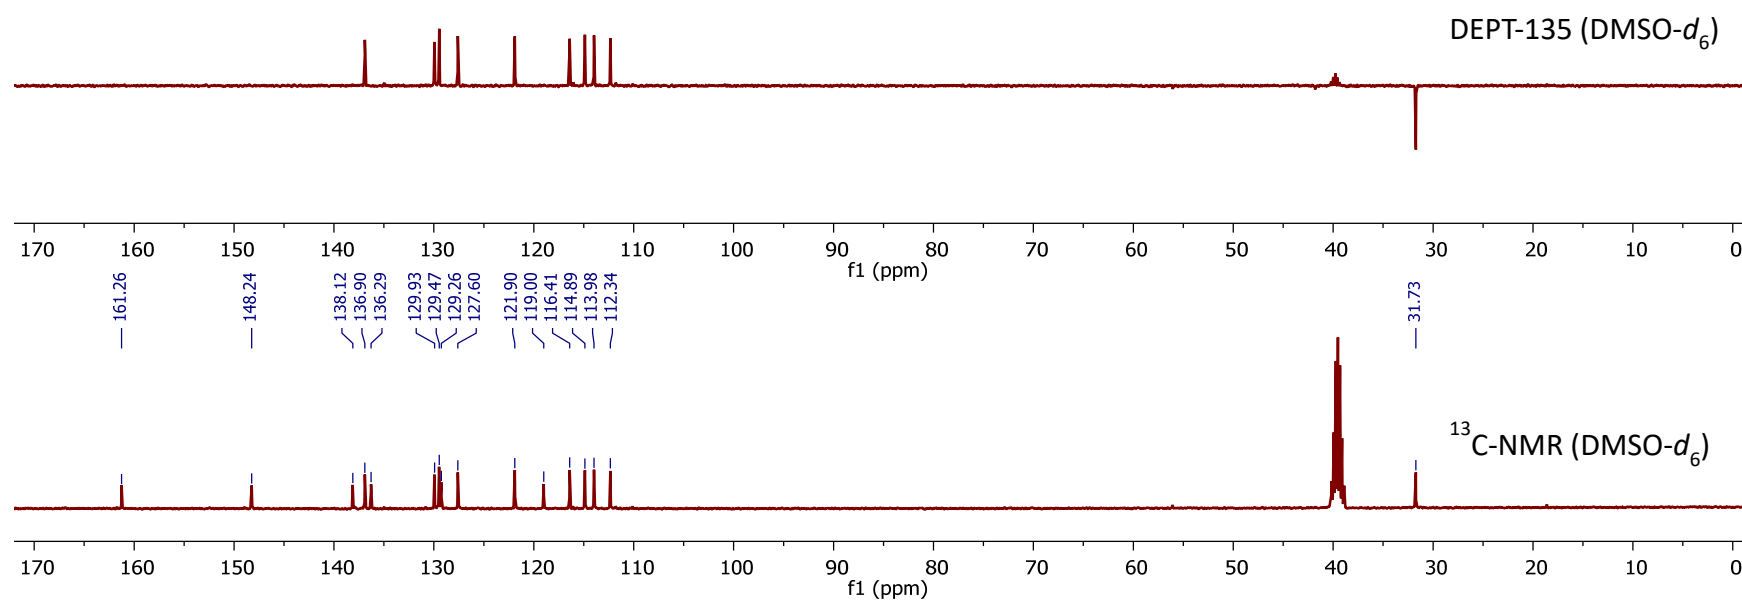

## EI MS (70eV)

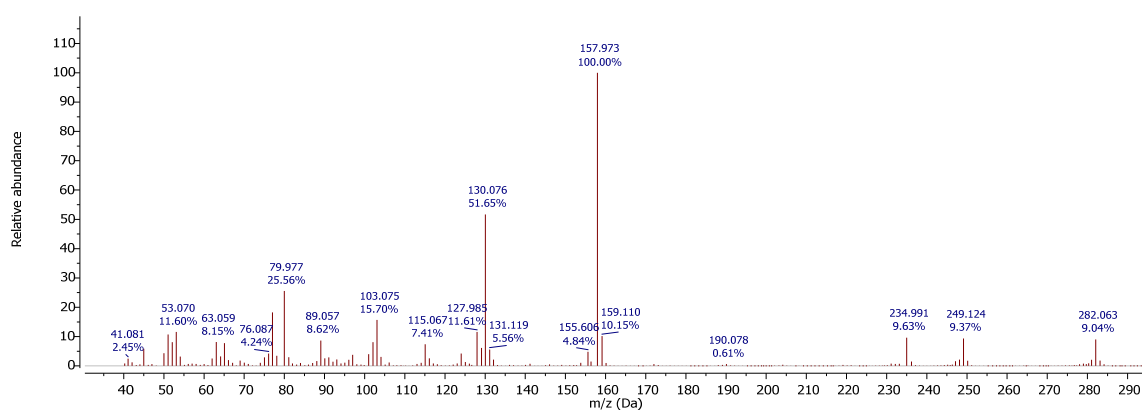

## ESI-QTOF (positive ionization)

MS Zoomed Spectrum

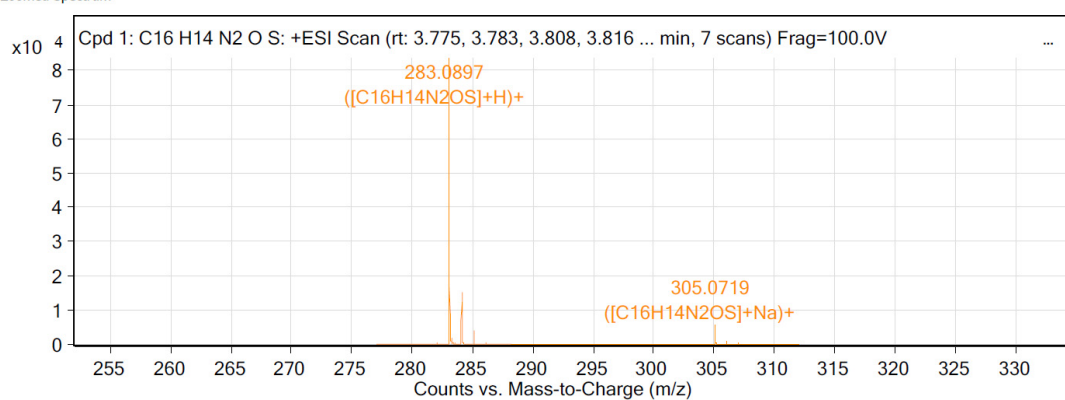

## MS Spectrum Peak List

| m/z      | Calc m/z | Diff(ppm) | z | Abund    | Formula    | Ion     |
|----------|----------|-----------|---|----------|------------|---------|
| 282.0827 | 282.0821 | -1.93     | 1 | 538.14   | C16H14N2OS | M+      |
| 283.0897 | 283.09   | 0.8       | 1 | 84261.67 | C16H14N2OS | (M+H)+  |
| 284.0929 | 284.0929 | 0.02      | 1 | 15045.32 | C16H14N2OS | (M+H)+  |
| 285.0885 | 285.0887 | 0.89      | 1 | 4221.72  | C16H14N2OS | (M+H)+  |
| 305.0719 | 305.0719 | 0.16      | 1 | 5652.01  | C16H14N2OS | (M+Na)+ |
| 306.0753 | 306.0749 | -1.28     | 1 | 1184.37  | C16H14N2OS | (M+Na)+ |
| 307.0701 | 307.0707 | 1.83      | 1 | 367.66   | C16H14N2OS | (M+Na)+ |

4.36 Compound 32b

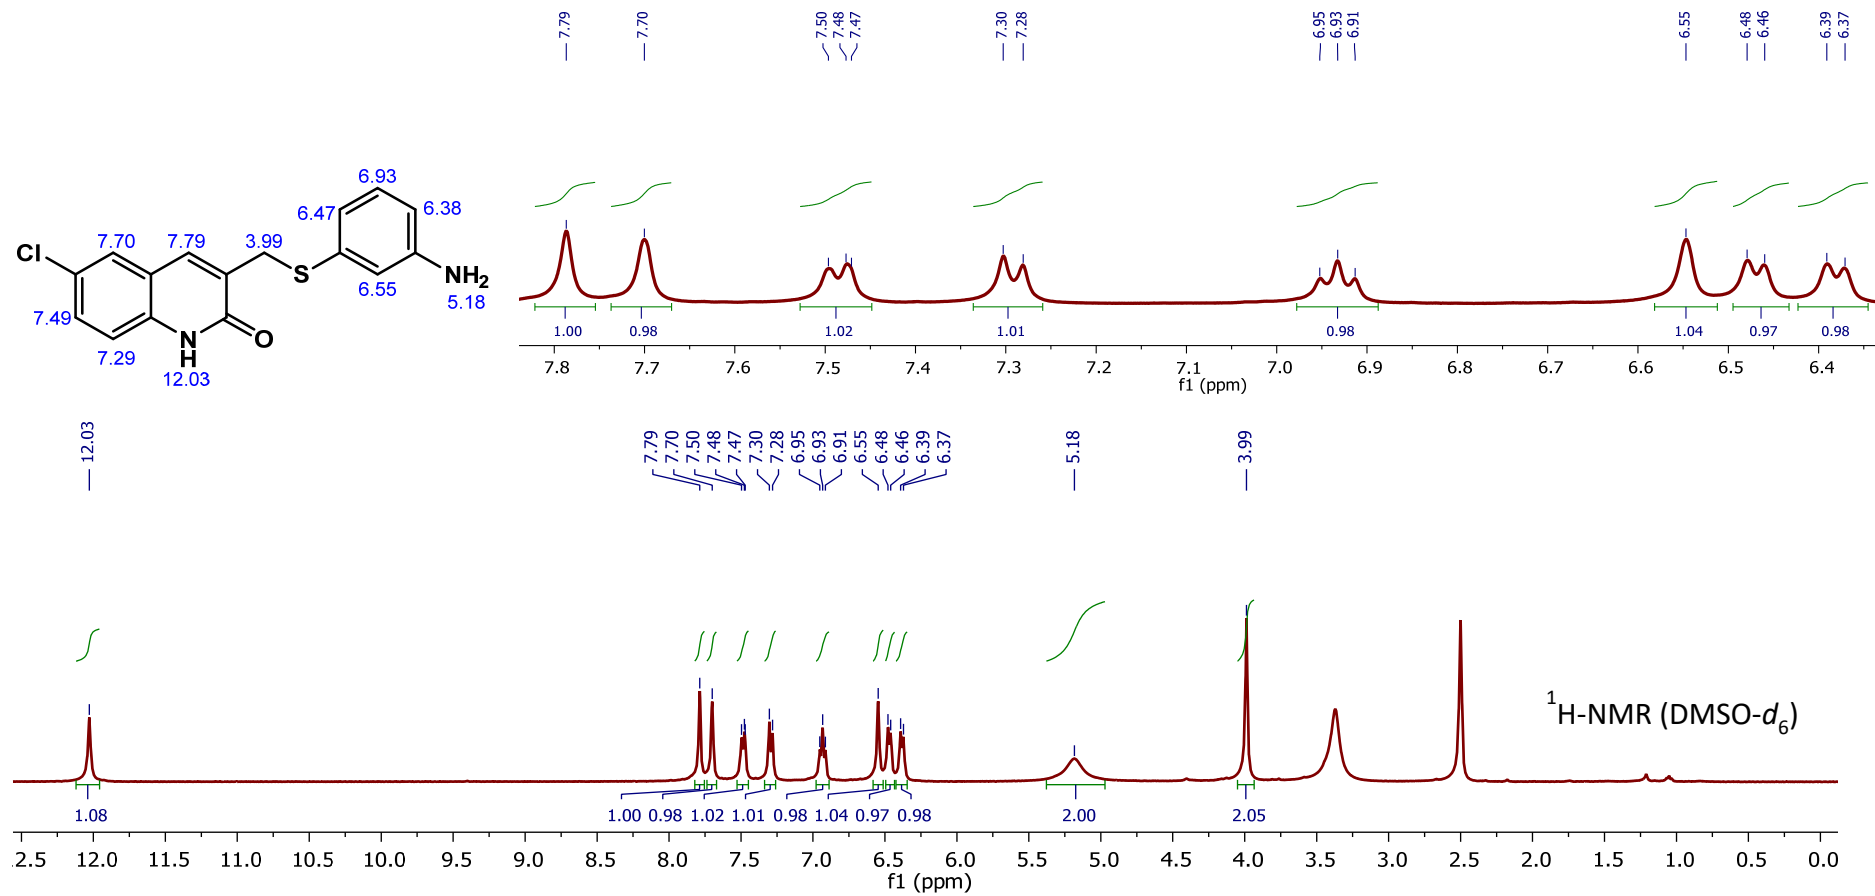

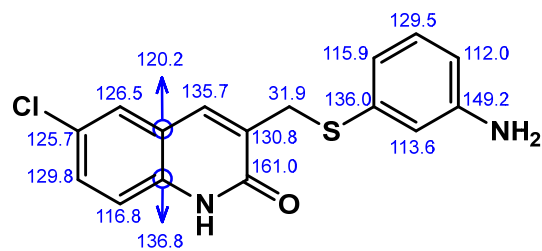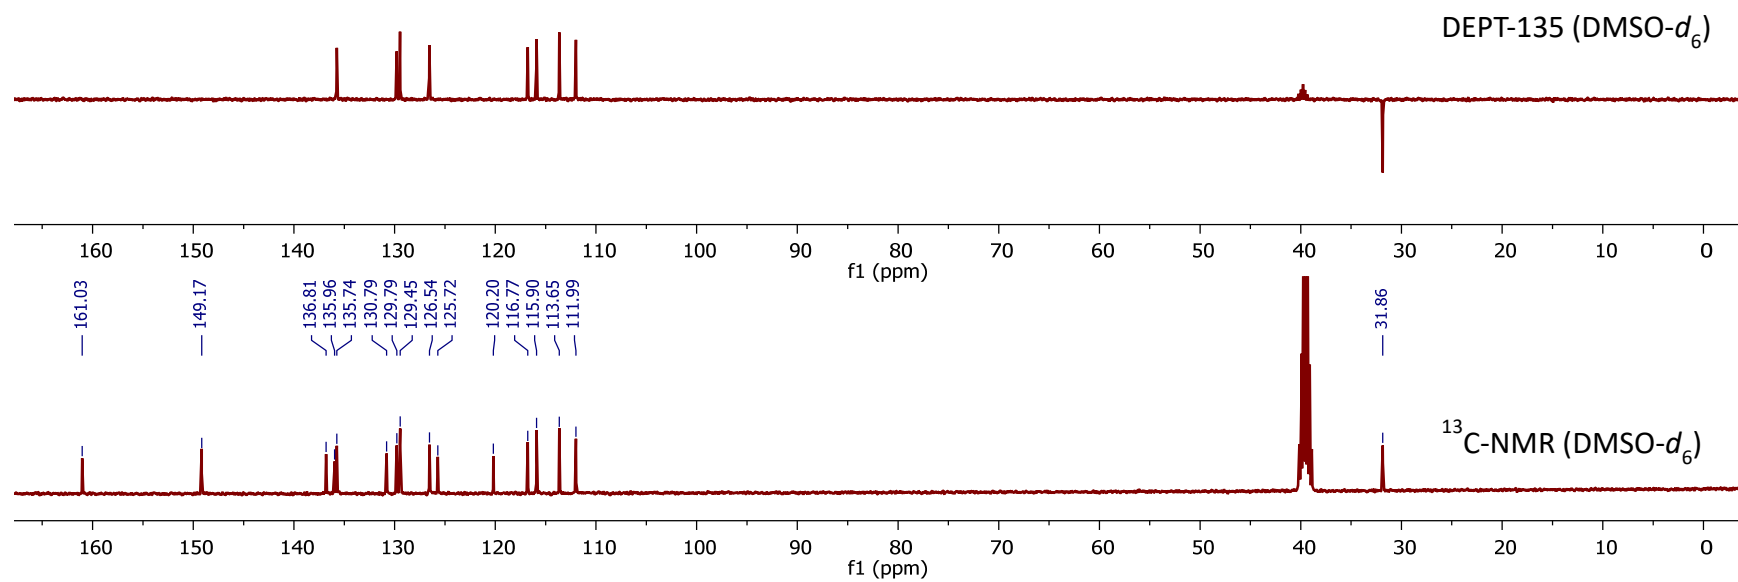

## EI MS (70eV)

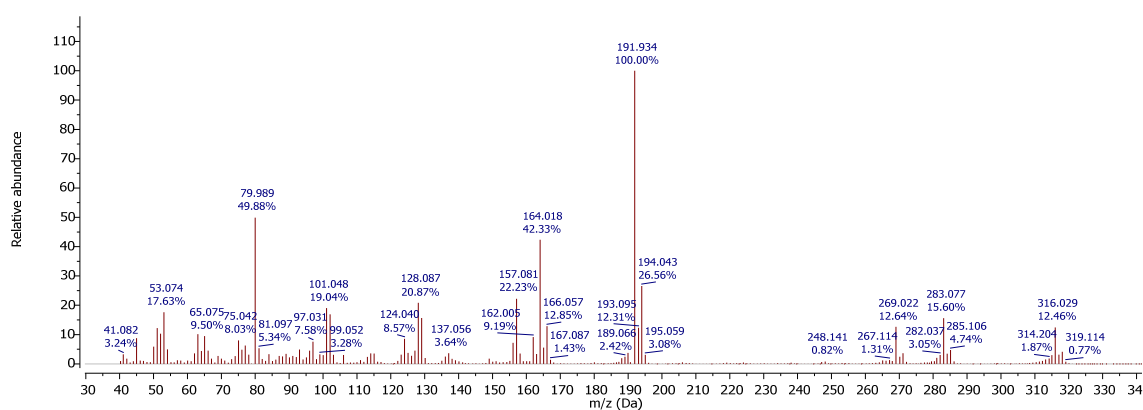

## ESI-QTOF (positive ionization)

MS Zoomed Spectrum

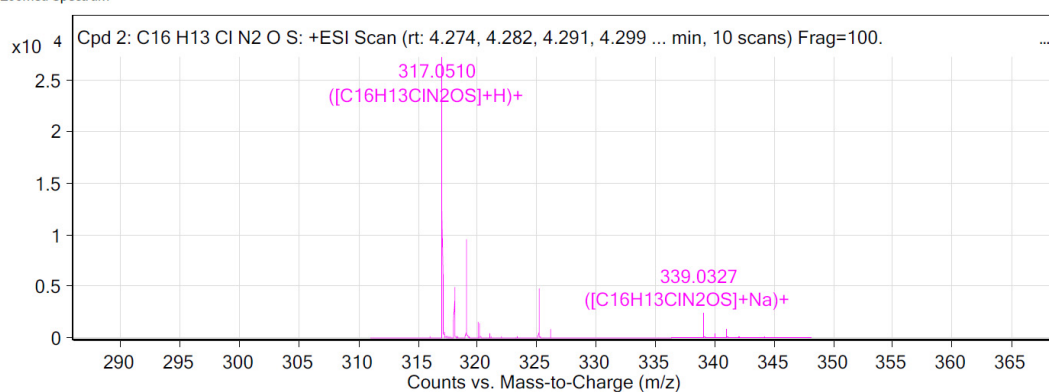

## MS Spectrum Peak List

| m/z      | Calc m/z | Diff(ppm) | z | Abund    | Formula                                             | Ion                 |
|----------|----------|-----------|---|----------|-----------------------------------------------------|---------------------|
| 316.045  | 316.0432 | -5.68     | 1 | 103.78   | C <sub>16</sub> H <sub>13</sub> ClN <sub>2</sub> OS | M+                  |
| 317.051  | 317.051  | 0         | 1 | 27328.75 | C <sub>16</sub> H <sub>13</sub> ClN <sub>2</sub> OS | (M+H) <sup>+</sup>  |
| 318.0537 | 318.054  | 0.83      | 1 | 5062.02  | C <sub>16</sub> H <sub>13</sub> ClN <sub>2</sub> OS | (M+H) <sup>+</sup>  |
| 319.0482 | 319.0483 | 0.49      | 1 | 9851.85  | C <sub>16</sub> H <sub>13</sub> ClN <sub>2</sub> OS | (M+H) <sup>+</sup>  |
| 320.0515 | 320.051  | -1.44     | 1 | 1715.77  | C <sub>16</sub> H <sub>13</sub> ClN <sub>2</sub> OS | (M+H) <sup>+</sup>  |
| 321.0484 | 321.0471 | -4.17     | 1 | 507.61   | C <sub>16</sub> H <sub>13</sub> ClN <sub>2</sub> OS | (M+H) <sup>+</sup>  |
| 339.0327 | 339.0329 | 0.79      | 1 | 2483.84  | C <sub>16</sub> H <sub>13</sub> ClN <sub>2</sub> OS | (M+Na) <sup>+</sup> |
| 340.0363 | 340.0368 | 1.46      | 1 | 401.33   | C <sub>16</sub> H <sub>13</sub> ClN <sub>2</sub> OS | (M+Na) <sup>+</sup> |
| 341.03   | 341.0303 | 0.81      | 1 | 915.04   | C <sub>16</sub> H <sub>13</sub> ClN <sub>2</sub> OS | (M+Na) <sup>+</sup> |
| 342.0322 | 342.033  | 2.33      | 1 | 175.25   | C <sub>16</sub> H <sub>13</sub> ClN <sub>2</sub> OS | (M+Na) <sup>+</sup> |

4.37 Compound 32c

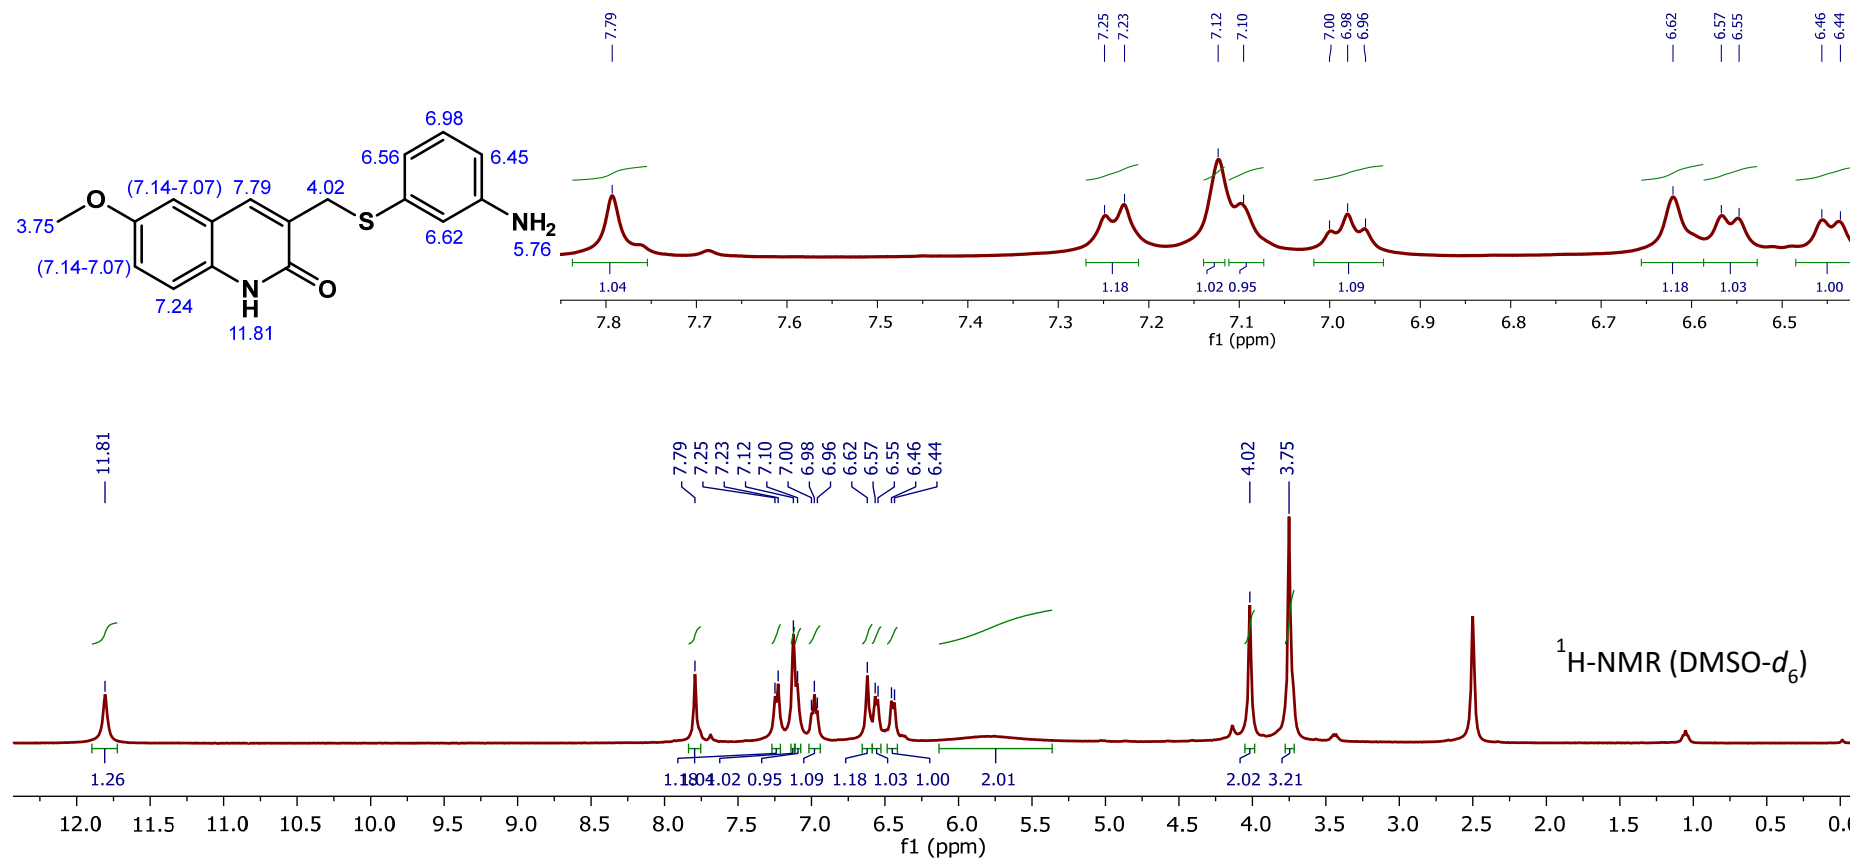

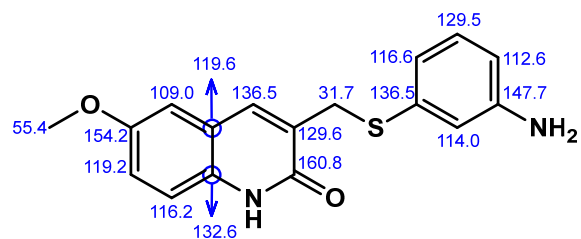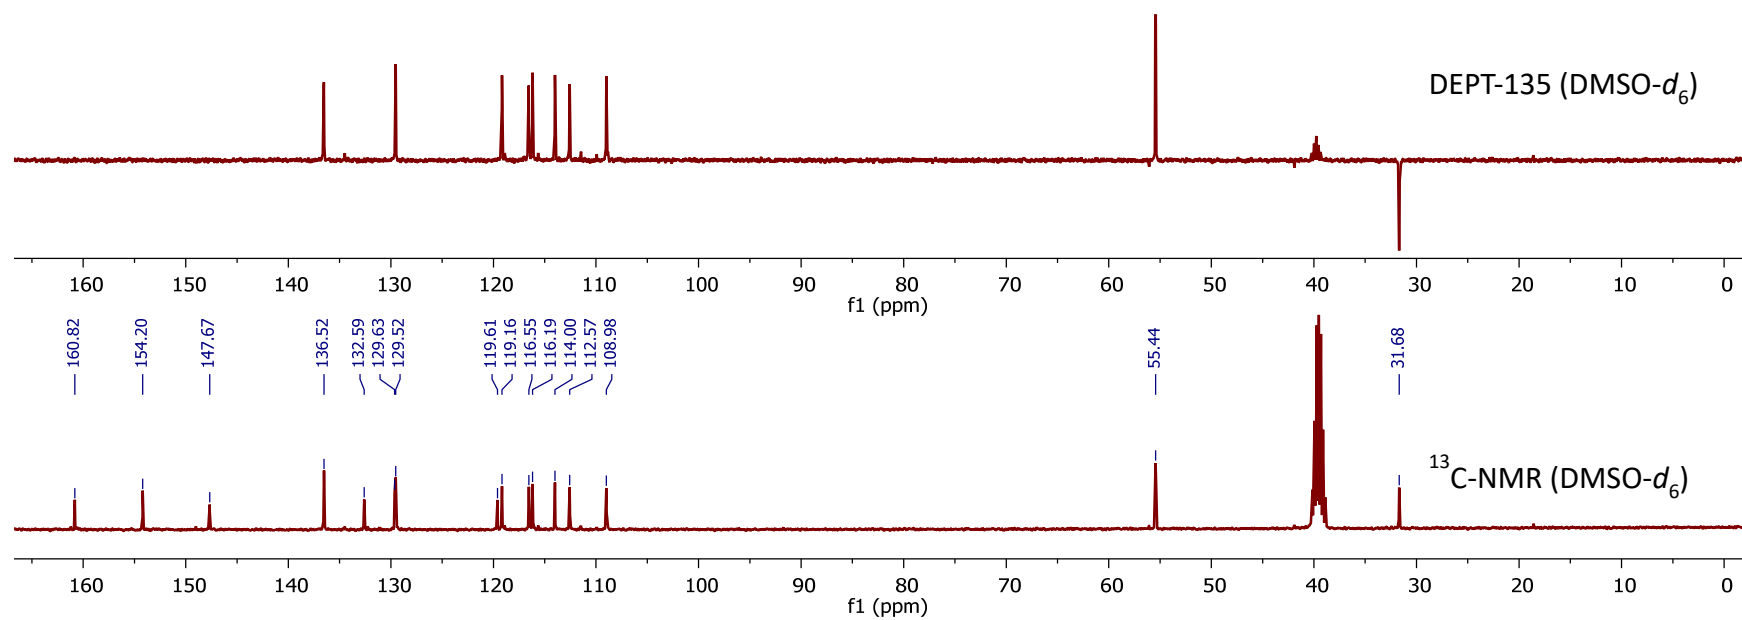

EI MS (70eV)

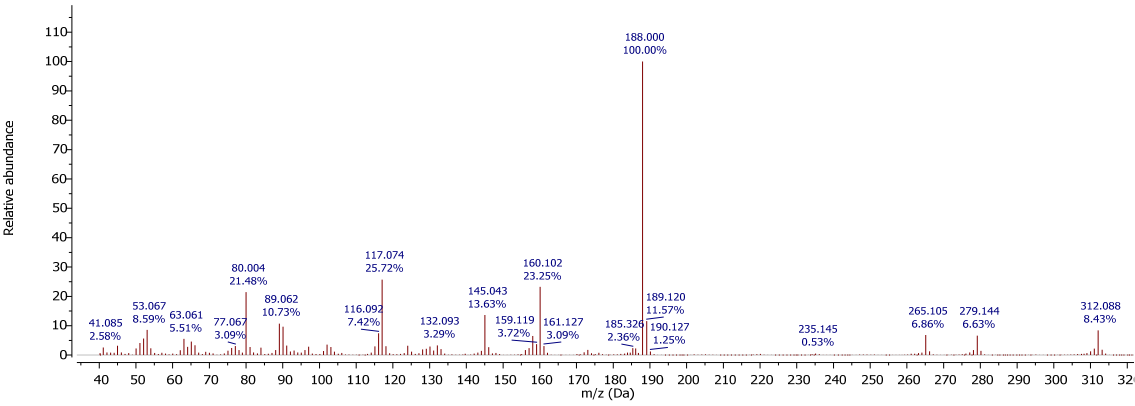

ESI-QTOF (positive ionization)

MS Zoomed Spectrum

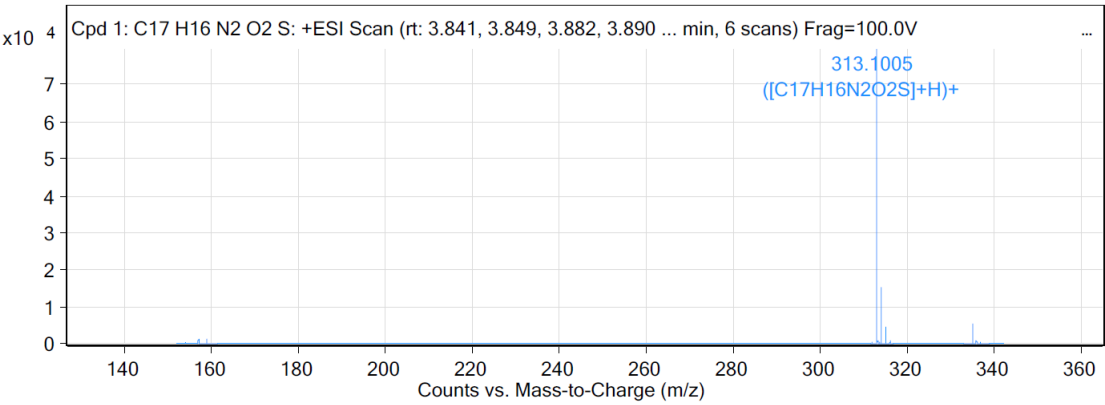

MS Spectrum Peak List

| m/z      | Calc m/z | Diff(ppm) | z | Abund    | Formula     | Ion      |
|----------|----------|-----------|---|----------|-------------|----------|
| 157.0534 | 157.0539 | 3.1       | 2 | 1327.52  | C17H16N2O2S | (M+2H)+2 |
| 157.5539 | 157.5554 | 9.41      | 2 | 217.53   | C17H16N2O2S | (M+2H)+2 |
| 158.057  | 158.0535 | -22.44    | 2 | 103.37   | C17H16N2O2S | (M+2H)+2 |
| 312.0924 | 312.0927 | 0.81      | 1 | 601.84   | C17H16N2O2S | M+       |
| 313.1005 | 313.1005 | -0.04     | 1 | 81732.62 | C17H16N2O2S | (M+H)+   |
| 314.1036 | 314.1035 | -0.32     | 1 | 15167.51 | C17H16N2O2S | (M+H)+   |
| 315.0996 | 315.0997 | 0.27      | 1 | 4440.54  | C17H16N2O2S | (M+H)+   |
| 335.0826 | 335.0825 | -0.42     | 1 | 5570.1   | C17H16N2O2S | (M+Na)+  |
| 337.081  | 337.0817 | 2.09      | 1 | 358.39   | C17H16N2O2S | (M+Na)+  |



4.38 Compound 35a

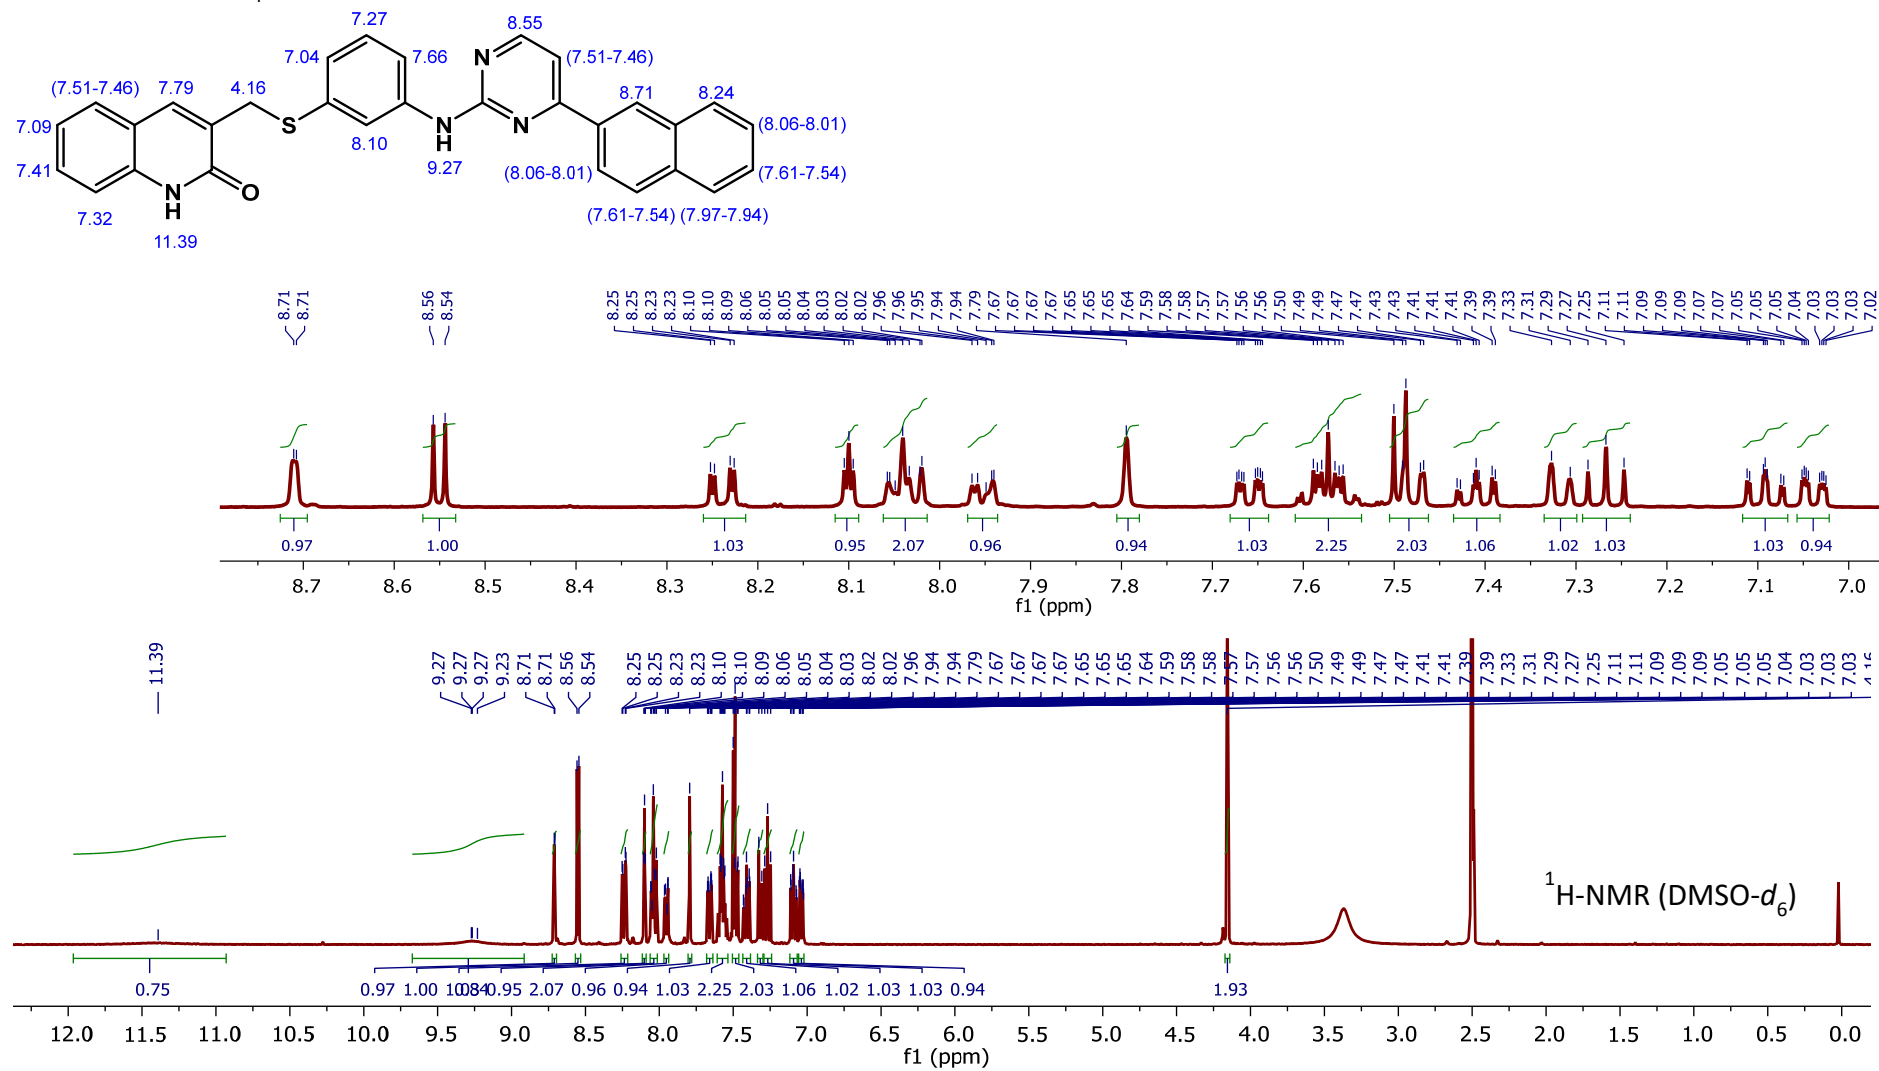

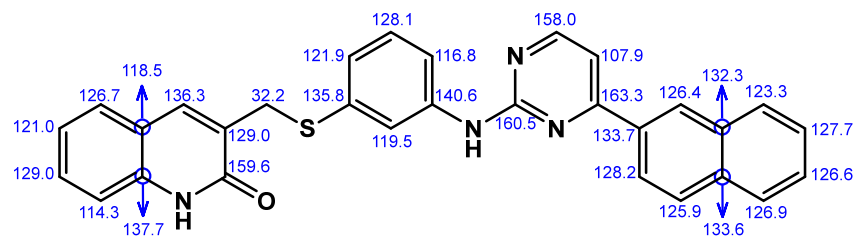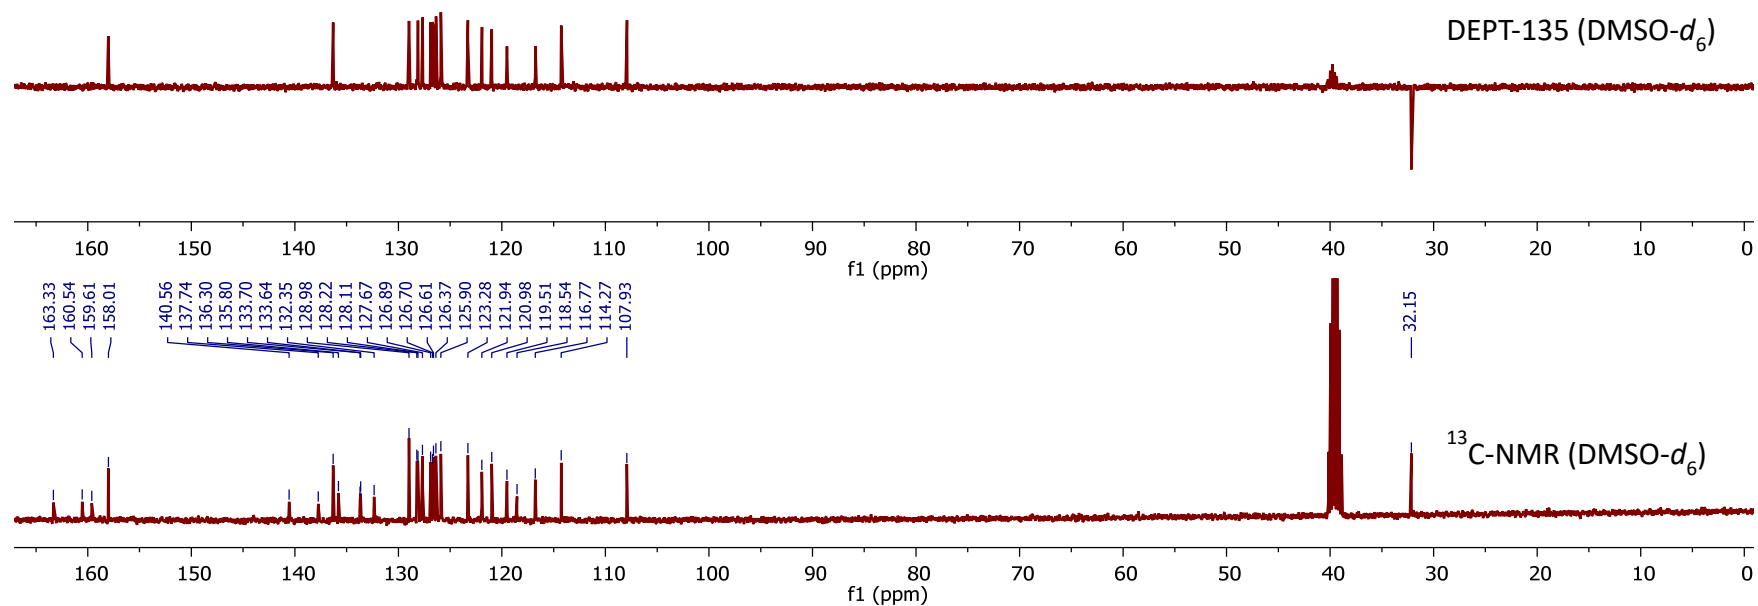

## EI MS (70eV)

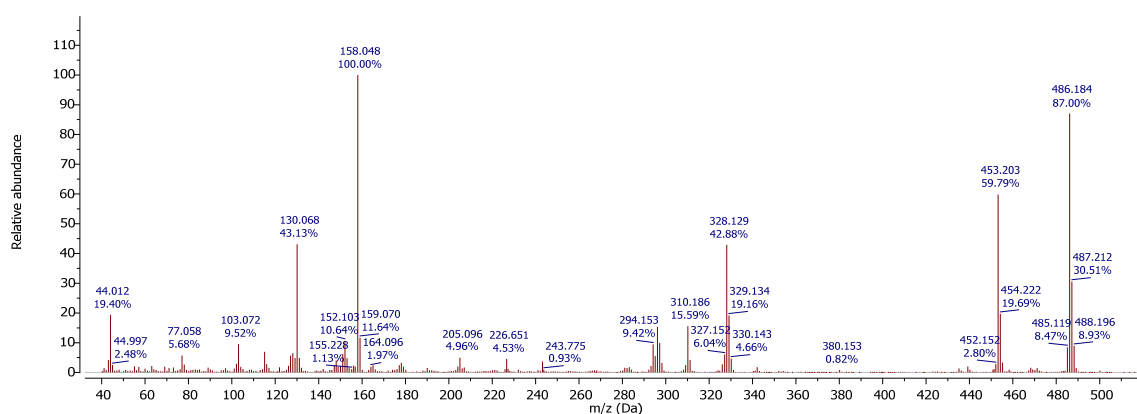

## ESI-QTOF (positive ionization)

MS Zoomed Spectrum

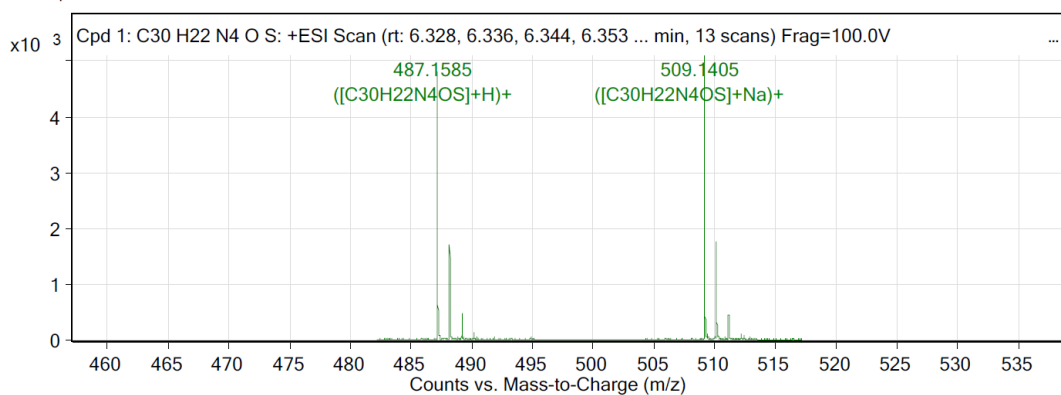

## MS Spectrum Peak List

| m/z      | Calc m/z | Diff(ppm) | z | Abund   | Formula                                                       | Ion                 |
|----------|----------|-----------|---|---------|---------------------------------------------------------------|---------------------|
| 487.1585 | 487.1587 | 0.48      | 1 | 4914.18 | C <sub>30</sub> H <sub>22</sub> N <sub>4</sub> O <sub>5</sub> | (M+H) <sup>+</sup>  |
| 488.1618 | 488.1617 | -0.13     | 1 | 1750.32 | C <sub>30</sub> H <sub>22</sub> N <sub>4</sub> O <sub>5</sub> | (M+H) <sup>+</sup>  |
| 489.1595 | 489.1604 | 1.83      | 1 | 516.34  | C <sub>30</sub> H <sub>22</sub> N <sub>4</sub> O <sub>5</sub> | (M+H) <sup>+</sup>  |
| 490.1622 | 490.1608 | -2.83     | 1 | 78.4    | C <sub>30</sub> H <sub>22</sub> N <sub>4</sub> O <sub>5</sub> | (M+H) <sup>+</sup>  |
| 509.1405 | 509.1407 | 0.35      | 1 | 5170.75 | C <sub>30</sub> H <sub>22</sub> N <sub>4</sub> O <sub>5</sub> | (M+Na) <sup>+</sup> |
| 510.1434 | 510.1437 | 0.59      | 1 | 1867.81 | C <sub>30</sub> H <sub>22</sub> N <sub>4</sub> O <sub>5</sub> | (M+Na) <sup>+</sup> |
| 511.1418 | 511.1423 | 1.13      | 1 | 513.31  | C <sub>30</sub> H <sub>22</sub> N <sub>4</sub> O <sub>5</sub> | (M+Na) <sup>+</sup> |
| 512.1422 | 512.1428 | 1         | 1 | 82.34   | C <sub>30</sub> H <sub>22</sub> N <sub>4</sub> O <sub>5</sub> | (M+Na) <sup>+</sup> |

4.39

Compound 35b

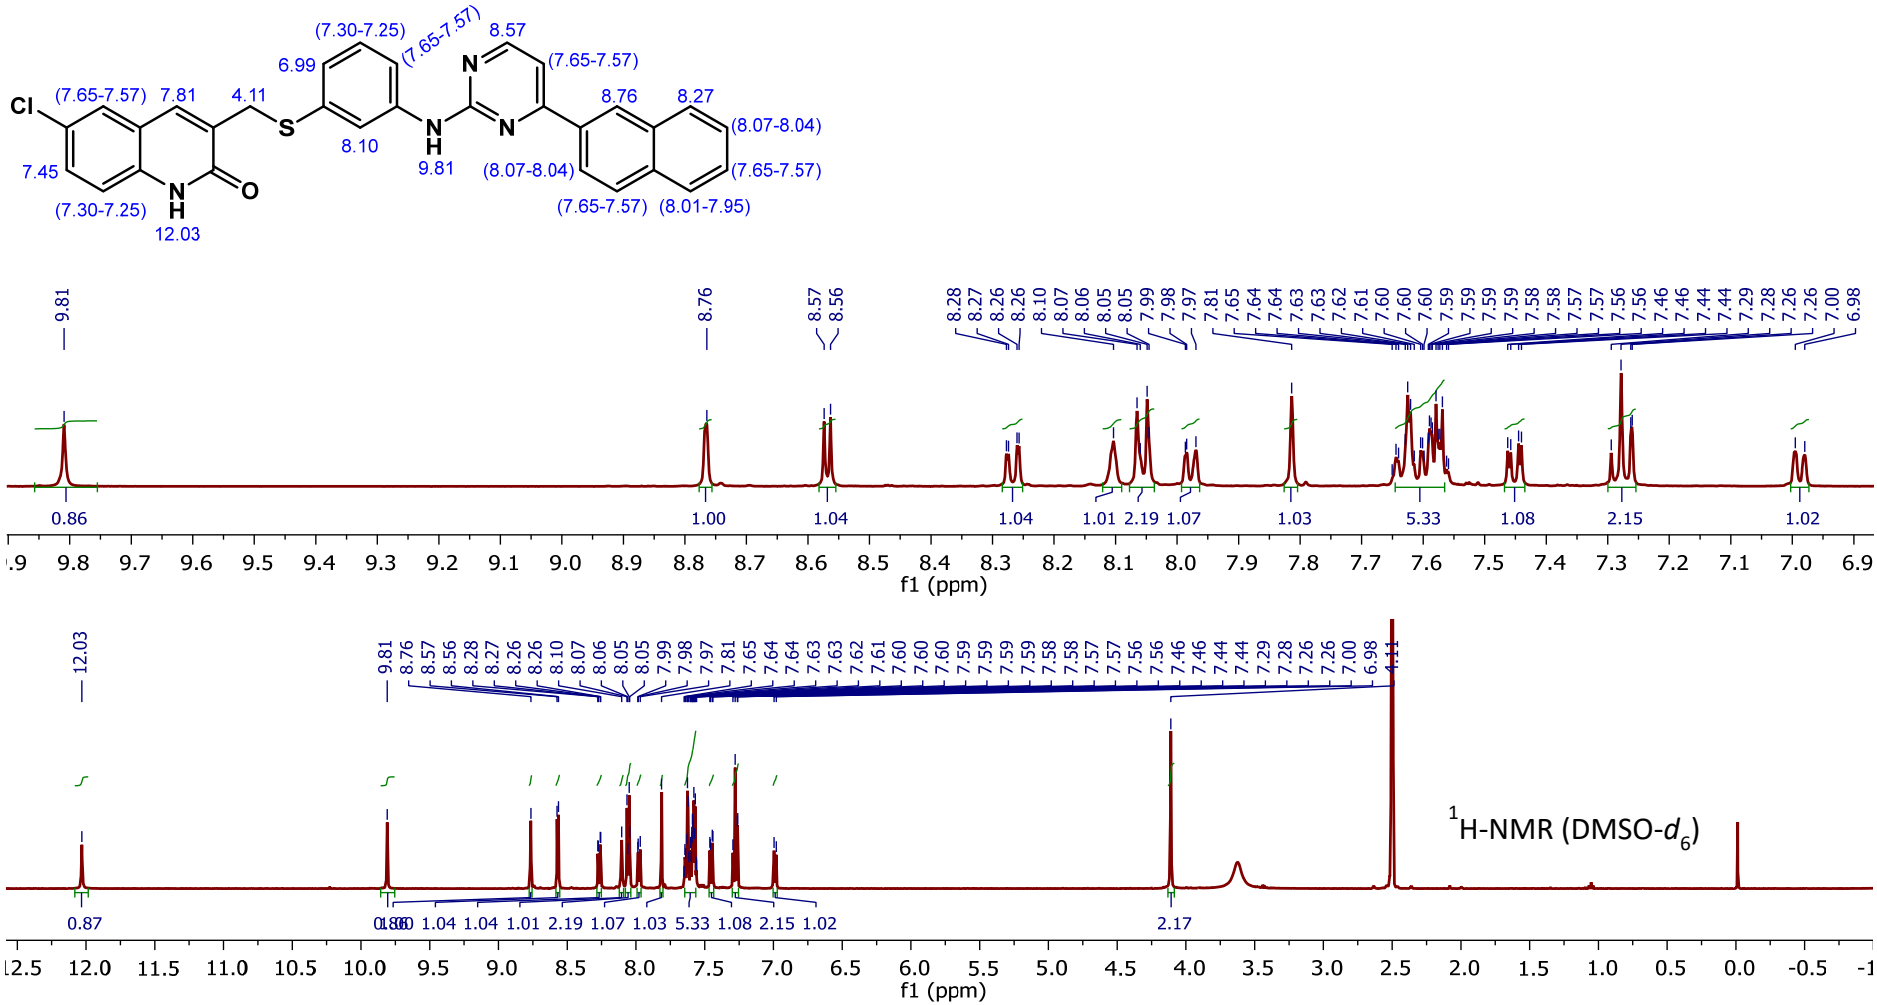

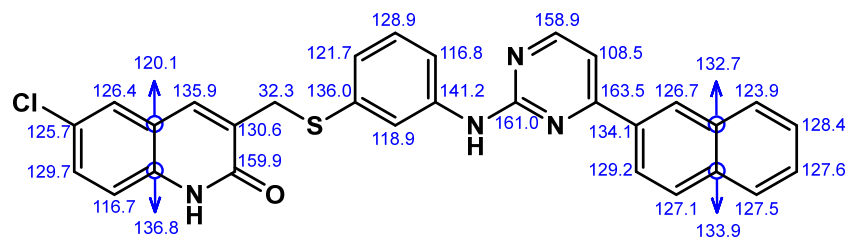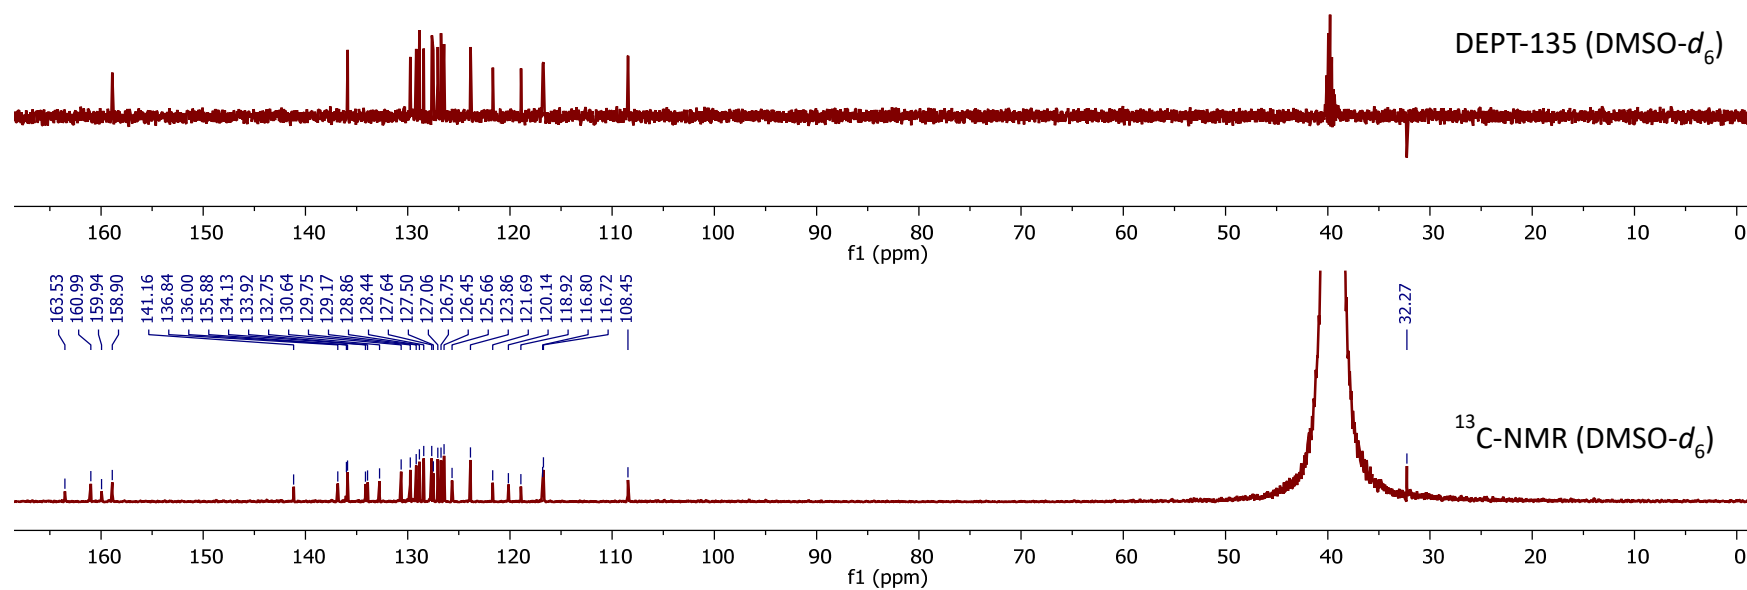

## EI MS (70eV)

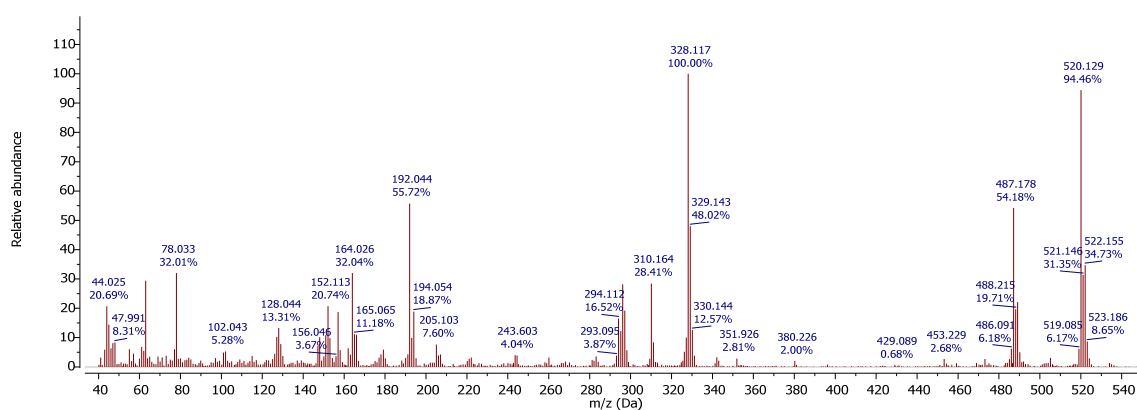

## ESI-QTOF (positive ionization)

MS Zoomed Spectrum

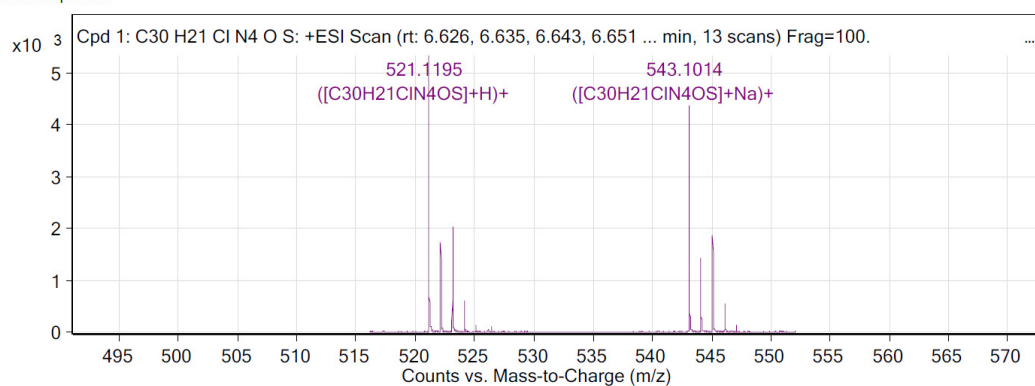

### MS Spectrum Peak List

| m/z      | Calc m/z | Diff(ppm) | z | Abund   | Formula                                             | Ion     |
|----------|----------|-----------|---|---------|-----------------------------------------------------|---------|
| 521.1195 | 521.1197 | 0.48      | 1 | 5458.62 | C <sub>30</sub> H <sub>21</sub> ClN <sub>4</sub> OS | (M+H)+  |
| 522.1225 | 522.1228 | 0.56      | 1 | 1815.21 | C <sub>30</sub> H <sub>21</sub> ClN <sub>4</sub> OS | (M+H)+  |
| 523.117  | 523.1179 | 1.75      | 1 | 2090.69 | C <sub>30</sub> H <sub>21</sub> ClN <sub>4</sub> OS | (M+H)+  |
| 524.1203 | 524.1201 | -0.34     | 1 | 619.73  | C <sub>30</sub> H <sub>21</sub> ClN <sub>4</sub> OS | (M+H)+  |
| 525.1183 | 525.1189 | 1.13      | 1 | 126.98  | C <sub>30</sub> H <sub>21</sub> ClN <sub>4</sub> OS | (M+H)+  |
| 543.1014 | 543.1017 | 0.45      | 1 | 4458.7  | C <sub>30</sub> H <sub>21</sub> ClN <sub>4</sub> OS | (M+Na)+ |
| 544.1047 | 544.1047 | 0.02      | 1 | 1534.79 | C <sub>30</sub> H <sub>21</sub> ClN <sub>4</sub> OS | (M+Na)+ |
| 545.1003 | 545.0999 | -0.83     | 1 | 1950.36 | C <sub>30</sub> H <sub>21</sub> ClN <sub>4</sub> OS | (M+Na)+ |
| 546.1009 | 546.1021 | 2.20      | 1 | 372.63  | C <sub>30</sub> H <sub>21</sub> ClN <sub>4</sub> OS | (M+Na)+ |
| 547.1014 | 547.1009 | -0.92     | 1 | 126.62  | C <sub>30</sub> H <sub>21</sub> ClN <sub>4</sub> OS | (M+Na)+ |

4.40 Compound 35c

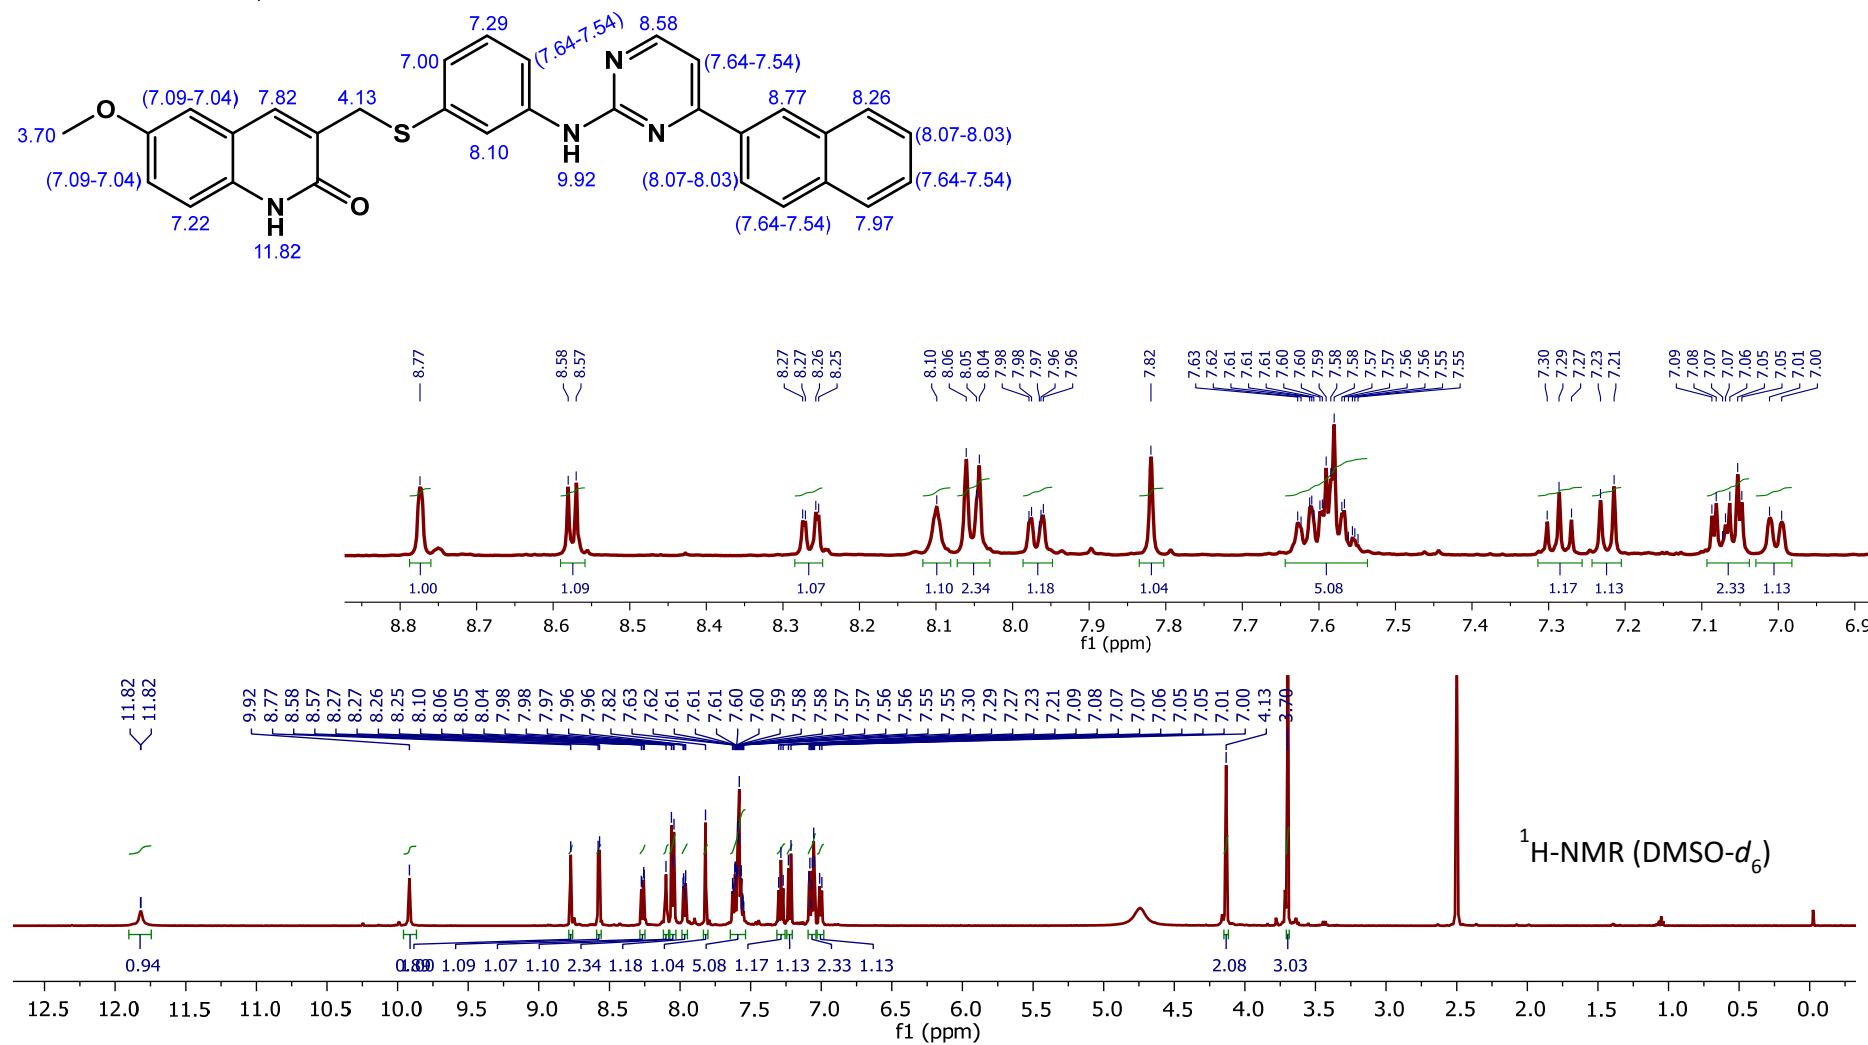

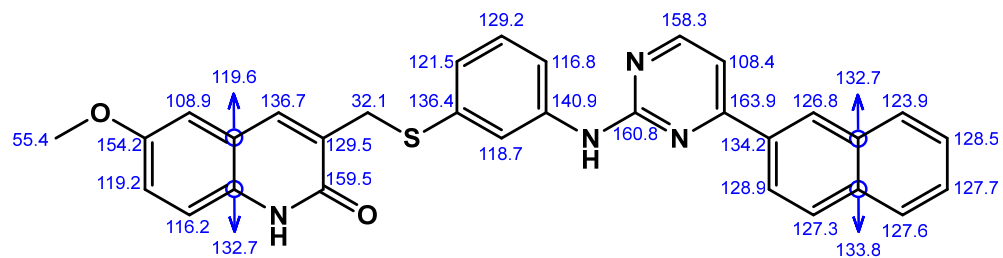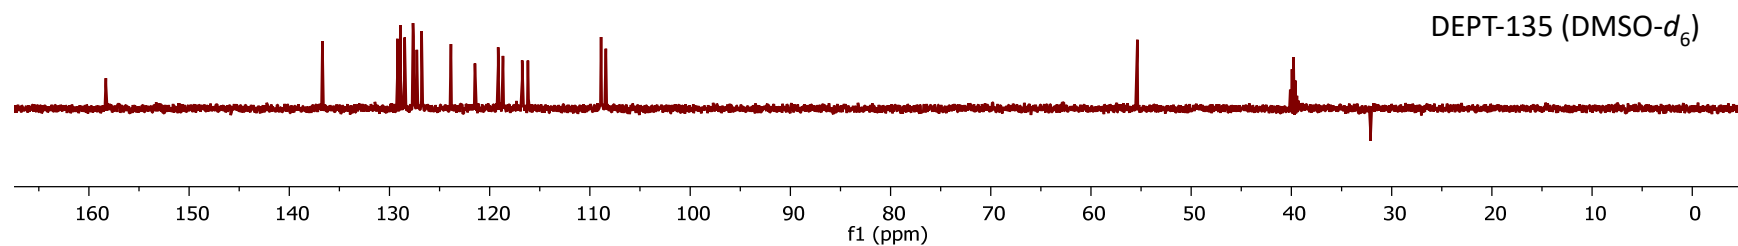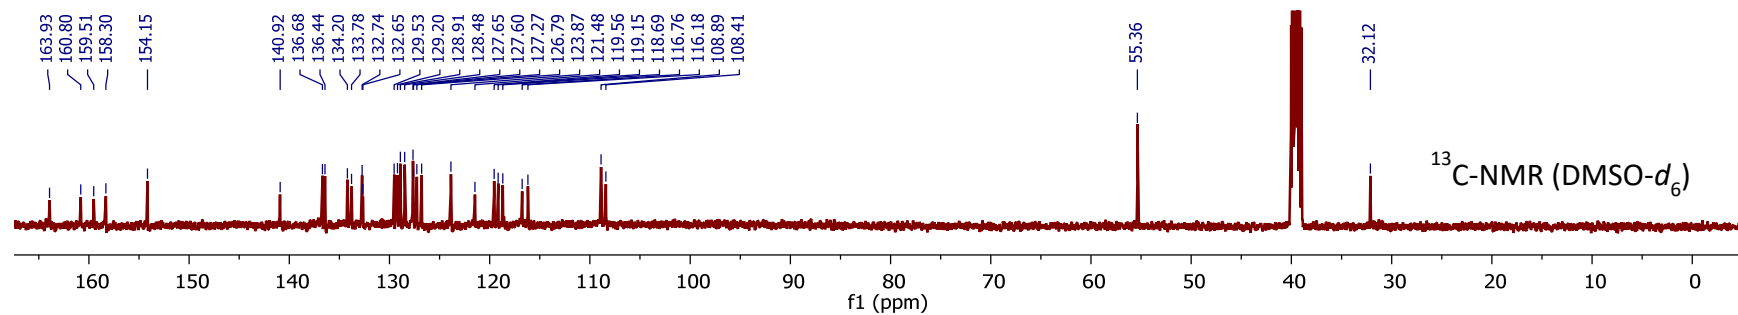



## EI MS (70eV)



## ESI-QTOF (positive ionization)

MS Zoomed Spectrum

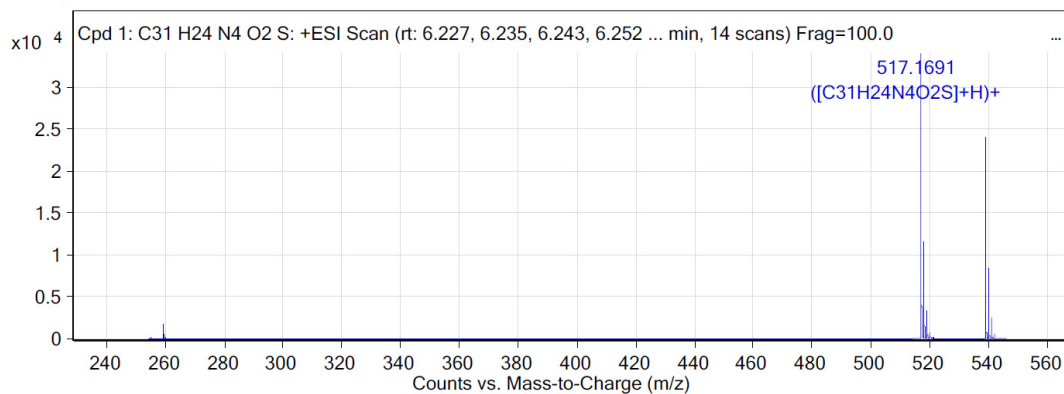

### MS Spectrum Peak List

| m/z      | Calc m/z | Diff(ppm) | z | Abund    | Formula     | Ion      |
|----------|----------|-----------|---|----------|-------------|----------|
| 259.0882 | 259.0883 | 0.29      | 2 | 1807.07  | C31H24N4O2S | (M+2H)+2 |
| 259.5901 | 259.5898 | -1.32     | 2 | 601.35   | C31H24N4O2S | (M+2H)+2 |
| 260.0892 | 260.0892 | -0.06     | 2 | 184.95   | C31H24N4O2S | (M+2H)+2 |
| 517.1691 | 517.1693 | 0.43      | 1 | 35187.08 | C31H24N4O2S | (M+H)+   |
| 518.1726 | 518.1723 | -0.53     | 1 | 12105.11 | C31H24N4O2S | (M+H)+   |
| 519.1719 | 519.1712 | -1.29     | 1 | 3356.03  | C31H24N4O2S | (M+H)+   |
| 539.1511 | 539.1512 | 0.2       | 1 | 24291.18 | C31H24N4O2S | (M+Na)+  |
| 540.1542 | 540.1543 | 0.13      | 1 | 8693.75  | C31H24N4O2S | (M+Na)+  |
| 541.1534 | 541.1531 | -0.5      | 1 | 2476.71  | C31H24N4O2S | (M+Na)+  |
